# Supplementary material for: On Burden of Diseases, Prevention, Medical Research and Health Service Delivery: Grampian Case Study
Source: Preprints.org preprint supplement (doi:10.20944/preprints202312.0361.v1), 2023-12-06
Supplement: Supplementary file 1 [file supplementary]

Year,Cause,Location,Age,Sex,RAG,Measure,Value,Small numbers
2016,All causes of disease and injury,Scotland,Under 15,Male,DALY rate,"5,541.50",No,na
2016,All causes of disease and injury,Scotland,15 to 24,Male,DALY rate,"9,809.60",No,na
2016,All causes of disease and injury,Scotland,25 to 44,Male,DALY rate,"20,303.00",No,na
2016,All causes of disease and injury,Scotland,45 to 64,Male,DALY rate,"36,965.70",No,na
2016,All causes of disease and injury,Scotland,65 to 84,Male,DALY rate,"86,385.70",No,na
2016,All causes of disease and injury,Scotland,85 and over,Male,DALY rate,"175,223.90",No,na
2016,All causes of disease and injury,Scotland,Under 15,Female,DALY rate,"5,207.50",No,na
2016,All causes of disease and injury,Scotland,15 to 24,Female,DALY rate,"9,872.20",No,na
2016,All causes of disease and injury,Scotland,25 to 44,Female,DALY rate,"17,465.80",No,na
2016,All causes of disease and injury,Scotland,45 to 64,Female,DALY rate,"29,868.00",No,na
2016,All causes of disease and injury,Scotland,65 to 84,Female,DALY rate,"66,306.10",No,na
2016,All causes of disease and injury,Scotland,85 and over,Female,DALY rate,"152,559.20",No,na
2016,All causes of disease and injury,Scotland,Under 15,Both sexes,DALY rate,"5,377.90",No,na
2016,All causes of disease and injury,Scotland,15 to 24,Both sexes,DALY rate,"9,843.20",No,na
2016,All causes of disease and injury,Scotland,25 to 44,Both sexes,DALY rate,"18,858.40",No,na
2016,All causes of disease and injury,Scotland,45 to 64,Both sexes,DALY rate,"33,316.10",No,na
2016,All causes of disease and injury,Scotland,65 to 84,Both sexes,DALY rate,"75,434.20",No,na
2016,All causes of disease and injury,Scotland,85 and over,Both sexes,DALY rate,"160,176.60",No,na
2016,HIV/AIDS and tuberculosis,Scotland,Under 15,Male,DALY rate,21.5,Yes,G
2016,HIV/AIDS and tuberculosis,Scotland,15 to 24,Male,DALY rate,3.9,Yes,G
2016,HIV/AIDS and tuberculosis,Scotland,25 to 44,Male,DALY rate,68.4,No,G
2016,HIV/AIDS and tuberculosis,Scotland,45 to 64,Male,DALY rate,102.9,No,G
2016,HIV/AIDS and tuberculosis,Scotland,65 to 84,Male,DALY rate,63.8,No,G
2016,HIV/AIDS and tuberculosis,Scotland,85 and over,Male,DALY rate,173.2,No,G
2016,HIV/AIDS and tuberculosis,Scotland,Under 15,Female,DALY rate,1.2,Yes,G
2016,HIV/AIDS and tuberculosis,Scotland,15 to 24,Female,DALY rate,2.8,Yes,G
2016,HIV/AIDS and tuberculosis,Scotland,25 to 44,Female,DALY rate,30.6,Yes,G
2016,HIV/AIDS and tuberculosis,Scotland,45 to 64,Female,DALY rate,29.1,Yes,G
2016,HIV/AIDS and tuberculosis,Scotland,65 to 84,Female,DALY rate,18.4,No,G
2016,HIV/AIDS and tuberculosis,Scotland,85 and over,Female,DALY rate,31.6,Yes,G
2016,HIV/AIDS and tuberculosis,Scotland,Under 15,Both sexes,DALY rate,11.5,Yes,G
2016,HIV/AIDS and tuberculosis,Scotland,15 to 24,Both sexes,DALY rate,3.4,Yes,G
2016,HIV/AIDS and tuberculosis,Scotland,25 to 44,Both sexes,DALY rate,49.2,No,G
2016,HIV/AIDS and tuberculosis,Scotland,45 to 64,Both sexes,DALY rate,64.9,No,G
2016,HIV/AIDS and tuberculosis,Scotland,65 to 84,Both sexes,DALY rate,39.5,No,G
2016,HIV/AIDS and tuberculosis,Scotland,85 and over,Both sexes,DALY rate,77.5,No,G
2016,Lower respiratory infections,Scotland,Under 15,Male,DALY rate,75.6,Yes,G
2016,Lower respiratory infections,Scotland,15 to 24,Male,DALY rate,82.2,Yes,G
2016,Lower respiratory infections,Scotland,25 to 44,Male,DALY rate,134,No,G
2016,Lower respiratory infections,Scotland,45 to 64,Male,DALY rate,591.5,No,G
2016,Lower respiratory infections,Scotland,65 to 84,Male,DALY rate,"2,170.80",No,G
2016,Lower respiratory infections,Scotland,85 and over,Male,DALY rate,"11,045.20",No,G
2016,Lower respiratory infections,Scotland,Under 15,Female,DALY rate,105,Yes,G
2016,Lower respiratory infections,Scotland,15 to 24,Female,DALY rate,41.4,Yes,G
2016,Lower respiratory infections,Scotland,25 to 44,Female,DALY rate,132.4,No,G
2016,Lower respiratory infections,Scotland,45 to 64,Female,DALY rate,421.2,No,G
2016,Lower respiratory infections,Scotland,65 to 84,Female,DALY rate,"1,475.30",No,G
2016,Lower respiratory infections,Scotland,85 and over,Female,DALY rate,"9,235.90",No,G
2016,Lower respiratory infections,Scotland,Under 15,Both sexes,DALY rate,90,No,G
2016,Lower respiratory infections,Scotland,15 to 24,Both sexes,DALY rate,62.3,Yes,G
2016,Lower respiratory infections,Scotland,25 to 44,Both sexes,DALY rate,133.1,No,G
2016,Lower respiratory infections,Scotland,45 to 64,Both sexes,DALY rate,503.8,No,G
2016,Lower respiratory infections,Scotland,65 to 84,Both sexes,DALY rate,"1,786.70",No,G
2016,Lower respiratory infections,Scotland,85 and over,Both sexes,DALY rate,"9,803.90",No,G
2016,Diarrhoea and other common infections,Scotland,Under 15,Male,DALY rate,247.2,No,A
2016,Diarrhoea and other common infections,Scotland,15 to 24,Male,DALY rate,92.9,Yes,A
2016,Diarrhoea and other common infections,Scotland,25 to 44,Male,DALY rate,117.6,No,A
2016,Diarrhoea and other common infections,Scotland,45 to 64,Male,DALY rate,116,No,A
2016,Diarrhoea and other common infections,Scotland,65 to 84,Male,DALY rate,237.4,No,A
2016,Diarrhoea and other common infections,Scotland,85 and over,Male,DALY rate,447.7,No,A
2016,Diarrhoea and other common infections,Scotland,Under 15,Female,DALY rate,156.8,Yes,A
2016,Diarrhoea and other common infections,Scotland,15 to 24,Female,DALY rate,86.5,Yes,A
2016,Diarrhoea and other common infections,Scotland,25 to 44,Female,DALY rate,94.8,Yes,A
2016,Diarrhoea and other common infections,Scotland,45 to 64,Female,DALY rate,99.5,No,A
2016,Diarrhoea and other common infections,Scotland,65 to 84,Female,DALY rate,290.6,No,A
2016,Diarrhoea and other common infections,Scotland,85 and over,Female,DALY rate,740.6,No,A
2016,Diarrhoea and other common infections,Scotland,Under 15,Both sexes,DALY rate,203.3,No,A
2016,Diarrhoea and other common infections,Scotland,15 to 24,Both sexes,DALY rate,89.6,Yes,A
2016,Diarrhoea and other common infections,Scotland,25 to 44,Both sexes,DALY rate,106,No,A
2016,Diarrhoea and other common infections,Scotland,45 to 64,Both sexes,DALY rate,107.5,No,A
2016,Diarrhoea and other common infections,Scotland,65 to 84,Both sexes,DALY rate,264.9,No,A
2016,Diarrhoea and other common infections,Scotland,85 and over,Both sexes,DALY rate,639.3,No,A
2016,Neonatal disorders,Scotland,Under 15,Male,DALY rate,755.5,No,G
2016,Neonatal disorders,Scotland,15 to 24,Male,DALY rate,33.7,Yes,G
2016,Neonatal disorders,Scotland,25 to 44,Male,DALY rate,0.1,Yes,G
2016,Neonatal disorders,Scotland,45 to 64,Male,DALY rate,4.8,Yes,G
2016,Neonatal disorders,Scotland,65 to 84,Male,DALY rate,0.2,Yes,G
2016,Neonatal disorders,Scotland,85 and over,Male,DALY rate,0,Yes,G
2016,Neonatal disorders,Scotland,Under 15,Female,DALY rate,977.7,No,G
2016,Neonatal disorders,Scotland,15 to 24,Female,DALY rate,8.4,Yes,G
2016,Neonatal disorders,Scotland,25 to 44,Female,DALY rate,0.1,Yes,G
2016,Neonatal disorders,Scotland,45 to 64,Female,DALY rate,0.1,Yes,G
2016,Neonatal disorders,Scotland,65 to 84,Female,DALY rate,0,Yes,G
2016,Neonatal disorders,Scotland,85 and over,Female,DALY rate,1.9,Yes,G
2016,Neonatal disorders,Scotland,Under 15,Both sexes,DALY rate,863.6,No,G
2016,Neonatal disorders,Scotland,15 to 24,Both sexes,DALY rate,21.4,Yes,G
2016,Neonatal disorders,Scotland,25 to 44,Both sexes,DALY rate,0.1,Yes,G
2016,Neonatal disorders,Scotland,45 to 64,Both sexes,DALY rate,2.4,Yes,G
2016,Neonatal disorders,Scotland,65 to 84,Both sexes,DALY rate,0.1,Yes,G
2016,Neonatal disorders,Scotland,85 and over,Both sexes,DALY rate,1.2,Yes,G
2016,Maternal disorders,Scotland,Under 15,Male,DALY rate,0,Yes,A
2016,Maternal disorders,Scotland,15 to 24,Male,DALY rate,0,Yes,A
2016,Maternal disorders,Scotland,25 to 44,Male,DALY rate,0,Yes,A
2016,Maternal disorders,Scotland,45 to 64,Male,DALY rate,0,Yes,A
2016,Maternal disorders,Scotland,65 to 84,Male,DALY rate,0,Yes,A
2016,Maternal disorders,Scotland,85 and over,Male,DALY rate,0,Yes,A
2016,Maternal disorders,Scotland,Under 15,Female,DALY rate,0,Yes,A
2016,Maternal disorders,Scotland,15 to 24,Female,DALY rate,102.2,Yes,A
2016,Maternal disorders,Scotland,25 to 44,Female,DALY rate,91.2,Yes,A
2016,Maternal disorders,Scotland,45 to 64,Female,DALY rate,0.2,Yes,A
2016,Maternal disorders,Scotland,65 to 84,Female,DALY rate,0,Yes,A
2016,Maternal disorders,Scotland,85 and over,Female,DALY rate,0,Yes,A
2016,Maternal disorders,Scotland,Under 15,Both sexes,DALY rate,0,Yes,A
2016,Maternal disorders,Scotland,15 to 24,Both sexes,DALY rate,50.9,Yes,A
2016,Maternal disorders,Scotland,25 to 44,Both sexes,DALY rate,46.4,Yes,A
2016,Maternal disorders,Scotland,45 to 64,Both sexes,DALY rate,0.1,Yes,A
2016,Maternal disorders,Scotland,65 to 84,Both sexes,DALY rate,0,Yes,A
2016,Maternal disorders,Scotland,85 and over,Both sexes,DALY rate,0,Yes,A
2016,Nutritional deficiencies,Scotland,Under 15,Male,DALY rate,64.9,Yes,R
2016,Nutritional deficiencies,Scotland,15 to 24,Male,DALY rate,12.7,Yes,R
2016,Nutritional deficiencies,Scotland,25 to 44,Male,DALY rate,7.6,Yes,R
2016,Nutritional deficiencies,Scotland,45 to 64,Male,DALY rate,57.8,No,R
2016,Nutritional deficiencies,Scotland,65 to 84,Male,DALY rate,169.2,No,R
2016,Nutritional deficiencies,Scotland,85 and over,Male,DALY rate,439.6,No,R
2016,Nutritional deficiencies,Scotland,Under 15,Female,DALY rate,21.1,Yes,R
2016,Nutritional deficiencies,Scotland,15 to 24,Female,DALY rate,96.6,Yes,R
2016,Nutritional deficiencies,Scotland,25 to 44,Female,DALY rate,104.6,Yes,R
2016,Nutritional deficiencies,Scotland,45 to 64,Female,DALY rate,101.3,Yes,R
2016,Nutritional deficiencies,Scotland,65 to 84,Female,DALY rate,208.1,No,R
2016,Nutritional deficiencies,Scotland,85 and over,Female,DALY rate,801.2,No,R
2016,Nutritional deficiencies,Scotland,Under 15,Both sexes,DALY rate,43.6,Yes,R
2016,Nutritional deficiencies,Scotland,15 to 24,Both sexes,DALY rate,54.3,Yes,R
2016,Nutritional deficiencies,Scotland,25 to 44,Both sexes,DALY rate,57,Yes,R
2016,Nutritional deficiencies,Scotland,45 to 64,Both sexes,DALY rate,80.2,No,R
2016,Nutritional deficiencies,Scotland,65 to 84,Both sexes,DALY rate,190.8,No,R
2016,Nutritional deficiencies,Scotland,85 and over,Both sexes,DALY rate,690.3,No,R
2016,"Other communicable, maternal, neonatal and nutritional diseases",Scotland,Under 15,Male,DALY rate,0.3,Yes,G
2016,"Other communicable, maternal, neonatal and nutritional diseases",Scotland,15 to 24,Male,DALY rate,0.5,Yes,G
2016,"Other communicable, maternal, neonatal and nutritional diseases",Scotland,25 to 44,Male,DALY rate,10.5,Yes,G
2016,"Other communicable, maternal, neonatal and nutritional diseases",Scotland,45 to 64,Male,DALY rate,33.6,No,G
2016,"Other communicable, maternal, neonatal and nutritional diseases",Scotland,65 to 84,Male,DALY rate,129.9,No,G
2016,"Other communicable, maternal, neonatal and nutritional diseases",Scotland,85 and over,Male,DALY rate,144.3,No,G
2016,"Other communicable, maternal, neonatal and nutritional diseases",Scotland,Under 15,Female,DALY rate,54.1,Yes,G
2016,"Other communicable, maternal, neonatal and nutritional diseases",Scotland,15 to 24,Female,DALY rate,13.4,Yes,G
2016,"Other communicable, maternal, neonatal and nutritional diseases",Scotland,25 to 44,Female,DALY rate,9.8,Yes,G
2016,"Other communicable, maternal, neonatal and nutritional diseases",Scotland,45 to 64,Female,DALY rate,31.6,No,G
2016,"Other communicable, maternal, neonatal and nutritional diseases",Scotland,65 to 84,Female,DALY rate,38,No,G
2016,"Other communicable, maternal, neonatal and nutritional diseases",Scotland,85 and over,Female,DALY rate,54.9,Yes,G
2016,"Other communicable, maternal, neonatal and nutritional diseases",Scotland,Under 15,Both sexes,DALY rate,26.4,Yes,G
2016,"Other communicable, maternal, neonatal and nutritional diseases",Scotland,15 to 24,Both sexes,DALY rate,6.8,Yes,G
2016,"Other communicable, maternal, neonatal and nutritional diseases",Scotland,25 to 44,Both sexes,DALY rate,10.2,Yes,G
2016,"Other communicable, maternal, neonatal and nutritional diseases",Scotland,45 to 64,Both sexes,DALY rate,32.6,No,G
2016,"Other communicable, maternal, neonatal and nutritional diseases",Scotland,65 to 84,Both sexes,DALY rate,81.2,No,G
2016,"Other communicable, maternal, neonatal and nutritional diseases",Scotland,85 and over,Both sexes,DALY rate,86.2,No,G
2016,Oesophageal cancer,Scotland,Under 15,Male,DALY rate,0,Yes,G
2016,Oesophageal cancer,Scotland,15 to 24,Male,DALY rate,0,Yes,G
2016,Oesophageal cancer,Scotland,25 to 44,Male,DALY rate,61.3,No,G
2016,Oesophageal cancer,Scotland,45 to 64,Male,DALY rate,681.9,No,G
2016,Oesophageal cancer,Scotland,65 to 84,Male,DALY rate,"1,838.90",No,G
2016,Oesophageal cancer,Scotland,85 and over,Male,DALY rate,"1,409.30",No,G
2016,Oesophageal cancer,Scotland,Under 15,Female,DALY rate,0,Yes,G
2016,Oesophageal cancer,Scotland,15 to 24,Female,DALY rate,0,Yes,G
2016,Oesophageal cancer,Scotland,25 to 44,Female,DALY rate,16.4,Yes,G
2016,Oesophageal cancer,Scotland,45 to 64,Female,DALY rate,265.6,No,G
2016,Oesophageal cancer,Scotland,65 to 84,Female,DALY rate,605.5,No,G
2016,Oesophageal cancer,Scotland,85 and over,Female,DALY rate,638,No,G
2016,Oesophageal cancer,Scotland,Under 15,Both sexes,DALY rate,0,Yes,G
2016,Oesophageal cancer,Scotland,15 to 24,Both sexes,DALY rate,0,Yes,G
2016,Oesophageal cancer,Scotland,25 to 44,Both sexes,DALY rate,38.3,No,G
2016,Oesophageal cancer,Scotland,45 to 64,Both sexes,DALY rate,467.8,No,G
2016,Oesophageal cancer,Scotland,65 to 84,Both sexes,DALY rate,"1,176.80",No,G
2016,Oesophageal cancer,Scotland,85 and over,Both sexes,DALY rate,894.4,No,G
2016,Stomach cancer,Scotland,Under 15,Male,DALY rate,0,Yes,G
2016,Stomach cancer,Scotland,15 to 24,Male,DALY rate,39.8,Yes,G
2016,Stomach cancer,Scotland,25 to 44,Male,DALY rate,52,No,G
2016,Stomach cancer,Scotland,45 to 64,Male,DALY rate,305,No,G
2016,Stomach cancer,Scotland,65 to 84,Male,DALY rate,845,No,G
2016,Stomach cancer,Scotland,85 and over,Male,DALY rate,899.5,No,G
2016,Stomach cancer,Scotland,Under 15,Female,DALY rate,0,Yes,G
2016,Stomach cancer,Scotland,15 to 24,Female,DALY rate,0,Yes,G
2016,Stomach cancer,Scotland,25 to 44,Female,DALY rate,26.7,Yes,G
2016,Stomach cancer,Scotland,45 to 64,Female,DALY rate,142.8,No,G
2016,Stomach cancer,Scotland,65 to 84,Female,DALY rate,263.3,No,G
2016,Stomach cancer,Scotland,85 and over,Female,DALY rate,517.9,No,G
2016,Stomach cancer,Scotland,Under 15,Both sexes,DALY rate,0,Yes,G
2016,Stomach cancer,Scotland,15 to 24,Both sexes,DALY rate,19.9,Yes,G
2016,Stomach cancer,Scotland,25 to 44,Both sexes,DALY rate,39,No,G
2016,Stomach cancer,Scotland,45 to 64,Both sexes,DALY rate,221.7,No,G
2016,Stomach cancer,Scotland,65 to 84,Both sexes,DALY rate,525.9,No,G
2016,Stomach cancer,Scotland,85 and over,Both sexes,DALY rate,643.1,No,G
2016,Colorectal cancer,Scotland,Under 15,Male,DALY rate,6.9,Yes,G
2016,Colorectal cancer,Scotland,15 to 24,Male,DALY rate,34.6,Yes,G
2016,Colorectal cancer,Scotland,25 to 44,Male,DALY rate,129.4,No,G
2016,Colorectal cancer,Scotland,45 to 64,Male,DALY rate,900.5,No,G
2016,Colorectal cancer,Scotland,65 to 84,Male,DALY rate,"2,938.00",No,G
2016,Colorectal cancer,Scotland,85 and over,Male,DALY rate,"3,912.00",No,G
2016,Colorectal cancer,Scotland,Under 15,Female,DALY rate,5.8,Yes,G
2016,Colorectal cancer,Scotland,15 to 24,Female,DALY rate,27.3,Yes,G
2016,Colorectal cancer,Scotland,25 to 44,Female,DALY rate,187.4,No,G
2016,Colorectal cancer,Scotland,45 to 64,Female,DALY rate,713,No,G
2016,Colorectal cancer,Scotland,65 to 84,Female,DALY rate,"1,831.70",No,G
2016,Colorectal cancer,Scotland,85 and over,Female,DALY rate,"2,993.80",No,G
2016,Colorectal cancer,Scotland,Under 15,Both sexes,DALY rate,6.4,Yes,G
2016,Colorectal cancer,Scotland,15 to 24,Both sexes,DALY rate,31.2,Yes,G
2016,Colorectal cancer,Scotland,25 to 44,Both sexes,DALY rate,159.1,No,G
2016,Colorectal cancer,Scotland,45 to 64,Both sexes,DALY rate,804.3,No,G
2016,Colorectal cancer,Scotland,65 to 84,Both sexes,DALY rate,"2,330.80",No,G
2016,Colorectal cancer,Scotland,85 and over,Both sexes,DALY rate,"3,295.10",No,G
2016,Liver cancer,Scotland,Under 15,Male,DALY rate,0.1,Yes,G
2016,Liver cancer,Scotland,15 to 24,Male,DALY rate,0.1,Yes,G
2016,Liver cancer,Scotland,25 to 44,Male,DALY rate,26.9,Yes,G
2016,Liver cancer,Scotland,45 to 64,Male,DALY rate,451.5,No,G
2016,Liver cancer,Scotland,65 to 84,Male,DALY rate,"1,142.40",No,G
2016,Liver cancer,Scotland,85 and over,Male,DALY rate,"1,157.30",No,G
2016,Liver cancer,Scotland,Under 15,Female,DALY rate,0.9,Yes,G
2016,Liver cancer,Scotland,15 to 24,Female,DALY rate,0,Yes,G
2016,Liver cancer,Scotland,25 to 44,Female,DALY rate,15.6,Yes,G
2016,Liver cancer,Scotland,45 to 64,Female,DALY rate,188.7,No,G
2016,Liver cancer,Scotland,65 to 84,Female,DALY rate,539,No,G
2016,Liver cancer,Scotland,85 and over,Female,DALY rate,493.8,No,G
2016,Liver cancer,Scotland,Under 15,Both sexes,DALY rate,0.5,Yes,G
2016,Liver cancer,Scotland,15 to 24,Both sexes,DALY rate,0.1,Yes,G
2016,Liver cancer,Scotland,25 to 44,Both sexes,DALY rate,21.1,No,G
2016,Liver cancer,Scotland,45 to 64,Both sexes,DALY rate,316.5,No,G
2016,Liver cancer,Scotland,65 to 84,Both sexes,DALY rate,816.7,No,G
2016,Liver cancer,Scotland,85 and over,Both sexes,DALY rate,710.7,No,G
2016,Pancreatic cancer,Scotland,Under 15,Male,DALY rate,0,Yes,G
2016,Pancreatic cancer,Scotland,15 to 24,Male,DALY rate,0,Yes,G
2016,Pancreatic cancer,Scotland,25 to 44,Male,DALY rate,19,Yes,G
2016,Pancreatic cancer,Scotland,45 to 64,Male,DALY rate,421.7,No,G
2016,Pancreatic cancer,Scotland,65 to 84,Male,DALY rate,"1,151.60",No,G
2016,Pancreatic cancer,Scotland,85 and over,Male,DALY rate,996.4,No,G
2016,Pancreatic cancer,Scotland,Under 15,Female,DALY rate,0,Yes,G
2016,Pancreatic cancer,Scotland,15 to 24,Female,DALY rate,0,Yes,G
2016,Pancreatic cancer,Scotland,25 to 44,Female,DALY rate,38.3,No,G
2016,Pancreatic cancer,Scotland,45 to 64,Female,DALY rate,273.7,No,G
2016,Pancreatic cancer,Scotland,65 to 84,Female,DALY rate,"1,020.70",No,G
2016,Pancreatic cancer,Scotland,85 and over,Female,DALY rate,717,No,G
2016,Pancreatic cancer,Scotland,Under 15,Both sexes,DALY rate,0,Yes,G
2016,Pancreatic cancer,Scotland,15 to 24,Both sexes,DALY rate,0,Yes,G
2016,Pancreatic cancer,Scotland,25 to 44,Both sexes,DALY rate,28.9,No,G
2016,Pancreatic cancer,Scotland,45 to 64,Both sexes,DALY rate,345.6,No,G
2016,Pancreatic cancer,Scotland,65 to 84,Both sexes,DALY rate,"1,081.90",No,G
2016,Pancreatic cancer,Scotland,85 and over,Both sexes,DALY rate,810.9,No,G
2016,Lung cancer,Scotland,Under 15,Male,DALY rate,0,Yes,G
2016,Lung cancer,Scotland,15 to 24,Male,DALY rate,0,Yes,G
2016,Lung cancer,Scotland,25 to 44,Male,DALY rate,154.3,No,G
2016,Lung cancer,Scotland,45 to 64,Male,DALY rate,"2,045.90",No,G
2016,Lung cancer,Scotland,65 to 84,Male,DALY rate,"6,895.50",No,G
2016,Lung cancer,Scotland,85 and over,Male,DALY rate,"6,552.30",No,G
2016,Lung cancer,Scotland,Under 15,Female,DALY rate,0,Yes,G
2016,Lung cancer,Scotland,15 to 24,Female,DALY rate,0,Yes,G
2016,Lung cancer,Scotland,25 to 44,Female,DALY rate,103.5,No,G
2016,Lung cancer,Scotland,45 to 64,Female,DALY rate,"1,624.30",No,G
2016,Lung cancer,Scotland,65 to 84,Female,DALY rate,"5,405.50",No,G
2016,Lung cancer,Scotland,85 and over,Female,DALY rate,"3,802.40",No,G
2016,Lung cancer,Scotland,Under 15,Both sexes,DALY rate,0,Yes,G
2016,Lung cancer,Scotland,15 to 24,Both sexes,DALY rate,0,Yes,G
2016,Lung cancer,Scotland,25 to 44,Both sexes,DALY rate,128.3,No,G
2016,Lung cancer,Scotland,45 to 64,Both sexes,DALY rate,"1,828.90",No,G
2016,Lung cancer,Scotland,65 to 84,Both sexes,DALY rate,"6,078.50",No,G
2016,Lung cancer,Scotland,85 and over,Both sexes,DALY rate,"4,714.10",No,G
2016,Breast cancer,Scotland,Under 15,Male,DALY rate,0.1,Yes,G
2016,Breast cancer,Scotland,15 to 24,Male,DALY rate,4.8,Yes,G
2016,Breast cancer,Scotland,25 to 44,Male,DALY rate,22.9,Yes,G
2016,Breast cancer,Scotland,45 to 64,Male,DALY rate,25,Yes,G
2016,Breast cancer,Scotland,65 to 84,Male,DALY rate,24.4,Yes,G
2016,Breast cancer,Scotland,85 and over,Male,DALY rate,55.6,Yes,G
2016,Breast cancer,Scotland,Under 15,Female,DALY rate,0.3,Yes,G
2016,Breast cancer,Scotland,15 to 24,Female,DALY rate,18.6,Yes,G
2016,Breast cancer,Scotland,25 to 44,Female,DALY rate,598.6,No,G
2016,Breast cancer,Scotland,45 to 64,Female,DALY rate,"1,655.20",No,G
2016,Breast cancer,Scotland,65 to 84,Female,DALY rate,"2,349.20",No,G
2016,Breast cancer,Scotland,85 and over,Female,DALY rate,"3,441.30",No,G
2016,Breast cancer,Scotland,Under 15,Both sexes,DALY rate,0.2,Yes,G
2016,Breast cancer,Scotland,15 to 24,Both sexes,DALY rate,11.7,Yes,G
2016,Breast cancer,Scotland,25 to 44,Both sexes,DALY rate,316.3,No,G
2016,Breast cancer,Scotland,45 to 64,Both sexes,DALY rate,863.4,No,G
2016,Breast cancer,Scotland,65 to 84,Both sexes,DALY rate,"1,287.70",No,G
2016,Breast cancer,Scotland,85 and over,Both sexes,DALY rate,"2,320.80",No,G
2016,Ovarian cancer,Scotland,Under 15,Male,DALY rate,0,Yes,G
2016,Ovarian cancer,Scotland,15 to 24,Male,DALY rate,0,Yes,G
2016,Ovarian cancer,Scotland,25 to 44,Male,DALY rate,0,Yes,G
2016,Ovarian cancer,Scotland,45 to 64,Male,DALY rate,0,Yes,G
2016,Ovarian cancer,Scotland,65 to 84,Male,DALY rate,0,Yes,G
2016,Ovarian cancer,Scotland,85 and over,Male,DALY rate,0,Yes,G
2016,Ovarian cancer,Scotland,Under 15,Female,DALY rate,0.8,Yes,G
2016,Ovarian cancer,Scotland,15 to 24,Female,DALY rate,0.5,Yes,G
2016,Ovarian cancer,Scotland,25 to 44,Female,DALY rate,66.4,No,G
2016,Ovarian cancer,Scotland,45 to 64,Female,DALY rate,458.8,No,G
2016,Ovarian cancer,Scotland,65 to 84,Female,DALY rate,872.6,No,G
2016,Ovarian cancer,Scotland,85 and over,Female,DALY rate,631.6,No,G
2016,Ovarian cancer,Scotland,Under 15,Both sexes,DALY rate,0.4,Yes,G
2016,Ovarian cancer,Scotland,15 to 24,Both sexes,DALY rate,0.2,Yes,G
2016,Ovarian cancer,Scotland,25 to 44,Both sexes,DALY rate,33.8,No,G
2016,Ovarian cancer,Scotland,45 to 64,Both sexes,DALY rate,235.7,No,G
2016,Ovarian cancer,Scotland,65 to 84,Both sexes,DALY rate,472.9,No,G
2016,Ovarian cancer,Scotland,85 and over,Both sexes,DALY rate,417.1,No,G
2016,Prostate cancer,Scotland,Under 15,Male,DALY rate,0.1,Yes,G
2016,Prostate cancer,Scotland,15 to 24,Male,DALY rate,0,Yes,G
2016,Prostate cancer,Scotland,25 to 44,Male,DALY rate,0.3,Yes,G
2016,Prostate cancer,Scotland,45 to 64,Male,DALY rate,372.3,No,G
2016,Prostate cancer,Scotland,65 to 84,Male,DALY rate,"3,035.10",No,G
2016,Prostate cancer,Scotland,85 and over,Male,DALY rate,"7,391.40",No,G
2016,Prostate cancer,Scotland,Under 15,Female,DALY rate,0,Yes,G
2016,Prostate cancer,Scotland,15 to 24,Female,DALY rate,0,Yes,G
2016,Prostate cancer,Scotland,25 to 44,Female,DALY rate,0,Yes,G
2016,Prostate cancer,Scotland,45 to 64,Female,DALY rate,0,Yes,G
2016,Prostate cancer,Scotland,65 to 84,Female,DALY rate,0,Yes,G
2016,Prostate cancer,Scotland,85 and over,Female,DALY rate,0,Yes,G
2016,Prostate cancer,Scotland,Under 15,Both sexes,DALY rate,0,Yes,G
2016,Prostate cancer,Scotland,15 to 24,Both sexes,DALY rate,0,Yes,G
2016,Prostate cancer,Scotland,25 to 44,Both sexes,DALY rate,0.2,Yes,G
2016,Prostate cancer,Scotland,45 to 64,Both sexes,DALY rate,181.1,No,G
2016,Prostate cancer,Scotland,65 to 84,Both sexes,DALY rate,"1,360.00",No,G
2016,Prostate cancer,Scotland,85 and over,Both sexes,DALY rate,"2,459.50",No,G
2016,Kidney cancer,Scotland,Under 15,Male,DALY rate,0.3,Yes,G
2016,Kidney cancer,Scotland,15 to 24,Male,DALY rate,0.1,Yes,G
2016,Kidney cancer,Scotland,25 to 44,Male,DALY rate,51.8,No,G
2016,Kidney cancer,Scotland,45 to 64,Male,DALY rate,315.1,No,G
2016,Kidney cancer,Scotland,65 to 84,Male,DALY rate,807,No,G
2016,Kidney cancer,Scotland,85 and over,Male,DALY rate,896.7,No,G
2016,Kidney cancer,Scotland,Under 15,Female,DALY rate,21.8,Yes,G
2016,Kidney cancer,Scotland,15 to 24,Female,DALY rate,0.1,Yes,G
2016,Kidney cancer,Scotland,25 to 44,Female,DALY rate,0.9,Yes,G
2016,Kidney cancer,Scotland,45 to 64,Female,DALY rate,154.9,No,G
2016,Kidney cancer,Scotland,65 to 84,Female,DALY rate,424.8,No,G
2016,Kidney cancer,Scotland,85 and over,Female,DALY rate,408.6,No,G
2016,Kidney cancer,Scotland,Under 15,Both sexes,DALY rate,10.8,Yes,G
2016,Kidney cancer,Scotland,15 to 24,Both sexes,DALY rate,0.1,Yes,G
2016,Kidney cancer,Scotland,25 to 44,Both sexes,DALY rate,25.8,No,G
2016,Kidney cancer,Scotland,45 to 64,Both sexes,DALY rate,232.9,No,G
2016,Kidney cancer,Scotland,65 to 84,Both sexes,DALY rate,596.9,No,G
2016,Kidney cancer,Scotland,85 and over,Both sexes,DALY rate,568.4,No,G
2016,Bladder cancer,Scotland,Under 15,Male,DALY rate,1.4,Yes,G
2016,Bladder cancer,Scotland,15 to 24,Male,DALY rate,1.6,Yes,G
2016,Bladder cancer,Scotland,25 to 44,Male,DALY rate,17.4,Yes,G
2016,Bladder cancer,Scotland,45 to 64,Male,DALY rate,183.3,No,G
2016,Bladder cancer,Scotland,65 to 84,Male,DALY rate,"1,112.30",No,G
2016,Bladder cancer,Scotland,85 and over,Male,DALY rate,"2,269.60",No,G
2016,Bladder cancer,Scotland,Under 15,Female,DALY rate,0,Yes,G
2016,Bladder cancer,Scotland,15 to 24,Female,DALY rate,0.4,Yes,G
2016,Bladder cancer,Scotland,25 to 44,Female,DALY rate,10.7,Yes,G
2016,Bladder cancer,Scotland,45 to 64,Female,DALY rate,116.9,No,G
2016,Bladder cancer,Scotland,65 to 84,Female,DALY rate,415,No,G
2016,Bladder cancer,Scotland,85 and over,Female,DALY rate,810.8,No,G
2016,Bladder cancer,Scotland,Under 15,Both sexes,DALY rate,0.7,Yes,G
2016,Bladder cancer,Scotland,15 to 24,Both sexes,DALY rate,1,Yes,G
2016,Bladder cancer,Scotland,25 to 44,Both sexes,DALY rate,14,Yes,G
2016,Bladder cancer,Scotland,45 to 64,Both sexes,DALY rate,149.2,No,G
2016,Bladder cancer,Scotland,65 to 84,Both sexes,DALY rate,731.7,No,G
2016,Bladder cancer,Scotland,85 and over,Both sexes,DALY rate,"1,289.50",No,G
2016,Non-Hodgkin's lymphoma,Scotland,Under 15,Male,DALY rate,0.4,Yes,G
2016,Non-Hodgkin's lymphoma,Scotland,15 to 24,Male,DALY rate,40.7,Yes,G
2016,Non-Hodgkin's lymphoma,Scotland,25 to 44,Male,DALY rate,28.8,Yes,G
2016,Non-Hodgkin's lymphoma,Scotland,45 to 64,Male,DALY rate,214.6,No,G
2016,Non-Hodgkin's lymphoma,Scotland,65 to 84,Male,DALY rate,844.2,No,G
2016,Non-Hodgkin's lymphoma,Scotland,85 and over,Male,DALY rate,"1,563.10",No,G
2016,Non-Hodgkin's lymphoma,Scotland,Under 15,Female,DALY rate,0.1,Yes,G
2016,Non-Hodgkin's lymphoma,Scotland,15 to 24,Female,DALY rate,40,Yes,G
2016,Non-Hodgkin's lymphoma,Scotland,25 to 44,Female,DALY rate,33.2,Yes,G
2016,Non-Hodgkin's lymphoma,Scotland,45 to 64,Female,DALY rate,147.6,No,G
2016,Non-Hodgkin's lymphoma,Scotland,65 to 84,Female,DALY rate,601,No,G
2016,Non-Hodgkin's lymphoma,Scotland,85 and over,Female,DALY rate,707.5,No,G
2016,Non-Hodgkin's lymphoma,Scotland,Under 15,Both sexes,DALY rate,0.2,Yes,G
2016,Non-Hodgkin's lymphoma,Scotland,15 to 24,Both sexes,DALY rate,40.4,Yes,G
2016,Non-Hodgkin's lymphoma,Scotland,25 to 44,Both sexes,DALY rate,31,No,G
2016,Non-Hodgkin's lymphoma,Scotland,45 to 64,Both sexes,DALY rate,180.2,No,G
2016,Non-Hodgkin's lymphoma,Scotland,65 to 84,Both sexes,DALY rate,707.4,No,G
2016,Non-Hodgkin's lymphoma,Scotland,85 and over,Both sexes,DALY rate,997.3,No,G
2016,Multiple myeloma,Scotland,Under 15,Male,DALY rate,0,Yes,G
2016,Multiple myeloma,Scotland,15 to 24,Male,DALY rate,0,Yes,G
2016,Multiple myeloma,Scotland,25 to 44,Male,DALY rate,8.8,Yes,G
2016,Multiple myeloma,Scotland,45 to 64,Male,DALY rate,116.9,No,G
2016,Multiple myeloma,Scotland,65 to 84,Male,DALY rate,413.4,No,G
2016,Multiple myeloma,Scotland,85 and over,Male,DALY rate,761.7,No,G
2016,Multiple myeloma,Scotland,Under 15,Female,DALY rate,0,Yes,G
2016,Multiple myeloma,Scotland,15 to 24,Female,DALY rate,0,Yes,G
2016,Multiple myeloma,Scotland,25 to 44,Female,DALY rate,7.7,Yes,G
2016,Multiple myeloma,Scotland,45 to 64,Female,DALY rate,66.1,No,G
2016,Multiple myeloma,Scotland,65 to 84,Female,DALY rate,276.9,No,G
2016,Multiple myeloma,Scotland,85 and over,Female,DALY rate,402.5,No,G
2016,Multiple myeloma,Scotland,Under 15,Both sexes,DALY rate,0,Yes,G
2016,Multiple myeloma,Scotland,15 to 24,Both sexes,DALY rate,0,Yes,G
2016,Multiple myeloma,Scotland,25 to 44,Both sexes,DALY rate,8.2,Yes,G
2016,Multiple myeloma,Scotland,45 to 64,Both sexes,DALY rate,90.7,No,G
2016,Multiple myeloma,Scotland,65 to 84,Both sexes,DALY rate,338.5,No,G
2016,Multiple myeloma,Scotland,85 and over,Both sexes,DALY rate,522.8,No,G
2016,Leukaemia,Scotland,Under 15,Male,DALY rate,40.4,Yes,G
2016,Leukaemia,Scotland,15 to 24,Male,DALY rate,25.8,Yes,G
2016,Leukaemia,Scotland,25 to 44,Male,DALY rate,53.9,No,G
2016,Leukaemia,Scotland,45 to 64,Male,DALY rate,117.9,No,G
2016,Leukaemia,Scotland,65 to 84,Male,DALY rate,854.1,No,G
2016,Leukaemia,Scotland,85 and over,Male,DALY rate,842.1,No,G
2016,Leukaemia,Scotland,Under 15,Female,DALY rate,8.5,Yes,G
2016,Leukaemia,Scotland,15 to 24,Female,DALY rate,40.6,Yes,G
2016,Leukaemia,Scotland,25 to 44,Female,DALY rate,34.7,Yes,G
2016,Leukaemia,Scotland,45 to 64,Female,DALY rate,110.1,No,G
2016,Leukaemia,Scotland,65 to 84,Female,DALY rate,362.7,No,G
2016,Leukaemia,Scotland,85 and over,Female,DALY rate,613.9,No,G
2016,Leukaemia,Scotland,Under 15,Both sexes,DALY rate,24.8,Yes,G
2016,Leukaemia,Scotland,15 to 24,Both sexes,DALY rate,33.5,Yes,G
2016,Leukaemia,Scotland,25 to 44,Both sexes,DALY rate,44.1,No,G
2016,Leukaemia,Scotland,45 to 64,Both sexes,DALY rate,113.8,No,G
2016,Leukaemia,Scotland,65 to 84,Both sexes,DALY rate,586.9,No,G
2016,Leukaemia,Scotland,85 and over,Both sexes,DALY rate,684.4,No,G
2016,Other cancers,Scotland,Under 15,Male,DALY rate,153.9,No,G
2016,Other cancers,Scotland,15 to 24,Male,DALY rate,178,No,G
2016,Other cancers,Scotland,25 to 44,Male,DALY rate,481.9,No,G
2016,Other cancers,Scotland,45 to 64,Male,DALY rate,"1,710.70",No,G
2016,Other cancers,Scotland,65 to 84,Male,DALY rate,"3,780.70",No,G
2016,Other cancers,Scotland,85 and over,Male,DALY rate,"4,395.70",No,G
2016,Other cancers,Scotland,Under 15,Female,DALY rate,128.1,No,G
2016,Other cancers,Scotland,15 to 24,Female,DALY rate,117,No,G
2016,Other cancers,Scotland,25 to 44,Female,DALY rate,477.5,No,G
2016,Other cancers,Scotland,45 to 64,Female,DALY rate,"1,158.70",No,G
2016,Other cancers,Scotland,65 to 84,Female,DALY rate,"2,875.10",No,G
2016,Other cancers,Scotland,85 and over,Female,DALY rate,"3,081.80",No,G
2016,Other cancers,Scotland,Under 15,Both sexes,DALY rate,141.2,No,G
2016,Other cancers,Scotland,15 to 24,Both sexes,DALY rate,147.5,No,G
2016,Other cancers,Scotland,25 to 44,Both sexes,DALY rate,479.8,No,G
2016,Other cancers,Scotland,45 to 64,Both sexes,DALY rate,"1,426.70",No,G
2016,Other cancers,Scotland,65 to 84,Both sexes,DALY rate,"3,290.40",No,G
2016,Other cancers,Scotland,85 and over,Both sexes,DALY rate,"3,541.20",No,G
2016,Ischaemic heart disease,Scotland,Under 15,Male,DALY rate,0.7,Yes,G
2016,Ischaemic heart disease,Scotland,15 to 24,Male,DALY rate,1,Yes,G
2016,Ischaemic heart disease,Scotland,25 to 44,Male,DALY rate,570.1,No,G
2016,Ischaemic heart disease,Scotland,45 to 64,Male,DALY rate,"4,415.80",No,G
2016,Ischaemic heart disease,Scotland,65 to 84,Male,DALY rate,"11,742.50",No,G
2016,Ischaemic heart disease,Scotland,85 and over,Male,DALY rate,"22,448.70",No,G
2016,Ischaemic heart disease,Scotland,Under 15,Female,DALY rate,0.7,Yes,G
2016,Ischaemic heart disease,Scotland,15 to 24,Female,DALY rate,20.6,Yes,G
2016,Ischaemic heart disease,Scotland,25 to 44,Female,DALY rate,178,No,G
2016,Ischaemic heart disease,Scotland,45 to 64,Female,DALY rate,"1,256.60",No,G
2016,Ischaemic heart disease,Scotland,65 to 84,Female,DALY rate,"5,767.80",No,G
2016,Ischaemic heart disease,Scotland,85 and over,Female,DALY rate,"15,778.70",No,G
2016,Ischaemic heart disease,Scotland,Under 15,Both sexes,DALY rate,0.7,Yes,G
2016,Ischaemic heart disease,Scotland,15 to 24,Both sexes,DALY rate,10.8,Yes,G
2016,Ischaemic heart disease,Scotland,25 to 44,Both sexes,DALY rate,370.1,No,G
2016,Ischaemic heart disease,Scotland,45 to 64,Both sexes,DALY rate,"2,791.70",No,G
2016,Ischaemic heart disease,Scotland,65 to 84,Both sexes,DALY rate,"8,477.60",No,G
2016,Ischaemic heart disease,Scotland,85 and over,Both sexes,DALY rate,"17,962.50",No,G
2016,Cerebrovascular disease,Scotland,Under 15,Male,DALY rate,33.7,Yes,G
2016,Cerebrovascular disease,Scotland,15 to 24,Male,DALY rate,26.2,Yes,G
2016,Cerebrovascular disease,Scotland,25 to 44,Male,DALY rate,223.7,No,G
2016,Cerebrovascular disease,Scotland,45 to 64,Male,DALY rate,"1,289.60",No,G
2016,Cerebrovascular disease,Scotland,65 to 84,Male,DALY rate,"5,516.30",No,G
2016,Cerebrovascular disease,Scotland,85 and over,Male,DALY rate,"17,702.20",No,G
2016,Cerebrovascular disease,Scotland,Under 15,Female,DALY rate,26.7,Yes,G
2016,Cerebrovascular disease,Scotland,15 to 24,Female,DALY rate,53.5,Yes,G
2016,Cerebrovascular disease,Scotland,25 to 44,Female,DALY rate,222.4,No,G
2016,Cerebrovascular disease,Scotland,45 to 64,Female,DALY rate,915.9,No,G
2016,Cerebrovascular disease,Scotland,65 to 84,Female,DALY rate,"4,531.70",No,G
2016,Cerebrovascular disease,Scotland,85 and over,Female,DALY rate,"17,188.70",No,G
2016,Cerebrovascular disease,Scotland,Under 15,Both sexes,DALY rate,30.2,Yes,G
2016,Cerebrovascular disease,Scotland,15 to 24,Both sexes,DALY rate,39.8,Yes,G
2016,Cerebrovascular disease,Scotland,25 to 44,Both sexes,DALY rate,223.2,No,G
2016,Cerebrovascular disease,Scotland,45 to 64,Both sexes,DALY rate,"1,097.50",No,G
2016,Cerebrovascular disease,Scotland,65 to 84,Both sexes,DALY rate,"4,980.10",No,G
2016,Cerebrovascular disease,Scotland,85 and over,Both sexes,DALY rate,"17,383.00",No,G
2016,Atrial fibrillation and flutter,Scotland,Under 15,Male,DALY rate,0.2,Yes,G
2016,Atrial fibrillation and flutter,Scotland,15 to 24,Male,DALY rate,2.9,Yes,G
2016,Atrial fibrillation and flutter,Scotland,25 to 44,Male,DALY rate,44.8,Yes,G
2016,Atrial fibrillation and flutter,Scotland,45 to 64,Male,DALY rate,206.6,No,G
2016,Atrial fibrillation and flutter,Scotland,65 to 84,Male,DALY rate,"1,634.00",No,G
2016,Atrial fibrillation and flutter,Scotland,85 and over,Male,DALY rate,"5,409.50",No,G
2016,Atrial fibrillation and flutter,Scotland,Under 15,Female,DALY rate,0.2,Yes,G
2016,Atrial fibrillation and flutter,Scotland,15 to 24,Female,DALY rate,0.8,Yes,G
2016,Atrial fibrillation and flutter,Scotland,25 to 44,Female,DALY rate,6.7,Yes,G
2016,Atrial fibrillation and flutter,Scotland,45 to 64,Female,DALY rate,83,No,G
2016,Atrial fibrillation and flutter,Scotland,65 to 84,Female,DALY rate,"1,041.40",No,G
2016,Atrial fibrillation and flutter,Scotland,85 and over,Female,DALY rate,"5,496.10",No,G
2016,Atrial fibrillation and flutter,Scotland,Under 15,Both sexes,DALY rate,0.2,Yes,G
2016,Atrial fibrillation and flutter,Scotland,15 to 24,Both sexes,DALY rate,1.9,Yes,G
2016,Atrial fibrillation and flutter,Scotland,25 to 44,Both sexes,DALY rate,25.3,Yes,G
2016,Atrial fibrillation and flutter,Scotland,45 to 64,Both sexes,DALY rate,143.2,No,G
2016,Atrial fibrillation and flutter,Scotland,65 to 84,Both sexes,DALY rate,"1,310.40",No,G
2016,Atrial fibrillation and flutter,Scotland,85 and over,Both sexes,DALY rate,"5,479.20",No,G
2016,Peripheral vascular disease,Scotland,Under 15,Male,DALY rate,0,Yes,G
2016,Peripheral vascular disease,Scotland,15 to 24,Male,DALY rate,0,Yes,G
2016,Peripheral vascular disease,Scotland,25 to 44,Male,DALY rate,2.2,Yes,G
2016,Peripheral vascular disease,Scotland,45 to 64,Male,DALY rate,52.4,No,G
2016,Peripheral vascular disease,Scotland,65 to 84,Male,DALY rate,334.2,No,G
2016,Peripheral vascular disease,Scotland,85 and over,Male,DALY rate,"1,294.90",No,G
2016,Peripheral vascular disease,Scotland,Under 15,Female,DALY rate,0,Yes,G
2016,Peripheral vascular disease,Scotland,15 to 24,Female,DALY rate,0,Yes,G
2016,Peripheral vascular disease,Scotland,25 to 44,Female,DALY rate,4.9,Yes,G
2016,Peripheral vascular disease,Scotland,45 to 64,Female,DALY rate,51.4,No,G
2016,Peripheral vascular disease,Scotland,65 to 84,Female,DALY rate,316.5,No,G
2016,Peripheral vascular disease,Scotland,85 and over,Female,DALY rate,"1,262.50",No,G
2016,Peripheral vascular disease,Scotland,Under 15,Both sexes,DALY rate,0,Yes,G
2016,Peripheral vascular disease,Scotland,15 to 24,Both sexes,DALY rate,0,Yes,G
2016,Peripheral vascular disease,Scotland,25 to 44,Both sexes,DALY rate,3.6,Yes,G
2016,Peripheral vascular disease,Scotland,45 to 64,Both sexes,DALY rate,51.9,No,G
2016,Peripheral vascular disease,Scotland,65 to 84,Both sexes,DALY rate,326.4,No,G
2016,Peripheral vascular disease,Scotland,85 and over,Both sexes,DALY rate,"1,271.80",No,G
2016,Other cardiovascular and circulatory diseases,Scotland,Under 15,Male,DALY rate,87.7,Yes,G
2016,Other cardiovascular and circulatory diseases,Scotland,15 to 24,Male,DALY rate,115.1,Yes,G
2016,Other cardiovascular and circulatory diseases,Scotland,25 to 44,Male,DALY rate,389.1,No,G
2016,Other cardiovascular and circulatory diseases,Scotland,45 to 64,Male,DALY rate,"1,117.80",No,G
2016,Other cardiovascular and circulatory diseases,Scotland,65 to 84,Male,DALY rate,"3,336.00",No,G
2016,Other cardiovascular and circulatory diseases,Scotland,85 and over,Male,DALY rate,"7,514.40",No,G
2016,Other cardiovascular and circulatory diseases,Scotland,Under 15,Female,DALY rate,67.9,Yes,G
2016,Other cardiovascular and circulatory diseases,Scotland,15 to 24,Female,DALY rate,77.1,Yes,G
2016,Other cardiovascular and circulatory diseases,Scotland,25 to 44,Female,DALY rate,306.6,No,G
2016,Other cardiovascular and circulatory diseases,Scotland,45 to 64,Female,DALY rate,593.1,No,G
2016,Other cardiovascular and circulatory diseases,Scotland,65 to 84,Female,DALY rate,"2,183.80",No,G
2016,Other cardiovascular and circulatory diseases,Scotland,85 and over,Female,DALY rate,"5,838.10",No,G
2016,Other cardiovascular and circulatory diseases,Scotland,Under 15,Both sexes,DALY rate,78.1,No,G
2016,Other cardiovascular and circulatory diseases,Scotland,15 to 24,Both sexes,DALY rate,96.4,No,G
2016,Other cardiovascular and circulatory diseases,Scotland,25 to 44,Both sexes,DALY rate,347.1,No,G
2016,Other cardiovascular and circulatory diseases,Scotland,45 to 64,Both sexes,DALY rate,847.9,No,G
2016,Other cardiovascular and circulatory diseases,Scotland,65 to 84,Both sexes,DALY rate,"2,716.00",No,G
2016,Other cardiovascular and circulatory diseases,Scotland,85 and over,Both sexes,DALY rate,"6,404.50",No,G
2016,Asthma,Scotland,Under 15,Male,DALY rate,436.5,Yes,A
2016,Asthma,Scotland,15 to 24,Male,DALY rate,354.6,Yes,A
2016,Asthma,Scotland,25 to 44,Male,DALY rate,280.3,No,A
2016,Asthma,Scotland,45 to 64,Male,DALY rate,207.9,No,A
2016,Asthma,Scotland,65 to 84,Male,DALY rate,211.5,No,A
2016,Asthma,Scotland,85 and over,Male,DALY rate,292.3,No,A
2016,Asthma,Scotland,Under 15,Female,DALY rate,299.4,Yes,A
2016,Asthma,Scotland,15 to 24,Female,DALY rate,419.4,Yes,A
2016,Asthma,Scotland,25 to 44,Female,DALY rate,370.7,Yes,A
2016,Asthma,Scotland,45 to 64,Female,DALY rate,340.6,No,A
2016,Asthma,Scotland,65 to 84,Female,DALY rate,370.3,No,A
2016,Asthma,Scotland,85 and over,Female,DALY rate,574.7,No,A
2016,Asthma,Scotland,Under 15,Both sexes,DALY rate,369.5,Yes,A
2016,Asthma,Scotland,15 to 24,Both sexes,DALY rate,386.8,No,A
2016,Asthma,Scotland,25 to 44,Both sexes,DALY rate,326.2,No,A
2016,Asthma,Scotland,45 to 64,Both sexes,DALY rate,276.2,No,A
2016,Asthma,Scotland,65 to 84,Both sexes,DALY rate,298.2,No,A
2016,Asthma,Scotland,85 and over,Both sexes,DALY rate,483.1,No,A
2016,Chronic obstructive pulmonary disease,Scotland,Under 15,Male,DALY rate,0.3,Yes,G
2016,Chronic obstructive pulmonary disease,Scotland,15 to 24,Male,DALY rate,10,Yes,G
2016,Chronic obstructive pulmonary disease,Scotland,25 to 44,Male,DALY rate,98.8,No,G
2016,Chronic obstructive pulmonary disease,Scotland,45 to 64,Male,DALY rate,"1,079.60",No,G
2016,Chronic obstructive pulmonary disease,Scotland,65 to 84,Male,DALY rate,"5,488.10",No,G
2016,Chronic obstructive pulmonary disease,Scotland,85 and over,Male,DALY rate,"9,003.60",No,G
2016,Chronic obstructive pulmonary disease,Scotland,Under 15,Female,DALY rate,0.3,Yes,G
2016,Chronic obstructive pulmonary disease,Scotland,15 to 24,Female,DALY rate,14.3,Yes,G
2016,Chronic obstructive pulmonary disease,Scotland,25 to 44,Female,DALY rate,84.4,Yes,G
2016,Chronic obstructive pulmonary disease,Scotland,45 to 64,Female,DALY rate,"1,157.30",No,G
2016,Chronic obstructive pulmonary disease,Scotland,65 to 84,Female,DALY rate,"5,260.50",No,G
2016,Chronic obstructive pulmonary disease,Scotland,85 and over,Female,DALY rate,"6,455.60",No,G
2016,Chronic obstructive pulmonary disease,Scotland,Under 15,Both sexes,DALY rate,0.3,Yes,G
2016,Chronic obstructive pulmonary disease,Scotland,15 to 24,Both sexes,DALY rate,12.2,Yes,G
2016,Chronic obstructive pulmonary disease,Scotland,25 to 44,Both sexes,DALY rate,91.5,No,G
2016,Chronic obstructive pulmonary disease,Scotland,45 to 64,Both sexes,DALY rate,"1,119.60",No,G
2016,Chronic obstructive pulmonary disease,Scotland,65 to 84,Both sexes,DALY rate,"5,352.70",No,G
2016,Chronic obstructive pulmonary disease,Scotland,85 and over,Both sexes,DALY rate,"7,280.30",No,G
2016,Other chronic respiratory diseases,Scotland,Under 15,Male,DALY rate,0.9,Yes,G
2016,Other chronic respiratory diseases,Scotland,15 to 24,Male,DALY rate,2,Yes,G
2016,Other chronic respiratory diseases,Scotland,25 to 44,Male,DALY rate,42.5,Yes,G
2016,Other chronic respiratory diseases,Scotland,45 to 64,Male,DALY rate,276.3,No,G
2016,Other chronic respiratory diseases,Scotland,65 to 84,Male,DALY rate,"1,367.30",No,G
2016,Other chronic respiratory diseases,Scotland,85 and over,Male,DALY rate,"2,398.80",No,G
2016,Other chronic respiratory diseases,Scotland,Under 15,Female,DALY rate,0.8,Yes,G
2016,Other chronic respiratory diseases,Scotland,15 to 24,Female,DALY rate,1.1,Yes,G
2016,Other chronic respiratory diseases,Scotland,25 to 44,Female,DALY rate,15.2,Yes,G
2016,Other chronic respiratory diseases,Scotland,45 to 64,Female,DALY rate,149.1,No,G
2016,Other chronic respiratory diseases,Scotland,65 to 84,Female,DALY rate,716.5,No,G
2016,Other chronic respiratory diseases,Scotland,85 and over,Female,DALY rate,824.9,No,G
2016,Other chronic respiratory diseases,Scotland,Under 15,Both sexes,DALY rate,0.8,Yes,G
2016,Other chronic respiratory diseases,Scotland,15 to 24,Both sexes,DALY rate,1.6,Yes,G
2016,Other chronic respiratory diseases,Scotland,25 to 44,Both sexes,DALY rate,28.7,No,G
2016,Other chronic respiratory diseases,Scotland,45 to 64,Both sexes,DALY rate,210.9,No,G
2016,Other chronic respiratory diseases,Scotland,65 to 84,Both sexes,DALY rate,"1,008.20",No,G
2016,Other chronic respiratory diseases,Scotland,85 and over,Both sexes,DALY rate,"1,354.10",No,G
2016,Alcohol use disorders,Scotland,Under 15,Male,DALY rate,0,Yes,A
2016,Alcohol use disorders,Scotland,15 to 24,Male,DALY rate,224.1,Yes,A
2016,Alcohol use disorders,Scotland,25 to 44,Male,DALY rate,"1,041.20",No,A
2016,Alcohol use disorders,Scotland,45 to 64,Male,DALY rate,"1,711.70",No,A
2016,Alcohol use disorders,Scotland,65 to 84,Male,DALY rate,"1,270.30",No,A
2016,Alcohol use disorders,Scotland,85 and over,Male,DALY rate,365.7,No,A
2016,Alcohol use disorders,Scotland,Under 15,Female,DALY rate,0,Yes,A
2016,Alcohol use disorders,Scotland,15 to 24,Female,DALY rate,99.7,Yes,A
2016,Alcohol use disorders,Scotland,25 to 44,Female,DALY rate,315.3,No,A
2016,Alcohol use disorders,Scotland,45 to 64,Female,DALY rate,583.2,No,A
2016,Alcohol use disorders,Scotland,65 to 84,Female,DALY rate,324.7,No,A
2016,Alcohol use disorders,Scotland,85 and over,Female,DALY rate,74,Yes,A
2016,Alcohol use disorders,Scotland,Under 15,Both sexes,DALY rate,0,Yes,A
2016,Alcohol use disorders,Scotland,15 to 24,Both sexes,DALY rate,162.4,Yes,A
2016,Alcohol use disorders,Scotland,25 to 44,Both sexes,DALY rate,671.5,No,A
2016,Alcohol use disorders,Scotland,45 to 64,Both sexes,DALY rate,"1,130.90",No,A
2016,Alcohol use disorders,Scotland,65 to 84,Both sexes,DALY rate,762.4,No,A
2016,Alcohol use disorders,Scotland,85 and over,Both sexes,DALY rate,176.4,No,A
2016,Drug use disorders,Scotland,Under 15,Male,DALY rate,2.9,Yes,A
2016,Drug use disorders,Scotland,15 to 24,Male,DALY rate,"1,311.00",No,A
2016,Drug use disorders,Scotland,25 to 44,Male,DALY rate,"4,369.60",No,A
2016,Drug use disorders,Scotland,45 to 64,Male,DALY rate,"1,361.30",No,A
2016,Drug use disorders,Scotland,65 to 84,Male,DALY rate,96.5,No,A
2016,Drug use disorders,Scotland,85 and over,Male,DALY rate,10.7,Yes,A
2016,Drug use disorders,Scotland,Under 15,Female,DALY rate,1.2,Yes,A
2016,Drug use disorders,Scotland,15 to 24,Female,DALY rate,635.6,No,A
2016,Drug use disorders,Scotland,25 to 44,Female,DALY rate,"1,594.70",No,A
2016,Drug use disorders,Scotland,45 to 64,Female,DALY rate,606,No,A
2016,Drug use disorders,Scotland,65 to 84,Female,DALY rate,32.4,Yes,A
2016,Drug use disorders,Scotland,85 and over,Female,DALY rate,20.2,Yes,A
2016,Drug use disorders,Scotland,Under 15,Both sexes,DALY rate,2,Yes,A
2016,Drug use disorders,Scotland,15 to 24,Both sexes,DALY rate,976.1,No,A
2016,Drug use disorders,Scotland,25 to 44,Both sexes,DALY rate,"2,958.10",No,A
2016,Drug use disorders,Scotland,45 to 64,Both sexes,DALY rate,971.9,No,A
2016,Drug use disorders,Scotland,65 to 84,Both sexes,DALY rate,62.8,No,A
2016,Drug use disorders,Scotland,85 and over,Both sexes,DALY rate,16.7,Yes,A
2016,Peptic ulcer disease,Scotland,Under 15,Male,DALY rate,19.4,Yes,G
2016,Peptic ulcer disease,Scotland,15 to 24,Male,DALY rate,0.4,Yes,G
2016,Peptic ulcer disease,Scotland,25 to 44,Male,DALY rate,13.8,Yes,G
2016,Peptic ulcer disease,Scotland,45 to 64,Male,DALY rate,133.5,No,G
2016,Peptic ulcer disease,Scotland,65 to 84,Male,DALY rate,375.9,No,G
2016,Peptic ulcer disease,Scotland,85 and over,Male,DALY rate,674.2,No,G
2016,Peptic ulcer disease,Scotland,Under 15,Female,DALY rate,0,Yes,G
2016,Peptic ulcer disease,Scotland,15 to 24,Female,DALY rate,0.2,Yes,G
2016,Peptic ulcer disease,Scotland,25 to 44,Female,DALY rate,1,Yes,G
2016,Peptic ulcer disease,Scotland,45 to 64,Female,DALY rate,60.6,No,G
2016,Peptic ulcer disease,Scotland,65 to 84,Female,DALY rate,224.3,No,G
2016,Peptic ulcer disease,Scotland,85 and over,Female,DALY rate,639.3,No,G
2016,Peptic ulcer disease,Scotland,Under 15,Both sexes,DALY rate,9.9,Yes,G
2016,Peptic ulcer disease,Scotland,15 to 24,Both sexes,DALY rate,0.3,Yes,G
2016,Peptic ulcer disease,Scotland,25 to 44,Both sexes,DALY rate,7.3,Yes,G
2016,Peptic ulcer disease,Scotland,45 to 64,Both sexes,DALY rate,96.1,No,G
2016,Peptic ulcer disease,Scotland,65 to 84,Both sexes,DALY rate,291.9,No,G
2016,Peptic ulcer disease,Scotland,85 and over,Both sexes,DALY rate,653,No,G
2016,Inflammatory bowel disease,Scotland,Under 15,Male,DALY rate,7.2,Yes,A
2016,Inflammatory bowel disease,Scotland,15 to 24,Male,DALY rate,51,Yes,A
2016,Inflammatory bowel disease,Scotland,25 to 44,Male,DALY rate,110.6,Yes,A
2016,Inflammatory bowel disease,Scotland,45 to 64,Male,DALY rate,154.3,No,A
2016,Inflammatory bowel disease,Scotland,65 to 84,Male,DALY rate,186.1,No,A
2016,Inflammatory bowel disease,Scotland,85 and over,Male,DALY rate,138.3,Yes,A
2016,Inflammatory bowel disease,Scotland,Under 15,Female,DALY rate,26.1,Yes,A
2016,Inflammatory bowel disease,Scotland,15 to 24,Female,DALY rate,58.9,Yes,A
2016,Inflammatory bowel disease,Scotland,25 to 44,Female,DALY rate,115.2,Yes,A
2016,Inflammatory bowel disease,Scotland,45 to 64,Female,DALY rate,154.2,Yes,A
2016,Inflammatory bowel disease,Scotland,65 to 84,Female,DALY rate,244,No,A
2016,Inflammatory bowel disease,Scotland,85 and over,Female,DALY rate,274.9,No,A
2016,Inflammatory bowel disease,Scotland,Under 15,Both sexes,DALY rate,16.4,Yes,A
2016,Inflammatory bowel disease,Scotland,15 to 24,Both sexes,DALY rate,55,Yes,A
2016,Inflammatory bowel disease,Scotland,25 to 44,Both sexes,DALY rate,113.1,Yes,A
2016,Inflammatory bowel disease,Scotland,45 to 64,Both sexes,DALY rate,154.2,No,A
2016,Inflammatory bowel disease,Scotland,65 to 84,Both sexes,DALY rate,217.9,No,A
2016,Inflammatory bowel disease,Scotland,85 and over,Both sexes,DALY rate,229.2,No,A
2016,Gallbladder and biliary diseases,Scotland,Under 15,Male,DALY rate,0.5,Yes,A
2016,Gallbladder and biliary diseases,Scotland,15 to 24,Male,DALY rate,3.5,Yes,A
2016,Gallbladder and biliary diseases,Scotland,25 to 44,Male,DALY rate,27.2,Yes,A
2016,Gallbladder and biliary diseases,Scotland,45 to 64,Male,DALY rate,98.2,No,A
2016,Gallbladder and biliary diseases,Scotland,65 to 84,Male,DALY rate,405.1,No,A
2016,Gallbladder and biliary diseases,Scotland,85 and over,Male,DALY rate,928.6,No,A
2016,Gallbladder and biliary diseases,Scotland,Under 15,Female,DALY rate,0.9,Yes,A
2016,Gallbladder and biliary diseases,Scotland,15 to 24,Female,DALY rate,27,Yes,A
2016,Gallbladder and biliary diseases,Scotland,25 to 44,Female,DALY rate,87.9,Yes,A
2016,Gallbladder and biliary diseases,Scotland,45 to 64,Female,DALY rate,159.1,No,A
2016,Gallbladder and biliary diseases,Scotland,65 to 84,Female,DALY rate,386.3,No,A
2016,Gallbladder and biliary diseases,Scotland,85 and over,Female,DALY rate,"1,320.80",No,A
2016,Gallbladder and biliary diseases,Scotland,Under 15,Both sexes,DALY rate,0.7,Yes,A
2016,Gallbladder and biliary diseases,Scotland,15 to 24,Both sexes,DALY rate,15.2,Yes,A
2016,Gallbladder and biliary diseases,Scotland,25 to 44,Both sexes,DALY rate,58,Yes,A
2016,Gallbladder and biliary diseases,Scotland,45 to 64,Both sexes,DALY rate,129.5,No,A
2016,Gallbladder and biliary diseases,Scotland,65 to 84,Both sexes,DALY rate,394,No,A
2016,Gallbladder and biliary diseases,Scotland,85 and over,Both sexes,DALY rate,"1,176.50",No,A
2016,Pancreatitis,Scotland,Under 15,Male,DALY rate,1.1,Yes,G
2016,Pancreatitis,Scotland,15 to 24,Male,DALY rate,3.8,Yes,G
2016,Pancreatitis,Scotland,25 to 44,Male,DALY rate,101.8,No,G
2016,Pancreatitis,Scotland,45 to 64,Male,DALY rate,211.8,No,G
2016,Pancreatitis,Scotland,65 to 84,Male,DALY rate,245.9,No,G
2016,Pancreatitis,Scotland,85 and over,Male,DALY rate,308.3,No,G
2016,Pancreatitis,Scotland,Under 15,Female,DALY rate,1.3,Yes,G
2016,Pancreatitis,Scotland,15 to 24,Female,DALY rate,3.5,Yes,G
2016,Pancreatitis,Scotland,25 to 44,Female,DALY rate,37.5,Yes,G
2016,Pancreatitis,Scotland,45 to 64,Female,DALY rate,88.3,No,G
2016,Pancreatitis,Scotland,65 to 84,Female,DALY rate,211.2,No,G
2016,Pancreatitis,Scotland,85 and over,Female,DALY rate,158.9,No,G
2016,Pancreatitis,Scotland,Under 15,Both sexes,DALY rate,1.2,Yes,G
2016,Pancreatitis,Scotland,15 to 24,Both sexes,DALY rate,3.6,Yes,G
2016,Pancreatitis,Scotland,25 to 44,Both sexes,DALY rate,69.1,No,G
2016,Pancreatitis,Scotland,45 to 64,Both sexes,DALY rate,148.3,No,G
2016,Pancreatitis,Scotland,65 to 84,Both sexes,DALY rate,227,No,G
2016,Pancreatitis,Scotland,85 and over,Both sexes,DALY rate,207.8,No,G
2016,Cirrhosis and other chronic liver diseases,Scotland,Under 15,Male,DALY rate,1.9,Yes,G
2016,Cirrhosis and other chronic liver diseases,Scotland,15 to 24,Male,DALY rate,4.4,Yes,G
2016,Cirrhosis and other chronic liver diseases,Scotland,25 to 44,Male,DALY rate,628.8,No,G
2016,Cirrhosis and other chronic liver diseases,Scotland,45 to 64,Male,DALY rate,"2,049.70",No,G
2016,Cirrhosis and other chronic liver diseases,Scotland,65 to 84,Male,DALY rate,"1,434.70",No,G
2016,Cirrhosis and other chronic liver diseases,Scotland,85 and over,Male,DALY rate,367.5,No,G
2016,Cirrhosis and other chronic liver diseases,Scotland,Under 15,Female,DALY rate,1.2,Yes,G
2016,Cirrhosis and other chronic liver diseases,Scotland,15 to 24,Female,DALY rate,4.7,Yes,G
2016,Cirrhosis and other chronic liver diseases,Scotland,25 to 44,Female,DALY rate,409.8,No,G
2016,Cirrhosis and other chronic liver diseases,Scotland,45 to 64,Female,DALY rate,"1,035.00",No,G
2016,Cirrhosis and other chronic liver diseases,Scotland,65 to 84,Female,DALY rate,752.9,No,G
2016,Cirrhosis and other chronic liver diseases,Scotland,85 and over,Female,DALY rate,199.8,No,G
2016,Cirrhosis and other chronic liver diseases,Scotland,Under 15,Both sexes,DALY rate,1.6,Yes,G
2016,Cirrhosis and other chronic liver diseases,Scotland,15 to 24,Both sexes,DALY rate,4.5,Yes,G
2016,Cirrhosis and other chronic liver diseases,Scotland,25 to 44,Both sexes,DALY rate,517.4,No,G
2016,Cirrhosis and other chronic liver diseases,Scotland,45 to 64,Both sexes,DALY rate,"1,528.00",No,G
2016,Cirrhosis and other chronic liver diseases,Scotland,65 to 84,Both sexes,DALY rate,"1,071.50",No,G
2016,Cirrhosis and other chronic liver diseases,Scotland,85 and over,Both sexes,DALY rate,256.8,No,G
2016,Other digestive diseases,Scotland,Under 15,Male,DALY rate,54.1,Yes,A
2016,Other digestive diseases,Scotland,15 to 24,Male,DALY rate,32.5,Yes,A
2016,Other digestive diseases,Scotland,25 to 44,Male,DALY rate,90,No,A
2016,Other digestive diseases,Scotland,45 to 64,Male,DALY rate,393,No,A
2016,Other digestive diseases,Scotland,65 to 84,Male,DALY rate,"1,250.90",No,A
2016,Other digestive diseases,Scotland,85 and over,Male,DALY rate,"2,727.70",No,A
2016,Other digestive diseases,Scotland,Under 15,Female,DALY rate,31.9,Yes,A
2016,Other digestive diseases,Scotland,15 to 24,Female,DALY rate,6.8,Yes,A
2016,Other digestive diseases,Scotland,25 to 44,Female,DALY rate,58.7,Yes,A
2016,Other digestive diseases,Scotland,45 to 64,Female,DALY rate,330.3,No,A
2016,Other digestive diseases,Scotland,65 to 84,Female,DALY rate,"1,424.50",No,A
2016,Other digestive diseases,Scotland,85 and over,Female,DALY rate,"3,276.60",No,A
2016,Other digestive diseases,Scotland,Under 15,Both sexes,DALY rate,43.2,Yes,A
2016,Other digestive diseases,Scotland,15 to 24,Both sexes,DALY rate,19.6,Yes,A
2016,Other digestive diseases,Scotland,25 to 44,Both sexes,DALY rate,74.1,No,A
2016,Other digestive diseases,Scotland,45 to 64,Both sexes,DALY rate,360.8,No,A
2016,Other digestive diseases,Scotland,65 to 84,Both sexes,DALY rate,"1,351.40",No,A
2016,Other digestive diseases,Scotland,85 and over,Both sexes,DALY rate,"3,085.50",No,A
2016,Alzheimer's disease and other dementias,Scotland,Under 15,Male,DALY rate,0.2,Yes,G
2016,Alzheimer's disease and other dementias,Scotland,15 to 24,Male,DALY rate,0.1,Yes,G
2016,Alzheimer's disease and other dementias,Scotland,25 to 44,Male,DALY rate,3.1,Yes,G
2016,Alzheimer's disease and other dementias,Scotland,45 to 64,Male,DALY rate,147.9,No,G
2016,Alzheimer's disease and other dementias,Scotland,65 to 84,Male,DALY rate,"4,770.20",No,G
2016,Alzheimer's disease and other dementias,Scotland,85 and over,Male,DALY rate,"28,220.40",No,G
2016,Alzheimer's disease and other dementias,Scotland,Under 15,Female,DALY rate,0.3,Yes,G
2016,Alzheimer's disease and other dementias,Scotland,15 to 24,Female,DALY rate,0,Yes,G
2016,Alzheimer's disease and other dementias,Scotland,25 to 44,Female,DALY rate,2.2,Yes,G
2016,Alzheimer's disease and other dementias,Scotland,45 to 64,Female,DALY rate,191.9,No,G
2016,Alzheimer's disease and other dementias,Scotland,65 to 84,Female,DALY rate,"4,980.30",No,G
2016,Alzheimer's disease and other dementias,Scotland,85 and over,Female,DALY rate,"34,489.40",No,G
2016,Alzheimer's disease and other dementias,Scotland,Under 15,Both sexes,DALY rate,0.3,Yes,G
2016,Alzheimer's disease and other dementias,Scotland,15 to 24,Both sexes,DALY rate,0,Yes,G
2016,Alzheimer's disease and other dementias,Scotland,25 to 44,Both sexes,DALY rate,2.7,Yes,G
2016,Alzheimer's disease and other dementias,Scotland,45 to 64,Both sexes,DALY rate,170.5,No,G
2016,Alzheimer's disease and other dementias,Scotland,65 to 84,Both sexes,DALY rate,"4,894.20",No,G
2016,Alzheimer's disease and other dementias,Scotland,85 and over,Both sexes,DALY rate,"32,528.50",No,G
2016,Parkinson's disease,Scotland,Under 15,Male,DALY rate,0.6,Yes,G
2016,Parkinson's disease,Scotland,15 to 24,Male,DALY rate,0,Yes,G
2016,Parkinson's disease,Scotland,25 to 44,Male,DALY rate,1,Yes,G
2016,Parkinson's disease,Scotland,45 to 64,Male,DALY rate,82.5,No,G
2016,Parkinson's disease,Scotland,65 to 84,Male,DALY rate,995.3,No,G
2016,Parkinson's disease,Scotland,85 and over,Male,DALY rate,"2,113.40",No,G
2016,Parkinson's disease,Scotland,Under 15,Female,DALY rate,0,Yes,G
2016,Parkinson's disease,Scotland,15 to 24,Female,DALY rate,0,Yes,G
2016,Parkinson's disease,Scotland,25 to 44,Female,DALY rate,0.5,Yes,G
2016,Parkinson's disease,Scotland,45 to 64,Female,DALY rate,45.4,No,G
2016,Parkinson's disease,Scotland,65 to 84,Female,DALY rate,436.9,No,G
2016,Parkinson's disease,Scotland,85 and over,Female,DALY rate,"1,104.00",No,G
2016,Parkinson's disease,Scotland,Under 15,Both sexes,DALY rate,0.3,Yes,G
2016,Parkinson's disease,Scotland,15 to 24,Both sexes,DALY rate,0,Yes,G
2016,Parkinson's disease,Scotland,25 to 44,Both sexes,DALY rate,0.7,Yes,G
2016,Parkinson's disease,Scotland,45 to 64,Both sexes,DALY rate,63.4,No,G
2016,Parkinson's disease,Scotland,65 to 84,Both sexes,DALY rate,682.1,No,G
2016,Parkinson's disease,Scotland,85 and over,Both sexes,DALY rate,"1,456.80",No,G
2016,Epilepsy,Scotland,Under 15,Male,DALY rate,76.3,Yes,A
2016,Epilepsy,Scotland,15 to 24,Male,DALY rate,378.3,No,A
2016,Epilepsy,Scotland,25 to 44,Male,DALY rate,329.8,No,A
2016,Epilepsy,Scotland,45 to 64,Male,DALY rate,369.5,No,A
2016,Epilepsy,Scotland,65 to 84,Male,DALY rate,338.5,No,A
2016,Epilepsy,Scotland,85 and over,Male,DALY rate,325.7,No,A
2016,Epilepsy,Scotland,Under 15,Female,DALY rate,118.6,Yes,A
2016,Epilepsy,Scotland,15 to 24,Female,DALY rate,147.8,Yes,A
2016,Epilepsy,Scotland,25 to 44,Female,DALY rate,237.9,No,A
2016,Epilepsy,Scotland,45 to 64,Female,DALY rate,336.4,No,A
2016,Epilepsy,Scotland,65 to 84,Female,DALY rate,299,No,A
2016,Epilepsy,Scotland,85 and over,Female,DALY rate,344,No,A
2016,Epilepsy,Scotland,Under 15,Both sexes,DALY rate,96.9,Yes,A
2016,Epilepsy,Scotland,15 to 24,Both sexes,DALY rate,265,No,A
2016,Epilepsy,Scotland,25 to 44,Both sexes,DALY rate,282.9,No,A
2016,Epilepsy,Scotland,45 to 64,Both sexes,DALY rate,352.5,No,A
2016,Epilepsy,Scotland,65 to 84,Both sexes,DALY rate,315.9,No,A
2016,Epilepsy,Scotland,85 and over,Both sexes,DALY rate,338.3,No,A
2016,Multiple sclerosis,Scotland,Under 15,Male,DALY rate,0.1,Yes,G
2016,Multiple sclerosis,Scotland,15 to 24,Male,DALY rate,2,Yes,G
2016,Multiple sclerosis,Scotland,25 to 44,Male,DALY rate,54.8,Yes,G
2016,Multiple sclerosis,Scotland,45 to 64,Male,DALY rate,217.5,No,G
2016,Multiple sclerosis,Scotland,65 to 84,Male,DALY rate,195.7,No,G
2016,Multiple sclerosis,Scotland,85 and over,Male,DALY rate,21.7,Yes,G
2016,Multiple sclerosis,Scotland,Under 15,Female,DALY rate,0,Yes,G
2016,Multiple sclerosis,Scotland,15 to 24,Female,DALY rate,6.1,Yes,G
2016,Multiple sclerosis,Scotland,25 to 44,Female,DALY rate,92.2,Yes,G
2016,Multiple sclerosis,Scotland,45 to 64,Female,DALY rate,414.4,No,G
2016,Multiple sclerosis,Scotland,65 to 84,Female,DALY rate,310.3,No,G
2016,Multiple sclerosis,Scotland,85 and over,Female,DALY rate,84.9,No,G
2016,Multiple sclerosis,Scotland,Under 15,Both sexes,DALY rate,0.1,Yes,G
2016,Multiple sclerosis,Scotland,15 to 24,Both sexes,DALY rate,4.1,Yes,G
2016,Multiple sclerosis,Scotland,25 to 44,Both sexes,DALY rate,73.8,No,G
2016,Multiple sclerosis,Scotland,45 to 64,Both sexes,DALY rate,318.7,No,G
2016,Multiple sclerosis,Scotland,65 to 84,Both sexes,DALY rate,257.6,No,G
2016,Multiple sclerosis,Scotland,85 and over,Both sexes,DALY rate,61.5,No,G
2016,Headache disorders,Scotland,Under 15,Male,DALY rate,283.8,Yes,R
2016,Headache disorders,Scotland,15 to 24,Male,DALY rate,745.7,Yes,R
2016,Headache disorders,Scotland,25 to 44,Male,DALY rate,853,Yes,R
2016,Headache disorders,Scotland,45 to 64,Male,DALY rate,713.4,Yes,R
2016,Headache disorders,Scotland,65 to 84,Male,DALY rate,385.7,Yes,R
2016,Headache disorders,Scotland,85 and over,Male,DALY rate,214.6,Yes,R
2016,Headache disorders,Scotland,Under 15,Female,DALY rate,315.8,Yes,R
2016,Headache disorders,Scotland,15 to 24,Female,DALY rate,"1,555.30",Yes,R
2016,Headache disorders,Scotland,25 to 44,Female,DALY rate,"2,105.70",Yes,R
2016,Headache disorders,Scotland,45 to 64,Female,DALY rate,"1,603.00",Yes,R
2016,Headache disorders,Scotland,65 to 84,Female,DALY rate,668.5,Yes,R
2016,Headache disorders,Scotland,85 and over,Female,DALY rate,263.6,Yes,R
2016,Headache disorders,Scotland,Under 15,Both sexes,DALY rate,299.4,Yes,R
2016,Headache disorders,Scotland,15 to 24,Both sexes,DALY rate,"1,148.10",Yes,R
2016,Headache disorders,Scotland,25 to 44,Both sexes,DALY rate,"1,489.80",Yes,R
2016,Headache disorders,Scotland,45 to 64,Both sexes,DALY rate,"1,171.50",Yes,R
2016,Headache disorders,Scotland,65 to 84,Both sexes,DALY rate,536.2,Yes,R
2016,Headache disorders,Scotland,85 and over,Both sexes,DALY rate,246.4,Yes,R
2016,Other neurological disorders,Scotland,Under 15,Male,DALY rate,92.7,Yes,G
2016,Other neurological disorders,Scotland,15 to 24,Male,DALY rate,131.4,No,G
2016,Other neurological disorders,Scotland,25 to 44,Male,DALY rate,85.8,No,G
2016,Other neurological disorders,Scotland,45 to 64,Male,DALY rate,323.4,No,G
2016,Other neurological disorders,Scotland,65 to 84,Male,DALY rate,637.4,No,G
2016,Other neurological disorders,Scotland,85 and over,Male,DALY rate,424.9,No,G
2016,Other neurological disorders,Scotland,Under 15,Female,DALY rate,22.4,Yes,G
2016,Other neurological disorders,Scotland,15 to 24,Female,DALY rate,1.5,Yes,G
2016,Other neurological disorders,Scotland,25 to 44,Female,DALY rate,48.2,No,G
2016,Other neurological disorders,Scotland,45 to 64,Female,DALY rate,234.1,No,G
2016,Other neurological disorders,Scotland,65 to 84,Female,DALY rate,440.6,No,G
2016,Other neurological disorders,Scotland,85 and over,Female,DALY rate,269.5,No,G
2016,Other neurological disorders,Scotland,Under 15,Both sexes,DALY rate,58.4,No,G
2016,Other neurological disorders,Scotland,15 to 24,Both sexes,DALY rate,66.9,No,G
2016,Other neurological disorders,Scotland,25 to 44,Both sexes,DALY rate,66.8,No,G
2016,Other neurological disorders,Scotland,45 to 64,Both sexes,DALY rate,277.5,No,G
2016,Other neurological disorders,Scotland,65 to 84,Both sexes,DALY rate,532.7,No,G
2016,Other neurological disorders,Scotland,85 and over,Both sexes,DALY rate,321.8,No,G
2016,Schizophrenia,Scotland,Under 15,Male,DALY rate,0.1,Yes,G
2016,Schizophrenia,Scotland,15 to 24,Male,DALY rate,65.4,Yes,G
2016,Schizophrenia,Scotland,25 to 44,Male,DALY rate,495,Yes,G
2016,Schizophrenia,Scotland,45 to 64,Male,DALY rate,505.5,No,G
2016,Schizophrenia,Scotland,65 to 84,Male,DALY rate,223.6,No,G
2016,Schizophrenia,Scotland,85 and over,Male,DALY rate,95.4,Yes,G
2016,Schizophrenia,Scotland,Under 15,Female,DALY rate,0.1,Yes,G
2016,Schizophrenia,Scotland,15 to 24,Female,DALY rate,19.5,Yes,G
2016,Schizophrenia,Scotland,25 to 44,Female,DALY rate,172.9,Yes,G
2016,Schizophrenia,Scotland,45 to 64,Female,DALY rate,274.6,Yes,G
2016,Schizophrenia,Scotland,65 to 84,Female,DALY rate,213.4,No,G
2016,Schizophrenia,Scotland,85 and over,Female,DALY rate,174.7,No,G
2016,Schizophrenia,Scotland,Under 15,Both sexes,DALY rate,0.1,Yes,G
2016,Schizophrenia,Scotland,15 to 24,Both sexes,DALY rate,42.5,Yes,G
2016,Schizophrenia,Scotland,25 to 44,Both sexes,DALY rate,331,Yes,G
2016,Schizophrenia,Scotland,45 to 64,Both sexes,DALY rate,386.5,No,G
2016,Schizophrenia,Scotland,65 to 84,Both sexes,DALY rate,218.9,No,G
2016,Schizophrenia,Scotland,85 and over,Both sexes,DALY rate,149.3,No,G
2016,Depression,Scotland,Under 15,Male,DALY rate,0,Yes,G
2016,Depression,Scotland,15 to 24,Male,DALY rate,752.8,Yes,G
2016,Depression,Scotland,25 to 44,Male,DALY rate,"1,730.80",Yes,G
2016,Depression,Scotland,45 to 64,Male,DALY rate,"1,800.20",Yes,G
2016,Depression,Scotland,65 to 84,Male,DALY rate,"1,279.00",Yes,G
2016,Depression,Scotland,85 and over,Male,DALY rate,"1,462.10",Yes,G
2016,Depression,Scotland,Under 15,Female,DALY rate,0,Yes,G
2016,Depression,Scotland,15 to 24,Female,DALY rate,803.3,Yes,G
2016,Depression,Scotland,25 to 44,Female,DALY rate,"1,594.10",Yes,G
2016,Depression,Scotland,45 to 64,Female,DALY rate,"1,761.10",Yes,G
2016,Depression,Scotland,65 to 84,Female,DALY rate,"1,213.80",Yes,G
2016,Depression,Scotland,85 and over,Female,DALY rate,"1,125.10",Yes,G
2016,Depression,Scotland,Under 15,Both sexes,DALY rate,0,Yes,G
2016,Depression,Scotland,15 to 24,Both sexes,DALY rate,777.2,Yes,G
2016,Depression,Scotland,25 to 44,Both sexes,DALY rate,"1,661.20",Yes,G
2016,Depression,Scotland,45 to 64,Both sexes,DALY rate,"1,780.00",Yes,G
2016,Depression,Scotland,65 to 84,Both sexes,DALY rate,"1,243.00",Yes,G
2016,Depression,Scotland,85 and over,Both sexes,DALY rate,"1,231.70",Yes,G
2016,Anxiety disorders,Scotland,Under 15,Male,DALY rate,0,Yes,G
2016,Anxiety disorders,Scotland,15 to 24,Male,DALY rate,360.9,Yes,G
2016,Anxiety disorders,Scotland,25 to 44,Male,DALY rate,828.5,Yes,G
2016,Anxiety disorders,Scotland,45 to 64,Male,DALY rate,932,Yes,G
2016,Anxiety disorders,Scotland,65 to 84,Male,DALY rate,702.6,Yes,G
2016,Anxiety disorders,Scotland,85 and over,Male,DALY rate,743.6,Yes,G
2016,Anxiety disorders,Scotland,Under 15,Female,DALY rate,0,Yes,G
2016,Anxiety disorders,Scotland,15 to 24,Female,DALY rate,661.5,Yes,G
2016,Anxiety disorders,Scotland,25 to 44,Female,DALY rate,"1,325.60",Yes,G
2016,Anxiety disorders,Scotland,45 to 64,Female,DALY rate,"1,534.70",Yes,G
2016,Anxiety disorders,Scotland,65 to 84,Female,DALY rate,"1,107.70",Yes,G
2016,Anxiety disorders,Scotland,85 and over,Female,DALY rate,955.4,Yes,G
2016,Anxiety disorders,Scotland,Under 15,Both sexes,DALY rate,0,Yes,G
2016,Anxiety disorders,Scotland,15 to 24,Both sexes,DALY rate,510,Yes,G
2016,Anxiety disorders,Scotland,25 to 44,Both sexes,DALY rate,"1,081.30",Yes,G
2016,Anxiety disorders,Scotland,45 to 64,Both sexes,DALY rate,"1,242.10",Yes,G
2016,Anxiety disorders,Scotland,65 to 84,Both sexes,DALY rate,921.4,Yes,G
2016,Anxiety disorders,Scotland,85 and over,Both sexes,DALY rate,879.1,Yes,G
2016,Other mental health disorders,Scotland,Under 15,Male,DALY rate,251.3,Yes,R
2016,Other mental health disorders,Scotland,15 to 24,Male,DALY rate,199.5,Yes,R
2016,Other mental health disorders,Scotland,25 to 44,Male,DALY rate,172.7,Yes,R
2016,Other mental health disorders,Scotland,45 to 64,Male,DALY rate,153.5,Yes,R
2016,Other mental health disorders,Scotland,65 to 84,Male,DALY rate,126.9,Yes,R
2016,Other mental health disorders,Scotland,85 and over,Male,DALY rate,426.1,No,R
2016,Other mental health disorders,Scotland,Under 15,Female,DALY rate,89.2,Yes,R
2016,Other mental health disorders,Scotland,15 to 24,Female,DALY rate,184.8,Yes,R
2016,Other mental health disorders,Scotland,25 to 44,Female,DALY rate,249.7,Yes,R
2016,Other mental health disorders,Scotland,45 to 64,Female,DALY rate,166.3,Yes,R
2016,Other mental health disorders,Scotland,65 to 84,Female,DALY rate,137.9,Yes,R
2016,Other mental health disorders,Scotland,85 and over,Female,DALY rate,460.6,No,R
2016,Other mental health disorders,Scotland,Under 15,Both sexes,DALY rate,172.1,Yes,R
2016,Other mental health disorders,Scotland,15 to 24,Both sexes,DALY rate,192.4,Yes,R
2016,Other mental health disorders,Scotland,25 to 44,Both sexes,DALY rate,211.8,No,R
2016,Other mental health disorders,Scotland,45 to 64,Both sexes,DALY rate,160.1,Yes,R
2016,Other mental health disorders,Scotland,65 to 84,Both sexes,DALY rate,132.7,Yes,R
2016,Other mental health disorders,Scotland,85 and over,Both sexes,DALY rate,451.3,No,R
2016,Diabetes mellitus,Scotland,Under 15,Male,DALY rate,18.1,Yes,G
2016,Diabetes mellitus,Scotland,15 to 24,Male,DALY rate,79.4,Yes,G
2016,Diabetes mellitus,Scotland,25 to 44,Male,DALY rate,351.9,No,G
2016,Diabetes mellitus,Scotland,45 to 64,Male,DALY rate,"1,098.70",No,G
2016,Diabetes mellitus,Scotland,65 to 84,Male,DALY rate,"2,370.00",No,G
2016,Diabetes mellitus,Scotland,85 and over,Male,DALY rate,"3,245.80",No,G
2016,Diabetes mellitus,Scotland,Under 15,Female,DALY rate,18.9,Yes,G
2016,Diabetes mellitus,Scotland,15 to 24,Female,DALY rate,54.5,Yes,G
2016,Diabetes mellitus,Scotland,25 to 44,Female,DALY rate,201.8,No,G
2016,Diabetes mellitus,Scotland,45 to 64,Female,DALY rate,715.8,No,G
2016,Diabetes mellitus,Scotland,65 to 84,Female,DALY rate,"1,694.50",No,G
2016,Diabetes mellitus,Scotland,85 and over,Female,DALY rate,"2,203.10",No,G
2016,Diabetes mellitus,Scotland,Under 15,Both sexes,DALY rate,18.5,Yes,G
2016,Diabetes mellitus,Scotland,15 to 24,Both sexes,DALY rate,67,Yes,G
2016,Diabetes mellitus,Scotland,25 to 44,Both sexes,DALY rate,275.4,No,G
2016,Diabetes mellitus,Scotland,45 to 64,Both sexes,DALY rate,901.8,No,G
2016,Diabetes mellitus,Scotland,65 to 84,Both sexes,DALY rate,"2,004.20",No,G
2016,Diabetes mellitus,Scotland,85 and over,Both sexes,DALY rate,"2,554.70",No,G
2016,Chronic kidney disease,Scotland,Under 15,Male,DALY rate,0.3,Yes,A
2016,Chronic kidney disease,Scotland,15 to 24,Male,DALY rate,1.3,Yes,A
2016,Chronic kidney disease,Scotland,25 to 44,Male,DALY rate,54.4,No,A
2016,Chronic kidney disease,Scotland,45 to 64,Male,DALY rate,284.2,No,A
2016,Chronic kidney disease,Scotland,65 to 84,Male,DALY rate,"1,311.20",No,A
2016,Chronic kidney disease,Scotland,85 and over,Male,DALY rate,"4,635.60",No,A
2016,Chronic kidney disease,Scotland,Under 15,Female,DALY rate,0.3,Yes,A
2016,Chronic kidney disease,Scotland,15 to 24,Female,DALY rate,25.8,Yes,A
2016,Chronic kidney disease,Scotland,25 to 44,Female,DALY rate,62.1,No,A
2016,Chronic kidney disease,Scotland,45 to 64,Female,DALY rate,218.2,No,A
2016,Chronic kidney disease,Scotland,65 to 84,Female,DALY rate,"1,270.80",No,A
2016,Chronic kidney disease,Scotland,85 and over,Female,DALY rate,"3,899.20",No,A
2016,Chronic kidney disease,Scotland,Under 15,Both sexes,DALY rate,0.3,Yes,A
2016,Chronic kidney disease,Scotland,15 to 24,Both sexes,DALY rate,13.3,Yes,A
2016,Chronic kidney disease,Scotland,25 to 44,Both sexes,DALY rate,58.2,No,A
2016,Chronic kidney disease,Scotland,45 to 64,Both sexes,DALY rate,250.3,No,A
2016,Chronic kidney disease,Scotland,65 to 84,Both sexes,DALY rate,"1,292.10",No,A
2016,Chronic kidney disease,Scotland,85 and over,Both sexes,DALY rate,"4,136.80",No,A
2016,Other diabetes and chronic kidney disorders,Scotland,Under 15,Male,DALY rate,0,Yes,R
2016,Other diabetes and chronic kidney disorders,Scotland,15 to 24,Male,DALY rate,0,Yes,R
2016,Other diabetes and chronic kidney disorders,Scotland,25 to 44,Male,DALY rate,0,Yes,R
2016,Other diabetes and chronic kidney disorders,Scotland,45 to 64,Male,DALY rate,4.4,Yes,R
2016,Other diabetes and chronic kidney disorders,Scotland,65 to 84,Male,DALY rate,18.4,Yes,R
2016,Other diabetes and chronic kidney disorders,Scotland,85 and over,Male,DALY rate,0.1,Yes,R
2016,Other diabetes and chronic kidney disorders,Scotland,Under 15,Female,DALY rate,0,Yes,R
2016,Other diabetes and chronic kidney disorders,Scotland,15 to 24,Female,DALY rate,0,Yes,R
2016,Other diabetes and chronic kidney disorders,Scotland,25 to 44,Female,DALY rate,0,Yes,R
2016,Other diabetes and chronic kidney disorders,Scotland,45 to 64,Female,DALY rate,0,Yes,R
2016,Other diabetes and chronic kidney disorders,Scotland,65 to 84,Female,DALY rate,0,Yes,R
2016,Other diabetes and chronic kidney disorders,Scotland,85 and over,Female,DALY rate,14.1,Yes,R
2016,Other diabetes and chronic kidney disorders,Scotland,Under 15,Both sexes,DALY rate,0,Yes,R
2016,Other diabetes and chronic kidney disorders,Scotland,15 to 24,Both sexes,DALY rate,0,Yes,R
2016,Other diabetes and chronic kidney disorders,Scotland,25 to 44,Both sexes,DALY rate,0,Yes,R
2016,Other diabetes and chronic kidney disorders,Scotland,45 to 64,Both sexes,DALY rate,2.1,Yes,R
2016,Other diabetes and chronic kidney disorders,Scotland,65 to 84,Both sexes,DALY rate,8.4,Yes,R
2016,Other diabetes and chronic kidney disorders,Scotland,85 and over,Both sexes,DALY rate,9.3,Yes,R
2016,Rheumatoid arthritis,Scotland,Under 15,Male,DALY rate,0.5,Yes,A
2016,Rheumatoid arthritis,Scotland,15 to 24,Male,DALY rate,12.3,Yes,A
2016,Rheumatoid arthritis,Scotland,25 to 44,Male,DALY rate,50.7,Yes,A
2016,Rheumatoid arthritis,Scotland,45 to 64,Male,DALY rate,178.8,No,A
2016,Rheumatoid arthritis,Scotland,65 to 84,Male,DALY rate,375.3,No,A
2016,Rheumatoid arthritis,Scotland,85 and over,Male,DALY rate,227.4,No,A
2016,Rheumatoid arthritis,Scotland,Under 15,Female,DALY rate,4.8,Yes,A
2016,Rheumatoid arthritis,Scotland,15 to 24,Female,DALY rate,39.8,Yes,A
2016,Rheumatoid arthritis,Scotland,25 to 44,Female,DALY rate,141.7,Yes,A
2016,Rheumatoid arthritis,Scotland,45 to 64,Female,DALY rate,380.9,No,A
2016,Rheumatoid arthritis,Scotland,65 to 84,Female,DALY rate,658.1,No,A
2016,Rheumatoid arthritis,Scotland,85 and over,Female,DALY rate,487.5,No,A
2016,Rheumatoid arthritis,Scotland,Under 15,Both sexes,DALY rate,2.6,Yes,A
2016,Rheumatoid arthritis,Scotland,15 to 24,Both sexes,DALY rate,26,Yes,A
2016,Rheumatoid arthritis,Scotland,25 to 44,Both sexes,DALY rate,97.1,Yes,A
2016,Rheumatoid arthritis,Scotland,45 to 64,Both sexes,DALY rate,282.6,No,A
2016,Rheumatoid arthritis,Scotland,65 to 84,Both sexes,DALY rate,531.6,No,A
2016,Rheumatoid arthritis,Scotland,85 and over,Both sexes,DALY rate,400,No,A
2016,Osteoarthritis,Scotland,Under 15,Male,DALY rate,0.9,Yes,A
2016,Osteoarthritis,Scotland,15 to 24,Male,DALY rate,1.4,Yes,A
2016,Osteoarthritis,Scotland,25 to 44,Male,DALY rate,62.6,Yes,A
2016,Osteoarthritis,Scotland,45 to 64,Male,DALY rate,507.2,Yes,A
2016,Osteoarthritis,Scotland,65 to 84,Male,DALY rate,865.6,Yes,A
2016,Osteoarthritis,Scotland,85 and over,Male,DALY rate,551.9,Yes,A
2016,Osteoarthritis,Scotland,Under 15,Female,DALY rate,0,Yes,A
2016,Osteoarthritis,Scotland,15 to 24,Female,DALY rate,3.2,Yes,A
2016,Osteoarthritis,Scotland,25 to 44,Female,DALY rate,79.6,Yes,A
2016,Osteoarthritis,Scotland,45 to 64,Female,DALY rate,769.6,Yes,A
2016,Osteoarthritis,Scotland,65 to 84,Female,DALY rate,"1,254.30",Yes,A
2016,Osteoarthritis,Scotland,85 and over,Female,DALY rate,743.7,Yes,A
2016,Osteoarthritis,Scotland,Under 15,Both sexes,DALY rate,0.5,Yes,A
2016,Osteoarthritis,Scotland,15 to 24,Both sexes,DALY rate,2.3,Yes,A
2016,Osteoarthritis,Scotland,25 to 44,Both sexes,DALY rate,71.3,Yes,A
2016,Osteoarthritis,Scotland,45 to 64,Both sexes,DALY rate,642.1,Yes,A
2016,Osteoarthritis,Scotland,65 to 84,Both sexes,DALY rate,"1,076.70",Yes,A
2016,Osteoarthritis,Scotland,85 and over,Both sexes,DALY rate,678.3,Yes,A
2016,Low back and neck pain,Scotland,Under 15,Male,DALY rate,154.3,Yes,A
2016,Low back and neck pain,Scotland,15 to 24,Male,DALY rate,668.2,Yes,A
2016,Low back and neck pain,Scotland,25 to 44,Male,DALY rate,"1,195.10",Yes,A
2016,Low back and neck pain,Scotland,45 to 64,Male,DALY rate,"1,428.60",Yes,A
2016,Low back and neck pain,Scotland,65 to 84,Male,DALY rate,"1,422.00",Yes,A
2016,Low back and neck pain,Scotland,85 and over,Male,DALY rate,"1,456.20",Yes,A
2016,Low back and neck pain,Scotland,Under 15,Female,DALY rate,186.4,Yes,A
2016,Low back and neck pain,Scotland,15 to 24,Female,DALY rate,"1,050.00",Yes,A
2016,Low back and neck pain,Scotland,25 to 44,Female,DALY rate,"1,759.40",Yes,A
2016,Low back and neck pain,Scotland,45 to 64,Female,DALY rate,"1,840.90",Yes,A
2016,Low back and neck pain,Scotland,65 to 84,Female,DALY rate,"1,800.90",Yes,A
2016,Low back and neck pain,Scotland,85 and over,Female,DALY rate,"1,680.50",Yes,A
2016,Low back and neck pain,Scotland,Under 15,Both sexes,DALY rate,170,Yes,A
2016,Low back and neck pain,Scotland,15 to 24,Both sexes,DALY rate,857.6,Yes,A
2016,Low back and neck pain,Scotland,25 to 44,Both sexes,DALY rate,"1,482.10",Yes,A
2016,Low back and neck pain,Scotland,45 to 64,Both sexes,DALY rate,"1,640.80",Yes,A
2016,Low back and neck pain,Scotland,65 to 84,Both sexes,DALY rate,"1,628.00",Yes,A
2016,Low back and neck pain,Scotland,85 and over,Both sexes,DALY rate,"1,600.40",Yes,A
2016,Other musculoskeletal disorders,Scotland,Under 15,Male,DALY rate,87.6,Yes,R
2016,Other musculoskeletal disorders,Scotland,15 to 24,Male,DALY rate,250.3,Yes,R
2016,Other musculoskeletal disorders,Scotland,25 to 44,Male,DALY rate,317.4,Yes,R
2016,Other musculoskeletal disorders,Scotland,45 to 64,Male,DALY rate,503.9,No,R
2016,Other musculoskeletal disorders,Scotland,65 to 84,Male,DALY rate,592.9,No,R
2016,Other musculoskeletal disorders,Scotland,85 and over,Male,DALY rate,976.3,No,R
2016,Other musculoskeletal disorders,Scotland,Under 15,Female,DALY rate,78.9,Yes,R
2016,Other musculoskeletal disorders,Scotland,15 to 24,Female,DALY rate,269,Yes,R
2016,Other musculoskeletal disorders,Scotland,25 to 44,Female,DALY rate,385.3,Yes,R
2016,Other musculoskeletal disorders,Scotland,45 to 64,Female,DALY rate,584.6,No,R
2016,Other musculoskeletal disorders,Scotland,65 to 84,Female,DALY rate,684.2,No,R
2016,Other musculoskeletal disorders,Scotland,85 and over,Female,DALY rate,"1,501.10",No,R
2016,Other musculoskeletal disorders,Scotland,Under 15,Both sexes,DALY rate,83.3,Yes,R
2016,Other musculoskeletal disorders,Scotland,15 to 24,Both sexes,DALY rate,259.7,Yes,R
2016,Other musculoskeletal disorders,Scotland,25 to 44,Both sexes,DALY rate,351.9,Yes,R
2016,Other musculoskeletal disorders,Scotland,45 to 64,Both sexes,DALY rate,545.4,No,R
2016,Other musculoskeletal disorders,Scotland,65 to 84,Both sexes,DALY rate,644.4,No,R
2016,Other musculoskeletal disorders,Scotland,85 and over,Both sexes,DALY rate,"1,327.80",No,R
2016,Congenital birth defects,Scotland,Under 15,Male,DALY rate,"1,077.30",No,A
2016,Congenital birth defects,Scotland,15 to 24,Male,DALY rate,373.1,No,A
2016,Congenital birth defects,Scotland,25 to 44,Male,DALY rate,226.7,No,A
2016,Congenital birth defects,Scotland,45 to 64,Male,DALY rate,195.4,No,A
2016,Congenital birth defects,Scotland,65 to 84,Male,DALY rate,164.1,No,A
2016,Congenital birth defects,Scotland,85 and over,Male,DALY rate,81.9,Yes,A
2016,Congenital birth defects,Scotland,Under 15,Female,DALY rate,846.6,No,A
2016,Congenital birth defects,Scotland,15 to 24,Female,DALY rate,326.3,No,A
2016,Congenital birth defects,Scotland,25 to 44,Female,DALY rate,118.7,Yes,A
2016,Congenital birth defects,Scotland,45 to 64,Female,DALY rate,242.4,No,A
2016,Congenital birth defects,Scotland,65 to 84,Female,DALY rate,126.1,No,A
2016,Congenital birth defects,Scotland,85 and over,Female,DALY rate,57.9,Yes,A
2016,Congenital birth defects,Scotland,Under 15,Both sexes,DALY rate,965,No,A
2016,Congenital birth defects,Scotland,15 to 24,Both sexes,DALY rate,350.8,No,A
2016,Congenital birth defects,Scotland,25 to 44,Both sexes,DALY rate,171.9,No,A
2016,Congenital birth defects,Scotland,45 to 64,Both sexes,DALY rate,219.6,No,A
2016,Congenital birth defects,Scotland,65 to 84,Both sexes,DALY rate,144.6,No,A
2016,Congenital birth defects,Scotland,85 and over,Both sexes,DALY rate,67.1,Yes,A
2016,Urinary diseases and male infertility,Scotland,Under 15,Male,DALY rate,0.2,Yes,A
2016,Urinary diseases and male infertility,Scotland,15 to 24,Male,DALY rate,2,Yes,A
2016,Urinary diseases and male infertility,Scotland,25 to 44,Male,DALY rate,16.4,Yes,A
2016,Urinary diseases and male infertility,Scotland,45 to 64,Male,DALY rate,294.5,No,A
2016,Urinary diseases and male infertility,Scotland,65 to 84,Male,DALY rate,"1,084.50",No,A
2016,Urinary diseases and male infertility,Scotland,85 and over,Male,DALY rate,"2,882.30",No,A
2016,Urinary diseases and male infertility,Scotland,Under 15,Female,DALY rate,0.8,Yes,A
2016,Urinary diseases and male infertility,Scotland,15 to 24,Female,DALY rate,2.5,Yes,A
2016,Urinary diseases and male infertility,Scotland,25 to 44,Female,DALY rate,27.4,Yes,A
2016,Urinary diseases and male infertility,Scotland,45 to 64,Female,DALY rate,74,No,A
2016,Urinary diseases and male infertility,Scotland,65 to 84,Female,DALY rate,492.2,No,A
2016,Urinary diseases and male infertility,Scotland,85 and over,Female,DALY rate,"1,912.00",No,A
2016,Urinary diseases and male infertility,Scotland,Under 15,Both sexes,DALY rate,0.5,Yes,A
2016,Urinary diseases and male infertility,Scotland,15 to 24,Both sexes,DALY rate,2.2,Yes,A
2016,Urinary diseases and male infertility,Scotland,25 to 44,Both sexes,DALY rate,22,Yes,A
2016,Urinary diseases and male infertility,Scotland,45 to 64,Both sexes,DALY rate,181.2,No,A
2016,Urinary diseases and male infertility,Scotland,65 to 84,Both sexes,DALY rate,765.8,No,A
2016,Urinary diseases and male infertility,Scotland,85 and over,Both sexes,DALY rate,"2,240.00",No,A
2016,Oral disorders,Scotland,Under 15,Male,DALY rate,16.9,Yes,A
2016,Oral disorders,Scotland,15 to 24,Male,DALY rate,39.1,Yes,A
2016,Oral disorders,Scotland,25 to 44,Male,DALY rate,57.3,Yes,A
2016,Oral disorders,Scotland,45 to 64,Male,DALY rate,177.4,Yes,A
2016,Oral disorders,Scotland,65 to 84,Male,DALY rate,569.6,Yes,A
2016,Oral disorders,Scotland,85 and over,Male,DALY rate,868.2,Yes,A
2016,Oral disorders,Scotland,Under 15,Female,DALY rate,16.9,Yes,A
2016,Oral disorders,Scotland,15 to 24,Female,DALY rate,53.2,Yes,A
2016,Oral disorders,Scotland,25 to 44,Female,DALY rate,76.5,Yes,A
2016,Oral disorders,Scotland,45 to 64,Female,DALY rate,194.8,Yes,A
2016,Oral disorders,Scotland,65 to 84,Female,DALY rate,607.6,Yes,A
2016,Oral disorders,Scotland,85 and over,Female,DALY rate,"1,226.60",Yes,A
2016,Oral disorders,Scotland,Under 15,Both sexes,DALY rate,16.9,Yes,A
2016,Oral disorders,Scotland,15 to 24,Both sexes,DALY rate,46.1,Yes,A
2016,Oral disorders,Scotland,25 to 44,Both sexes,DALY rate,67.1,Yes,A
2016,Oral disorders,Scotland,45 to 64,Both sexes,DALY rate,186.3,Yes,A
2016,Oral disorders,Scotland,65 to 84,Both sexes,DALY rate,591.5,Yes,A
2016,Oral disorders,Scotland,85 and over,Both sexes,DALY rate,"1,106.70",Yes,A
2016,Sudden infant death syndrome,Scotland,Under 15,Male,DALY rate,192.9,No,G
2016,Sudden infant death syndrome,Scotland,15 to 24,Male,DALY rate,0,Yes,G
2016,Sudden infant death syndrome,Scotland,25 to 44,Male,DALY rate,0,Yes,G
2016,Sudden infant death syndrome,Scotland,45 to 64,Male,DALY rate,0,Yes,G
2016,Sudden infant death syndrome,Scotland,65 to 84,Male,DALY rate,0,Yes,G
2016,Sudden infant death syndrome,Scotland,85 and over,Male,DALY rate,0,Yes,G
2016,Sudden infant death syndrome,Scotland,Under 15,Female,DALY rate,121.4,No,G
2016,Sudden infant death syndrome,Scotland,15 to 24,Female,DALY rate,0,Yes,G
2016,Sudden infant death syndrome,Scotland,25 to 44,Female,DALY rate,0,Yes,G
2016,Sudden infant death syndrome,Scotland,45 to 64,Female,DALY rate,0,Yes,G
2016,Sudden infant death syndrome,Scotland,65 to 84,Female,DALY rate,0,Yes,G
2016,Sudden infant death syndrome,Scotland,85 and over,Female,DALY rate,0,Yes,G
2016,Sudden infant death syndrome,Scotland,Under 15,Both sexes,DALY rate,158.1,No,G
2016,Sudden infant death syndrome,Scotland,15 to 24,Both sexes,DALY rate,0,Yes,G
2016,Sudden infant death syndrome,Scotland,25 to 44,Both sexes,DALY rate,0,Yes,G
2016,Sudden infant death syndrome,Scotland,45 to 64,Both sexes,DALY rate,0,Yes,G
2016,Sudden infant death syndrome,Scotland,65 to 84,Both sexes,DALY rate,0,Yes,G
2016,Sudden infant death syndrome,Scotland,85 and over,Both sexes,DALY rate,0,Yes,G
2016,Gynecological diseases,Scotland,Under 15,Male,DALY rate,1,Yes,R
2016,Gynecological diseases,Scotland,15 to 24,Male,DALY rate,1,Yes,R
2016,Gynecological diseases,Scotland,25 to 44,Male,DALY rate,0.9,Yes,R
2016,Gynecological diseases,Scotland,45 to 64,Male,DALY rate,0.8,Yes,R
2016,Gynecological diseases,Scotland,65 to 84,Male,DALY rate,1.1,Yes,R
2016,Gynecological diseases,Scotland,85 and over,Male,DALY rate,0.8,Yes,R
2016,Gynecological diseases,Scotland,Under 15,Female,DALY rate,17.9,Yes,R
2016,Gynecological diseases,Scotland,15 to 24,Female,DALY rate,437.2,Yes,R
2016,Gynecological diseases,Scotland,25 to 44,Female,DALY rate,693.8,Yes,R
2016,Gynecological diseases,Scotland,45 to 64,Female,DALY rate,459.4,Yes,R
2016,Gynecological diseases,Scotland,65 to 84,Female,DALY rate,103.8,No,R
2016,Gynecological diseases,Scotland,85 and over,Female,DALY rate,128.3,No,R
2016,Gynecological diseases,Scotland,Under 15,Both sexes,DALY rate,9.2,Yes,R
2016,Gynecological diseases,Scotland,15 to 24,Both sexes,DALY rate,218.1,Yes,R
2016,Gynecological diseases,Scotland,25 to 44,Both sexes,DALY rate,353.1,Yes,R
2016,Gynecological diseases,Scotland,45 to 64,Both sexes,DALY rate,237.1,Yes,R
2016,Gynecological diseases,Scotland,65 to 84,Both sexes,DALY rate,57,No,R
2016,Gynecological diseases,Scotland,85 and over,Both sexes,DALY rate,85,No,R
2016,"Endocrine, metabolic, blood, and immune disorders",Scotland,Under 15,Male,DALY rate,78.1,Yes,R
2016,"Endocrine, metabolic, blood, and immune disorders",Scotland,15 to 24,Male,DALY rate,139.4,No,R
2016,"Endocrine, metabolic, blood, and immune disorders",Scotland,25 to 44,Male,DALY rate,196.6,No,R
2016,"Endocrine, metabolic, blood, and immune disorders",Scotland,45 to 64,Male,DALY rate,362.5,No,R
2016,"Endocrine, metabolic, blood, and immune disorders",Scotland,65 to 84,Male,DALY rate,572.2,No,R
2016,"Endocrine, metabolic, blood, and immune disorders",Scotland,85 and over,Male,DALY rate,705.8,No,R
2016,"Endocrine, metabolic, blood, and immune disorders",Scotland,Under 15,Female,DALY rate,132.2,No,R
2016,"Endocrine, metabolic, blood, and immune disorders",Scotland,15 to 24,Female,DALY rate,153.6,Yes,R
2016,"Endocrine, metabolic, blood, and immune disorders",Scotland,25 to 44,Female,DALY rate,198.2,No,R
2016,"Endocrine, metabolic, blood, and immune disorders",Scotland,45 to 64,Female,DALY rate,403.9,No,R
2016,"Endocrine, metabolic, blood, and immune disorders",Scotland,65 to 84,Female,DALY rate,785,No,R
2016,"Endocrine, metabolic, blood, and immune disorders",Scotland,85 and over,Female,DALY rate,"1,443.50",No,R
2016,"Endocrine, metabolic, blood, and immune disorders",Scotland,Under 15,Both sexes,DALY rate,104.4,No,R
2016,"Endocrine, metabolic, blood, and immune disorders",Scotland,15 to 24,Both sexes,DALY rate,146.5,No,R
2016,"Endocrine, metabolic, blood, and immune disorders",Scotland,25 to 44,Both sexes,DALY rate,197.5,No,R
2016,"Endocrine, metabolic, blood, and immune disorders",Scotland,45 to 64,Both sexes,DALY rate,384,No,R
2016,"Endocrine, metabolic, blood, and immune disorders",Scotland,65 to 84,Both sexes,DALY rate,688.2,No,R
2016,"Endocrine, metabolic, blood, and immune disorders",Scotland,85 and over,Both sexes,DALY rate,"1,199.10",No,R
2016,Transport injuries,Scotland,Under 15,Male,DALY rate,106.1,No,G
2016,Transport injuries,Scotland,15 to 24,Male,DALY rate,641.3,No,G
2016,Transport injuries,Scotland,25 to 44,Male,DALY rate,408.7,No,G
2016,Transport injuries,Scotland,45 to 64,Male,DALY rate,220.7,No,G
2016,Transport injuries,Scotland,65 to 84,Male,DALY rate,126.5,No,G
2016,Transport injuries,Scotland,85 and over,Male,DALY rate,126.1,Yes,G
2016,Transport injuries,Scotland,Under 15,Female,DALY rate,130.6,No,G
2016,Transport injuries,Scotland,15 to 24,Female,DALY rate,223,No,G
2016,Transport injuries,Scotland,25 to 44,Female,DALY rate,114,No,G
2016,Transport injuries,Scotland,45 to 64,Female,DALY rate,87.3,No,G
2016,Transport injuries,Scotland,65 to 84,Female,DALY rate,56,No,G
2016,Transport injuries,Scotland,85 and over,Female,DALY rate,93,No,G
2016,Transport injuries,Scotland,Under 15,Both sexes,DALY rate,118,No,G
2016,Transport injuries,Scotland,15 to 24,Both sexes,DALY rate,433.3,No,G
2016,Transport injuries,Scotland,25 to 44,Both sexes,DALY rate,258.9,No,G
2016,Transport injuries,Scotland,45 to 64,Both sexes,DALY rate,152.1,No,G
2016,Transport injuries,Scotland,65 to 84,Both sexes,DALY rate,87.3,No,G
2016,Transport injuries,Scotland,85 and over,Both sexes,DALY rate,104.7,No,G
2016,Falls,Scotland,Under 15,Male,DALY rate,99,Yes,G
2016,Falls,Scotland,15 to 24,Male,DALY rate,193.5,Yes,G
2016,Falls,Scotland,25 to 44,Male,DALY rate,185.9,No,G
2016,Falls,Scotland,45 to 64,Male,DALY rate,270,No,G
2016,Falls,Scotland,65 to 84,Male,DALY rate,"1,095.80",No,G
2016,Falls,Scotland,85 and over,Male,DALY rate,"4,852.10",No,G
2016,Falls,Scotland,Under 15,Female,DALY rate,62.6,Yes,G
2016,Falls,Scotland,15 to 24,Female,DALY rate,78.6,Yes,G
2016,Falls,Scotland,25 to 44,Female,DALY rate,62.3,Yes,G
2016,Falls,Scotland,45 to 64,Female,DALY rate,152.3,No,G
2016,Falls,Scotland,65 to 84,Female,DALY rate,896.3,No,G
2016,Falls,Scotland,85 and over,Female,DALY rate,"4,745.10",No,G
2016,Falls,Scotland,Under 15,Both sexes,DALY rate,81.2,Yes,G
2016,Falls,Scotland,15 to 24,Both sexes,DALY rate,136.2,Yes,G
2016,Falls,Scotland,25 to 44,Both sexes,DALY rate,122.9,No,G
2016,Falls,Scotland,45 to 64,Both sexes,DALY rate,209.4,No,G
2016,Falls,Scotland,65 to 84,Both sexes,DALY rate,986.4,No,G
2016,Falls,Scotland,85 and over,Both sexes,DALY rate,"4,776.60",No,G
2016,Other unintentional injuries,Scotland,Under 15,Male,DALY rate,95,Yes,A
2016,Other unintentional injuries,Scotland,15 to 24,Male,DALY rate,170.2,Yes,A
2016,Other unintentional injuries,Scotland,25 to 44,Male,DALY rate,375.1,No,A
2016,Other unintentional injuries,Scotland,45 to 64,Male,DALY rate,372,No,A
2016,Other unintentional injuries,Scotland,65 to 84,Male,DALY rate,517.4,No,A
2016,Other unintentional injuries,Scotland,85 and over,Male,DALY rate,850.6,No,A
2016,Other unintentional injuries,Scotland,Under 15,Female,DALY rate,136.4,No,A
2016,Other unintentional injuries,Scotland,15 to 24,Female,DALY rate,75.3,Yes,A
2016,Other unintentional injuries,Scotland,25 to 44,Female,DALY rate,113.6,No,A
2016,Other unintentional injuries,Scotland,45 to 64,Female,DALY rate,160.9,No,A
2016,Other unintentional injuries,Scotland,65 to 84,Female,DALY rate,259.4,No,A
2016,Other unintentional injuries,Scotland,85 and over,Female,DALY rate,551,No,A
2016,Other unintentional injuries,Scotland,Under 15,Both sexes,DALY rate,115,No,A
2016,Other unintentional injuries,Scotland,15 to 24,Both sexes,DALY rate,122.7,Yes,A
2016,Other unintentional injuries,Scotland,25 to 44,Both sexes,DALY rate,241.9,No,A
2016,Other unintentional injuries,Scotland,45 to 64,Both sexes,DALY rate,263.4,No,A
2016,Other unintentional injuries,Scotland,65 to 84,Both sexes,DALY rate,379.4,No,A
2016,Other unintentional injuries,Scotland,85 and over,Both sexes,DALY rate,657.3,No,A
2016,Self-harm and interpersonal violence,Scotland,Under 15,Male,DALY rate,21.2,Yes,G
2016,Self-harm and interpersonal violence,Scotland,15 to 24,Male,DALY rate,"1,092.40",No,G
2016,Self-harm and interpersonal violence,Scotland,25 to 44,Male,DALY rate,"1,970.50",No,G
2016,Self-harm and interpersonal violence,Scotland,45 to 64,Male,DALY rate,"1,185.60",No,G
2016,Self-harm and interpersonal violence,Scotland,65 to 84,Male,DALY rate,322.8,No,G
2016,Self-harm and interpersonal violence,Scotland,85 and over,Male,DALY rate,134.9,No,G
2016,Self-harm and interpersonal violence,Scotland,Under 15,Female,DALY rate,67.6,Yes,G
2016,Self-harm and interpersonal violence,Scotland,15 to 24,Female,DALY rate,557.1,No,G
2016,Self-harm and interpersonal violence,Scotland,25 to 44,Female,DALY rate,642.2,No,G
2016,Self-harm and interpersonal violence,Scotland,45 to 64,Female,DALY rate,446.2,No,G
2016,Self-harm and interpersonal violence,Scotland,65 to 84,Female,DALY rate,134.6,No,G
2016,Self-harm and interpersonal violence,Scotland,85 and over,Female,DALY rate,59.4,Yes,G
2016,Self-harm and interpersonal violence,Scotland,Under 15,Both sexes,DALY rate,43.8,Yes,G
2016,Self-harm and interpersonal violence,Scotland,15 to 24,Both sexes,DALY rate,827,No,G
2016,Self-harm and interpersonal violence,Scotland,25 to 44,Both sexes,DALY rate,"1,295.40",No,G
2016,Self-harm and interpersonal violence,Scotland,45 to 64,Both sexes,DALY rate,804.7,No,G
2016,Self-harm and interpersonal violence,Scotland,65 to 84,Both sexes,DALY rate,222.1,No,G
2016,Self-harm and interpersonal violence,Scotland,85 and over,Both sexes,DALY rate,80.8,No,G
2016,Unknown cause of injury,Scotland,Under 15,Male,DALY rate,39,Yes,A
2016,Unknown cause of injury,Scotland,15 to 24,Male,DALY rate,52.5,Yes,A
2016,Unknown cause of injury,Scotland,25 to 44,Male,DALY rate,83.3,Yes,A
2016,Unknown cause of injury,Scotland,45 to 64,Male,DALY rate,78.4,Yes,A
2016,Unknown cause of injury,Scotland,65 to 84,Male,DALY rate,70.8,Yes,A
2016,Unknown cause of injury,Scotland,85 and over,Male,DALY rate,91.7,Yes,A
2016,Unknown cause of injury,Scotland,Under 15,Female,DALY rate,29.9,Yes,A
2016,Unknown cause of injury,Scotland,15 to 24,Female,DALY rate,28.5,Yes,A
2016,Unknown cause of injury,Scotland,25 to 44,Female,DALY rate,33.3,Yes,A
2016,Unknown cause of injury,Scotland,45 to 64,Female,DALY rate,41.8,Yes,A
2016,Unknown cause of injury,Scotland,65 to 84,Female,DALY rate,57.2,Yes,A
2016,Unknown cause of injury,Scotland,85 and over,Female,DALY rate,117,Yes,A
2016,Unknown cause of injury,Scotland,Under 15,Both sexes,DALY rate,34.5,Yes,A
2016,Unknown cause of injury,Scotland,15 to 24,Both sexes,DALY rate,40.6,Yes,A
2016,Unknown cause of injury,Scotland,25 to 44,Both sexes,DALY rate,57.9,Yes,A
2016,Unknown cause of injury,Scotland,45 to 64,Both sexes,DALY rate,59.5,Yes,A
2016,Unknown cause of injury,Scotland,65 to 84,Both sexes,DALY rate,63.6,Yes,A
2016,Unknown cause of injury,Scotland,85 and over,Both sexes,DALY rate,108.7,Yes,A
2016,Blindness and vision loss,Scotland,Under 15,Male,DALY rate,175,Yes,A
2016,Blindness and vision loss,Scotland,15 to 24,Male,DALY rate,167.3,Yes,A
2016,Blindness and vision loss,Scotland,25 to 44,Male,DALY rate,92.3,Yes,A
2016,Blindness and vision loss,Scotland,45 to 64,Male,DALY rate,152.9,Yes,A
2016,Blindness and vision loss,Scotland,65 to 84,Male,DALY rate,517,Yes,A
2016,Blindness and vision loss,Scotland,85 and over,Male,DALY rate,"1,034.50",Yes,A
2016,Blindness and vision loss,Scotland,Under 15,Female,DALY rate,180.2,Yes,A
2016,Blindness and vision loss,Scotland,15 to 24,Female,DALY rate,178.4,Yes,A
2016,Blindness and vision loss,Scotland,25 to 44,Female,DALY rate,142.8,Yes,A
2016,Blindness and vision loss,Scotland,45 to 64,Female,DALY rate,176.9,Yes,A
2016,Blindness and vision loss,Scotland,65 to 84,Female,DALY rate,582.9,Yes,A
2016,Blindness and vision loss,Scotland,85 and over,Female,DALY rate,"1,091.50",Yes,A
2016,Blindness and vision loss,Scotland,Under 15,Both sexes,DALY rate,177.6,Yes,A
2016,Blindness and vision loss,Scotland,15 to 24,Both sexes,DALY rate,173,Yes,A
2016,Blindness and vision loss,Scotland,25 to 44,Both sexes,DALY rate,117.9,Yes,A
2016,Blindness and vision loss,Scotland,45 to 64,Both sexes,DALY rate,165.2,Yes,A
2016,Blindness and vision loss,Scotland,65 to 84,Both sexes,DALY rate,553.5,Yes,A
2016,Blindness and vision loss,Scotland,85 and over,Both sexes,DALY rate,"1,072.60",Yes,A
2016,Age-related and other hearing loss,Scotland,Under 15,Male,DALY rate,204.9,Yes,A
2016,Age-related and other hearing loss,Scotland,15 to 24,Male,DALY rate,144,Yes,A
2016,Age-related and other hearing loss,Scotland,25 to 44,Male,DALY rate,201.6,Yes,A
2016,Age-related and other hearing loss,Scotland,45 to 64,Male,DALY rate,359.4,Yes,A
2016,Age-related and other hearing loss,Scotland,65 to 84,Male,DALY rate,668.9,Yes,A
2016,Age-related and other hearing loss,Scotland,85 and over,Male,DALY rate,600.2,Yes,A
2016,Age-related and other hearing loss,Scotland,Under 15,Female,DALY rate,171.8,Yes,A
2016,Age-related and other hearing loss,Scotland,15 to 24,Female,DALY rate,171.4,Yes,A
2016,Age-related and other hearing loss,Scotland,25 to 44,Female,DALY rate,205.8,Yes,A
2016,Age-related and other hearing loss,Scotland,45 to 64,Female,DALY rate,318,Yes,A
2016,Age-related and other hearing loss,Scotland,65 to 84,Female,DALY rate,618.4,Yes,A
2016,Age-related and other hearing loss,Scotland,85 and over,Female,DALY rate,747.9,Yes,A
2016,Age-related and other hearing loss,Scotland,Under 15,Both sexes,DALY rate,188.7,Yes,A
2016,Age-related and other hearing loss,Scotland,15 to 24,Both sexes,DALY rate,157.6,Yes,A
2016,Age-related and other hearing loss,Scotland,25 to 44,Both sexes,DALY rate,203.8,Yes,A
2016,Age-related and other hearing loss,Scotland,45 to 64,Both sexes,DALY rate,338.1,Yes,A
2016,Age-related and other hearing loss,Scotland,65 to 84,Both sexes,DALY rate,643.1,Yes,A
2016,Age-related and other hearing loss,Scotland,85 and over,Both sexes,DALY rate,697.9,Yes,A
2016,Other sensory conditions,Scotland,Under 15,Male,DALY rate,72.2,Yes,A
2016,Other sensory conditions,Scotland,15 to 24,Male,DALY rate,108.9,Yes,A
2016,Other sensory conditions,Scotland,25 to 44,Male,DALY rate,197.2,Yes,A
2016,Other sensory conditions,Scotland,45 to 64,Male,DALY rate,265.6,Yes,A
2016,Other sensory conditions,Scotland,65 to 84,Male,DALY rate,265.9,Yes,A
2016,Other sensory conditions,Scotland,85 and over,Male,DALY rate,169.3,Yes,A
2016,Other sensory conditions,Scotland,Under 15,Female,DALY rate,100.5,Yes,A
2016,Other sensory conditions,Scotland,15 to 24,Female,DALY rate,219.7,Yes,A
2016,Other sensory conditions,Scotland,25 to 44,Female,DALY rate,344,Yes,A
2016,Other sensory conditions,Scotland,45 to 64,Female,DALY rate,410.4,Yes,A
2016,Other sensory conditions,Scotland,65 to 84,Female,DALY rate,349.4,Yes,A
2016,Other sensory conditions,Scotland,85 and over,Female,DALY rate,180.7,Yes,A
2016,Other sensory conditions,Scotland,Under 15,Both sexes,DALY rate,86,Yes,A
2016,Other sensory conditions,Scotland,15 to 24,Both sexes,DALY rate,163.6,Yes,A
2016,Other sensory conditions,Scotland,25 to 44,Both sexes,DALY rate,271.9,Yes,A
2016,Other sensory conditions,Scotland,45 to 64,Both sexes,DALY rate,340.1,Yes,A
2016,Other sensory conditions,Scotland,65 to 84,Both sexes,DALY rate,310.8,Yes,A
2016,Other sensory conditions,Scotland,85 and over,Both sexes,DALY rate,176.7,Yes,A
2016,Skin and subcutaneous diseases,Scotland,Under 15,Male,DALY rate,380,Yes,A
2016,Skin and subcutaneous diseases,Scotland,15 to 24,Male,DALY rate,341.5,Yes,A
2016,Skin and subcutaneous diseases,Scotland,25 to 44,Male,DALY rate,222.4,Yes,A
2016,Skin and subcutaneous diseases,Scotland,45 to 64,Male,DALY rate,251.3,No,A
2016,Skin and subcutaneous diseases,Scotland,65 to 84,Male,DALY rate,449.8,No,A
2016,Skin and subcutaneous diseases,Scotland,85 and over,Male,DALY rate,746.3,No,A
2016,Skin and subcutaneous diseases,Scotland,Under 15,Female,DALY rate,415.6,Yes,A
2016,Skin and subcutaneous diseases,Scotland,15 to 24,Female,DALY rate,526.4,Yes,A
2016,Skin and subcutaneous diseases,Scotland,25 to 44,Female,DALY rate,344.2,Yes,A
2016,Skin and subcutaneous diseases,Scotland,45 to 64,Female,DALY rate,304.7,No,A
2016,Skin and subcutaneous diseases,Scotland,65 to 84,Female,DALY rate,403.7,No,A
2016,Skin and subcutaneous diseases,Scotland,85 and over,Female,DALY rate,894.1,No,A
2016,Skin and subcutaneous diseases,Scotland,Under 15,Both sexes,DALY rate,397.4,Yes,A
2016,Skin and subcutaneous diseases,Scotland,15 to 24,Both sexes,DALY rate,433.1,Yes,A
2016,Skin and subcutaneous diseases,Scotland,25 to 44,Both sexes,DALY rate,284.2,Yes,A
2016,Skin and subcutaneous diseases,Scotland,45 to 64,Both sexes,DALY rate,278.8,No,A
2016,Skin and subcutaneous diseases,Scotland,65 to 84,Both sexes,DALY rate,426,No,A
2016,Skin and subcutaneous diseases,Scotland,85 and over,Both sexes,DALY rate,843.4,No,A
2016,All causes of disease and injury,North,Under 15,Male,DALY rate,"5,447.40",No,na
2016,All causes of disease and injury,North,15 to 24,Male,DALY rate,"10,016.20",No,na
2016,All causes of disease and injury,North,25 to 44,Male,DALY rate,"17,931.30",No,na
2016,All causes of disease and injury,North,45 to 64,Male,DALY rate,"33,361.80",No,na
2016,All causes of disease and injury,North,65 to 84,Male,DALY rate,"78,970.30",No,na
2016,All causes of disease and injury,North,85 and over,Male,DALY rate,"173,706.00",No,na
2016,All causes of disease and injury,North,Under 15,Female,DALY rate,"5,391.60",No,na
2016,All causes of disease and injury,North,15 to 24,Female,DALY rate,"9,226.70",No,na
2016,All causes of disease and injury,North,25 to 44,Female,DALY rate,"16,374.60",No,na
2016,All causes of disease and injury,North,45 to 64,Female,DALY rate,"27,725.10",No,na
2016,All causes of disease and injury,North,65 to 84,Female,DALY rate,"60,081.00",No,na
2016,All causes of disease and injury,North,85 and over,Female,DALY rate,"148,163.80",No,na
2016,All causes of disease and injury,North,Under 15,Both sexes,DALY rate,"5,420.40",No,na
2016,All causes of disease and injury,North,15 to 24,Both sexes,DALY rate,"9,634.10",No,na
2016,All causes of disease and injury,North,25 to 44,Both sexes,DALY rate,"17,155.80",No,na
2016,All causes of disease and injury,North,45 to 64,Both sexes,DALY rate,"30,502.20",No,na
2016,All causes of disease and injury,North,65 to 84,Both sexes,DALY rate,"68,856.30",No,na
2016,All causes of disease and injury,North,85 and over,Both sexes,DALY rate,"156,782.60",No,na
2016,HIV/AIDS and tuberculosis,North,Under 15,Male,DALY rate,0.8,Yes,G
2016,HIV/AIDS and tuberculosis,North,15 to 24,Male,DALY rate,3.7,Yes,G
2016,HIV/AIDS and tuberculosis,North,25 to 44,Male,DALY rate,27.7,Yes,G
2016,HIV/AIDS and tuberculosis,North,45 to 64,Male,DALY rate,120.7,No,G
2016,HIV/AIDS and tuberculosis,North,65 to 84,Male,DALY rate,23.3,Yes,G
2016,HIV/AIDS and tuberculosis,North,85 and over,Male,DALY rate,64.8,Yes,G
2016,HIV/AIDS and tuberculosis,North,Under 15,Female,DALY rate,1.2,Yes,G
2016,HIV/AIDS and tuberculosis,North,15 to 24,Female,DALY rate,2.8,Yes,G
2016,HIV/AIDS and tuberculosis,North,25 to 44,Female,DALY rate,19.5,Yes,G
2016,HIV/AIDS and tuberculosis,North,45 to 64,Female,DALY rate,26.9,Yes,G
2016,HIV/AIDS and tuberculosis,North,65 to 84,Female,DALY rate,16.8,Yes,G
2016,HIV/AIDS and tuberculosis,North,85 and over,Female,DALY rate,46.2,Yes,G
2016,HIV/AIDS and tuberculosis,North,Under 15,Both sexes,DALY rate,1,Yes,G
2016,HIV/AIDS and tuberculosis,North,15 to 24,Both sexes,DALY rate,3.3,Yes,G
2016,HIV/AIDS and tuberculosis,North,25 to 44,Both sexes,DALY rate,23.6,Yes,G
2016,HIV/AIDS and tuberculosis,North,45 to 64,Both sexes,DALY rate,73,No,G
2016,HIV/AIDS and tuberculosis,North,65 to 84,Both sexes,DALY rate,19.7,Yes,G
2016,HIV/AIDS and tuberculosis,North,85 and over,Both sexes,DALY rate,49,Yes,G
2016,Lower respiratory infections,North,Under 15,Male,DALY rate,30.6,Yes,G
2016,Lower respiratory infections,North,15 to 24,Male,DALY rate,11.8,Yes,G
2016,Lower respiratory infections,North,25 to 44,Male,DALY rate,76.7,Yes,G
2016,Lower respiratory infections,North,45 to 64,Male,DALY rate,440,No,G
2016,Lower respiratory infections,North,65 to 84,Male,DALY rate,"1,890.00",No,G
2016,Lower respiratory infections,North,85 and over,Male,DALY rate,"8,821.00",No,G
2016,Lower respiratory infections,North,Under 15,Female,DALY rate,27.1,Yes,G
2016,Lower respiratory infections,North,15 to 24,Female,DALY rate,64.8,Yes,G
2016,Lower respiratory infections,North,25 to 44,Female,DALY rate,35.2,Yes,G
2016,Lower respiratory infections,North,45 to 64,Female,DALY rate,352.9,No,G
2016,Lower respiratory infections,North,65 to 84,Female,DALY rate,"1,274.10",No,G
2016,Lower respiratory infections,North,85 and over,Female,DALY rate,"9,220.40",No,G
2016,Lower respiratory infections,North,Under 15,Both sexes,DALY rate,28.9,Yes,G
2016,Lower respiratory infections,North,15 to 24,Both sexes,DALY rate,37.4,Yes,G
2016,Lower respiratory infections,North,25 to 44,Both sexes,DALY rate,55.5,Yes,G
2016,Lower respiratory infections,North,45 to 64,Both sexes,DALY rate,395.4,No,G
2016,Lower respiratory infections,North,65 to 84,Both sexes,DALY rate,"1,558.60",No,G
2016,Lower respiratory infections,North,85 and over,Both sexes,DALY rate,"9,102.40",No,G
2016,Diarrhoea and other common infections,North,Under 15,Male,DALY rate,123.1,Yes,A
2016,Diarrhoea and other common infections,North,15 to 24,Male,DALY rate,70.8,Yes,A
2016,Diarrhoea and other common infections,North,25 to 44,Male,DALY rate,158.6,Yes,A
2016,Diarrhoea and other common infections,North,45 to 64,Male,DALY rate,108.9,Yes,A
2016,Diarrhoea and other common infections,North,65 to 84,Male,DALY rate,208,No,A
2016,Diarrhoea and other common infections,North,85 and over,Male,DALY rate,445.3,No,A
2016,Diarrhoea and other common infections,North,Under 15,Female,DALY rate,194.1,Yes,A
2016,Diarrhoea and other common infections,North,15 to 24,Female,DALY rate,84,Yes,A
2016,Diarrhoea and other common infections,North,25 to 44,Female,DALY rate,112.8,Yes,A
2016,Diarrhoea and other common infections,North,45 to 64,Female,DALY rate,97.7,Yes,A
2016,Diarrhoea and other common infections,North,65 to 84,Female,DALY rate,283,No,A
2016,Diarrhoea and other common infections,North,85 and over,Female,DALY rate,742.4,No,A
2016,Diarrhoea and other common infections,North,Under 15,Both sexes,DALY rate,157.8,Yes,A
2016,Diarrhoea and other common infections,North,15 to 24,Both sexes,DALY rate,77.2,Yes,A
2016,Diarrhoea and other common infections,North,25 to 44,Both sexes,DALY rate,135.2,Yes,A
2016,Diarrhoea and other common infections,North,45 to 64,Both sexes,DALY rate,103.2,No,A
2016,Diarrhoea and other common infections,North,65 to 84,Both sexes,DALY rate,246.2,No,A
2016,Diarrhoea and other common infections,North,85 and over,Both sexes,DALY rate,636,No,A
2016,Neonatal disorders,North,Under 15,Male,DALY rate,826.8,No,G
2016,Neonatal disorders,North,15 to 24,Male,DALY rate,68.5,Yes,G
2016,Neonatal disorders,North,25 to 44,Male,DALY rate,0,Yes,G
2016,Neonatal disorders,North,45 to 64,Male,DALY rate,0,Yes,G
2016,Neonatal disorders,North,65 to 84,Male,DALY rate,0,Yes,G
2016,Neonatal disorders,North,85 and over,Male,DALY rate,0,Yes,G
2016,Neonatal disorders,North,Under 15,Female,DALY rate,"1,044.70",No,G
2016,Neonatal disorders,North,15 to 24,Female,DALY rate,7.9,Yes,G
2016,Neonatal disorders,North,25 to 44,Female,DALY rate,0.1,Yes,G
2016,Neonatal disorders,North,45 to 64,Female,DALY rate,0.1,Yes,G
2016,Neonatal disorders,North,65 to 84,Female,DALY rate,0,Yes,G
2016,Neonatal disorders,North,85 and over,Female,DALY rate,6.4,Yes,G
2016,Neonatal disorders,North,Under 15,Both sexes,DALY rate,932.9,No,G
2016,Neonatal disorders,North,15 to 24,Both sexes,DALY rate,39.2,Yes,G
2016,Neonatal disorders,North,25 to 44,Both sexes,DALY rate,0.1,Yes,G
2016,Neonatal disorders,North,45 to 64,Both sexes,DALY rate,0.1,Yes,G
2016,Neonatal disorders,North,65 to 84,Both sexes,DALY rate,0,Yes,G
2016,Neonatal disorders,North,85 and over,Both sexes,DALY rate,4,Yes,G
2016,Maternal disorders,North,Under 15,Male,DALY rate,0,Yes,A
2016,Maternal disorders,North,15 to 24,Male,DALY rate,0,Yes,A
2016,Maternal disorders,North,25 to 44,Male,DALY rate,0,Yes,A
2016,Maternal disorders,North,45 to 64,Male,DALY rate,0,Yes,A
2016,Maternal disorders,North,65 to 84,Male,DALY rate,0,Yes,A
2016,Maternal disorders,North,85 and over,Male,DALY rate,0,Yes,A
2016,Maternal disorders,North,Under 15,Female,DALY rate,0,Yes,A
2016,Maternal disorders,North,15 to 24,Female,DALY rate,51.9,Yes,A
2016,Maternal disorders,North,25 to 44,Female,DALY rate,59.9,Yes,A
2016,Maternal disorders,North,45 to 64,Female,DALY rate,0.3,Yes,A
2016,Maternal disorders,North,65 to 84,Female,DALY rate,0,Yes,A
2016,Maternal disorders,North,85 and over,Female,DALY rate,0,Yes,A
2016,Maternal disorders,North,Under 15,Both sexes,DALY rate,0,Yes,A
2016,Maternal disorders,North,15 to 24,Both sexes,DALY rate,25.2,Yes,A
2016,Maternal disorders,North,25 to 44,Both sexes,DALY rate,29.8,Yes,A
2016,Maternal disorders,North,45 to 64,Both sexes,DALY rate,0.1,Yes,A
2016,Maternal disorders,North,65 to 84,Both sexes,DALY rate,0,Yes,A
2016,Maternal disorders,North,85 and over,Both sexes,DALY rate,0,Yes,A
2016,Nutritional deficiencies,North,Under 15,Male,DALY rate,45.2,Yes,R
2016,Nutritional deficiencies,North,15 to 24,Male,DALY rate,8.1,Yes,R
2016,Nutritional deficiencies,North,25 to 44,Male,DALY rate,7.1,Yes,R
2016,Nutritional deficiencies,North,45 to 64,Male,DALY rate,41.4,Yes,R
2016,Nutritional deficiencies,North,65 to 84,Male,DALY rate,154,Yes,R
2016,Nutritional deficiencies,North,85 and over,Male,DALY rate,573.3,No,R
2016,Nutritional deficiencies,North,Under 15,Female,DALY rate,20.5,Yes,R
2016,Nutritional deficiencies,North,15 to 24,Female,DALY rate,94.4,Yes,R
2016,Nutritional deficiencies,North,25 to 44,Female,DALY rate,96.2,Yes,R
2016,Nutritional deficiencies,North,45 to 64,Female,DALY rate,93.6,Yes,R
2016,Nutritional deficiencies,North,65 to 84,Female,DALY rate,212.2,No,R
2016,Nutritional deficiencies,North,85 and over,Female,DALY rate,934.6,No,R
2016,Nutritional deficiencies,North,Under 15,Both sexes,DALY rate,33.2,Yes,R
2016,Nutritional deficiencies,North,15 to 24,Both sexes,DALY rate,50,Yes,R
2016,Nutritional deficiencies,North,25 to 44,Both sexes,DALY rate,51.6,Yes,R
2016,Nutritional deficiencies,North,45 to 64,Both sexes,DALY rate,68.1,Yes,R
2016,Nutritional deficiencies,North,65 to 84,Both sexes,DALY rate,187,No,R
2016,Nutritional deficiencies,North,85 and over,Both sexes,DALY rate,819.6,No,R
2016,"Other communicable, maternal, neonatal and nutritional diseases",North,Under 15,Male,DALY rate,0.5,Yes,G
2016,"Other communicable, maternal, neonatal and nutritional diseases",North,15 to 24,Male,DALY rate,0.4,Yes,G
2016,"Other communicable, maternal, neonatal and nutritional diseases",North,25 to 44,Male,DALY rate,1.3,Yes,G
2016,"Other communicable, maternal, neonatal and nutritional diseases",North,45 to 64,Male,DALY rate,56.6,Yes,G
2016,"Other communicable, maternal, neonatal and nutritional diseases",North,65 to 84,Male,DALY rate,84.4,Yes,G
2016,"Other communicable, maternal, neonatal and nutritional diseases",North,85 and over,Male,DALY rate,181.2,Yes,G
2016,"Other communicable, maternal, neonatal and nutritional diseases",North,Under 15,Female,DALY rate,4.9,Yes,G
2016,"Other communicable, maternal, neonatal and nutritional diseases",North,15 to 24,Female,DALY rate,1.2,Yes,G
2016,"Other communicable, maternal, neonatal and nutritional diseases",North,25 to 44,Female,DALY rate,2.8,Yes,G
2016,"Other communicable, maternal, neonatal and nutritional diseases",North,45 to 64,Female,DALY rate,21.3,Yes,G
2016,"Other communicable, maternal, neonatal and nutritional diseases",North,65 to 84,Female,DALY rate,18.2,Yes,G
2016,"Other communicable, maternal, neonatal and nutritional diseases",North,85 and over,Female,DALY rate,63.4,Yes,G
2016,"Other communicable, maternal, neonatal and nutritional diseases",North,Under 15,Both sexes,DALY rate,2.6,Yes,G
2016,"Other communicable, maternal, neonatal and nutritional diseases",North,15 to 24,Both sexes,DALY rate,0.8,Yes,G
2016,"Other communicable, maternal, neonatal and nutritional diseases",North,25 to 44,Both sexes,DALY rate,2.1,Yes,G
2016,"Other communicable, maternal, neonatal and nutritional diseases",North,45 to 64,Both sexes,DALY rate,38.8,Yes,G
2016,"Other communicable, maternal, neonatal and nutritional diseases",North,65 to 84,Both sexes,DALY rate,49.6,No,G
2016,"Other communicable, maternal, neonatal and nutritional diseases",North,85 and over,Both sexes,DALY rate,95.4,Yes,G
2016,Oesophageal cancer,North,Under 15,Male,DALY rate,0,Yes,G
2016,Oesophageal cancer,North,15 to 24,Male,DALY rate,0,Yes,G
2016,Oesophageal cancer,North,25 to 44,Male,DALY rate,12.3,Yes,G
2016,Oesophageal cancer,North,45 to 64,Male,DALY rate,735.2,No,G
2016,Oesophageal cancer,North,65 to 84,Male,DALY rate,"1,925.70",No,G
2016,Oesophageal cancer,North,85 and over,Male,DALY rate,"1,699.50",No,G
2016,Oesophageal cancer,North,Under 15,Female,DALY rate,0,Yes,G
2016,Oesophageal cancer,North,15 to 24,Female,DALY rate,0,Yes,G
2016,Oesophageal cancer,North,25 to 44,Female,DALY rate,0,Yes,G
2016,Oesophageal cancer,North,45 to 64,Female,DALY rate,316.4,No,G
2016,Oesophageal cancer,North,65 to 84,Female,DALY rate,593.6,No,G
2016,Oesophageal cancer,North,85 and over,Female,DALY rate,750.5,No,G
2016,Oesophageal cancer,North,Under 15,Both sexes,DALY rate,0,Yes,G
2016,Oesophageal cancer,North,15 to 24,Both sexes,DALY rate,0,Yes,G
2016,Oesophageal cancer,North,25 to 44,Both sexes,DALY rate,6.1,Yes,G
2016,Oesophageal cancer,North,45 to 64,Both sexes,DALY rate,523,No,G
2016,Oesophageal cancer,North,65 to 84,Both sexes,DALY rate,"1,217.60",No,G
2016,Oesophageal cancer,North,85 and over,Both sexes,DALY rate,"1,068.20",No,G
2016,Stomach cancer,North,Under 15,Male,DALY rate,0,Yes,G
2016,Stomach cancer,North,15 to 24,Male,DALY rate,0,Yes,G
2016,Stomach cancer,North,25 to 44,Male,DALY rate,6.5,Yes,G
2016,Stomach cancer,North,45 to 64,Male,DALY rate,292.9,No,G
2016,Stomach cancer,North,65 to 84,Male,DALY rate,788.3,No,G
2016,Stomach cancer,North,85 and over,Male,DALY rate,845.4,No,G
2016,Stomach cancer,North,Under 15,Female,DALY rate,0,Yes,G
2016,Stomach cancer,North,15 to 24,Female,DALY rate,0,Yes,G
2016,Stomach cancer,North,25 to 44,Female,DALY rate,40.6,Yes,G
2016,Stomach cancer,North,45 to 64,Female,DALY rate,96.4,No,G
2016,Stomach cancer,North,65 to 84,Female,DALY rate,201.1,No,G
2016,Stomach cancer,North,85 and over,Female,DALY rate,327.1,No,G
2016,Stomach cancer,North,Under 15,Both sexes,DALY rate,0,Yes,G
2016,Stomach cancer,North,15 to 24,Both sexes,DALY rate,0,Yes,G
2016,Stomach cancer,North,25 to 44,Both sexes,DALY rate,23.4,Yes,G
2016,Stomach cancer,North,45 to 64,Both sexes,DALY rate,193,No,G
2016,Stomach cancer,North,65 to 84,Both sexes,DALY rate,469.6,No,G
2016,Stomach cancer,North,85 and over,Both sexes,DALY rate,501.1,No,G
2016,Colorectal cancer,North,Under 15,Male,DALY rate,6.6,Yes,G
2016,Colorectal cancer,North,15 to 24,Male,DALY rate,11.1,Yes,G
2016,Colorectal cancer,North,25 to 44,Male,DALY rate,109.6,Yes,G
2016,Colorectal cancer,North,45 to 64,Male,DALY rate,935,No,G
2016,Colorectal cancer,North,65 to 84,Male,DALY rate,"2,727.10",No,G
2016,Colorectal cancer,North,85 and over,Male,DALY rate,"3,890.00",No,G
2016,Colorectal cancer,North,Under 15,Female,DALY rate,5.4,Yes,G
2016,Colorectal cancer,North,15 to 24,Female,DALY rate,7.3,Yes,G
2016,Colorectal cancer,North,25 to 44,Female,DALY rate,197.4,No,G
2016,Colorectal cancer,North,45 to 64,Female,DALY rate,755.6,No,G
2016,Colorectal cancer,North,65 to 84,Female,DALY rate,"1,851.30",No,G
2016,Colorectal cancer,North,85 and over,Female,DALY rate,"3,111.10",No,G
2016,Colorectal cancer,North,Under 15,Both sexes,DALY rate,6,Yes,G
2016,Colorectal cancer,North,15 to 24,Both sexes,DALY rate,9.2,Yes,G
2016,Colorectal cancer,North,25 to 44,Both sexes,DALY rate,153.8,No,G
2016,Colorectal cancer,North,45 to 64,Both sexes,DALY rate,844.6,No,G
2016,Colorectal cancer,North,65 to 84,Both sexes,DALY rate,"2,248.30",No,G
2016,Colorectal cancer,North,85 and over,Both sexes,DALY rate,"3,349.40",No,G
2016,Liver cancer,North,Under 15,Male,DALY rate,0.1,Yes,G
2016,Liver cancer,North,15 to 24,Male,DALY rate,0,Yes,G
2016,Liver cancer,North,25 to 44,Male,DALY rate,101.5,Yes,G
2016,Liver cancer,North,45 to 64,Male,DALY rate,551.6,No,G
2016,Liver cancer,North,65 to 84,Male,DALY rate,"1,008.60",No,G
2016,Liver cancer,North,85 and over,Male,DALY rate,"1,314.60",No,G
2016,Liver cancer,North,Under 15,Female,DALY rate,0.5,Yes,G
2016,Liver cancer,North,15 to 24,Female,DALY rate,0,Yes,G
2016,Liver cancer,North,25 to 44,Female,DALY rate,30.1,Yes,G
2016,Liver cancer,North,45 to 64,Female,DALY rate,127.7,No,G
2016,Liver cancer,North,65 to 84,Female,DALY rate,558.8,No,G
2016,Liver cancer,North,85 and over,Female,DALY rate,596.5,No,G
2016,Liver cancer,North,Under 15,Both sexes,DALY rate,0.3,Yes,G
2016,Liver cancer,North,15 to 24,Both sexes,DALY rate,0,Yes,G
2016,Liver cancer,North,25 to 44,Both sexes,DALY rate,65.6,Yes,G
2016,Liver cancer,North,45 to 64,Both sexes,DALY rate,336.4,No,G
2016,Liver cancer,North,65 to 84,Both sexes,DALY rate,772.8,No,G
2016,Liver cancer,North,85 and over,Both sexes,DALY rate,807.2,No,G
2016,Pancreatic cancer,North,Under 15,Male,DALY rate,0,Yes,G
2016,Pancreatic cancer,North,15 to 24,Male,DALY rate,0,Yes,G
2016,Pancreatic cancer,North,25 to 44,Male,DALY rate,7.1,Yes,G
2016,Pancreatic cancer,North,45 to 64,Male,DALY rate,325.6,No,G
2016,Pancreatic cancer,North,65 to 84,Male,DALY rate,"1,245.00",No,G
2016,Pancreatic cancer,North,85 and over,Male,DALY rate,"1,498.60",No,G
2016,Pancreatic cancer,North,Under 15,Female,DALY rate,0,Yes,G
2016,Pancreatic cancer,North,15 to 24,Female,DALY rate,0,Yes,G
2016,Pancreatic cancer,North,25 to 44,Female,DALY rate,90.1,Yes,G
2016,Pancreatic cancer,North,45 to 64,Female,DALY rate,201.9,No,G
2016,Pancreatic cancer,North,65 to 84,Female,DALY rate,"1,072.60",No,G
2016,Pancreatic cancer,North,85 and over,Female,DALY rate,730.1,No,G
2016,Pancreatic cancer,North,Under 15,Both sexes,DALY rate,0,Yes,G
2016,Pancreatic cancer,North,15 to 24,Both sexes,DALY rate,0,Yes,G
2016,Pancreatic cancer,North,25 to 44,Both sexes,DALY rate,49.3,Yes,G
2016,Pancreatic cancer,North,45 to 64,Both sexes,DALY rate,263,No,G
2016,Pancreatic cancer,North,65 to 84,Both sexes,DALY rate,"1,158.80",No,G
2016,Pancreatic cancer,North,85 and over,Both sexes,DALY rate,"1,007.90",No,G
2016,Lung cancer,North,Under 15,Male,DALY rate,0,Yes,G
2016,Lung cancer,North,15 to 24,Male,DALY rate,0,Yes,G
2016,Lung cancer,North,25 to 44,Male,DALY rate,270.5,No,G
2016,Lung cancer,North,45 to 64,Male,DALY rate,"1,916.60",No,G
2016,Lung cancer,North,65 to 84,Male,DALY rate,"6,273.00",No,G
2016,Lung cancer,North,85 and over,Male,DALY rate,"5,320.70",No,G
2016,Lung cancer,North,Under 15,Female,DALY rate,0,Yes,G
2016,Lung cancer,North,15 to 24,Female,DALY rate,0,Yes,G
2016,Lung cancer,North,25 to 44,Female,DALY rate,160.2,No,G
2016,Lung cancer,North,45 to 64,Female,DALY rate,"1,379.70",No,G
2016,Lung cancer,North,65 to 84,Female,DALY rate,"4,074.60",No,G
2016,Lung cancer,North,85 and over,Female,DALY rate,"3,272.20",No,G
2016,Lung cancer,North,Under 15,Both sexes,DALY rate,0,Yes,G
2016,Lung cancer,North,15 to 24,Both sexes,DALY rate,0,Yes,G
2016,Lung cancer,North,25 to 44,Both sexes,DALY rate,214.8,No,G
2016,Lung cancer,North,45 to 64,Both sexes,DALY rate,"1,644.80",No,G
2016,Lung cancer,North,65 to 84,Both sexes,DALY rate,"5,097.40",No,G
2016,Lung cancer,North,85 and over,Both sexes,DALY rate,"3,933.10",No,G
2016,Breast cancer,North,Under 15,Male,DALY rate,0.1,Yes,G
2016,Breast cancer,North,15 to 24,Male,DALY rate,5,Yes,G
2016,Breast cancer,North,25 to 44,Male,DALY rate,14.6,Yes,G
2016,Breast cancer,North,45 to 64,Male,DALY rate,7.2,Yes,G
2016,Breast cancer,North,65 to 84,Male,DALY rate,9.4,Yes,G
2016,Breast cancer,North,85 and over,Male,DALY rate,28.1,Yes,G
2016,Breast cancer,North,Under 15,Female,DALY rate,0.2,Yes,G
2016,Breast cancer,North,15 to 24,Female,DALY rate,18.1,Yes,G
2016,Breast cancer,North,25 to 44,Female,DALY rate,661.6,No,G
2016,Breast cancer,North,45 to 64,Female,DALY rate,"1,956.40",No,G
2016,Breast cancer,North,65 to 84,Female,DALY rate,"2,265.70",No,G
2016,Breast cancer,North,85 and over,Female,DALY rate,"3,403.50",No,G
2016,Breast cancer,North,Under 15,Both sexes,DALY rate,0.2,Yes,G
2016,Breast cancer,North,15 to 24,Both sexes,DALY rate,11.4,Yes,G
2016,Breast cancer,North,25 to 44,Both sexes,DALY rate,340.4,No,G
2016,Breast cancer,North,45 to 64,Both sexes,DALY rate,996.9,No,G
2016,Breast cancer,North,65 to 84,Both sexes,DALY rate,"1,212.10",No,G
2016,Breast cancer,North,85 and over,Both sexes,DALY rate,"2,258.30",No,G
2016,Ovarian cancer,North,Under 15,Male,DALY rate,0,Yes,G
2016,Ovarian cancer,North,15 to 24,Male,DALY rate,0,Yes,G
2016,Ovarian cancer,North,25 to 44,Male,DALY rate,0,Yes,G
2016,Ovarian cancer,North,45 to 64,Male,DALY rate,0,Yes,G
2016,Ovarian cancer,North,65 to 84,Male,DALY rate,0,Yes,G
2016,Ovarian cancer,North,85 and over,Male,DALY rate,0,Yes,G
2016,Ovarian cancer,North,Under 15,Female,DALY rate,0.5,Yes,G
2016,Ovarian cancer,North,15 to 24,Female,DALY rate,0.5,Yes,G
2016,Ovarian cancer,North,25 to 44,Female,DALY rate,62.7,Yes,G
2016,Ovarian cancer,North,45 to 64,Female,DALY rate,481.5,No,G
2016,Ovarian cancer,North,65 to 84,Female,DALY rate,807.8,No,G
2016,Ovarian cancer,North,85 and over,Female,DALY rate,584.8,No,G
2016,Ovarian cancer,North,Under 15,Both sexes,DALY rate,0.2,Yes,G
2016,Ovarian cancer,North,15 to 24,Both sexes,DALY rate,0.2,Yes,G
2016,Ovarian cancer,North,25 to 44,Both sexes,DALY rate,31.9,Yes,G
2016,Ovarian cancer,North,45 to 64,Both sexes,DALY rate,244.2,No,G
2016,Ovarian cancer,North,65 to 84,Both sexes,DALY rate,431.4,No,G
2016,Ovarian cancer,North,85 and over,Both sexes,DALY rate,381.4,No,G
2016,Prostate cancer,North,Under 15,Male,DALY rate,0.1,Yes,G
2016,Prostate cancer,North,15 to 24,Male,DALY rate,0,Yes,G
2016,Prostate cancer,North,25 to 44,Male,DALY rate,0.4,Yes,G
2016,Prostate cancer,North,45 to 64,Male,DALY rate,340.2,No,G
2016,Prostate cancer,North,65 to 84,Male,DALY rate,"3,125.70",No,G
2016,Prostate cancer,North,85 and over,Male,DALY rate,"8,559.50",No,G
2016,Prostate cancer,North,Under 15,Female,DALY rate,0,Yes,G
2016,Prostate cancer,North,15 to 24,Female,DALY rate,0,Yes,G
2016,Prostate cancer,North,25 to 44,Female,DALY rate,0,Yes,G
2016,Prostate cancer,North,45 to 64,Female,DALY rate,0,Yes,G
2016,Prostate cancer,North,65 to 84,Female,DALY rate,0,Yes,G
2016,Prostate cancer,North,85 and over,Female,DALY rate,0,Yes,G
2016,Prostate cancer,North,Under 15,Both sexes,DALY rate,0,Yes,G
2016,Prostate cancer,North,15 to 24,Both sexes,DALY rate,0,Yes,G
2016,Prostate cancer,North,25 to 44,Both sexes,DALY rate,0.2,Yes,G
2016,Prostate cancer,North,45 to 64,Both sexes,DALY rate,167.9,No,G
2016,Prostate cancer,North,65 to 84,Both sexes,DALY rate,"1,432.60",No,G
2016,Prostate cancer,North,85 and over,Both sexes,DALY rate,"2,939.40",No,G
2016,Kidney cancer,North,Under 15,Male,DALY rate,0.4,Yes,G
2016,Kidney cancer,North,15 to 24,Male,DALY rate,0.1,Yes,G
2016,Kidney cancer,North,25 to 44,Male,DALY rate,69.9,Yes,G
2016,Kidney cancer,North,45 to 64,Male,DALY rate,294.1,No,G
2016,Kidney cancer,North,65 to 84,Male,DALY rate,924.4,No,G
2016,Kidney cancer,North,85 and over,Male,DALY rate,660.4,No,G
2016,Kidney cancer,North,Under 15,Female,DALY rate,1.1,Yes,G
2016,Kidney cancer,North,15 to 24,Female,DALY rate,0.1,Yes,G
2016,Kidney cancer,North,25 to 44,Female,DALY rate,0.6,Yes,G
2016,Kidney cancer,North,45 to 64,Female,DALY rate,104.5,No,G
2016,Kidney cancer,North,65 to 84,Female,DALY rate,394.3,No,G
2016,Kidney cancer,North,85 and over,Female,DALY rate,300.6,No,G
2016,Kidney cancer,North,Under 15,Both sexes,DALY rate,0.8,Yes,G
2016,Kidney cancer,North,15 to 24,Both sexes,DALY rate,0.1,Yes,G
2016,Kidney cancer,North,25 to 44,Both sexes,DALY rate,35,Yes,G
2016,Kidney cancer,North,45 to 64,Both sexes,DALY rate,198,No,G
2016,Kidney cancer,North,65 to 84,Both sexes,DALY rate,635.7,No,G
2016,Kidney cancer,North,85 and over,Both sexes,DALY rate,419.3,No,G
2016,Bladder cancer,North,Under 15,Male,DALY rate,1.2,Yes,G
2016,Bladder cancer,North,15 to 24,Male,DALY rate,1.6,Yes,G
2016,Bladder cancer,North,25 to 44,Male,DALY rate,1.9,Yes,G
2016,Bladder cancer,North,45 to 64,Male,DALY rate,156.7,No,G
2016,Bladder cancer,North,65 to 84,Male,DALY rate,"1,082.90",No,G
2016,Bladder cancer,North,85 and over,Male,DALY rate,"2,155.90",No,G
2016,Bladder cancer,North,Under 15,Female,DALY rate,0,Yes,G
2016,Bladder cancer,North,15 to 24,Female,DALY rate,0.4,Yes,G
2016,Bladder cancer,North,25 to 44,Female,DALY rate,2.7,Yes,G
2016,Bladder cancer,North,45 to 64,Female,DALY rate,112.7,No,G
2016,Bladder cancer,North,65 to 84,Female,DALY rate,339.9,No,G
2016,Bladder cancer,North,85 and over,Female,DALY rate,586.1,No,G
2016,Bladder cancer,North,Under 15,Both sexes,DALY rate,0.6,Yes,G
2016,Bladder cancer,North,15 to 24,Both sexes,DALY rate,1,Yes,G
2016,Bladder cancer,North,25 to 44,Both sexes,DALY rate,2.3,Yes,G
2016,Bladder cancer,North,45 to 64,Both sexes,DALY rate,134.2,No,G
2016,Bladder cancer,North,65 to 84,Both sexes,DALY rate,681.9,No,G
2016,Bladder cancer,North,85 and over,Both sexes,DALY rate,"1,095.50",No,G
2016,Non-Hodgkin's lymphoma,North,Under 15,Male,DALY rate,0.3,Yes,G
2016,Non-Hodgkin's lymphoma,North,15 to 24,Male,DALY rate,0.8,Yes,G
2016,Non-Hodgkin's lymphoma,North,25 to 44,Male,DALY rate,36.4,Yes,G
2016,Non-Hodgkin's lymphoma,North,45 to 64,Male,DALY rate,124.3,No,G
2016,Non-Hodgkin's lymphoma,North,65 to 84,Male,DALY rate,541,No,G
2016,Non-Hodgkin's lymphoma,North,85 and over,Male,DALY rate,"1,462.00",No,G
2016,Non-Hodgkin's lymphoma,North,Under 15,Female,DALY rate,0.1,Yes,G
2016,Non-Hodgkin's lymphoma,North,15 to 24,Female,DALY rate,83.3,Yes,G
2016,Non-Hodgkin's lymphoma,North,25 to 44,Female,DALY rate,63.9,Yes,G
2016,Non-Hodgkin's lymphoma,North,45 to 64,Female,DALY rate,145.3,No,G
2016,Non-Hodgkin's lymphoma,North,65 to 84,Female,DALY rate,607.2,No,G
2016,Non-Hodgkin's lymphoma,North,85 and over,Female,DALY rate,585.6,No,G
2016,Non-Hodgkin's lymphoma,North,Under 15,Both sexes,DALY rate,0.2,Yes,G
2016,Non-Hodgkin's lymphoma,North,15 to 24,Both sexes,DALY rate,40.9,Yes,G
2016,Non-Hodgkin's lymphoma,North,25 to 44,Both sexes,DALY rate,50.3,Yes,G
2016,Non-Hodgkin's lymphoma,North,45 to 64,Both sexes,DALY rate,135.2,No,G
2016,Non-Hodgkin's lymphoma,North,65 to 84,Both sexes,DALY rate,570.8,No,G
2016,Non-Hodgkin's lymphoma,North,85 and over,Both sexes,DALY rate,889.1,No,G
2016,Multiple myeloma,North,Under 15,Male,DALY rate,0,Yes,G
2016,Multiple myeloma,North,15 to 24,Male,DALY rate,0,Yes,G
2016,Multiple myeloma,North,25 to 44,Male,DALY rate,1.1,Yes,G
2016,Multiple myeloma,North,45 to 64,Male,DALY rate,135.7,No,G
2016,Multiple myeloma,North,65 to 84,Male,DALY rate,474.1,No,G
2016,Multiple myeloma,North,85 and over,Male,DALY rate,836.8,No,G
2016,Multiple myeloma,North,Under 15,Female,DALY rate,0,Yes,G
2016,Multiple myeloma,North,15 to 24,Female,DALY rate,0,Yes,G
2016,Multiple myeloma,North,25 to 44,Female,DALY rate,0.2,Yes,G
2016,Multiple myeloma,North,45 to 64,Female,DALY rate,69.8,Yes,G
2016,Multiple myeloma,North,65 to 84,Female,DALY rate,275.6,No,G
2016,Multiple myeloma,North,85 and over,Female,DALY rate,214.2,No,G
2016,Multiple myeloma,North,Under 15,Both sexes,DALY rate,0,Yes,G
2016,Multiple myeloma,North,15 to 24,Both sexes,DALY rate,0,Yes,G
2016,Multiple myeloma,North,25 to 44,Both sexes,DALY rate,0.6,Yes,G
2016,Multiple myeloma,North,45 to 64,Both sexes,DALY rate,102.2,No,G
2016,Multiple myeloma,North,65 to 84,Both sexes,DALY rate,370.6,No,G
2016,Multiple myeloma,North,85 and over,Both sexes,DALY rate,419.7,No,G
2016,Leukaemia,North,Under 15,Male,DALY rate,2.8,Yes,G
2016,Leukaemia,North,15 to 24,Male,DALY rate,91.2,Yes,G
2016,Leukaemia,North,25 to 44,Male,DALY rate,37.4,Yes,G
2016,Leukaemia,North,45 to 64,Male,DALY rate,149.4,No,G
2016,Leukaemia,North,65 to 84,Male,DALY rate,788.1,No,G
2016,Leukaemia,North,85 and over,Male,DALY rate,816.2,No,G
2016,Leukaemia,North,Under 15,Female,DALY rate,5.8,Yes,G
2016,Leukaemia,North,15 to 24,Female,DALY rate,84,Yes,G
2016,Leukaemia,North,25 to 44,Female,DALY rate,0.9,Yes,G
2016,Leukaemia,North,45 to 64,Female,DALY rate,73.5,Yes,G
2016,Leukaemia,North,65 to 84,Female,DALY rate,446.6,No,G
2016,Leukaemia,North,85 and over,Female,DALY rate,345,No,G
2016,Leukaemia,North,Under 15,Both sexes,DALY rate,4.2,Yes,G
2016,Leukaemia,North,15 to 24,Both sexes,DALY rate,88,Yes,G
2016,Leukaemia,North,25 to 44,Both sexes,DALY rate,19,Yes,G
2016,Leukaemia,North,45 to 64,Both sexes,DALY rate,110.9,No,G
2016,Leukaemia,North,65 to 84,Both sexes,DALY rate,603.5,No,G
2016,Leukaemia,North,85 and over,Both sexes,DALY rate,490.8,No,G
2016,Other cancers,North,Under 15,Male,DALY rate,226.4,Yes,G
2016,Other cancers,North,15 to 24,Male,DALY rate,262.4,Yes,G
2016,Other cancers,North,25 to 44,Male,DALY rate,561.2,No,G
2016,Other cancers,North,45 to 64,Male,DALY rate,"1,410.00",No,G
2016,Other cancers,North,65 to 84,Male,DALY rate,"3,373.00",No,G
2016,Other cancers,North,85 and over,Male,DALY rate,"3,986.90",No,G
2016,Other cancers,North,Under 15,Female,DALY rate,95.2,Yes,G
2016,Other cancers,North,15 to 24,Female,DALY rate,100.5,Yes,G
2016,Other cancers,North,25 to 44,Female,DALY rate,444.7,No,G
2016,Other cancers,North,45 to 64,Female,DALY rate,"1,098.60",No,G
2016,Other cancers,North,65 to 84,Female,DALY rate,"2,689.70",No,G
2016,Other cancers,North,85 and over,Female,DALY rate,"3,042.70",No,G
2016,Other cancers,North,Under 15,Both sexes,DALY rate,162.5,Yes,G
2016,Other cancers,North,15 to 24,Both sexes,DALY rate,183.9,Yes,G
2016,Other cancers,North,25 to 44,Both sexes,DALY rate,503.2,No,G
2016,Other cancers,North,45 to 64,Both sexes,DALY rate,"1,252.00",No,G
2016,Other cancers,North,65 to 84,Both sexes,DALY rate,"2,995.20",No,G
2016,Other cancers,North,85 and over,Both sexes,DALY rate,"3,395.70",No,G
2016,Ischaemic heart disease,North,Under 15,Male,DALY rate,0.7,Yes,G
2016,Ischaemic heart disease,North,15 to 24,Male,DALY rate,0.8,Yes,G
2016,Ischaemic heart disease,North,25 to 44,Male,DALY rate,503.3,No,G
2016,Ischaemic heart disease,North,45 to 64,Male,DALY rate,"3,769.90",No,G
2016,Ischaemic heart disease,North,65 to 84,Male,DALY rate,"10,277.70",No,G
2016,Ischaemic heart disease,North,85 and over,Male,DALY rate,"25,022.80",No,G
2016,Ischaemic heart disease,North,Under 15,Female,DALY rate,0.6,Yes,G
2016,Ischaemic heart disease,North,15 to 24,Female,DALY rate,0.8,Yes,G
2016,Ischaemic heart disease,North,25 to 44,Female,DALY rate,51.3,Yes,G
2016,Ischaemic heart disease,North,45 to 64,Female,DALY rate,991.4,No,G
2016,Ischaemic heart disease,North,65 to 84,Female,DALY rate,"4,780.80",No,G
2016,Ischaemic heart disease,North,85 and over,Female,DALY rate,"16,084.50",No,G
2016,Ischaemic heart disease,North,Under 15,Both sexes,DALY rate,0.6,Yes,G
2016,Ischaemic heart disease,North,15 to 24,Both sexes,DALY rate,0.8,Yes,G
2016,Ischaemic heart disease,North,25 to 44,Both sexes,DALY rate,274.1,No,G
2016,Ischaemic heart disease,North,45 to 64,Both sexes,DALY rate,"2,358.80",No,G
2016,Ischaemic heart disease,North,65 to 84,Both sexes,DALY rate,"7,326.80",No,G
2016,Ischaemic heart disease,North,85 and over,Both sexes,DALY rate,"19,003.10",No,G
2016,Cerebrovascular disease,North,Under 15,Male,DALY rate,10.1,Yes,G
2016,Cerebrovascular disease,North,15 to 24,Male,DALY rate,13.9,Yes,G
2016,Cerebrovascular disease,North,25 to 44,Male,DALY rate,187.5,Yes,G
2016,Cerebrovascular disease,North,45 to 64,Male,DALY rate,"1,085.30",No,G
2016,Cerebrovascular disease,North,65 to 84,Male,DALY rate,"5,120.70",No,G
2016,Cerebrovascular disease,North,85 and over,Male,DALY rate,"19,482.30",No,G
2016,Cerebrovascular disease,North,Under 15,Female,DALY rate,6.7,Yes,G
2016,Cerebrovascular disease,North,15 to 24,Female,DALY rate,9,Yes,G
2016,Cerebrovascular disease,North,25 to 44,Female,DALY rate,210.2,No,G
2016,Cerebrovascular disease,North,45 to 64,Female,DALY rate,751,No,G
2016,Cerebrovascular disease,North,65 to 84,Female,DALY rate,"4,366.30",No,G
2016,Cerebrovascular disease,North,85 and over,Female,DALY rate,"18,057.80",No,G
2016,Cerebrovascular disease,North,Under 15,Both sexes,DALY rate,8.4,Yes,G
2016,Cerebrovascular disease,North,15 to 24,Both sexes,DALY rate,11.5,Yes,G
2016,Cerebrovascular disease,North,25 to 44,Both sexes,DALY rate,199.3,No,G
2016,Cerebrovascular disease,North,45 to 64,Both sexes,DALY rate,915.1,No,G
2016,Cerebrovascular disease,North,65 to 84,Both sexes,DALY rate,"4,722.20",No,G
2016,Cerebrovascular disease,North,85 and over,Both sexes,DALY rate,"18,561.00",No,G
2016,Atrial fibrillation and flutter,North,Under 15,Male,DALY rate,0.2,Yes,G
2016,Atrial fibrillation and flutter,North,15 to 24,Male,DALY rate,2.8,Yes,G
2016,Atrial fibrillation and flutter,North,25 to 44,Male,DALY rate,51.3,Yes,G
2016,Atrial fibrillation and flutter,North,45 to 64,Male,DALY rate,150.7,Yes,G
2016,Atrial fibrillation and flutter,North,65 to 84,Male,DALY rate,"1,504.40",No,G
2016,Atrial fibrillation and flutter,North,85 and over,Male,DALY rate,"4,567.00",No,G
2016,Atrial fibrillation and flutter,North,Under 15,Female,DALY rate,0.2,Yes,G
2016,Atrial fibrillation and flutter,North,15 to 24,Female,DALY rate,0.7,Yes,G
2016,Atrial fibrillation and flutter,North,25 to 44,Female,DALY rate,6.2,Yes,G
2016,Atrial fibrillation and flutter,North,45 to 64,Female,DALY rate,71.6,Yes,G
2016,Atrial fibrillation and flutter,North,65 to 84,Female,DALY rate,"1,062.30",No,G
2016,Atrial fibrillation and flutter,North,85 and over,Female,DALY rate,"5,472.00",No,G
2016,Atrial fibrillation and flutter,North,Under 15,Both sexes,DALY rate,0.2,Yes,G
2016,Atrial fibrillation and flutter,North,15 to 24,Both sexes,DALY rate,1.8,Yes,G
2016,Atrial fibrillation and flutter,North,25 to 44,Both sexes,DALY rate,28.5,Yes,G
2016,Atrial fibrillation and flutter,North,45 to 64,Both sexes,DALY rate,110.7,Yes,G
2016,Atrial fibrillation and flutter,North,65 to 84,Both sexes,DALY rate,"1,269.70",No,G
2016,Atrial fibrillation and flutter,North,85 and over,Both sexes,DALY rate,"5,193.70",No,G
2016,Peripheral vascular disease,North,Under 15,Male,DALY rate,0,Yes,G
2016,Peripheral vascular disease,North,15 to 24,Male,DALY rate,0,Yes,G
2016,Peripheral vascular disease,North,25 to 44,Male,DALY rate,2.1,Yes,G
2016,Peripheral vascular disease,North,45 to 64,Male,DALY rate,37,Yes,G
2016,Peripheral vascular disease,North,65 to 84,Male,DALY rate,236.2,No,G
2016,Peripheral vascular disease,North,85 and over,Male,DALY rate,"1,251.30",No,G
2016,Peripheral vascular disease,North,Under 15,Female,DALY rate,0,Yes,G
2016,Peripheral vascular disease,North,15 to 24,Female,DALY rate,0,Yes,G
2016,Peripheral vascular disease,North,25 to 44,Female,DALY rate,4.9,Yes,G
2016,Peripheral vascular disease,North,45 to 64,Female,DALY rate,8.5,Yes,G
2016,Peripheral vascular disease,North,65 to 84,Female,DALY rate,362.2,No,G
2016,Peripheral vascular disease,North,85 and over,Female,DALY rate,"1,570.60",No,G
2016,Peripheral vascular disease,North,Under 15,Both sexes,DALY rate,0,Yes,G
2016,Peripheral vascular disease,North,15 to 24,Both sexes,DALY rate,0,Yes,G
2016,Peripheral vascular disease,North,25 to 44,Both sexes,DALY rate,3.5,Yes,G
2016,Peripheral vascular disease,North,45 to 64,Both sexes,DALY rate,22.5,Yes,G
2016,Peripheral vascular disease,North,65 to 84,Both sexes,DALY rate,304.7,No,G
2016,Peripheral vascular disease,North,85 and over,Both sexes,DALY rate,"1,476.80",No,G
2016,Other cardiovascular and circulatory diseases,North,Under 15,Male,DALY rate,106.5,Yes,G
2016,Other cardiovascular and circulatory diseases,North,15 to 24,Male,DALY rate,44.4,Yes,G
2016,Other cardiovascular and circulatory diseases,North,25 to 44,Male,DALY rate,206.9,Yes,G
2016,Other cardiovascular and circulatory diseases,North,45 to 64,Male,DALY rate,"1,039.00",No,G
2016,Other cardiovascular and circulatory diseases,North,65 to 84,Male,DALY rate,"3,299.10",No,G
2016,Other cardiovascular and circulatory diseases,North,85 and over,Male,DALY rate,"8,270.30",No,G
2016,Other cardiovascular and circulatory diseases,North,Under 15,Female,DALY rate,28.9,Yes,G
2016,Other cardiovascular and circulatory diseases,North,15 to 24,Female,DALY rate,120,Yes,G
2016,Other cardiovascular and circulatory diseases,North,25 to 44,Female,DALY rate,194.6,Yes,G
2016,Other cardiovascular and circulatory diseases,North,45 to 64,Female,DALY rate,597,No,G
2016,Other cardiovascular and circulatory diseases,North,65 to 84,Female,DALY rate,"2,071.20",No,G
2016,Other cardiovascular and circulatory diseases,North,85 and over,Female,DALY rate,"6,837.90",No,G
2016,Other cardiovascular and circulatory diseases,North,Under 15,Both sexes,DALY rate,68.7,Yes,G
2016,Other cardiovascular and circulatory diseases,North,15 to 24,Both sexes,DALY rate,81.1,Yes,G
2016,Other cardiovascular and circulatory diseases,North,25 to 44,Both sexes,DALY rate,200.7,No,G
2016,Other cardiovascular and circulatory diseases,North,45 to 64,Both sexes,DALY rate,814.7,No,G
2016,Other cardiovascular and circulatory diseases,North,65 to 84,Both sexes,DALY rate,"2,647.20",No,G
2016,Other cardiovascular and circulatory diseases,North,85 and over,Both sexes,DALY rate,"7,332.40",No,G
2016,Asthma,North,Under 15,Male,DALY rate,509.6,Yes,A
2016,Asthma,North,15 to 24,Male,DALY rate,442.3,Yes,A
2016,Asthma,North,25 to 44,Male,DALY rate,306.6,Yes,A
2016,Asthma,North,45 to 64,Male,DALY rate,258.6,No,A
2016,Asthma,North,65 to 84,Male,DALY rate,142.2,Yes,A
2016,Asthma,North,85 and over,Male,DALY rate,542,No,A
2016,Asthma,North,Under 15,Female,DALY rate,309.7,Yes,A
2016,Asthma,North,15 to 24,Female,DALY rate,463.9,Yes,A
2016,Asthma,North,25 to 44,Female,DALY rate,385.6,Yes,A
2016,Asthma,North,45 to 64,Female,DALY rate,277,Yes,A
2016,Asthma,North,65 to 84,Female,DALY rate,319.1,No,A
2016,Asthma,North,85 and over,Female,DALY rate,534,No,A
2016,Asthma,North,Under 15,Both sexes,DALY rate,412,Yes,A
2016,Asthma,North,15 to 24,Both sexes,DALY rate,453,Yes,A
2016,Asthma,North,25 to 44,Both sexes,DALY rate,345.8,Yes,A
2016,Asthma,North,45 to 64,Both sexes,DALY rate,268,No,A
2016,Asthma,North,65 to 84,Both sexes,DALY rate,236.8,No,A
2016,Asthma,North,85 and over,Both sexes,DALY rate,538.9,No,A
2016,Chronic obstructive pulmonary disease,North,Under 15,Male,DALY rate,0.3,Yes,G
2016,Chronic obstructive pulmonary disease,North,15 to 24,Male,DALY rate,10.4,Yes,G
2016,Chronic obstructive pulmonary disease,North,25 to 44,Male,DALY rate,136.3,Yes,G
2016,Chronic obstructive pulmonary disease,North,45 to 64,Male,DALY rate,934.7,No,G
2016,Chronic obstructive pulmonary disease,North,65 to 84,Male,DALY rate,"4,362.30",No,G
2016,Chronic obstructive pulmonary disease,North,85 and over,Male,DALY rate,"8,161.70",No,G
2016,Chronic obstructive pulmonary disease,North,Under 15,Female,DALY rate,0.2,Yes,G
2016,Chronic obstructive pulmonary disease,North,15 to 24,Female,DALY rate,14.6,Yes,G
2016,Chronic obstructive pulmonary disease,North,25 to 44,Female,DALY rate,94.9,Yes,G
2016,Chronic obstructive pulmonary disease,North,45 to 64,Female,DALY rate,"1,174.50",No,G
2016,Chronic obstructive pulmonary disease,North,65 to 84,Female,DALY rate,"3,807.00",No,G
2016,Chronic obstructive pulmonary disease,North,85 and over,Female,DALY rate,"4,886.70",No,G
2016,Chronic obstructive pulmonary disease,North,Under 15,Both sexes,DALY rate,0.3,Yes,G
2016,Chronic obstructive pulmonary disease,North,15 to 24,Both sexes,DALY rate,12.4,Yes,G
2016,Chronic obstructive pulmonary disease,North,25 to 44,Both sexes,DALY rate,115.4,Yes,G
2016,Chronic obstructive pulmonary disease,North,45 to 64,Both sexes,DALY rate,"1,055.60",No,G
2016,Chronic obstructive pulmonary disease,North,65 to 84,Both sexes,DALY rate,"4,050.30",No,G
2016,Chronic obstructive pulmonary disease,North,85 and over,Both sexes,DALY rate,"5,942.40",No,G
2016,Other chronic respiratory diseases,North,Under 15,Male,DALY rate,0.9,Yes,G
2016,Other chronic respiratory diseases,North,15 to 24,Male,DALY rate,2.3,Yes,G
2016,Other chronic respiratory diseases,North,25 to 44,Male,DALY rate,8.7,Yes,G
2016,Other chronic respiratory diseases,North,45 to 64,Male,DALY rate,256,No,G
2016,Other chronic respiratory diseases,North,65 to 84,Male,DALY rate,"1,064.50",No,G
2016,Other chronic respiratory diseases,North,85 and over,Male,DALY rate,"2,931.80",No,G
2016,Other chronic respiratory diseases,North,Under 15,Female,DALY rate,0.7,Yes,G
2016,Other chronic respiratory diseases,North,15 to 24,Female,DALY rate,1,Yes,G
2016,Other chronic respiratory diseases,North,25 to 44,Female,DALY rate,35.5,Yes,G
2016,Other chronic respiratory diseases,North,45 to 64,Female,DALY rate,153.9,No,G
2016,Other chronic respiratory diseases,North,65 to 84,Female,DALY rate,652.5,No,G
2016,Other chronic respiratory diseases,North,85 and over,Female,DALY rate,745.4,No,G
2016,Other chronic respiratory diseases,North,Under 15,Both sexes,DALY rate,0.8,Yes,G
2016,Other chronic respiratory diseases,North,15 to 24,Both sexes,DALY rate,1.7,Yes,G
2016,Other chronic respiratory diseases,North,25 to 44,Both sexes,DALY rate,22.3,Yes,G
2016,Other chronic respiratory diseases,North,45 to 64,Both sexes,DALY rate,204.2,No,G
2016,Other chronic respiratory diseases,North,65 to 84,Both sexes,DALY rate,834.9,No,G
2016,Other chronic respiratory diseases,North,85 and over,Both sexes,DALY rate,"1,477.10",No,G
2016,Alcohol use disorders,North,Under 15,Male,DALY rate,0,Yes,A
2016,Alcohol use disorders,North,15 to 24,Male,DALY rate,181.7,Yes,A
2016,Alcohol use disorders,North,25 to 44,Male,DALY rate,778,No,A
2016,Alcohol use disorders,North,45 to 64,Male,DALY rate,"1,404.00",No,A
2016,Alcohol use disorders,North,65 to 84,Male,DALY rate,"1,243.20",No,A
2016,Alcohol use disorders,North,85 and over,Male,DALY rate,452.3,Yes,A
2016,Alcohol use disorders,North,Under 15,Female,DALY rate,0,Yes,A
2016,Alcohol use disorders,North,15 to 24,Female,DALY rate,67.6,Yes,A
2016,Alcohol use disorders,North,25 to 44,Female,DALY rate,223.6,Yes,A
2016,Alcohol use disorders,North,45 to 64,Female,DALY rate,501,No,A
2016,Alcohol use disorders,North,65 to 84,Female,DALY rate,237,No,A
2016,Alcohol use disorders,North,85 and over,Female,DALY rate,41.1,Yes,A
2016,Alcohol use disorders,North,Under 15,Both sexes,DALY rate,0,Yes,A
2016,Alcohol use disorders,North,15 to 24,Both sexes,DALY rate,126.3,Yes,A
2016,Alcohol use disorders,North,25 to 44,Both sexes,DALY rate,499.5,No,A
2016,Alcohol use disorders,North,45 to 64,Both sexes,DALY rate,945.3,No,A
2016,Alcohol use disorders,North,65 to 84,Both sexes,DALY rate,715.2,No,A
2016,Alcohol use disorders,North,85 and over,Both sexes,DALY rate,189.6,Yes,A
2016,Drug use disorders,North,Under 15,Male,DALY rate,0.3,Yes,A
2016,Drug use disorders,North,15 to 24,Male,DALY rate,"1,415.40",No,A
2016,Drug use disorders,North,25 to 44,Male,DALY rate,"2,906.70",No,A
2016,Drug use disorders,North,45 to 64,Male,DALY rate,841.4,No,A
2016,Drug use disorders,North,65 to 84,Male,DALY rate,30.8,Yes,A
2016,Drug use disorders,North,85 and over,Male,DALY rate,10.7,Yes,A
2016,Drug use disorders,North,Under 15,Female,DALY rate,1.3,Yes,A
2016,Drug use disorders,North,15 to 24,Female,DALY rate,348.1,Yes,A
2016,Drug use disorders,North,25 to 44,Female,DALY rate,"1,135.10",No,A
2016,Drug use disorders,North,45 to 64,Female,DALY rate,572.5,No,A
2016,Drug use disorders,North,65 to 84,Female,DALY rate,47.4,Yes,A
2016,Drug use disorders,North,85 and over,Female,DALY rate,8.4,Yes,A
2016,Drug use disorders,North,Under 15,Both sexes,DALY rate,0.8,Yes,A
2016,Drug use disorders,North,15 to 24,Both sexes,DALY rate,897.2,No,A
2016,Drug use disorders,North,25 to 44,Both sexes,DALY rate,"2,023.40",No,A
2016,Drug use disorders,North,45 to 64,Both sexes,DALY rate,704.5,No,A
2016,Drug use disorders,North,65 to 84,Both sexes,DALY rate,39.4,Yes,A
2016,Drug use disorders,North,85 and over,Both sexes,DALY rate,9.3,Yes,A
2016,Peptic ulcer disease,North,Under 15,Male,DALY rate,0,Yes,G
2016,Peptic ulcer disease,North,15 to 24,Male,DALY rate,0.3,Yes,G
2016,Peptic ulcer disease,North,25 to 44,Male,DALY rate,0.9,Yes,G
2016,Peptic ulcer disease,North,45 to 64,Male,DALY rate,52.1,Yes,G
2016,Peptic ulcer disease,North,65 to 84,Male,DALY rate,392.2,No,G
2016,Peptic ulcer disease,North,85 and over,Male,DALY rate,523,No,G
2016,Peptic ulcer disease,North,Under 15,Female,DALY rate,0,Yes,G
2016,Peptic ulcer disease,North,15 to 24,Female,DALY rate,0.2,Yes,G
2016,Peptic ulcer disease,North,25 to 44,Female,DALY rate,2,Yes,G
2016,Peptic ulcer disease,North,45 to 64,Female,DALY rate,17.1,Yes,G
2016,Peptic ulcer disease,North,65 to 84,Female,DALY rate,150.4,No,G
2016,Peptic ulcer disease,North,85 and over,Female,DALY rate,547,No,G
2016,Peptic ulcer disease,North,Under 15,Both sexes,DALY rate,0,Yes,G
2016,Peptic ulcer disease,North,15 to 24,Both sexes,DALY rate,0.3,Yes,G
2016,Peptic ulcer disease,North,25 to 44,Both sexes,DALY rate,1.4,Yes,G
2016,Peptic ulcer disease,North,45 to 64,Both sexes,DALY rate,34.4,Yes,G
2016,Peptic ulcer disease,North,65 to 84,Both sexes,DALY rate,258,No,G
2016,Peptic ulcer disease,North,85 and over,Both sexes,DALY rate,532.7,No,G
2016,Inflammatory bowel disease,North,Under 15,Male,DALY rate,7.5,Yes,A
2016,Inflammatory bowel disease,North,15 to 24,Male,DALY rate,52.2,Yes,A
2016,Inflammatory bowel disease,North,25 to 44,Male,DALY rate,100.1,Yes,A
2016,Inflammatory bowel disease,North,45 to 64,Male,DALY rate,155.1,Yes,A
2016,Inflammatory bowel disease,North,65 to 84,Male,DALY rate,180.3,Yes,A
2016,Inflammatory bowel disease,North,85 and over,Male,DALY rate,186.6,Yes,A
2016,Inflammatory bowel disease,North,Under 15,Female,DALY rate,6.2,Yes,A
2016,Inflammatory bowel disease,North,15 to 24,Female,DALY rate,40,Yes,A
2016,Inflammatory bowel disease,North,25 to 44,Female,DALY rate,108.7,Yes,A
2016,Inflammatory bowel disease,North,45 to 64,Female,DALY rate,137.2,Yes,A
2016,Inflammatory bowel disease,North,65 to 84,Female,DALY rate,211.9,No,A
2016,Inflammatory bowel disease,North,85 and over,Female,DALY rate,269.7,Yes,A
2016,Inflammatory bowel disease,North,Under 15,Both sexes,DALY rate,6.9,Yes,A
2016,Inflammatory bowel disease,North,15 to 24,Both sexes,DALY rate,46.3,Yes,A
2016,Inflammatory bowel disease,North,25 to 44,Both sexes,DALY rate,104.4,Yes,A
2016,Inflammatory bowel disease,North,45 to 64,Both sexes,DALY rate,146.1,Yes,A
2016,Inflammatory bowel disease,North,65 to 84,Both sexes,DALY rate,198.2,No,A
2016,Inflammatory bowel disease,North,85 and over,Both sexes,DALY rate,243.9,No,A
2016,Gallbladder and biliary diseases,North,Under 15,Male,DALY rate,0.5,Yes,A
2016,Gallbladder and biliary diseases,North,15 to 24,Male,DALY rate,3.5,Yes,A
2016,Gallbladder and biliary diseases,North,25 to 44,Male,DALY rate,16.7,Yes,A
2016,Gallbladder and biliary diseases,North,45 to 64,Male,DALY rate,100.4,Yes,A
2016,Gallbladder and biliary diseases,North,65 to 84,Male,DALY rate,360.7,No,A
2016,Gallbladder and biliary diseases,North,85 and over,Male,DALY rate,683.3,No,A
2016,Gallbladder and biliary diseases,North,Under 15,Female,DALY rate,0.9,Yes,A
2016,Gallbladder and biliary diseases,North,15 to 24,Female,DALY rate,23.9,Yes,A
2016,Gallbladder and biliary diseases,North,25 to 44,Female,DALY rate,74.5,Yes,A
2016,Gallbladder and biliary diseases,North,45 to 64,Female,DALY rate,91.3,Yes,A
2016,Gallbladder and biliary diseases,North,65 to 84,Female,DALY rate,380.7,No,A
2016,Gallbladder and biliary diseases,North,85 and over,Female,DALY rate,845.8,No,A
2016,Gallbladder and biliary diseases,North,Under 15,Both sexes,DALY rate,0.7,Yes,A
2016,Gallbladder and biliary diseases,North,15 to 24,Both sexes,DALY rate,13.4,Yes,A
2016,Gallbladder and biliary diseases,North,25 to 44,Both sexes,DALY rate,45.6,Yes,A
2016,Gallbladder and biliary diseases,North,45 to 64,Both sexes,DALY rate,95.8,Yes,A
2016,Gallbladder and biliary diseases,North,65 to 84,Both sexes,DALY rate,371.3,No,A
2016,Gallbladder and biliary diseases,North,85 and over,Both sexes,DALY rate,785.8,No,A
2016,Pancreatitis,North,Under 15,Male,DALY rate,1.1,Yes,G
2016,Pancreatitis,North,15 to 24,Male,DALY rate,3.5,Yes,G
2016,Pancreatitis,North,25 to 44,Male,DALY rate,117.6,Yes,G
2016,Pancreatitis,North,45 to 64,Male,DALY rate,132.9,No,G
2016,Pancreatitis,North,65 to 84,Male,DALY rate,206.8,No,G
2016,Pancreatitis,North,85 and over,Male,DALY rate,315.8,Yes,G
2016,Pancreatitis,North,Under 15,Female,DALY rate,1.5,Yes,G
2016,Pancreatitis,North,15 to 24,Female,DALY rate,3.1,Yes,G
2016,Pancreatitis,North,25 to 44,Female,DALY rate,76.6,Yes,G
2016,Pancreatitis,North,45 to 64,Female,DALY rate,53.5,Yes,G
2016,Pancreatitis,North,65 to 84,Female,DALY rate,225.6,No,G
2016,Pancreatitis,North,85 and over,Female,DALY rate,164.3,Yes,G
2016,Pancreatitis,North,Under 15,Both sexes,DALY rate,1.3,Yes,G
2016,Pancreatitis,North,15 to 24,Both sexes,DALY rate,3.4,Yes,G
2016,Pancreatitis,North,25 to 44,Both sexes,DALY rate,97.1,No,G
2016,Pancreatitis,North,45 to 64,Both sexes,DALY rate,92.5,No,G
2016,Pancreatitis,North,65 to 84,Both sexes,DALY rate,215.8,No,G
2016,Pancreatitis,North,85 and over,Both sexes,DALY rate,208.6,No,G
2016,Cirrhosis and other chronic liver diseases,North,Under 15,Male,DALY rate,1.8,Yes,G
2016,Cirrhosis and other chronic liver diseases,North,15 to 24,Male,DALY rate,4.2,Yes,G
2016,Cirrhosis and other chronic liver diseases,North,25 to 44,Male,DALY rate,419.3,No,G
2016,Cirrhosis and other chronic liver diseases,North,45 to 64,Male,DALY rate,"1,533.10",No,G
2016,Cirrhosis and other chronic liver diseases,North,65 to 84,Male,DALY rate,"1,357.90",No,G
2016,Cirrhosis and other chronic liver diseases,North,85 and over,Male,DALY rate,324.3,Yes,G
2016,Cirrhosis and other chronic liver diseases,North,Under 15,Female,DALY rate,1.1,Yes,G
2016,Cirrhosis and other chronic liver diseases,North,15 to 24,Female,DALY rate,4.3,Yes,G
2016,Cirrhosis and other chronic liver diseases,North,25 to 44,Female,DALY rate,401.4,No,G
2016,Cirrhosis and other chronic liver diseases,North,45 to 64,Female,DALY rate,746.6,No,G
2016,Cirrhosis and other chronic liver diseases,North,65 to 84,Female,DALY rate,539,No,G
2016,Cirrhosis and other chronic liver diseases,North,85 and over,Female,DALY rate,220.9,Yes,G
2016,Cirrhosis and other chronic liver diseases,North,Under 15,Both sexes,DALY rate,1.5,Yes,G
2016,Cirrhosis and other chronic liver diseases,North,15 to 24,Both sexes,DALY rate,4.3,Yes,G
2016,Cirrhosis and other chronic liver diseases,North,25 to 44,Both sexes,DALY rate,411.1,No,G
2016,Cirrhosis and other chronic liver diseases,North,45 to 64,Both sexes,DALY rate,"1,134.90",No,G
2016,Cirrhosis and other chronic liver diseases,North,65 to 84,Both sexes,DALY rate,925.9,No,G
2016,Cirrhosis and other chronic liver diseases,North,85 and over,Both sexes,DALY rate,257,No,G
2016,Other digestive diseases,North,Under 15,Male,DALY rate,91.9,Yes,A
2016,Other digestive diseases,North,15 to 24,Male,DALY rate,12.4,Yes,A
2016,Other digestive diseases,North,25 to 44,Male,DALY rate,99,Yes,A
2016,Other digestive diseases,North,45 to 64,Male,DALY rate,405.1,No,A
2016,Other digestive diseases,North,65 to 84,Male,DALY rate,"1,013.90",No,A
2016,Other digestive diseases,North,85 and over,Male,DALY rate,"2,139.60",No,A
2016,Other digestive diseases,North,Under 15,Female,DALY rate,89.5,Yes,A
2016,Other digestive diseases,North,15 to 24,Female,DALY rate,6.4,Yes,A
2016,Other digestive diseases,North,25 to 44,Female,DALY rate,55,Yes,A
2016,Other digestive diseases,North,45 to 64,Female,DALY rate,203.1,No,A
2016,Other digestive diseases,North,65 to 84,Female,DALY rate,"1,389.90",No,A
2016,Other digestive diseases,North,85 and over,Female,DALY rate,"3,004.50",No,A
2016,Other digestive diseases,North,Under 15,Both sexes,DALY rate,90.8,Yes,A
2016,Other digestive diseases,North,15 to 24,Both sexes,DALY rate,9.5,Yes,A
2016,Other digestive diseases,North,25 to 44,Both sexes,DALY rate,77.6,Yes,A
2016,Other digestive diseases,North,45 to 64,Both sexes,DALY rate,302.7,No,A
2016,Other digestive diseases,North,65 to 84,Both sexes,DALY rate,"1,227.40",No,A
2016,Other digestive diseases,North,85 and over,Both sexes,DALY rate,"2,719.90",No,A
2016,Alzheimer's disease and other dementias,North,Under 15,Male,DALY rate,0.4,Yes,G
2016,Alzheimer's disease and other dementias,North,15 to 24,Male,DALY rate,0,Yes,G
2016,Alzheimer's disease and other dementias,North,25 to 44,Male,DALY rate,0.6,Yes,G
2016,Alzheimer's disease and other dementias,North,45 to 64,Male,DALY rate,146.4,No,G
2016,Alzheimer's disease and other dementias,North,65 to 84,Male,DALY rate,"3,985.10",No,G
2016,Alzheimer's disease and other dementias,North,85 and over,Male,DALY rate,"26,583.00",No,G
2016,Alzheimer's disease and other dementias,North,Under 15,Female,DALY rate,0.4,Yes,G
2016,Alzheimer's disease and other dementias,North,15 to 24,Female,DALY rate,0,Yes,G
2016,Alzheimer's disease and other dementias,North,25 to 44,Female,DALY rate,2.1,Yes,G
2016,Alzheimer's disease and other dementias,North,45 to 64,Female,DALY rate,164.6,No,G
2016,Alzheimer's disease and other dementias,North,65 to 84,Female,DALY rate,"4,583.40",No,G
2016,Alzheimer's disease and other dementias,North,85 and over,Female,DALY rate,"31,701.90",No,G
2016,Alzheimer's disease and other dementias,North,Under 15,Both sexes,DALY rate,0.4,Yes,G
2016,Alzheimer's disease and other dementias,North,15 to 24,Both sexes,DALY rate,0,Yes,G
2016,Alzheimer's disease and other dementias,North,25 to 44,Both sexes,DALY rate,1.3,Yes,G
2016,Alzheimer's disease and other dementias,North,45 to 64,Both sexes,DALY rate,155.5,No,G
2016,Alzheimer's disease and other dementias,North,65 to 84,Both sexes,DALY rate,"4,327.50",No,G
2016,Alzheimer's disease and other dementias,North,85 and over,Both sexes,DALY rate,"30,137.70",No,G
2016,Parkinson's disease,North,Under 15,Male,DALY rate,0.9,Yes,G
2016,Parkinson's disease,North,15 to 24,Male,DALY rate,0,Yes,G
2016,Parkinson's disease,North,25 to 44,Male,DALY rate,1.4,Yes,G
2016,Parkinson's disease,North,45 to 64,Male,DALY rate,65,Yes,G
2016,Parkinson's disease,North,65 to 84,Male,DALY rate,857.4,No,G
2016,Parkinson's disease,North,85 and over,Male,DALY rate,"2,110.50",No,G
2016,Parkinson's disease,North,Under 15,Female,DALY rate,0,Yes,G
2016,Parkinson's disease,North,15 to 24,Female,DALY rate,0,Yes,G
2016,Parkinson's disease,North,25 to 44,Female,DALY rate,0.5,Yes,G
2016,Parkinson's disease,North,45 to 64,Female,DALY rate,92.2,Yes,G
2016,Parkinson's disease,North,65 to 84,Female,DALY rate,394.6,No,G
2016,Parkinson's disease,North,85 and over,Female,DALY rate,864.5,No,G
2016,Parkinson's disease,North,Under 15,Both sexes,DALY rate,0.5,Yes,G
2016,Parkinson's disease,North,15 to 24,Both sexes,DALY rate,0,Yes,G
2016,Parkinson's disease,North,25 to 44,Both sexes,DALY rate,1,Yes,G
2016,Parkinson's disease,North,45 to 64,Both sexes,DALY rate,78.8,No,G
2016,Parkinson's disease,North,65 to 84,Both sexes,DALY rate,598.4,No,G
2016,Parkinson's disease,North,85 and over,Both sexes,DALY rate,"1,277.20",No,G
2016,Epilepsy,North,Under 15,Male,DALY rate,61.9,Yes,A
2016,Epilepsy,North,15 to 24,Male,DALY rate,243.9,Yes,A
2016,Epilepsy,North,25 to 44,Male,DALY rate,262.3,Yes,A
2016,Epilepsy,North,45 to 64,Male,DALY rate,290.6,No,A
2016,Epilepsy,North,65 to 84,Male,DALY rate,297.3,No,A
2016,Epilepsy,North,85 and over,Male,DALY rate,401.8,Yes,A
2016,Epilepsy,North,Under 15,Female,DALY rate,213.2,Yes,A
2016,Epilepsy,North,15 to 24,Female,DALY rate,117.8,Yes,A
2016,Epilepsy,North,25 to 44,Female,DALY rate,233.6,Yes,A
2016,Epilepsy,North,45 to 64,Female,DALY rate,261.9,No,A
2016,Epilepsy,North,65 to 84,Female,DALY rate,302.3,No,A
2016,Epilepsy,North,85 and over,Female,DALY rate,373.1,No,A
2016,Epilepsy,North,Under 15,Both sexes,DALY rate,135.6,Yes,A
2016,Epilepsy,North,15 to 24,Both sexes,DALY rate,182.9,Yes,A
2016,Epilepsy,North,25 to 44,Both sexes,DALY rate,247.9,No,A
2016,Epilepsy,North,45 to 64,Both sexes,DALY rate,276,No,A
2016,Epilepsy,North,65 to 84,Both sexes,DALY rate,298.3,No,A
2016,Epilepsy,North,85 and over,Both sexes,DALY rate,387.4,No,A
2016,Multiple sclerosis,North,Under 15,Male,DALY rate,0.2,Yes,G
2016,Multiple sclerosis,North,15 to 24,Male,DALY rate,1.8,Yes,G
2016,Multiple sclerosis,North,25 to 44,Male,DALY rate,52.9,Yes,G
2016,Multiple sclerosis,North,45 to 64,Male,DALY rate,256.8,No,G
2016,Multiple sclerosis,North,65 to 84,Male,DALY rate,247.3,No,G
2016,Multiple sclerosis,North,85 and over,Male,DALY rate,11.7,Yes,G
2016,Multiple sclerosis,North,Under 15,Female,DALY rate,0.1,Yes,G
2016,Multiple sclerosis,North,15 to 24,Female,DALY rate,5.9,Yes,G
2016,Multiple sclerosis,North,25 to 44,Female,DALY rate,91.5,Yes,G
2016,Multiple sclerosis,North,45 to 64,Female,DALY rate,531.6,No,G
2016,Multiple sclerosis,North,65 to 84,Female,DALY rate,326.2,No,G
2016,Multiple sclerosis,North,85 and over,Female,DALY rate,80.1,Yes,G
2016,Multiple sclerosis,North,Under 15,Both sexes,DALY rate,0.1,Yes,G
2016,Multiple sclerosis,North,15 to 24,Both sexes,DALY rate,3.8,Yes,G
2016,Multiple sclerosis,North,25 to 44,Both sexes,DALY rate,72.2,Yes,G
2016,Multiple sclerosis,North,45 to 64,Both sexes,DALY rate,396.1,No,G
2016,Multiple sclerosis,North,65 to 84,Both sexes,DALY rate,288.9,No,G
2016,Multiple sclerosis,North,85 and over,Both sexes,DALY rate,54.8,Yes,G
2016,Headache disorders,North,Under 15,Male,DALY rate,290.9,Yes,R
2016,Headache disorders,North,15 to 24,Male,DALY rate,751.1,Yes,R
2016,Headache disorders,North,25 to 44,Male,DALY rate,870,Yes,R
2016,Headache disorders,North,45 to 64,Male,DALY rate,725.8,Yes,R
2016,Headache disorders,North,65 to 84,Male,DALY rate,389.5,Yes,R
2016,Headache disorders,North,85 and over,Male,DALY rate,227.1,Yes,R
2016,Headache disorders,North,Under 15,Female,DALY rate,325.8,Yes,R
2016,Headache disorders,North,15 to 24,Female,DALY rate,"1,539.00",Yes,R
2016,Headache disorders,North,25 to 44,Female,DALY rate,"2,155.00",Yes,R
2016,Headache disorders,North,45 to 64,Female,DALY rate,"1,612.70",Yes,R
2016,Headache disorders,North,65 to 84,Female,DALY rate,682.8,Yes,R
2016,Headache disorders,North,85 and over,Female,DALY rate,267.4,Yes,R
2016,Headache disorders,North,Under 15,Both sexes,DALY rate,307.9,Yes,R
2016,Headache disorders,North,15 to 24,Both sexes,DALY rate,"1,133.70",Yes,R
2016,Headache disorders,North,25 to 44,Both sexes,DALY rate,"1,511.60",Yes,R
2016,Headache disorders,North,45 to 64,Both sexes,DALY rate,"1,177.00",Yes,R
2016,Headache disorders,North,65 to 84,Both sexes,DALY rate,543.2,Yes,R
2016,Headache disorders,North,85 and over,Both sexes,DALY rate,252.9,Yes,R
2016,Other neurological disorders,North,Under 15,Male,DALY rate,5.8,Yes,G
2016,Other neurological disorders,North,15 to 24,Male,DALY rate,162.1,Yes,G
2016,Other neurological disorders,North,25 to 44,Male,DALY rate,174,No,G
2016,Other neurological disorders,North,45 to 64,Male,DALY rate,446.3,No,G
2016,Other neurological disorders,North,65 to 84,Male,DALY rate,572.9,No,G
2016,Other neurological disorders,North,85 and over,Male,DALY rate,476.4,No,G
2016,Other neurological disorders,North,Under 15,Female,DALY rate,81,Yes,G
2016,Other neurological disorders,North,15 to 24,Female,DALY rate,1.6,Yes,G
2016,Other neurological disorders,North,25 to 44,Female,DALY rate,17.1,Yes,G
2016,Other neurological disorders,North,45 to 64,Female,DALY rate,250.2,No,G
2016,Other neurological disorders,North,65 to 84,Female,DALY rate,463.2,No,G
2016,Other neurological disorders,North,85 and over,Female,DALY rate,376.4,No,G
2016,Other neurological disorders,North,Under 15,Both sexes,DALY rate,42.6,Yes,G
2016,Other neurological disorders,North,15 to 24,Both sexes,DALY rate,84,Yes,G
2016,Other neurological disorders,North,25 to 44,Both sexes,DALY rate,95.3,No,G
2016,Other neurological disorders,North,45 to 64,Both sexes,DALY rate,346.7,No,G
2016,Other neurological disorders,North,65 to 84,Both sexes,DALY rate,516.3,No,G
2016,Other neurological disorders,North,85 and over,Both sexes,DALY rate,426.2,No,G
2016,Schizophrenia,North,Under 15,Male,DALY rate,0,Yes,G
2016,Schizophrenia,North,15 to 24,Male,DALY rate,87,Yes,G
2016,Schizophrenia,North,25 to 44,Male,DALY rate,387.2,Yes,G
2016,Schizophrenia,North,45 to 64,Male,DALY rate,393.5,Yes,G
2016,Schizophrenia,North,65 to 84,Male,DALY rate,160.6,Yes,G
2016,Schizophrenia,North,85 and over,Male,DALY rate,76.3,Yes,G
2016,Schizophrenia,North,Under 15,Female,DALY rate,0,Yes,G
2016,Schizophrenia,North,15 to 24,Female,DALY rate,18.9,Yes,G
2016,Schizophrenia,North,25 to 44,Female,DALY rate,145.4,Yes,G
2016,Schizophrenia,North,45 to 64,Female,DALY rate,228.5,Yes,G
2016,Schizophrenia,North,65 to 84,Female,DALY rate,186.5,Yes,G
2016,Schizophrenia,North,85 and over,Female,DALY rate,248.6,No,G
2016,Schizophrenia,North,Under 15,Both sexes,DALY rate,0,Yes,G
2016,Schizophrenia,North,15 to 24,Both sexes,DALY rate,53.9,Yes,G
2016,Schizophrenia,North,25 to 44,Both sexes,DALY rate,266.1,Yes,G
2016,Schizophrenia,North,45 to 64,Both sexes,DALY rate,309.5,Yes,G
2016,Schizophrenia,North,65 to 84,Both sexes,DALY rate,174.8,Yes,G
2016,Schizophrenia,North,85 and over,Both sexes,DALY rate,191.6,No,G
2016,Depression,North,Under 15,Male,DALY rate,0,Yes,G
2016,Depression,North,15 to 24,Male,DALY rate,697.4,Yes,G
2016,Depression,North,25 to 44,Male,DALY rate,"1,519.00",Yes,G
2016,Depression,North,45 to 64,Male,DALY rate,"1,575.00",Yes,G
2016,Depression,North,65 to 84,Male,DALY rate,"1,202.80",Yes,G
2016,Depression,North,85 and over,Male,DALY rate,"1,454.50",Yes,G
2016,Depression,North,Under 15,Female,DALY rate,0,Yes,G
2016,Depression,North,15 to 24,Female,DALY rate,729.6,Yes,G
2016,Depression,North,25 to 44,Female,DALY rate,"1,464.80",Yes,G
2016,Depression,North,45 to 64,Female,DALY rate,"1,576.50",Yes,G
2016,Depression,North,65 to 84,Female,DALY rate,"1,157.50",Yes,G
2016,Depression,North,85 and over,Female,DALY rate,"1,110.10",Yes,G
2016,Depression,North,Under 15,Both sexes,DALY rate,0,Yes,G
2016,Depression,North,15 to 24,Both sexes,DALY rate,712.8,Yes,G
2016,Depression,North,25 to 44,Both sexes,DALY rate,"1,492.20",Yes,G
2016,Depression,North,45 to 64,Both sexes,DALY rate,"1,575.80",Yes,G
2016,Depression,North,65 to 84,Both sexes,DALY rate,"1,176.90",Yes,G
2016,Depression,North,85 and over,Both sexes,DALY rate,"1,216.60",Yes,G
2016,Anxiety disorders,North,Under 15,Male,DALY rate,0,Yes,G
2016,Anxiety disorders,North,15 to 24,Male,DALY rate,334.2,Yes,G
2016,Anxiety disorders,North,25 to 44,Male,DALY rate,726.4,Yes,G
2016,Anxiety disorders,North,45 to 64,Male,DALY rate,815.1,Yes,G
2016,Anxiety disorders,North,65 to 84,Male,DALY rate,660.6,Yes,G
2016,Anxiety disorders,North,85 and over,Male,DALY rate,739.5,Yes,G
2016,Anxiety disorders,North,Under 15,Female,DALY rate,0,Yes,G
2016,Anxiety disorders,North,15 to 24,Female,DALY rate,600.6,Yes,G
2016,Anxiety disorders,North,25 to 44,Female,DALY rate,"1,217.70",Yes,G
2016,Anxiety disorders,North,45 to 64,Female,DALY rate,"1,372.00",Yes,G
2016,Anxiety disorders,North,65 to 84,Female,DALY rate,"1,056.30",Yes,G
2016,Anxiety disorders,North,85 and over,Female,DALY rate,945.1,Yes,G
2016,Anxiety disorders,North,Under 15,Both sexes,DALY rate,0,Yes,G
2016,Anxiety disorders,North,15 to 24,Both sexes,DALY rate,463.4,Yes,G
2016,Anxiety disorders,North,25 to 44,Both sexes,DALY rate,972.4,Yes,G
2016,Anxiety disorders,North,45 to 64,Both sexes,DALY rate,"1,098.20",Yes,G
2016,Anxiety disorders,North,65 to 84,Both sexes,DALY rate,870.1,Yes,G
2016,Anxiety disorders,North,85 and over,Both sexes,DALY rate,864.7,Yes,G
2016,Other mental health disorders,North,Under 15,Male,DALY rate,248,Yes,R
2016,Other mental health disorders,North,15 to 24,Male,DALY rate,195.1,Yes,R
2016,Other mental health disorders,North,25 to 44,Male,DALY rate,172.1,Yes,R
2016,Other mental health disorders,North,45 to 64,Male,DALY rate,143,Yes,R
2016,Other mental health disorders,North,65 to 84,Male,DALY rate,120.5,Yes,R
2016,Other mental health disorders,North,85 and over,Male,DALY rate,355.6,Yes,R
2016,Other mental health disorders,North,Under 15,Female,DALY rate,88.3,Yes,R
2016,Other mental health disorders,North,15 to 24,Female,DALY rate,186.3,Yes,R
2016,Other mental health disorders,North,25 to 44,Female,DALY rate,242.4,Yes,R
2016,Other mental health disorders,North,45 to 64,Female,DALY rate,169.4,Yes,R
2016,Other mental health disorders,North,65 to 84,Female,DALY rate,142.1,Yes,R
2016,Other mental health disorders,North,85 and over,Female,DALY rate,404.2,Yes,R
2016,Other mental health disorders,North,Under 15,Both sexes,DALY rate,170.1,Yes,R
2016,Other mental health disorders,North,15 to 24,Both sexes,DALY rate,190.8,Yes,R
2016,Other mental health disorders,North,25 to 44,Both sexes,DALY rate,207,Yes,R
2016,Other mental health disorders,North,45 to 64,Both sexes,DALY rate,156.4,Yes,R
2016,Other mental health disorders,North,65 to 84,Both sexes,DALY rate,131.7,Yes,R
2016,Other mental health disorders,North,85 and over,Both sexes,DALY rate,389.4,Yes,R
2016,Diabetes mellitus,North,Under 15,Male,DALY rate,18.6,Yes,G
2016,Diabetes mellitus,North,15 to 24,Male,DALY rate,138.6,Yes,G
2016,Diabetes mellitus,North,25 to 44,Male,DALY rate,295.7,Yes,G
2016,Diabetes mellitus,North,45 to 64,Male,DALY rate,"1,162.80",No,G
2016,Diabetes mellitus,North,65 to 84,Male,DALY rate,"2,340.00",No,G
2016,Diabetes mellitus,North,85 and over,Male,DALY rate,"3,199.50",No,G
2016,Diabetes mellitus,North,Under 15,Female,DALY rate,19.2,Yes,G
2016,Diabetes mellitus,North,15 to 24,Female,DALY rate,54.3,Yes,G
2016,Diabetes mellitus,North,25 to 44,Female,DALY rate,155.9,Yes,G
2016,Diabetes mellitus,North,45 to 64,Female,DALY rate,560.8,No,G
2016,Diabetes mellitus,North,65 to 84,Female,DALY rate,"1,487.40",No,G
2016,Diabetes mellitus,North,85 and over,Female,DALY rate,"1,950.60",No,G
2016,Diabetes mellitus,North,Under 15,Both sexes,DALY rate,18.9,Yes,G
2016,Diabetes mellitus,North,15 to 24,Both sexes,DALY rate,97.6,Yes,G
2016,Diabetes mellitus,North,25 to 44,Both sexes,DALY rate,224.5,No,G
2016,Diabetes mellitus,North,45 to 64,Both sexes,DALY rate,856.9,No,G
2016,Diabetes mellitus,North,65 to 84,Both sexes,DALY rate,"1,890.80",No,G
2016,Diabetes mellitus,North,85 and over,Both sexes,DALY rate,"2,364.50",No,G
2016,Chronic kidney disease,North,Under 15,Male,DALY rate,0.2,Yes,A
2016,Chronic kidney disease,North,15 to 24,Male,DALY rate,1.3,Yes,A
2016,Chronic kidney disease,North,25 to 44,Male,DALY rate,6.7,Yes,A
2016,Chronic kidney disease,North,45 to 64,Male,DALY rate,313.4,No,A
2016,Chronic kidney disease,North,65 to 84,Male,DALY rate,"1,245.60",No,A
2016,Chronic kidney disease,North,85 and over,Male,DALY rate,"4,830.00",No,A
2016,Chronic kidney disease,North,Under 15,Female,DALY rate,0.4,Yes,A
2016,Chronic kidney disease,North,15 to 24,Female,DALY rate,1.7,Yes,A
2016,Chronic kidney disease,North,25 to 44,Female,DALY rate,25.9,Yes,A
2016,Chronic kidney disease,North,45 to 64,Female,DALY rate,186.2,No,A
2016,Chronic kidney disease,North,65 to 84,Female,DALY rate,"1,244.60",No,A
2016,Chronic kidney disease,North,85 and over,Female,DALY rate,"4,087.20",No,A
2016,Chronic kidney disease,North,Under 15,Both sexes,DALY rate,0.3,Yes,A
2016,Chronic kidney disease,North,15 to 24,Both sexes,DALY rate,1.5,Yes,A
2016,Chronic kidney disease,North,25 to 44,Both sexes,DALY rate,16.4,Yes,A
2016,Chronic kidney disease,North,45 to 64,Both sexes,DALY rate,249.1,No,A
2016,Chronic kidney disease,North,65 to 84,Both sexes,DALY rate,"1,253.20",No,A
2016,Chronic kidney disease,North,85 and over,Both sexes,DALY rate,"4,319.20",No,A
2016,Other diabetes and chronic kidney disorders,North,Under 15,Male,DALY rate,0,Yes,R
2016,Other diabetes and chronic kidney disorders,North,15 to 24,Male,DALY rate,0,Yes,R
2016,Other diabetes and chronic kidney disorders,North,25 to 44,Male,DALY rate,0,Yes,R
2016,Other diabetes and chronic kidney disorders,North,45 to 64,Male,DALY rate,0,Yes,R
2016,Other diabetes and chronic kidney disorders,North,65 to 84,Male,DALY rate,20.1,Yes,R
2016,Other diabetes and chronic kidney disorders,North,85 and over,Male,DALY rate,0,Yes,R
2016,Other diabetes and chronic kidney disorders,North,Under 15,Female,DALY rate,0,Yes,R
2016,Other diabetes and chronic kidney disorders,North,15 to 24,Female,DALY rate,0,Yes,R
2016,Other diabetes and chronic kidney disorders,North,25 to 44,Female,DALY rate,0,Yes,R
2016,Other diabetes and chronic kidney disorders,North,45 to 64,Female,DALY rate,0,Yes,R
2016,Other diabetes and chronic kidney disorders,North,65 to 84,Female,DALY rate,0,Yes,R
2016,Other diabetes and chronic kidney disorders,North,85 and over,Female,DALY rate,0,Yes,R
2016,Other diabetes and chronic kidney disorders,North,Under 15,Both sexes,DALY rate,0,Yes,R
2016,Other diabetes and chronic kidney disorders,North,15 to 24,Both sexes,DALY rate,0,Yes,R
2016,Other diabetes and chronic kidney disorders,North,25 to 44,Both sexes,DALY rate,0,Yes,R
2016,Other diabetes and chronic kidney disorders,North,45 to 64,Both sexes,DALY rate,0,Yes,R
2016,Other diabetes and chronic kidney disorders,North,65 to 84,Both sexes,DALY rate,9.6,Yes,R
2016,Other diabetes and chronic kidney disorders,North,85 and over,Both sexes,DALY rate,0,Yes,R
2016,Rheumatoid arthritis,North,Under 15,Male,DALY rate,0.4,Yes,A
2016,Rheumatoid arthritis,North,15 to 24,Male,DALY rate,13.9,Yes,A
2016,Rheumatoid arthritis,North,25 to 44,Male,DALY rate,54,Yes,A
2016,Rheumatoid arthritis,North,45 to 64,Male,DALY rate,167.5,Yes,A
2016,Rheumatoid arthritis,North,65 to 84,Male,DALY rate,392.7,No,A
2016,Rheumatoid arthritis,North,85 and over,Male,DALY rate,518.3,No,A
2016,Rheumatoid arthritis,North,Under 15,Female,DALY rate,5.3,Yes,A
2016,Rheumatoid arthritis,North,15 to 24,Female,DALY rate,41.8,Yes,A
2016,Rheumatoid arthritis,North,25 to 44,Female,DALY rate,167.2,Yes,A
2016,Rheumatoid arthritis,North,45 to 64,Female,DALY rate,400.3,Yes,A
2016,Rheumatoid arthritis,North,65 to 84,Female,DALY rate,572.3,No,A
2016,Rheumatoid arthritis,North,85 and over,Female,DALY rate,435.2,No,A
2016,Rheumatoid arthritis,North,Under 15,Both sexes,DALY rate,2.8,Yes,A
2016,Rheumatoid arthritis,North,15 to 24,Both sexes,DALY rate,27.5,Yes,A
2016,Rheumatoid arthritis,North,25 to 44,Both sexes,DALY rate,111,Yes,A
2016,Rheumatoid arthritis,North,45 to 64,Both sexes,DALY rate,285.6,Yes,A
2016,Rheumatoid arthritis,North,65 to 84,Both sexes,DALY rate,492.8,No,A
2016,Rheumatoid arthritis,North,85 and over,Both sexes,DALY rate,460.5,No,A
2016,Osteoarthritis,North,Under 15,Male,DALY rate,1,Yes,A
2016,Osteoarthritis,North,15 to 24,Male,DALY rate,1.4,Yes,A
2016,Osteoarthritis,North,25 to 44,Male,DALY rate,60.6,Yes,A
2016,Osteoarthritis,North,45 to 64,Male,DALY rate,505.6,Yes,A
2016,Osteoarthritis,North,65 to 84,Male,DALY rate,880.1,Yes,A
2016,Osteoarthritis,North,85 and over,Male,DALY rate,545.7,Yes,A
2016,Osteoarthritis,North,Under 15,Female,DALY rate,0,Yes,A
2016,Osteoarthritis,North,15 to 24,Female,DALY rate,2.7,Yes,A
2016,Osteoarthritis,North,25 to 44,Female,DALY rate,76,Yes,A
2016,Osteoarthritis,North,45 to 64,Female,DALY rate,743.3,Yes,A
2016,Osteoarthritis,North,65 to 84,Female,DALY rate,"1,247.20",Yes,A
2016,Osteoarthritis,North,85 and over,Female,DALY rate,766.6,Yes,A
2016,Osteoarthritis,North,Under 15,Both sexes,DALY rate,0.5,Yes,A
2016,Osteoarthritis,North,15 to 24,Both sexes,DALY rate,2,Yes,A
2016,Osteoarthritis,North,25 to 44,Both sexes,DALY rate,68.4,Yes,A
2016,Osteoarthritis,North,45 to 64,Both sexes,DALY rate,626.2,Yes,A
2016,Osteoarthritis,North,65 to 84,Both sexes,DALY rate,"1,076.40",Yes,A
2016,Osteoarthritis,North,85 and over,Both sexes,DALY rate,689.4,Yes,A
2016,Low back and neck pain,North,Under 15,Male,DALY rate,157.3,Yes,A
2016,Low back and neck pain,North,15 to 24,Male,DALY rate,645.1,Yes,A
2016,Low back and neck pain,North,25 to 44,Male,DALY rate,"1,165.10",Yes,A
2016,Low back and neck pain,North,45 to 64,Male,DALY rate,"1,402.50",Yes,A
2016,Low back and neck pain,North,65 to 84,Male,DALY rate,"1,422.30",Yes,A
2016,Low back and neck pain,North,85 and over,Male,DALY rate,"1,485.70",Yes,A
2016,Low back and neck pain,North,Under 15,Female,DALY rate,192.7,Yes,A
2016,Low back and neck pain,North,15 to 24,Female,DALY rate,"1,004.20",Yes,A
2016,Low back and neck pain,North,25 to 44,Female,DALY rate,"1,709.40",Yes,A
2016,Low back and neck pain,North,45 to 64,Female,DALY rate,"1,796.90",Yes,A
2016,Low back and neck pain,North,65 to 84,Female,DALY rate,"1,779.70",Yes,A
2016,Low back and neck pain,North,85 and over,Female,DALY rate,"1,688.20",Yes,A
2016,Low back and neck pain,North,Under 15,Both sexes,DALY rate,174.6,Yes,A
2016,Low back and neck pain,North,15 to 24,Both sexes,DALY rate,819.3,Yes,A
2016,Low back and neck pain,North,25 to 44,Both sexes,DALY rate,"1,437.20",Yes,A
2016,Low back and neck pain,North,45 to 64,Both sexes,DALY rate,"1,603.00",Yes,A
2016,Low back and neck pain,North,65 to 84,Both sexes,DALY rate,"1,613.40",Yes,A
2016,Low back and neck pain,North,85 and over,Both sexes,DALY rate,"1,614.20",Yes,A
2016,Other musculoskeletal disorders,North,Under 15,Male,DALY rate,89.9,Yes,R
2016,Other musculoskeletal disorders,North,15 to 24,Male,DALY rate,257.1,Yes,R
2016,Other musculoskeletal disorders,North,25 to 44,Male,DALY rate,313.9,Yes,R
2016,Other musculoskeletal disorders,North,45 to 64,Male,DALY rate,582.1,No,R
2016,Other musculoskeletal disorders,North,65 to 84,Male,DALY rate,588.2,No,R
2016,Other musculoskeletal disorders,North,85 and over,Male,DALY rate,776.4,Yes,R
2016,Other musculoskeletal disorders,North,Under 15,Female,DALY rate,83.7,Yes,R
2016,Other musculoskeletal disorders,North,15 to 24,Female,DALY rate,270.1,Yes,R
2016,Other musculoskeletal disorders,North,25 to 44,Female,DALY rate,387.1,Yes,R
2016,Other musculoskeletal disorders,North,45 to 64,Female,DALY rate,584.6,Yes,R
2016,Other musculoskeletal disorders,North,65 to 84,Female,DALY rate,704.1,No,R
2016,Other musculoskeletal disorders,North,85 and over,Female,DALY rate,"1,717.10",No,R
2016,Other musculoskeletal disorders,North,Under 15,Both sexes,DALY rate,86.9,Yes,R
2016,Other musculoskeletal disorders,North,15 to 24,Both sexes,DALY rate,263.5,Yes,R
2016,Other musculoskeletal disorders,North,25 to 44,Both sexes,DALY rate,350.6,Yes,R
2016,Other musculoskeletal disorders,North,45 to 64,Both sexes,DALY rate,583.4,No,R
2016,Other musculoskeletal disorders,North,65 to 84,Both sexes,DALY rate,653.8,No,R
2016,Other musculoskeletal disorders,North,85 and over,Both sexes,DALY rate,"1,402.40",No,R
2016,Congenital birth defects,North,Under 15,Male,DALY rate,"1,029.40",No,A
2016,Congenital birth defects,North,15 to 24,Male,DALY rate,438.6,Yes,A
2016,Congenital birth defects,North,25 to 44,Male,DALY rate,163.7,Yes,A
2016,Congenital birth defects,North,45 to 64,Male,DALY rate,143.2,No,A
2016,Congenital birth defects,North,65 to 84,Male,DALY rate,151.7,No,A
2016,Congenital birth defects,North,85 and over,Male,DALY rate,58.5,Yes,A
2016,Congenital birth defects,North,Under 15,Female,DALY rate,787.1,No,A
2016,Congenital birth defects,North,15 to 24,Female,DALY rate,198.2,Yes,A
2016,Congenital birth defects,North,25 to 44,Female,DALY rate,121.5,Yes,A
2016,Congenital birth defects,North,45 to 64,Female,DALY rate,165.6,No,A
2016,Congenital birth defects,North,65 to 84,Female,DALY rate,189.1,No,A
2016,Congenital birth defects,North,85 and over,Female,DALY rate,56.4,Yes,A
2016,Congenital birth defects,North,Under 15,Both sexes,DALY rate,911.3,No,A
2016,Congenital birth defects,North,15 to 24,Both sexes,DALY rate,322.4,Yes,A
2016,Congenital birth defects,North,25 to 44,Both sexes,DALY rate,142.9,Yes,A
2016,Congenital birth defects,North,45 to 64,Both sexes,DALY rate,154.7,No,A
2016,Congenital birth defects,North,65 to 84,Both sexes,DALY rate,171.6,No,A
2016,Congenital birth defects,North,85 and over,Both sexes,DALY rate,55.8,Yes,A
2016,Urinary diseases and male infertility,North,Under 15,Male,DALY rate,0.2,Yes,A
2016,Urinary diseases and male infertility,North,15 to 24,Male,DALY rate,1.8,Yes,A
2016,Urinary diseases and male infertility,North,25 to 44,Male,DALY rate,17.1,Yes,A
2016,Urinary diseases and male infertility,North,45 to 64,Male,DALY rate,263,Yes,A
2016,Urinary diseases and male infertility,North,65 to 84,Male,DALY rate,896,No,A
2016,Urinary diseases and male infertility,North,85 and over,Male,DALY rate,"2,246.90",No,A
2016,Urinary diseases and male infertility,North,Under 15,Female,DALY rate,0.8,Yes,A
2016,Urinary diseases and male infertility,North,15 to 24,Female,DALY rate,2.4,Yes,A
2016,Urinary diseases and male infertility,North,25 to 44,Female,DALY rate,34.8,Yes,A
2016,Urinary diseases and male infertility,North,45 to 64,Female,DALY rate,43.7,Yes,A
2016,Urinary diseases and male infertility,North,65 to 84,Female,DALY rate,408.8,No,A
2016,Urinary diseases and male infertility,North,85 and over,Female,DALY rate,"1,529.70",No,A
2016,Urinary diseases and male infertility,North,Under 15,Both sexes,DALY rate,0.5,Yes,A
2016,Urinary diseases and male infertility,North,15 to 24,Both sexes,DALY rate,2.1,Yes,A
2016,Urinary diseases and male infertility,North,25 to 44,Both sexes,DALY rate,26,Yes,A
2016,Urinary diseases and male infertility,North,45 to 64,Both sexes,DALY rate,151.8,No,A
2016,Urinary diseases and male infertility,North,65 to 84,Both sexes,DALY rate,636.5,No,A
2016,Urinary diseases and male infertility,North,85 and over,Both sexes,DALY rate,"1,762.80",No,A
2016,Oral disorders,North,Under 15,Male,DALY rate,16.4,Yes,A
2016,Oral disorders,North,15 to 24,Male,DALY rate,39.2,Yes,A
2016,Oral disorders,North,25 to 44,Male,DALY rate,58.5,Yes,A
2016,Oral disorders,North,45 to 64,Male,DALY rate,171.4,Yes,A
2016,Oral disorders,North,65 to 84,Male,DALY rate,529.5,Yes,A
2016,Oral disorders,North,85 and over,Male,DALY rate,801.4,Yes,A
2016,Oral disorders,North,Under 15,Female,DALY rate,16.6,Yes,A
2016,Oral disorders,North,15 to 24,Female,DALY rate,54.1,Yes,A
2016,Oral disorders,North,25 to 44,Female,DALY rate,78.5,Yes,A
2016,Oral disorders,North,45 to 64,Female,DALY rate,192.7,Yes,A
2016,Oral disorders,North,65 to 84,Female,DALY rate,590.6,Yes,A
2016,Oral disorders,North,85 and over,Female,DALY rate,"1,188.70",Yes,A
2016,Oral disorders,North,Under 15,Both sexes,DALY rate,16.5,Yes,A
2016,Oral disorders,North,15 to 24,Both sexes,DALY rate,46.5,Yes,A
2016,Oral disorders,North,25 to 44,Both sexes,DALY rate,68.5,Yes,A
2016,Oral disorders,North,45 to 64,Both sexes,DALY rate,182.1,Yes,A
2016,Oral disorders,North,65 to 84,Both sexes,DALY rate,563.5,Yes,A
2016,Oral disorders,North,85 and over,Both sexes,DALY rate,"1,055.80",Yes,A
2016,Sudden infant death syndrome,North,Under 15,Male,DALY rate,84.5,Yes,G
2016,Sudden infant death syndrome,North,15 to 24,Male,DALY rate,0,Yes,G
2016,Sudden infant death syndrome,North,25 to 44,Male,DALY rate,0,Yes,G
2016,Sudden infant death syndrome,North,45 to 64,Male,DALY rate,0,Yes,G
2016,Sudden infant death syndrome,North,65 to 84,Male,DALY rate,0,Yes,G
2016,Sudden infant death syndrome,North,85 and over,Male,DALY rate,0,Yes,G
2016,Sudden infant death syndrome,North,Under 15,Female,DALY rate,0,Yes,G
2016,Sudden infant death syndrome,North,15 to 24,Female,DALY rate,0,Yes,G
2016,Sudden infant death syndrome,North,25 to 44,Female,DALY rate,0,Yes,G
2016,Sudden infant death syndrome,North,45 to 64,Female,DALY rate,0,Yes,G
2016,Sudden infant death syndrome,North,65 to 84,Female,DALY rate,0,Yes,G
2016,Sudden infant death syndrome,North,85 and over,Female,DALY rate,0,Yes,G
2016,Sudden infant death syndrome,North,Under 15,Both sexes,DALY rate,43.3,Yes,G
2016,Sudden infant death syndrome,North,15 to 24,Both sexes,DALY rate,0,Yes,G
2016,Sudden infant death syndrome,North,25 to 44,Both sexes,DALY rate,0,Yes,G
2016,Sudden infant death syndrome,North,45 to 64,Both sexes,DALY rate,0,Yes,G
2016,Sudden infant death syndrome,North,65 to 84,Both sexes,DALY rate,0,Yes,G
2016,Sudden infant death syndrome,North,85 and over,Both sexes,DALY rate,0,Yes,G
2016,Gynecological diseases,North,Under 15,Male,DALY rate,1,Yes,R
2016,Gynecological diseases,North,15 to 24,Male,DALY rate,1,Yes,R
2016,Gynecological diseases,North,25 to 44,Male,DALY rate,0.9,Yes,R
2016,Gynecological diseases,North,45 to 64,Male,DALY rate,0.8,Yes,R
2016,Gynecological diseases,North,65 to 84,Male,DALY rate,1.1,Yes,R
2016,Gynecological diseases,North,85 and over,Male,DALY rate,0.9,Yes,R
2016,Gynecological diseases,North,Under 15,Female,DALY rate,17.9,Yes,R
2016,Gynecological diseases,North,15 to 24,Female,DALY rate,430.1,Yes,R
2016,Gynecological diseases,North,25 to 44,Female,DALY rate,681.9,Yes,R
2016,Gynecological diseases,North,45 to 64,Female,DALY rate,462.9,Yes,R
2016,Gynecological diseases,North,65 to 84,Female,DALY rate,93.9,Yes,R
2016,Gynecological diseases,North,85 and over,Female,DALY rate,134.6,Yes,R
2016,Gynecological diseases,North,Under 15,Both sexes,DALY rate,9.2,Yes,R
2016,Gynecological diseases,North,15 to 24,Both sexes,DALY rate,209.4,Yes,R
2016,Gynecological diseases,North,25 to 44,Both sexes,DALY rate,340.8,Yes,R
2016,Gynecological diseases,North,45 to 64,Both sexes,DALY rate,236.1,Yes,R
2016,Gynecological diseases,North,65 to 84,Both sexes,DALY rate,50.8,Yes,R
2016,Gynecological diseases,North,85 and over,Both sexes,DALY rate,88.6,Yes,R
2016,"Endocrine, metabolic, blood, and immune disorders",North,Under 15,Male,DALY rate,110.6,Yes,R
2016,"Endocrine, metabolic, blood, and immune disorders",North,15 to 24,Male,DALY rate,266.8,Yes,R
2016,"Endocrine, metabolic, blood, and immune disorders",North,25 to 44,Male,DALY rate,238.6,No,R
2016,"Endocrine, metabolic, blood, and immune disorders",North,45 to 64,Male,DALY rate,339.4,No,R
2016,"Endocrine, metabolic, blood, and immune disorders",North,65 to 84,Male,DALY rate,581.9,No,R
2016,"Endocrine, metabolic, blood, and immune disorders",North,85 and over,Male,DALY rate,808.8,No,R
2016,"Endocrine, metabolic, blood, and immune disorders",North,Under 15,Female,DALY rate,111.5,Yes,R
2016,"Endocrine, metabolic, blood, and immune disorders",North,15 to 24,Female,DALY rate,104.4,Yes,R
2016,"Endocrine, metabolic, blood, and immune disorders",North,25 to 44,Female,DALY rate,82.1,Yes,R
2016,"Endocrine, metabolic, blood, and immune disorders",North,45 to 64,Female,DALY rate,313.5,No,R
2016,"Endocrine, metabolic, blood, and immune disorders",North,65 to 84,Female,DALY rate,705.4,No,R
2016,"Endocrine, metabolic, blood, and immune disorders",North,85 and over,Female,DALY rate,"1,528.80",No,R
2016,"Endocrine, metabolic, blood, and immune disorders",North,Under 15,Both sexes,DALY rate,111,Yes,R
2016,"Endocrine, metabolic, blood, and immune disorders",North,15 to 24,Both sexes,DALY rate,187.9,Yes,R
2016,"Endocrine, metabolic, blood, and immune disorders",North,25 to 44,Both sexes,DALY rate,160.1,No,R
2016,"Endocrine, metabolic, blood, and immune disorders",North,45 to 64,Both sexes,DALY rate,326.2,No,R
2016,"Endocrine, metabolic, blood, and immune disorders",North,65 to 84,Both sexes,DALY rate,652.8,No,R
2016,"Endocrine, metabolic, blood, and immune disorders",North,85 and over,Both sexes,DALY rate,"1,275.70",No,R
2016,Transport injuries,North,Under 15,Male,DALY rate,160.4,Yes,G
2016,Transport injuries,North,15 to 24,Male,DALY rate,892.1,No,G
2016,Transport injuries,North,25 to 44,Male,DALY rate,457.8,No,G
2016,Transport injuries,North,45 to 64,Male,DALY rate,310.8,No,G
2016,Transport injuries,North,65 to 84,Male,DALY rate,134.1,No,G
2016,Transport injuries,North,85 and over,Male,DALY rate,186.1,Yes,G
2016,Transport injuries,North,Under 15,Female,DALY rate,327,Yes,G
2016,Transport injuries,North,15 to 24,Female,DALY rate,370.9,Yes,G
2016,Transport injuries,North,25 to 44,Female,DALY rate,102.5,Yes,G
2016,Transport injuries,North,45 to 64,Female,DALY rate,175.7,No,G
2016,Transport injuries,North,65 to 84,Female,DALY rate,46,Yes,G
2016,Transport injuries,North,85 and over,Female,DALY rate,80.4,Yes,G
2016,Transport injuries,North,Under 15,Both sexes,DALY rate,241.7,No,G
2016,Transport injuries,North,15 to 24,Both sexes,DALY rate,639.6,No,G
2016,Transport injuries,North,25 to 44,Both sexes,DALY rate,281.4,No,G
2016,Transport injuries,North,45 to 64,Both sexes,DALY rate,242.2,No,G
2016,Transport injuries,North,65 to 84,Both sexes,DALY rate,86,No,G
2016,Transport injuries,North,85 and over,Both sexes,DALY rate,119.6,Yes,G
2016,Falls,North,Under 15,Male,DALY rate,150.9,Yes,G
2016,Falls,North,15 to 24,Male,DALY rate,282.1,Yes,G
2016,Falls,North,25 to 44,Male,DALY rate,234.7,Yes,G
2016,Falls,North,45 to 64,Male,DALY rate,218.5,No,G
2016,Falls,North,65 to 84,Male,DALY rate,"1,011.60",No,G
2016,Falls,North,85 and over,Male,DALY rate,"4,430.10",No,G
2016,Falls,North,Under 15,Female,DALY rate,59.7,Yes,G
2016,Falls,North,15 to 24,Female,DALY rate,73.4,Yes,G
2016,Falls,North,25 to 44,Female,DALY rate,44.6,Yes,G
2016,Falls,North,45 to 64,Female,DALY rate,140.3,Yes,G
2016,Falls,North,65 to 84,Female,DALY rate,727.4,No,G
2016,Falls,North,85 and over,Female,DALY rate,"4,672.60",No,G
2016,Falls,North,Under 15,Both sexes,DALY rate,106.3,Yes,G
2016,Falls,North,15 to 24,Both sexes,DALY rate,180.6,Yes,G
2016,Falls,North,25 to 44,Both sexes,DALY rate,139.1,Yes,G
2016,Falls,North,45 to 64,Both sexes,DALY rate,178.7,No,G
2016,Falls,North,65 to 84,Both sexes,DALY rate,859.2,No,G
2016,Falls,North,85 and over,Both sexes,DALY rate,"4,594.40",No,G
2016,Other unintentional injuries,North,Under 15,Male,DALY rate,118.2,Yes,A
2016,Other unintentional injuries,North,15 to 24,Male,DALY rate,259.7,Yes,A
2016,Other unintentional injuries,North,25 to 44,Male,DALY rate,530.1,No,A
2016,Other unintentional injuries,North,45 to 64,Male,DALY rate,382,No,A
2016,Other unintentional injuries,North,65 to 84,Male,DALY rate,470.3,No,A
2016,Other unintentional injuries,North,85 and over,Male,DALY rate,798.8,No,A
2016,Other unintentional injuries,North,Under 15,Female,DALY rate,272.9,Yes,A
2016,Other unintentional injuries,North,15 to 24,Female,DALY rate,143.9,Yes,A
2016,Other unintentional injuries,North,25 to 44,Female,DALY rate,86.8,Yes,A
2016,Other unintentional injuries,North,45 to 64,Female,DALY rate,112.3,Yes,A
2016,Other unintentional injuries,North,65 to 84,Female,DALY rate,238.8,No,A
2016,Other unintentional injuries,North,85 and over,Female,DALY rate,682,No,A
2016,Other unintentional injuries,North,Under 15,Both sexes,DALY rate,193.6,Yes,A
2016,Other unintentional injuries,North,15 to 24,Both sexes,DALY rate,203.1,Yes,A
2016,Other unintentional injuries,North,25 to 44,Both sexes,DALY rate,308.4,No,A
2016,Other unintentional injuries,North,45 to 64,Both sexes,DALY rate,244.9,No,A
2016,Other unintentional injuries,North,65 to 84,Both sexes,DALY rate,350.4,No,A
2016,Other unintentional injuries,North,85 and over,Both sexes,DALY rate,734,No,A
2016,Self-harm and interpersonal violence,North,Under 15,Male,DALY rate,1.9,Yes,G
2016,Self-harm and interpersonal violence,North,15 to 24,Male,DALY rate,780.7,No,G
2016,Self-harm and interpersonal violence,North,25 to 44,Male,DALY rate,"2,039.60",No,G
2016,Self-harm and interpersonal violence,North,45 to 64,Male,DALY rate,"1,113.00",No,G
2016,Self-harm and interpersonal violence,North,65 to 84,Male,DALY rate,440.3,No,G
2016,Self-harm and interpersonal violence,North,85 and over,Male,DALY rate,92.8,Yes,G
2016,Self-harm and interpersonal violence,North,Under 15,Female,DALY rate,9.3,Yes,G
2016,Self-harm and interpersonal violence,North,15 to 24,Female,DALY rate,451.3,No,G
2016,Self-harm and interpersonal violence,North,25 to 44,Female,DALY rate,833.3,No,G
2016,Self-harm and interpersonal violence,North,45 to 64,Female,DALY rate,507,No,G
2016,Self-harm and interpersonal violence,North,65 to 84,Female,DALY rate,167.2,No,G
2016,Self-harm and interpersonal violence,North,85 and over,Female,DALY rate,156,Yes,G
2016,Self-harm and interpersonal violence,North,Under 15,Both sexes,DALY rate,5.5,Yes,G
2016,Self-harm and interpersonal violence,North,15 to 24,Both sexes,DALY rate,621,No,G
2016,Self-harm and interpersonal violence,North,25 to 44,Both sexes,DALY rate,"1,440.00",No,G
2016,Self-harm and interpersonal violence,North,45 to 64,Both sexes,DALY rate,804.7,No,G
2016,Self-harm and interpersonal violence,North,65 to 84,Both sexes,DALY rate,296.2,No,G
2016,Self-harm and interpersonal violence,North,85 and over,Both sexes,DALY rate,125.8,Yes,G
2016,Unknown cause of injury,North,Under 15,Male,DALY rate,35.8,Yes,A
2016,Unknown cause of injury,North,15 to 24,Male,DALY rate,46.8,Yes,A
2016,Unknown cause of injury,North,25 to 44,Male,DALY rate,71.3,Yes,A
2016,Unknown cause of injury,North,45 to 64,Male,DALY rate,66.9,Yes,A
2016,Unknown cause of injury,North,65 to 84,Male,DALY rate,61.6,Yes,A
2016,Unknown cause of injury,North,85 and over,Male,DALY rate,86.4,Yes,A
2016,Unknown cause of injury,North,Under 15,Female,DALY rate,27.2,Yes,A
2016,Unknown cause of injury,North,15 to 24,Female,DALY rate,25.5,Yes,A
2016,Unknown cause of injury,North,25 to 44,Female,DALY rate,29.3,Yes,A
2016,Unknown cause of injury,North,45 to 64,Female,DALY rate,36.1,Yes,A
2016,Unknown cause of injury,North,65 to 84,Female,DALY rate,51.6,Yes,A
2016,Unknown cause of injury,North,85 and over,Female,DALY rate,110.1,Yes,A
2016,Unknown cause of injury,North,Under 15,Both sexes,DALY rate,31.6,Yes,A
2016,Unknown cause of injury,North,15 to 24,Both sexes,DALY rate,36.5,Yes,A
2016,Unknown cause of injury,North,25 to 44,Both sexes,DALY rate,50.3,Yes,A
2016,Unknown cause of injury,North,45 to 64,Both sexes,DALY rate,51.2,Yes,A
2016,Unknown cause of injury,North,65 to 84,Both sexes,DALY rate,56.5,Yes,A
2016,Unknown cause of injury,North,85 and over,Both sexes,DALY rate,102.1,Yes,A
2016,Blindness and vision loss,North,Under 15,Male,DALY rate,174.3,Yes,A
2016,Blindness and vision loss,North,15 to 24,Male,DALY rate,152.3,Yes,A
2016,Blindness and vision loss,North,25 to 44,Male,DALY rate,88.9,Yes,A
2016,Blindness and vision loss,North,45 to 64,Male,DALY rate,147.9,Yes,A
2016,Blindness and vision loss,North,65 to 84,Male,DALY rate,509.8,Yes,A
2016,Blindness and vision loss,North,85 and over,Male,DALY rate,"1,033.40",Yes,A
2016,Blindness and vision loss,North,Under 15,Female,DALY rate,183.1,Yes,A
2016,Blindness and vision loss,North,15 to 24,Female,DALY rate,171.6,Yes,A
2016,Blindness and vision loss,North,25 to 44,Female,DALY rate,136.2,Yes,A
2016,Blindness and vision loss,North,45 to 64,Female,DALY rate,171.4,Yes,A
2016,Blindness and vision loss,North,65 to 84,Female,DALY rate,577.2,Yes,A
2016,Blindness and vision loss,North,85 and over,Female,DALY rate,"1,091.20",Yes,A
2016,Blindness and vision loss,North,Under 15,Both sexes,DALY rate,178.6,Yes,A
2016,Blindness and vision loss,North,15 to 24,Both sexes,DALY rate,161.7,Yes,A
2016,Blindness and vision loss,North,25 to 44,Both sexes,DALY rate,112.5,Yes,A
2016,Blindness and vision loss,North,45 to 64,Both sexes,DALY rate,159.9,Yes,A
2016,Blindness and vision loss,North,65 to 84,Both sexes,DALY rate,546.7,Yes,A
2016,Blindness and vision loss,North,85 and over,Both sexes,DALY rate,"1,072.10",Yes,A
2016,Age-related and other hearing loss,North,Under 15,Male,DALY rate,220.5,Yes,A
2016,Age-related and other hearing loss,North,15 to 24,Male,DALY rate,144.9,Yes,A
2016,Age-related and other hearing loss,North,25 to 44,Male,DALY rate,209,Yes,A
2016,Age-related and other hearing loss,North,45 to 64,Male,DALY rate,374.1,Yes,A
2016,Age-related and other hearing loss,North,65 to 84,Male,DALY rate,686.7,Yes,A
2016,Age-related and other hearing loss,North,85 and over,Male,DALY rate,648.9,Yes,A
2016,Age-related and other hearing loss,North,Under 15,Female,DALY rate,184.9,Yes,A
2016,Age-related and other hearing loss,North,15 to 24,Female,DALY rate,172.8,Yes,A
2016,Age-related and other hearing loss,North,25 to 44,Female,DALY rate,217.4,Yes,A
2016,Age-related and other hearing loss,North,45 to 64,Female,DALY rate,335.3,Yes,A
2016,Age-related and other hearing loss,North,65 to 84,Female,DALY rate,631.4,Yes,A
2016,Age-related and other hearing loss,North,85 and over,Female,DALY rate,793.4,Yes,A
2016,Age-related and other hearing loss,North,Under 15,Both sexes,DALY rate,203.1,Yes,A
2016,Age-related and other hearing loss,North,15 to 24,Both sexes,DALY rate,158.4,Yes,A
2016,Age-related and other hearing loss,North,25 to 44,Both sexes,DALY rate,213.4,Yes,A
2016,Age-related and other hearing loss,North,45 to 64,Both sexes,DALY rate,354.5,Yes,A
2016,Age-related and other hearing loss,North,65 to 84,Both sexes,DALY rate,658.7,Yes,A
2016,Age-related and other hearing loss,North,85 and over,Both sexes,DALY rate,742.4,Yes,A
2016,Other sensory conditions,North,Under 15,Male,DALY rate,73.6,Yes,A
2016,Other sensory conditions,North,15 to 24,Male,DALY rate,109.4,Yes,A
2016,Other sensory conditions,North,25 to 44,Male,DALY rate,205.8,Yes,A
2016,Other sensory conditions,North,45 to 64,Male,DALY rate,278.1,Yes,A
2016,Other sensory conditions,North,65 to 84,Male,DALY rate,274.9,Yes,A
2016,Other sensory conditions,North,85 and over,Male,DALY rate,173.4,Yes,A
2016,Other sensory conditions,North,Under 15,Female,DALY rate,105.1,Yes,A
2016,Other sensory conditions,North,15 to 24,Female,DALY rate,219.7,Yes,A
2016,Other sensory conditions,North,25 to 44,Female,DALY rate,351,Yes,A
2016,Other sensory conditions,North,45 to 64,Female,DALY rate,421.9,Yes,A
2016,Other sensory conditions,North,65 to 84,Female,DALY rate,353.3,Yes,A
2016,Other sensory conditions,North,85 and over,Female,DALY rate,184.6,Yes,A
2016,Other sensory conditions,North,Under 15,Both sexes,DALY rate,89,Yes,A
2016,Other sensory conditions,North,15 to 24,Both sexes,DALY rate,162.9,Yes,A
2016,Other sensory conditions,North,25 to 44,Both sexes,DALY rate,278.5,Yes,A
2016,Other sensory conditions,North,45 to 64,Both sexes,DALY rate,351.2,Yes,A
2016,Other sensory conditions,North,65 to 84,Both sexes,DALY rate,316.4,Yes,A
2016,Other sensory conditions,North,85 and over,Both sexes,DALY rate,180.7,Yes,A
2016,Skin and subcutaneous diseases,North,Under 15,Male,DALY rate,397.7,Yes,A
2016,Skin and subcutaneous diseases,North,15 to 24,Male,DALY rate,345,Yes,A
2016,Skin and subcutaneous diseases,North,25 to 44,Male,DALY rate,210.4,Yes,A
2016,Skin and subcutaneous diseases,North,45 to 64,Male,DALY rate,264.1,Yes,A
2016,Skin and subcutaneous diseases,North,65 to 84,Male,DALY rate,399.1,No,A
2016,Skin and subcutaneous diseases,North,85 and over,Male,DALY rate,522.2,Yes,A
2016,Skin and subcutaneous diseases,North,Under 15,Female,DALY rate,429.5,Yes,A
2016,Skin and subcutaneous diseases,North,15 to 24,Female,DALY rate,529.2,Yes,A
2016,Skin and subcutaneous diseases,North,25 to 44,Female,DALY rate,340.9,Yes,A
2016,Skin and subcutaneous diseases,North,45 to 64,Female,DALY rate,255.3,Yes,A
2016,Skin and subcutaneous diseases,North,65 to 84,Female,DALY rate,383.7,No,A
2016,Skin and subcutaneous diseases,North,85 and over,Female,DALY rate,784.9,No,A
2016,Skin and subcutaneous diseases,North,Under 15,Both sexes,DALY rate,413.3,Yes,A
2016,Skin and subcutaneous diseases,North,15 to 24,Both sexes,DALY rate,434.3,Yes,A
2016,Skin and subcutaneous diseases,North,25 to 44,Both sexes,DALY rate,275.4,Yes,A
2016,Skin and subcutaneous diseases,North,45 to 64,Both sexes,DALY rate,259.6,Yes,A
2016,Skin and subcutaneous diseases,North,65 to 84,Both sexes,DALY rate,392,No,A
2016,Skin and subcutaneous diseases,North,85 and over,Both sexes,DALY rate,689.6,No,A
2016,All causes of disease and injury,NHS Grampian,Under 15,Male,DALY rate,"5,543.90",No,na
2016,All causes of disease and injury,NHS Grampian,15 to 24,Male,DALY rate,"9,983.00",No,na
2016,All causes of disease and injury,NHS Grampian,25 to 44,Male,DALY rate,"15,442.50",No,na
2016,All causes of disease and injury,NHS Grampian,45 to 64,Male,DALY rate,"31,417.20",No,na
2016,All causes of disease and injury,NHS Grampian,65 to 84,Male,DALY rate,"78,875.40",No,na
2016,All causes of disease and injury,NHS Grampian,85 and over,Male,DALY rate,"173,726.70",No,na
2016,All causes of disease and injury,NHS Grampian,Under 15,Female,DALY rate,"4,682.20",No,na
2016,All causes of disease and injury,NHS Grampian,15 to 24,Female,DALY rate,"8,098.60",Yes,na
2016,All causes of disease and injury,NHS Grampian,25 to 44,Female,DALY rate,"15,666.50",No,na
2016,All causes of disease and injury,NHS Grampian,45 to 64,Female,DALY rate,"26,378.90",No,na
2016,All causes of disease and injury,NHS Grampian,65 to 84,Female,DALY rate,"59,507.20",No,na
2016,All causes of disease and injury,NHS Grampian,85 and over,Female,DALY rate,"156,599.80",No,na
2016,All causes of disease and injury,NHS Grampian,Under 15,Both sexes,DALY rate,"5,123.40",No,na
2016,All causes of disease and injury,NHS Grampian,15 to 24,Both sexes,DALY rate,"9,055.70",No,na
2016,All causes of disease and injury,NHS Grampian,25 to 44,Both sexes,DALY rate,"15,561.90",No,na
2016,All causes of disease and injury,NHS Grampian,45 to 64,Both sexes,DALY rate,"28,884.60",No,na
2016,All causes of disease and injury,NHS Grampian,65 to 84,Both sexes,DALY rate,"68,517.40",No,na
2016,All causes of disease and injury,NHS Grampian,85 and over,Both sexes,DALY rate,"162,407.40",No,na
2016,HIV/AIDS and tuberculosis,NHS Grampian,Under 15,Male,DALY rate,0.8,Yes,G
2016,HIV/AIDS and tuberculosis,NHS Grampian,15 to 24,Male,DALY rate,3.4,Yes,G
2016,HIV/AIDS and tuberculosis,NHS Grampian,25 to 44,Male,DALY rate,25.7,Yes,G
2016,HIV/AIDS and tuberculosis,NHS Grampian,45 to 64,Male,DALY rate,68.8,Yes,G
2016,HIV/AIDS and tuberculosis,NHS Grampian,65 to 84,Male,DALY rate,5.4,Yes,G
2016,HIV/AIDS and tuberculosis,NHS Grampian,85 and over,Male,DALY rate,19.1,Yes,G
2016,HIV/AIDS and tuberculosis,NHS Grampian,Under 15,Female,DALY rate,1.1,Yes,G
2016,HIV/AIDS and tuberculosis,NHS Grampian,15 to 24,Female,DALY rate,2.6,Yes,G
2016,HIV/AIDS and tuberculosis,NHS Grampian,25 to 44,Female,DALY rate,11.5,Yes,G
2016,HIV/AIDS and tuberculosis,NHS Grampian,45 to 64,Female,DALY rate,53.1,Yes,G
2016,HIV/AIDS and tuberculosis,NHS Grampian,65 to 84,Female,DALY rate,2.1,Yes,G
2016,HIV/AIDS and tuberculosis,NHS Grampian,85 and over,Female,DALY rate,3,Yes,G
2016,HIV/AIDS and tuberculosis,NHS Grampian,Under 15,Both sexes,DALY rate,0.9,Yes,G
2016,HIV/AIDS and tuberculosis,NHS Grampian,15 to 24,Both sexes,DALY rate,3,Yes,G
2016,HIV/AIDS and tuberculosis,NHS Grampian,25 to 44,Both sexes,DALY rate,18.8,Yes,G
2016,HIV/AIDS and tuberculosis,NHS Grampian,45 to 64,Both sexes,DALY rate,60.9,Yes,G
2016,HIV/AIDS and tuberculosis,NHS Grampian,65 to 84,Both sexes,DALY rate,3.6,Yes,G
2016,HIV/AIDS and tuberculosis,NHS Grampian,85 and over,Both sexes,DALY rate,8.4,Yes,G
2016,Lower respiratory infections,NHS Grampian,Under 15,Male,DALY rate,28.9,Yes,G
2016,Lower respiratory infections,NHS Grampian,15 to 24,Male,DALY rate,11.6,Yes,G
2016,Lower respiratory infections,NHS Grampian,25 to 44,Male,DALY rate,81.3,Yes,G
2016,Lower respiratory infections,NHS Grampian,45 to 64,Male,DALY rate,354.4,No,G
2016,Lower respiratory infections,NHS Grampian,65 to 84,Male,DALY rate,"1,882.20",No,G
2016,Lower respiratory infections,NHS Grampian,85 and over,Male,DALY rate,"9,197.70",No,G
2016,Lower respiratory infections,NHS Grampian,Under 15,Female,DALY rate,30.3,Yes,G
2016,Lower respiratory infections,NHS Grampian,15 to 24,Female,DALY rate,15.9,Yes,G
2016,Lower respiratory infections,NHS Grampian,25 to 44,Female,DALY rate,23.4,Yes,G
2016,Lower respiratory infections,NHS Grampian,45 to 64,Female,DALY rate,390.5,No,G
2016,Lower respiratory infections,NHS Grampian,65 to 84,Female,DALY rate,"1,297.00",No,G
2016,Lower respiratory infections,NHS Grampian,85 and over,Female,DALY rate,"11,015.80",No,G
2016,Lower respiratory infections,NHS Grampian,Under 15,Both sexes,DALY rate,29.6,Yes,G
2016,Lower respiratory infections,NHS Grampian,15 to 24,Both sexes,DALY rate,13.7,Yes,G
2016,Lower respiratory infections,NHS Grampian,25 to 44,Both sexes,DALY rate,52.6,Yes,G
2016,Lower respiratory infections,NHS Grampian,45 to 64,Both sexes,DALY rate,371.6,No,G
2016,Lower respiratory infections,NHS Grampian,65 to 84,Both sexes,DALY rate,"1,569.60",No,G
2016,Lower respiratory infections,NHS Grampian,85 and over,Both sexes,DALY rate,"10,412.60",No,G
2016,Diarrhoea and other common infections,NHS Grampian,Under 15,Male,DALY rate,119.8,Yes,A
2016,Diarrhoea and other common infections,NHS Grampian,15 to 24,Male,DALY rate,69.8,Yes,A
2016,Diarrhoea and other common infections,NHS Grampian,25 to 44,Male,DALY rate,59.8,Yes,A
2016,Diarrhoea and other common infections,NHS Grampian,45 to 64,Male,DALY rate,90,Yes,A
2016,Diarrhoea and other common infections,NHS Grampian,65 to 84,Male,DALY rate,229.2,Yes,A
2016,Diarrhoea and other common infections,NHS Grampian,85 and over,Male,DALY rate,501.5,Yes,A
2016,Diarrhoea and other common infections,NHS Grampian,Under 15,Female,DALY rate,115.1,Yes,A
2016,Diarrhoea and other common infections,NHS Grampian,15 to 24,Female,DALY rate,81.5,Yes,A
2016,Diarrhoea and other common infections,NHS Grampian,25 to 44,Female,DALY rate,154.9,Yes,A
2016,Diarrhoea and other common infections,NHS Grampian,45 to 64,Female,DALY rate,106.4,Yes,A
2016,Diarrhoea and other common infections,NHS Grampian,65 to 84,Female,DALY rate,319.1,No,A
2016,Diarrhoea and other common infections,NHS Grampian,85 and over,Female,DALY rate,817.4,No,A
2016,Diarrhoea and other common infections,NHS Grampian,Under 15,Both sexes,DALY rate,117.5,Yes,A
2016,Diarrhoea and other common infections,NHS Grampian,15 to 24,Both sexes,DALY rate,75.6,Yes,A
2016,Diarrhoea and other common infections,NHS Grampian,25 to 44,Both sexes,DALY rate,106.4,Yes,A
2016,Diarrhoea and other common infections,NHS Grampian,45 to 64,Both sexes,DALY rate,98.2,Yes,A
2016,Diarrhoea and other common infections,NHS Grampian,65 to 84,Both sexes,DALY rate,271.9,No,A
2016,Diarrhoea and other common infections,NHS Grampian,85 and over,Both sexes,DALY rate,685.1,No,A
2016,Neonatal disorders,NHS Grampian,Under 15,Male,DALY rate,524.9,Yes,G
2016,Neonatal disorders,NHS Grampian,15 to 24,Male,DALY rate,155.7,Yes,G
2016,Neonatal disorders,NHS Grampian,25 to 44,Male,DALY rate,0,Yes,G
2016,Neonatal disorders,NHS Grampian,45 to 64,Male,DALY rate,0,Yes,G
2016,Neonatal disorders,NHS Grampian,65 to 84,Male,DALY rate,0,Yes,G
2016,Neonatal disorders,NHS Grampian,85 and over,Male,DALY rate,0,Yes,G
2016,Neonatal disorders,NHS Grampian,Under 15,Female,DALY rate,727.5,Yes,G
2016,Neonatal disorders,NHS Grampian,15 to 24,Female,DALY rate,7.8,Yes,G
2016,Neonatal disorders,NHS Grampian,25 to 44,Female,DALY rate,0.1,Yes,G
2016,Neonatal disorders,NHS Grampian,45 to 64,Female,DALY rate,0,Yes,G
2016,Neonatal disorders,NHS Grampian,65 to 84,Female,DALY rate,0,Yes,G
2016,Neonatal disorders,NHS Grampian,85 and over,Female,DALY rate,0.1,Yes,G
2016,Neonatal disorders,NHS Grampian,Under 15,Both sexes,DALY rate,623.7,No,G
2016,Neonatal disorders,NHS Grampian,15 to 24,Both sexes,DALY rate,83.6,Yes,G
2016,Neonatal disorders,NHS Grampian,25 to 44,Both sexes,DALY rate,0,Yes,G
2016,Neonatal disorders,NHS Grampian,45 to 64,Both sexes,DALY rate,0,Yes,G
2016,Neonatal disorders,NHS Grampian,65 to 84,Both sexes,DALY rate,0,Yes,G
2016,Neonatal disorders,NHS Grampian,85 and over,Both sexes,DALY rate,0.1,Yes,G
2016,Maternal disorders,NHS Grampian,Under 15,Male,DALY rate,0,Yes,A
2016,Maternal disorders,NHS Grampian,15 to 24,Male,DALY rate,0,Yes,A
2016,Maternal disorders,NHS Grampian,25 to 44,Male,DALY rate,0,Yes,A
2016,Maternal disorders,NHS Grampian,45 to 64,Male,DALY rate,0,Yes,A
2016,Maternal disorders,NHS Grampian,65 to 84,Male,DALY rate,0,Yes,A
2016,Maternal disorders,NHS Grampian,85 and over,Male,DALY rate,0,Yes,A
2016,Maternal disorders,NHS Grampian,Under 15,Female,DALY rate,0,Yes,A
2016,Maternal disorders,NHS Grampian,15 to 24,Female,DALY rate,55.9,Yes,A
2016,Maternal disorders,NHS Grampian,25 to 44,Female,DALY rate,62.5,Yes,A
2016,Maternal disorders,NHS Grampian,45 to 64,Female,DALY rate,0.3,Yes,A
2016,Maternal disorders,NHS Grampian,65 to 84,Female,DALY rate,0,Yes,A
2016,Maternal disorders,NHS Grampian,85 and over,Female,DALY rate,0,Yes,A
2016,Maternal disorders,NHS Grampian,Under 15,Both sexes,DALY rate,0,Yes,A
2016,Maternal disorders,NHS Grampian,15 to 24,Both sexes,DALY rate,27.6,Yes,A
2016,Maternal disorders,NHS Grampian,25 to 44,Both sexes,DALY rate,30.7,Yes,A
2016,Maternal disorders,NHS Grampian,45 to 64,Both sexes,DALY rate,0.2,Yes,A
2016,Maternal disorders,NHS Grampian,65 to 84,Both sexes,DALY rate,0,Yes,A
2016,Maternal disorders,NHS Grampian,85 and over,Both sexes,DALY rate,0,Yes,A
2016,Nutritional deficiencies,NHS Grampian,Under 15,Male,DALY rate,19.9,Yes,R
2016,Nutritional deficiencies,NHS Grampian,15 to 24,Male,DALY rate,8.1,Yes,R
2016,Nutritional deficiencies,NHS Grampian,25 to 44,Male,DALY rate,6.7,Yes,R
2016,Nutritional deficiencies,NHS Grampian,45 to 64,Male,DALY rate,59.4,Yes,R
2016,Nutritional deficiencies,NHS Grampian,65 to 84,Male,DALY rate,184.3,Yes,R
2016,Nutritional deficiencies,NHS Grampian,85 and over,Male,DALY rate,308.7,Yes,R
2016,Nutritional deficiencies,NHS Grampian,Under 15,Female,DALY rate,20.1,Yes,R
2016,Nutritional deficiencies,NHS Grampian,15 to 24,Female,DALY rate,93,Yes,R
2016,Nutritional deficiencies,NHS Grampian,25 to 44,Female,DALY rate,93.4,Yes,R
2016,Nutritional deficiencies,NHS Grampian,45 to 64,Female,DALY rate,123,Yes,R
2016,Nutritional deficiencies,NHS Grampian,65 to 84,Female,DALY rate,173.2,Yes,R
2016,Nutritional deficiencies,NHS Grampian,85 and over,Female,DALY rate,885.5,No,R
2016,Nutritional deficiencies,NHS Grampian,Under 15,Both sexes,DALY rate,20,Yes,R
2016,Nutritional deficiencies,NHS Grampian,15 to 24,Both sexes,DALY rate,50,Yes,R
2016,Nutritional deficiencies,NHS Grampian,25 to 44,Both sexes,DALY rate,49.2,Yes,R
2016,Nutritional deficiencies,NHS Grampian,45 to 64,Both sexes,DALY rate,91.5,Yes,R
2016,Nutritional deficiencies,NHS Grampian,65 to 84,Both sexes,DALY rate,179,Yes,R
2016,Nutritional deficiencies,NHS Grampian,85 and over,Both sexes,DALY rate,703.1,No,R
2016,"Other communicable, maternal, neonatal and nutritional diseases",NHS Grampian,Under 15,Male,DALY rate,0,Yes,G
2016,"Other communicable, maternal, neonatal and nutritional diseases",NHS Grampian,15 to 24,Male,DALY rate,0.4,Yes,G
2016,"Other communicable, maternal, neonatal and nutritional diseases",NHS Grampian,25 to 44,Male,DALY rate,1.1,Yes,G
2016,"Other communicable, maternal, neonatal and nutritional diseases",NHS Grampian,45 to 64,Male,DALY rate,2.7,Yes,G
2016,"Other communicable, maternal, neonatal and nutritional diseases",NHS Grampian,65 to 84,Male,DALY rate,153.1,Yes,G
2016,"Other communicable, maternal, neonatal and nutritional diseases",NHS Grampian,85 and over,Male,DALY rate,6.2,Yes,G
2016,"Other communicable, maternal, neonatal and nutritional diseases",NHS Grampian,Under 15,Female,DALY rate,6.9,Yes,G
2016,"Other communicable, maternal, neonatal and nutritional diseases",NHS Grampian,15 to 24,Female,DALY rate,1.1,Yes,G
2016,"Other communicable, maternal, neonatal and nutritional diseases",NHS Grampian,25 to 44,Female,DALY rate,3.5,Yes,G
2016,"Other communicable, maternal, neonatal and nutritional diseases",NHS Grampian,45 to 64,Female,DALY rate,47.6,Yes,G
2016,"Other communicable, maternal, neonatal and nutritional diseases",NHS Grampian,65 to 84,Female,DALY rate,42.9,Yes,G
2016,"Other communicable, maternal, neonatal and nutritional diseases",NHS Grampian,85 and over,Female,DALY rate,2.1,Yes,G
2016,"Other communicable, maternal, neonatal and nutritional diseases",NHS Grampian,Under 15,Both sexes,DALY rate,3.4,Yes,G
2016,"Other communicable, maternal, neonatal and nutritional diseases",NHS Grampian,15 to 24,Both sexes,DALY rate,0.7,Yes,G
2016,"Other communicable, maternal, neonatal and nutritional diseases",NHS Grampian,25 to 44,Both sexes,DALY rate,2.3,Yes,G
2016,"Other communicable, maternal, neonatal and nutritional diseases",NHS Grampian,45 to 64,Both sexes,DALY rate,25.2,Yes,G
2016,"Other communicable, maternal, neonatal and nutritional diseases",NHS Grampian,65 to 84,Both sexes,DALY rate,94,Yes,G
2016,"Other communicable, maternal, neonatal and nutritional diseases",NHS Grampian,85 and over,Both sexes,DALY rate,3.5,Yes,G
2016,Oesophageal cancer,NHS Grampian,Under 15,Male,DALY rate,0,Yes,G
2016,Oesophageal cancer,NHS Grampian,15 to 24,Male,DALY rate,0,Yes,G
2016,Oesophageal cancer,NHS Grampian,25 to 44,Male,DALY rate,21.1,Yes,G
2016,Oesophageal cancer,NHS Grampian,45 to 64,Male,DALY rate,464.3,No,G
2016,Oesophageal cancer,NHS Grampian,65 to 84,Male,DALY rate,"1,734.80",No,G
2016,Oesophageal cancer,NHS Grampian,85 and over,Male,DALY rate,"2,684.90",No,G
2016,Oesophageal cancer,NHS Grampian,Under 15,Female,DALY rate,0,Yes,G
2016,Oesophageal cancer,NHS Grampian,15 to 24,Female,DALY rate,0,Yes,G
2016,Oesophageal cancer,NHS Grampian,25 to 44,Female,DALY rate,0,Yes,G
2016,Oesophageal cancer,NHS Grampian,45 to 64,Female,DALY rate,298,No,G
2016,Oesophageal cancer,NHS Grampian,65 to 84,Female,DALY rate,840.5,No,G
2016,Oesophageal cancer,NHS Grampian,85 and over,Female,DALY rate,677.9,No,G
2016,Oesophageal cancer,NHS Grampian,Under 15,Both sexes,DALY rate,0,Yes,G
2016,Oesophageal cancer,NHS Grampian,15 to 24,Both sexes,DALY rate,0,Yes,G
2016,Oesophageal cancer,NHS Grampian,25 to 44,Both sexes,DALY rate,10.6,Yes,G
2016,Oesophageal cancer,NHS Grampian,45 to 64,Both sexes,DALY rate,380.9,No,G
2016,Oesophageal cancer,NHS Grampian,65 to 84,Both sexes,DALY rate,"1,267.70",No,G
2016,Oesophageal cancer,NHS Grampian,85 and over,Both sexes,DALY rate,"1,336.40",No,G
2016,Stomach cancer,NHS Grampian,Under 15,Male,DALY rate,0,Yes,G
2016,Stomach cancer,NHS Grampian,15 to 24,Male,DALY rate,0,Yes,G
2016,Stomach cancer,NHS Grampian,25 to 44,Male,DALY rate,11,Yes,G
2016,Stomach cancer,NHS Grampian,45 to 64,Male,DALY rate,349.2,No,G
2016,Stomach cancer,NHS Grampian,65 to 84,Male,DALY rate,767.9,No,G
2016,Stomach cancer,NHS Grampian,85 and over,Male,DALY rate,713.8,Yes,G
2016,Stomach cancer,NHS Grampian,Under 15,Female,DALY rate,0,Yes,G
2016,Stomach cancer,NHS Grampian,15 to 24,Female,DALY rate,0,Yes,G
2016,Stomach cancer,NHS Grampian,25 to 44,Female,DALY rate,0.1,Yes,G
2016,Stomach cancer,NHS Grampian,45 to 64,Female,DALY rate,104.7,Yes,G
2016,Stomach cancer,NHS Grampian,65 to 84,Female,DALY rate,225.4,No,G
2016,Stomach cancer,NHS Grampian,85 and over,Female,DALY rate,175.8,Yes,G
2016,Stomach cancer,NHS Grampian,Under 15,Both sexes,DALY rate,0,Yes,G
2016,Stomach cancer,NHS Grampian,15 to 24,Both sexes,DALY rate,0,Yes,G
2016,Stomach cancer,NHS Grampian,25 to 44,Both sexes,DALY rate,5.6,Yes,G
2016,Stomach cancer,NHS Grampian,45 to 64,Both sexes,DALY rate,225.9,No,G
2016,Stomach cancer,NHS Grampian,65 to 84,Both sexes,DALY rate,473.1,No,G
2016,Stomach cancer,NHS Grampian,85 and over,Both sexes,DALY rate,365.6,Yes,G
2016,Colorectal cancer,NHS Grampian,Under 15,Male,DALY rate,6.2,Yes,G
2016,Colorectal cancer,NHS Grampian,15 to 24,Male,DALY rate,11,Yes,G
2016,Colorectal cancer,NHS Grampian,25 to 44,Male,DALY rate,131.3,Yes,G
2016,Colorectal cancer,NHS Grampian,45 to 64,Male,DALY rate,712.8,No,G
2016,Colorectal cancer,NHS Grampian,65 to 84,Male,DALY rate,"2,759.90",No,G
2016,Colorectal cancer,NHS Grampian,85 and over,Male,DALY rate,"4,518.60",No,G
2016,Colorectal cancer,NHS Grampian,Under 15,Female,DALY rate,5.3,Yes,G
2016,Colorectal cancer,NHS Grampian,15 to 24,Female,DALY rate,6.8,Yes,G
2016,Colorectal cancer,NHS Grampian,25 to 44,Female,DALY rate,231.2,Yes,G
2016,Colorectal cancer,NHS Grampian,45 to 64,Female,DALY rate,605.8,No,G
2016,Colorectal cancer,NHS Grampian,65 to 84,Female,DALY rate,"1,881.70",No,G
2016,Colorectal cancer,NHS Grampian,85 and over,Female,DALY rate,"3,777.00",No,G
2016,Colorectal cancer,NHS Grampian,Under 15,Both sexes,DALY rate,5.8,Yes,G
2016,Colorectal cancer,NHS Grampian,15 to 24,Both sexes,DALY rate,8.9,Yes,G
2016,Colorectal cancer,NHS Grampian,25 to 44,Both sexes,DALY rate,181.6,Yes,G
2016,Colorectal cancer,NHS Grampian,45 to 64,Both sexes,DALY rate,660.2,No,G
2016,Colorectal cancer,NHS Grampian,65 to 84,Both sexes,DALY rate,"2,274.70",No,G
2016,Colorectal cancer,NHS Grampian,85 and over,Both sexes,DALY rate,"4,009.60",No,G
2016,Liver cancer,NHS Grampian,Under 15,Male,DALY rate,0.1,Yes,G
2016,Liver cancer,NHS Grampian,15 to 24,Male,DALY rate,0,Yes,G
2016,Liver cancer,NHS Grampian,25 to 44,Male,DALY rate,8.3,Yes,G
2016,Liver cancer,NHS Grampian,45 to 64,Male,DALY rate,480.7,No,G
2016,Liver cancer,NHS Grampian,65 to 84,Male,DALY rate,676.6,No,G
2016,Liver cancer,NHS Grampian,85 and over,Male,DALY rate,"1,194.70",No,G
2016,Liver cancer,NHS Grampian,Under 15,Female,DALY rate,1,Yes,G
2016,Liver cancer,NHS Grampian,15 to 24,Female,DALY rate,0,Yes,G
2016,Liver cancer,NHS Grampian,25 to 44,Female,DALY rate,0.1,Yes,G
2016,Liver cancer,NHS Grampian,45 to 64,Female,DALY rate,92.5,Yes,G
2016,Liver cancer,NHS Grampian,65 to 84,Female,DALY rate,501.8,No,G
2016,Liver cancer,NHS Grampian,85 and over,Female,DALY rate,273.5,Yes,G
2016,Liver cancer,NHS Grampian,Under 15,Both sexes,DALY rate,0.5,Yes,G
2016,Liver cancer,NHS Grampian,15 to 24,Both sexes,DALY rate,0,Yes,G
2016,Liver cancer,NHS Grampian,25 to 44,Both sexes,DALY rate,4.2,Yes,G
2016,Liver cancer,NHS Grampian,45 to 64,Both sexes,DALY rate,285.7,No,G
2016,Liver cancer,NHS Grampian,65 to 84,Both sexes,DALY rate,590.7,No,G
2016,Liver cancer,NHS Grampian,85 and over,Both sexes,DALY rate,562.9,No,G
2016,Pancreatic cancer,NHS Grampian,Under 15,Male,DALY rate,0,Yes,G
2016,Pancreatic cancer,NHS Grampian,15 to 24,Male,DALY rate,0,Yes,G
2016,Pancreatic cancer,NHS Grampian,25 to 44,Male,DALY rate,12.2,Yes,G
2016,Pancreatic cancer,NHS Grampian,45 to 64,Male,DALY rate,296.7,No,G
2016,Pancreatic cancer,NHS Grampian,65 to 84,Male,DALY rate,"1,033.50",No,G
2016,Pancreatic cancer,NHS Grampian,85 and over,Male,DALY rate,"1,103.40",No,G
2016,Pancreatic cancer,NHS Grampian,Under 15,Female,DALY rate,0,Yes,G
2016,Pancreatic cancer,NHS Grampian,15 to 24,Female,DALY rate,0,Yes,G
2016,Pancreatic cancer,NHS Grampian,25 to 44,Female,DALY rate,0.1,Yes,G
2016,Pancreatic cancer,NHS Grampian,45 to 64,Female,DALY rate,236.2,No,G
2016,Pancreatic cancer,NHS Grampian,65 to 84,Female,DALY rate,875.4,No,G
2016,Pancreatic cancer,NHS Grampian,85 and over,Female,DALY rate,829.9,No,G
2016,Pancreatic cancer,NHS Grampian,Under 15,Both sexes,DALY rate,0,Yes,G
2016,Pancreatic cancer,NHS Grampian,15 to 24,Both sexes,DALY rate,0,Yes,G
2016,Pancreatic cancer,NHS Grampian,25 to 44,Both sexes,DALY rate,6.2,Yes,G
2016,Pancreatic cancer,NHS Grampian,45 to 64,Both sexes,DALY rate,266.4,No,G
2016,Pancreatic cancer,NHS Grampian,65 to 84,Both sexes,DALY rate,952.1,No,G
2016,Pancreatic cancer,NHS Grampian,85 and over,Both sexes,DALY rate,945.7,No,G
2016,Lung cancer,NHS Grampian,Under 15,Male,DALY rate,0,Yes,G
2016,Lung cancer,NHS Grampian,15 to 24,Male,DALY rate,0,Yes,G
2016,Lung cancer,NHS Grampian,25 to 44,Male,DALY rate,219.2,Yes,G
2016,Lung cancer,NHS Grampian,45 to 64,Male,DALY rate,"1,879.10",No,G
2016,Lung cancer,NHS Grampian,65 to 84,Male,DALY rate,"6,799.40",No,G
2016,Lung cancer,NHS Grampian,85 and over,Male,DALY rate,"5,181.60",No,G
2016,Lung cancer,NHS Grampian,Under 15,Female,DALY rate,0,Yes,G
2016,Lung cancer,NHS Grampian,15 to 24,Female,DALY rate,0,Yes,G
2016,Lung cancer,NHS Grampian,25 to 44,Female,DALY rate,0.4,Yes,G
2016,Lung cancer,NHS Grampian,45 to 64,Female,DALY rate,"1,462.40",No,G
2016,Lung cancer,NHS Grampian,65 to 84,Female,DALY rate,"4,005.80",No,G
2016,Lung cancer,NHS Grampian,85 and over,Female,DALY rate,"3,772.50",No,G
2016,Lung cancer,NHS Grampian,Under 15,Both sexes,DALY rate,0,Yes,G
2016,Lung cancer,NHS Grampian,15 to 24,Both sexes,DALY rate,0,Yes,G
2016,Lung cancer,NHS Grampian,25 to 44,Both sexes,DALY rate,111.3,Yes,G
2016,Lung cancer,NHS Grampian,45 to 64,Both sexes,DALY rate,"1,669.90",No,G
2016,Lung cancer,NHS Grampian,65 to 84,Both sexes,DALY rate,"5,324.10",No,G
2016,Lung cancer,NHS Grampian,85 and over,Both sexes,DALY rate,"4,210.40",No,G
2016,Breast cancer,NHS Grampian,Under 15,Male,DALY rate,0.1,Yes,G
2016,Breast cancer,NHS Grampian,15 to 24,Male,DALY rate,5,Yes,G
2016,Breast cancer,NHS Grampian,25 to 44,Male,DALY rate,14,Yes,G
2016,Breast cancer,NHS Grampian,45 to 64,Male,DALY rate,6.8,Yes,G
2016,Breast cancer,NHS Grampian,65 to 84,Male,DALY rate,9,Yes,G
2016,Breast cancer,NHS Grampian,85 and over,Male,DALY rate,10,Yes,G
2016,Breast cancer,NHS Grampian,Under 15,Female,DALY rate,0.2,Yes,G
2016,Breast cancer,NHS Grampian,15 to 24,Female,DALY rate,17.7,Yes,G
2016,Breast cancer,NHS Grampian,25 to 44,Female,DALY rate,801,No,G
2016,Breast cancer,NHS Grampian,45 to 64,Female,DALY rate,"1,833.30",No,G
2016,Breast cancer,NHS Grampian,65 to 84,Female,DALY rate,"1,907.00",No,G
2016,Breast cancer,NHS Grampian,85 and over,Female,DALY rate,"3,259.70",No,G
2016,Breast cancer,NHS Grampian,Under 15,Both sexes,DALY rate,0.1,Yes,G
2016,Breast cancer,NHS Grampian,15 to 24,Both sexes,DALY rate,11.3,Yes,G
2016,Breast cancer,NHS Grampian,25 to 44,Both sexes,DALY rate,402.1,No,G
2016,Breast cancer,NHS Grampian,45 to 64,Both sexes,DALY rate,925.5,No,G
2016,Breast cancer,NHS Grampian,65 to 84,Both sexes,DALY rate,"1,019.80",No,G
2016,Breast cancer,NHS Grampian,85 and over,Both sexes,DALY rate,"2,157.60",No,G
2016,Ovarian cancer,NHS Grampian,Under 15,Male,DALY rate,0,Yes,G
2016,Ovarian cancer,NHS Grampian,15 to 24,Male,DALY rate,0,Yes,G
2016,Ovarian cancer,NHS Grampian,25 to 44,Male,DALY rate,0,Yes,G
2016,Ovarian cancer,NHS Grampian,45 to 64,Male,DALY rate,0,Yes,G
2016,Ovarian cancer,NHS Grampian,65 to 84,Male,DALY rate,0,Yes,G
2016,Ovarian cancer,NHS Grampian,85 and over,Male,DALY rate,0,Yes,G
2016,Ovarian cancer,NHS Grampian,Under 15,Female,DALY rate,1,Yes,G
2016,Ovarian cancer,NHS Grampian,15 to 24,Female,DALY rate,0.5,Yes,G
2016,Ovarian cancer,NHS Grampian,25 to 44,Female,DALY rate,2.7,Yes,G
2016,Ovarian cancer,NHS Grampian,45 to 64,Female,DALY rate,517.8,No,G
2016,Ovarian cancer,NHS Grampian,65 to 84,Female,DALY rate,812.6,No,G
2016,Ovarian cancer,NHS Grampian,85 and over,Female,DALY rate,494.2,Yes,G
2016,Ovarian cancer,NHS Grampian,Under 15,Both sexes,DALY rate,0.5,Yes,G
2016,Ovarian cancer,NHS Grampian,15 to 24,Both sexes,DALY rate,0.2,Yes,G
2016,Ovarian cancer,NHS Grampian,25 to 44,Both sexes,DALY rate,1.3,Yes,G
2016,Ovarian cancer,NHS Grampian,45 to 64,Both sexes,DALY rate,260.7,No,G
2016,Ovarian cancer,NHS Grampian,65 to 84,Both sexes,DALY rate,442,No,G
2016,Ovarian cancer,NHS Grampian,85 and over,Both sexes,DALY rate,324.7,Yes,G
2016,Prostate cancer,NHS Grampian,Under 15,Male,DALY rate,0.1,Yes,G
2016,Prostate cancer,NHS Grampian,15 to 24,Male,DALY rate,0,Yes,G
2016,Prostate cancer,NHS Grampian,25 to 44,Male,DALY rate,0.4,Yes,G
2016,Prostate cancer,NHS Grampian,45 to 64,Male,DALY rate,255.5,No,G
2016,Prostate cancer,NHS Grampian,65 to 84,Male,DALY rate,"2,917.70",No,G
2016,Prostate cancer,NHS Grampian,85 and over,Male,DALY rate,"8,364.10",No,G
2016,Prostate cancer,NHS Grampian,Under 15,Female,DALY rate,0,Yes,G
2016,Prostate cancer,NHS Grampian,15 to 24,Female,DALY rate,0,Yes,G
2016,Prostate cancer,NHS Grampian,25 to 44,Female,DALY rate,0,Yes,G
2016,Prostate cancer,NHS Grampian,45 to 64,Female,DALY rate,0,Yes,G
2016,Prostate cancer,NHS Grampian,65 to 84,Female,DALY rate,0,Yes,G
2016,Prostate cancer,NHS Grampian,85 and over,Female,DALY rate,0,Yes,G
2016,Prostate cancer,NHS Grampian,Under 15,Both sexes,DALY rate,0,Yes,G
2016,Prostate cancer,NHS Grampian,15 to 24,Both sexes,DALY rate,0,Yes,G
2016,Prostate cancer,NHS Grampian,25 to 44,Both sexes,DALY rate,0.2,Yes,G
2016,Prostate cancer,NHS Grampian,45 to 64,Both sexes,DALY rate,127.4,No,G
2016,Prostate cancer,NHS Grampian,65 to 84,Both sexes,DALY rate,"1,331.60",No,G
2016,Prostate cancer,NHS Grampian,85 and over,Both sexes,DALY rate,"2,914.90",No,G
2016,Kidney cancer,NHS Grampian,Under 15,Male,DALY rate,0.4,Yes,G
2016,Kidney cancer,NHS Grampian,15 to 24,Male,DALY rate,0.1,Yes,G
2016,Kidney cancer,NHS Grampian,25 to 44,Male,DALY rate,71.3,Yes,G
2016,Kidney cancer,NHS Grampian,45 to 64,Male,DALY rate,481.1,No,G
2016,Kidney cancer,NHS Grampian,65 to 84,Male,DALY rate,841.3,No,G
2016,Kidney cancer,NHS Grampian,85 and over,Male,DALY rate,469.8,Yes,G
2016,Kidney cancer,NHS Grampian,Under 15,Female,DALY rate,2.2,Yes,G
2016,Kidney cancer,NHS Grampian,15 to 24,Female,DALY rate,0.1,Yes,G
2016,Kidney cancer,NHS Grampian,25 to 44,Female,DALY rate,0.6,Yes,G
2016,Kidney cancer,NHS Grampian,45 to 64,Female,DALY rate,51.2,Yes,G
2016,Kidney cancer,NHS Grampian,65 to 84,Female,DALY rate,463.8,No,G
2016,Kidney cancer,NHS Grampian,85 and over,Female,DALY rate,361,Yes,G
2016,Kidney cancer,NHS Grampian,Under 15,Both sexes,DALY rate,1.3,Yes,G
2016,Kidney cancer,NHS Grampian,15 to 24,Both sexes,DALY rate,0.1,Yes,G
2016,Kidney cancer,NHS Grampian,25 to 44,Both sexes,DALY rate,36.3,Yes,G
2016,Kidney cancer,NHS Grampian,45 to 64,Both sexes,DALY rate,265.5,No,G
2016,Kidney cancer,NHS Grampian,65 to 84,Both sexes,DALY rate,634,No,G
2016,Kidney cancer,NHS Grampian,85 and over,Both sexes,DALY rate,404.9,No,G
2016,Bladder cancer,NHS Grampian,Under 15,Male,DALY rate,1.1,Yes,G
2016,Bladder cancer,NHS Grampian,15 to 24,Male,DALY rate,1.5,Yes,G
2016,Bladder cancer,NHS Grampian,25 to 44,Male,DALY rate,1.9,Yes,G
2016,Bladder cancer,NHS Grampian,45 to 64,Male,DALY rate,240.8,No,G
2016,Bladder cancer,NHS Grampian,65 to 84,Male,DALY rate,"1,098.70",No,G
2016,Bladder cancer,NHS Grampian,85 and over,Male,DALY rate,"2,428.40",No,G
2016,Bladder cancer,NHS Grampian,Under 15,Female,DALY rate,0,Yes,G
2016,Bladder cancer,NHS Grampian,15 to 24,Female,DALY rate,0.4,Yes,G
2016,Bladder cancer,NHS Grampian,25 to 44,Female,DALY rate,2.6,Yes,G
2016,Bladder cancer,NHS Grampian,45 to 64,Female,DALY rate,136.9,Yes,G
2016,Bladder cancer,NHS Grampian,65 to 84,Female,DALY rate,451,No,G
2016,Bladder cancer,NHS Grampian,85 and over,Female,DALY rate,478.8,Yes,G
2016,Bladder cancer,NHS Grampian,Under 15,Both sexes,DALY rate,0.6,Yes,G
2016,Bladder cancer,NHS Grampian,15 to 24,Both sexes,DALY rate,0.9,Yes,G
2016,Bladder cancer,NHS Grampian,25 to 44,Both sexes,DALY rate,2.2,Yes,G
2016,Bladder cancer,NHS Grampian,45 to 64,Both sexes,DALY rate,188,No,G
2016,Bladder cancer,NHS Grampian,65 to 84,Both sexes,DALY rate,738.8,No,G
2016,Bladder cancer,NHS Grampian,85 and over,Both sexes,DALY rate,"1,131.40",No,G
2016,Non-Hodgkin's lymphoma,NHS Grampian,Under 15,Male,DALY rate,0.4,Yes,G
2016,Non-Hodgkin's lymphoma,NHS Grampian,15 to 24,Male,DALY rate,0.8,Yes,G
2016,Non-Hodgkin's lymphoma,NHS Grampian,25 to 44,Male,DALY rate,72.6,Yes,G
2016,Non-Hodgkin's lymphoma,NHS Grampian,45 to 64,Male,DALY rate,159.9,Yes,G
2016,Non-Hodgkin's lymphoma,NHS Grampian,65 to 84,Male,DALY rate,682.1,No,G
2016,Non-Hodgkin's lymphoma,NHS Grampian,85 and over,Male,DALY rate,"1,340.60",No,G
2016,Non-Hodgkin's lymphoma,NHS Grampian,Under 15,Female,DALY rate,0.1,Yes,G
2016,Non-Hodgkin's lymphoma,NHS Grampian,15 to 24,Female,DALY rate,0.4,Yes,G
2016,Non-Hodgkin's lymphoma,NHS Grampian,25 to 44,Female,DALY rate,1.4,Yes,G
2016,Non-Hodgkin's lymphoma,NHS Grampian,45 to 64,Female,DALY rate,158.6,Yes,G
2016,Non-Hodgkin's lymphoma,NHS Grampian,65 to 84,Female,DALY rate,658.4,No,G
2016,Non-Hodgkin's lymphoma,NHS Grampian,85 and over,Female,DALY rate,392.4,Yes,G
2016,Non-Hodgkin's lymphoma,NHS Grampian,Under 15,Both sexes,DALY rate,0.2,Yes,G
2016,Non-Hodgkin's lymphoma,NHS Grampian,15 to 24,Both sexes,DALY rate,0.6,Yes,G
2016,Non-Hodgkin's lymphoma,NHS Grampian,25 to 44,Both sexes,DALY rate,37.3,Yes,G
2016,Non-Hodgkin's lymphoma,NHS Grampian,45 to 64,Both sexes,DALY rate,159.3,No,G
2016,Non-Hodgkin's lymphoma,NHS Grampian,65 to 84,Both sexes,DALY rate,664.8,No,G
2016,Non-Hodgkin's lymphoma,NHS Grampian,85 and over,Both sexes,DALY rate,708.6,No,G
2016,Multiple myeloma,NHS Grampian,Under 15,Male,DALY rate,0,Yes,G
2016,Multiple myeloma,NHS Grampian,15 to 24,Male,DALY rate,0,Yes,G
2016,Multiple myeloma,NHS Grampian,25 to 44,Male,DALY rate,1.1,Yes,G
2016,Multiple myeloma,NHS Grampian,45 to 64,Male,DALY rate,68.9,Yes,G
2016,Multiple myeloma,NHS Grampian,65 to 84,Male,DALY rate,428.6,No,G
2016,Multiple myeloma,NHS Grampian,85 and over,Male,DALY rate,686.3,Yes,G
2016,Multiple myeloma,NHS Grampian,Under 15,Female,DALY rate,0,Yes,G
2016,Multiple myeloma,NHS Grampian,15 to 24,Female,DALY rate,0,Yes,G
2016,Multiple myeloma,NHS Grampian,25 to 44,Female,DALY rate,0.2,Yes,G
2016,Multiple myeloma,NHS Grampian,45 to 64,Female,DALY rate,44.6,Yes,G
2016,Multiple myeloma,NHS Grampian,65 to 84,Female,DALY rate,247.5,No,G
2016,Multiple myeloma,NHS Grampian,85 and over,Female,DALY rate,39.3,Yes,G
2016,Multiple myeloma,NHS Grampian,Under 15,Both sexes,DALY rate,0,Yes,G
2016,Multiple myeloma,NHS Grampian,15 to 24,Both sexes,DALY rate,0,Yes,G
2016,Multiple myeloma,NHS Grampian,25 to 44,Both sexes,DALY rate,0.6,Yes,G
2016,Multiple myeloma,NHS Grampian,45 to 64,Both sexes,DALY rate,56.4,Yes,G
2016,Multiple myeloma,NHS Grampian,65 to 84,Both sexes,DALY rate,333.9,No,G
2016,Multiple myeloma,NHS Grampian,85 and over,Both sexes,DALY rate,252.7,Yes,G
2016,Leukaemia,NHS Grampian,Under 15,Male,DALY rate,2.8,Yes,G
2016,Leukaemia,NHS Grampian,15 to 24,Male,DALY rate,222.4,Yes,G
2016,Leukaemia,NHS Grampian,25 to 44,Male,DALY rate,73.5,Yes,G
2016,Leukaemia,NHS Grampian,45 to 64,Male,DALY rate,54.2,Yes,G
2016,Leukaemia,NHS Grampian,65 to 84,Male,DALY rate,"1,031.70",No,G
2016,Leukaemia,NHS Grampian,85 and over,Male,DALY rate,"1,197.80",No,G
2016,Leukaemia,NHS Grampian,Under 15,Female,DALY rate,10,Yes,G
2016,Leukaemia,NHS Grampian,15 to 24,Female,DALY rate,1.1,Yes,G
2016,Leukaemia,NHS Grampian,25 to 44,Female,DALY rate,0.9,Yes,G
2016,Leukaemia,NHS Grampian,45 to 64,Female,DALY rate,45.5,Yes,G
2016,Leukaemia,NHS Grampian,65 to 84,Female,DALY rate,389.5,No,G
2016,Leukaemia,NHS Grampian,85 and over,Female,DALY rate,268.8,Yes,G
2016,Leukaemia,NHS Grampian,Under 15,Both sexes,DALY rate,6.3,Yes,G
2016,Leukaemia,NHS Grampian,15 to 24,Both sexes,DALY rate,114.4,Yes,G
2016,Leukaemia,NHS Grampian,25 to 44,Both sexes,DALY rate,37.3,Yes,G
2016,Leukaemia,NHS Grampian,45 to 64,Both sexes,DALY rate,49.9,Yes,G
2016,Leukaemia,NHS Grampian,65 to 84,Both sexes,DALY rate,692.5,No,G
2016,Leukaemia,NHS Grampian,85 and over,Both sexes,DALY rate,574.6,No,G
2016,Other cancers,NHS Grampian,Under 15,Male,DALY rate,526.7,Yes,G
2016,Other cancers,NHS Grampian,15 to 24,Male,DALY rate,225.2,Yes,G
2016,Other cancers,NHS Grampian,25 to 44,Male,DALY rate,532.3,No,G
2016,Other cancers,NHS Grampian,45 to 64,Male,DALY rate,"1,422.40",No,G
2016,Other cancers,NHS Grampian,65 to 84,Male,DALY rate,"3,244.50",No,G
2016,Other cancers,NHS Grampian,85 and over,Male,DALY rate,"3,167.40",No,G
2016,Other cancers,NHS Grampian,Under 15,Female,DALY rate,34.2,Yes,G
2016,Other cancers,NHS Grampian,15 to 24,Female,DALY rate,4.5,Yes,G
2016,Other cancers,NHS Grampian,25 to 44,Female,DALY rate,591.7,No,G
2016,Other cancers,NHS Grampian,45 to 64,Female,DALY rate,997.6,No,G
2016,Other cancers,NHS Grampian,65 to 84,Female,DALY rate,"2,514.70",No,G
2016,Other cancers,NHS Grampian,85 and over,Female,DALY rate,"3,008.00",No,G
2016,Other cancers,NHS Grampian,Under 15,Both sexes,DALY rate,286.4,Yes,G
2016,Other cancers,NHS Grampian,15 to 24,Both sexes,DALY rate,117.5,Yes,G
2016,Other cancers,NHS Grampian,25 to 44,Both sexes,DALY rate,563.4,No,G
2016,Other cancers,NHS Grampian,45 to 64,Both sexes,DALY rate,"1,209.60",No,G
2016,Other cancers,NHS Grampian,65 to 84,Both sexes,DALY rate,"2,837.50",No,G
2016,Other cancers,NHS Grampian,85 and over,Both sexes,DALY rate,"3,097.40",No,G
2016,Ischaemic heart disease,NHS Grampian,Under 15,Male,DALY rate,0.6,Yes,G
2016,Ischaemic heart disease,NHS Grampian,15 to 24,Male,DALY rate,0.8,Yes,G
2016,Ischaemic heart disease,NHS Grampian,25 to 44,Male,DALY rate,220.8,Yes,G
2016,Ischaemic heart disease,NHS Grampian,45 to 64,Male,DALY rate,"4,074.30",No,G
2016,Ischaemic heart disease,NHS Grampian,65 to 84,Male,DALY rate,"9,373.00",No,G
2016,Ischaemic heart disease,NHS Grampian,85 and over,Male,DALY rate,"23,182.40",No,G
2016,Ischaemic heart disease,NHS Grampian,Under 15,Female,DALY rate,0.5,Yes,G
2016,Ischaemic heart disease,NHS Grampian,15 to 24,Female,DALY rate,0.7,Yes,G
2016,Ischaemic heart disease,NHS Grampian,25 to 44,Female,DALY rate,8.1,Yes,G
2016,Ischaemic heart disease,NHS Grampian,45 to 64,Female,DALY rate,817.3,No,G
2016,Ischaemic heart disease,NHS Grampian,65 to 84,Female,DALY rate,"5,227.10",No,G
2016,Ischaemic heart disease,NHS Grampian,85 and over,Female,DALY rate,"16,706.20",No,G
2016,Ischaemic heart disease,NHS Grampian,Under 15,Both sexes,DALY rate,0.6,Yes,G
2016,Ischaemic heart disease,NHS Grampian,15 to 24,Both sexes,DALY rate,0.8,Yes,G
2016,Ischaemic heart disease,NHS Grampian,25 to 44,Both sexes,DALY rate,115.3,Yes,G
2016,Ischaemic heart disease,NHS Grampian,45 to 64,Both sexes,DALY rate,"2,435.40",No,G
2016,Ischaemic heart disease,NHS Grampian,65 to 84,Both sexes,DALY rate,"7,140.60",No,G
2016,Ischaemic heart disease,NHS Grampian,85 and over,Both sexes,DALY rate,"18,735.60",No,G
2016,Cerebrovascular disease,NHS Grampian,Under 15,Male,DALY rate,9.2,Yes,G
2016,Cerebrovascular disease,NHS Grampian,15 to 24,Male,DALY rate,13.4,Yes,G
2016,Cerebrovascular disease,NHS Grampian,25 to 44,Male,DALY rate,312.4,Yes,G
2016,Cerebrovascular disease,NHS Grampian,45 to 64,Male,DALY rate,"1,086.50",No,G
2016,Cerebrovascular disease,NHS Grampian,65 to 84,Male,DALY rate,"5,395.90",No,G
2016,Cerebrovascular disease,NHS Grampian,85 and over,Male,DALY rate,"20,369.60",No,G
2016,Cerebrovascular disease,NHS Grampian,Under 15,Female,DALY rate,7.5,Yes,G
2016,Cerebrovascular disease,NHS Grampian,15 to 24,Female,DALY rate,8.3,Yes,G
2016,Cerebrovascular disease,NHS Grampian,25 to 44,Female,DALY rate,184.3,Yes,G
2016,Cerebrovascular disease,NHS Grampian,45 to 64,Female,DALY rate,751.5,No,G
2016,Cerebrovascular disease,NHS Grampian,65 to 84,Female,DALY rate,"4,598.80",No,G
2016,Cerebrovascular disease,NHS Grampian,85 and over,Female,DALY rate,"19,055.40",No,G
2016,Cerebrovascular disease,NHS Grampian,Under 15,Both sexes,DALY rate,8.4,Yes,G
2016,Cerebrovascular disease,NHS Grampian,15 to 24,Both sexes,DALY rate,10.9,Yes,G
2016,Cerebrovascular disease,NHS Grampian,25 to 44,Both sexes,DALY rate,250.1,No,G
2016,Cerebrovascular disease,NHS Grampian,45 to 64,Both sexes,DALY rate,917.1,No,G
2016,Cerebrovascular disease,NHS Grampian,65 to 84,Both sexes,DALY rate,"4,984.00",No,G
2016,Cerebrovascular disease,NHS Grampian,85 and over,Both sexes,DALY rate,"19,603.50",No,G
2016,Atrial fibrillation and flutter,NHS Grampian,Under 15,Male,DALY rate,0.2,Yes,G
2016,Atrial fibrillation and flutter,NHS Grampian,15 to 24,Male,DALY rate,2.7,Yes,G
2016,Atrial fibrillation and flutter,NHS Grampian,25 to 44,Male,DALY rate,19.7,Yes,G
2016,Atrial fibrillation and flutter,NHS Grampian,45 to 64,Male,DALY rate,177.8,Yes,G
2016,Atrial fibrillation and flutter,NHS Grampian,65 to 84,Male,DALY rate,"1,695.40",No,G
2016,Atrial fibrillation and flutter,NHS Grampian,85 and over,Male,DALY rate,"4,243.70",No,G
2016,Atrial fibrillation and flutter,NHS Grampian,Under 15,Female,DALY rate,0.2,Yes,G
2016,Atrial fibrillation and flutter,NHS Grampian,15 to 24,Female,DALY rate,0.6,Yes,G
2016,Atrial fibrillation and flutter,NHS Grampian,25 to 44,Female,DALY rate,5.9,Yes,G
2016,Atrial fibrillation and flutter,NHS Grampian,45 to 64,Female,DALY rate,101.6,Yes,G
2016,Atrial fibrillation and flutter,NHS Grampian,65 to 84,Female,DALY rate,"1,178.60",No,G
2016,Atrial fibrillation and flutter,NHS Grampian,85 and over,Female,DALY rate,"5,457.50",No,G
2016,Atrial fibrillation and flutter,NHS Grampian,Under 15,Both sexes,DALY rate,0.2,Yes,G
2016,Atrial fibrillation and flutter,NHS Grampian,15 to 24,Both sexes,DALY rate,1.7,Yes,G
2016,Atrial fibrillation and flutter,NHS Grampian,25 to 44,Both sexes,DALY rate,12.9,Yes,G
2016,Atrial fibrillation and flutter,NHS Grampian,45 to 64,Both sexes,DALY rate,139.6,Yes,G
2016,Atrial fibrillation and flutter,NHS Grampian,65 to 84,Both sexes,DALY rate,"1,424.50",No,G
2016,Atrial fibrillation and flutter,NHS Grampian,85 and over,Both sexes,DALY rate,"5,017.00",No,G
2016,Peripheral vascular disease,NHS Grampian,Under 15,Male,DALY rate,0,Yes,G
2016,Peripheral vascular disease,NHS Grampian,15 to 24,Male,DALY rate,0,Yes,G
2016,Peripheral vascular disease,NHS Grampian,25 to 44,Male,DALY rate,2,Yes,G
2016,Peripheral vascular disease,NHS Grampian,45 to 64,Male,DALY rate,49.7,Yes,G
2016,Peripheral vascular disease,NHS Grampian,65 to 84,Male,DALY rate,275.5,No,G
2016,Peripheral vascular disease,NHS Grampian,85 and over,Male,DALY rate,"1,253.20",No,G
2016,Peripheral vascular disease,NHS Grampian,Under 15,Female,DALY rate,0,Yes,G
2016,Peripheral vascular disease,NHS Grampian,15 to 24,Female,DALY rate,0,Yes,G
2016,Peripheral vascular disease,NHS Grampian,25 to 44,Female,DALY rate,4.9,Yes,G
2016,Peripheral vascular disease,NHS Grampian,45 to 64,Female,DALY rate,7.9,Yes,G
2016,Peripheral vascular disease,NHS Grampian,65 to 84,Female,DALY rate,305.8,No,G
2016,Peripheral vascular disease,NHS Grampian,85 and over,Female,DALY rate,"1,938.50",No,G
2016,Peripheral vascular disease,NHS Grampian,Under 15,Both sexes,DALY rate,0,Yes,G
2016,Peripheral vascular disease,NHS Grampian,15 to 24,Both sexes,DALY rate,0,Yes,G
2016,Peripheral vascular disease,NHS Grampian,25 to 44,Both sexes,DALY rate,3.4,Yes,G
2016,Peripheral vascular disease,NHS Grampian,45 to 64,Both sexes,DALY rate,28.8,Yes,G
2016,Peripheral vascular disease,NHS Grampian,65 to 84,Both sexes,DALY rate,293.5,No,G
2016,Peripheral vascular disease,NHS Grampian,85 and over,Both sexes,DALY rate,"1,737.00",No,G
2016,Other cardiovascular and circulatory diseases,NHS Grampian,Under 15,Male,DALY rate,200.4,Yes,G
2016,Other cardiovascular and circulatory diseases,NHS Grampian,15 to 24,Male,DALY rate,44.1,Yes,G
2016,Other cardiovascular and circulatory diseases,NHS Grampian,25 to 44,Male,DALY rate,209.3,Yes,G
2016,Other cardiovascular and circulatory diseases,NHS Grampian,45 to 64,Male,DALY rate,"1,111.40",No,G
2016,Other cardiovascular and circulatory diseases,NHS Grampian,65 to 84,Male,DALY rate,"3,585.70",No,G
2016,Other cardiovascular and circulatory diseases,NHS Grampian,85 and over,Male,DALY rate,"8,879.90",No,G
2016,Other cardiovascular and circulatory diseases,NHS Grampian,Under 15,Female,DALY rate,32.5,Yes,G
2016,Other cardiovascular and circulatory diseases,NHS Grampian,15 to 24,Female,DALY rate,216.5,Yes,G
2016,Other cardiovascular and circulatory diseases,NHS Grampian,25 to 44,Female,DALY rate,152.4,Yes,G
2016,Other cardiovascular and circulatory diseases,NHS Grampian,45 to 64,Female,DALY rate,510.9,No,G
2016,Other cardiovascular and circulatory diseases,NHS Grampian,65 to 84,Female,DALY rate,"2,402.40",No,G
2016,Other cardiovascular and circulatory diseases,NHS Grampian,85 and over,Female,DALY rate,"8,907.50",No,G
2016,Other cardiovascular and circulatory diseases,NHS Grampian,Under 15,Both sexes,DALY rate,118.5,Yes,G
2016,Other cardiovascular and circulatory diseases,NHS Grampian,15 to 24,Both sexes,DALY rate,129.9,Yes,G
2016,Other cardiovascular and circulatory diseases,NHS Grampian,25 to 44,Both sexes,DALY rate,180.9,Yes,G
2016,Other cardiovascular and circulatory diseases,NHS Grampian,45 to 64,Both sexes,DALY rate,809.2,No,G
2016,Other cardiovascular and circulatory diseases,NHS Grampian,65 to 84,Both sexes,DALY rate,"2,964.40",No,G
2016,Other cardiovascular and circulatory diseases,NHS Grampian,85 and over,Both sexes,DALY rate,"8,879.00",No,G
2016,Asthma,NHS Grampian,Under 15,Male,DALY rate,605.1,Yes,A
2016,Asthma,NHS Grampian,15 to 24,Male,DALY rate,265.4,Yes,A
2016,Asthma,NHS Grampian,25 to 44,Male,DALY rate,309.1,Yes,A
2016,Asthma,NHS Grampian,45 to 64,Male,DALY rate,159.5,Yes,A
2016,Asthma,NHS Grampian,65 to 84,Male,DALY rate,129.3,Yes,A
2016,Asthma,NHS Grampian,85 and over,Male,DALY rate,678.1,Yes,A
2016,Asthma,NHS Grampian,Under 15,Female,DALY rate,303.3,Yes,A
2016,Asthma,NHS Grampian,15 to 24,Female,DALY rate,372,Yes,A
2016,Asthma,NHS Grampian,25 to 44,Female,DALY rate,417.1,Yes,A
2016,Asthma,NHS Grampian,45 to 64,Female,DALY rate,294.3,Yes,A
2016,Asthma,NHS Grampian,65 to 84,Female,DALY rate,338.3,Yes,A
2016,Asthma,NHS Grampian,85 and over,Female,DALY rate,524.2,Yes,A
2016,Asthma,NHS Grampian,Under 15,Both sexes,DALY rate,457.7,Yes,A
2016,Asthma,NHS Grampian,15 to 24,Both sexes,DALY rate,318,Yes,A
2016,Asthma,NHS Grampian,25 to 44,Both sexes,DALY rate,361.2,Yes,A
2016,Asthma,NHS Grampian,45 to 64,Both sexes,DALY rate,227.2,Yes,A
2016,Asthma,NHS Grampian,65 to 84,Both sexes,DALY rate,242.4,Yes,A
2016,Asthma,NHS Grampian,85 and over,Both sexes,DALY rate,580.3,No,A
2016,Chronic obstructive pulmonary disease,NHS Grampian,Under 15,Male,DALY rate,0.3,Yes,G
2016,Chronic obstructive pulmonary disease,NHS Grampian,15 to 24,Male,DALY rate,10.6,Yes,G
2016,Chronic obstructive pulmonary disease,NHS Grampian,25 to 44,Male,DALY rate,176.7,Yes,G
2016,Chronic obstructive pulmonary disease,NHS Grampian,45 to 64,Male,DALY rate,559.2,No,G
2016,Chronic obstructive pulmonary disease,NHS Grampian,65 to 84,Male,DALY rate,"4,646.10",No,G
2016,Chronic obstructive pulmonary disease,NHS Grampian,85 and over,Male,DALY rate,"8,893.10",No,G
2016,Chronic obstructive pulmonary disease,NHS Grampian,Under 15,Female,DALY rate,0.2,Yes,G
2016,Chronic obstructive pulmonary disease,NHS Grampian,15 to 24,Female,DALY rate,14,Yes,G
2016,Chronic obstructive pulmonary disease,NHS Grampian,25 to 44,Female,DALY rate,126.8,Yes,G
2016,Chronic obstructive pulmonary disease,NHS Grampian,45 to 64,Female,DALY rate,"1,015.00",No,G
2016,Chronic obstructive pulmonary disease,NHS Grampian,65 to 84,Female,DALY rate,"3,662.30",No,G
2016,Chronic obstructive pulmonary disease,NHS Grampian,85 and over,Female,DALY rate,"5,342.40",No,G
2016,Chronic obstructive pulmonary disease,NHS Grampian,Under 15,Both sexes,DALY rate,0.2,Yes,G
2016,Chronic obstructive pulmonary disease,NHS Grampian,15 to 24,Both sexes,DALY rate,12.3,Yes,G
2016,Chronic obstructive pulmonary disease,NHS Grampian,25 to 44,Both sexes,DALY rate,152.4,Yes,G
2016,Chronic obstructive pulmonary disease,NHS Grampian,45 to 64,Both sexes,DALY rate,787.2,No,G
2016,Chronic obstructive pulmonary disease,NHS Grampian,65 to 84,Both sexes,DALY rate,"4,089.90",No,G
2016,Chronic obstructive pulmonary disease,NHS Grampian,85 and over,Both sexes,DALY rate,"6,504.20",No,G
2016,Other chronic respiratory diseases,NHS Grampian,Under 15,Male,DALY rate,0.8,Yes,G
2016,Other chronic respiratory diseases,NHS Grampian,15 to 24,Male,DALY rate,2.1,Yes,G
2016,Other chronic respiratory diseases,NHS Grampian,25 to 44,Male,DALY rate,8.2,Yes,G
2016,Other chronic respiratory diseases,NHS Grampian,45 to 64,Male,DALY rate,219.6,Yes,G
2016,Other chronic respiratory diseases,NHS Grampian,65 to 84,Male,DALY rate,"1,202.70",No,G
2016,Other chronic respiratory diseases,NHS Grampian,85 and over,Male,DALY rate,"2,305.30",No,G
2016,Other chronic respiratory diseases,NHS Grampian,Under 15,Female,DALY rate,0.8,Yes,G
2016,Other chronic respiratory diseases,NHS Grampian,15 to 24,Female,DALY rate,1.1,Yes,G
2016,Other chronic respiratory diseases,NHS Grampian,25 to 44,Female,DALY rate,5.4,Yes,G
2016,Other chronic respiratory diseases,NHS Grampian,45 to 64,Female,DALY rate,213.8,Yes,G
2016,Other chronic respiratory diseases,NHS Grampian,65 to 84,Female,DALY rate,636.1,No,G
2016,Other chronic respiratory diseases,NHS Grampian,85 and over,Female,DALY rate,551.6,Yes,G
2016,Other chronic respiratory diseases,NHS Grampian,Under 15,Both sexes,DALY rate,0.8,Yes,G
2016,Other chronic respiratory diseases,NHS Grampian,15 to 24,Both sexes,DALY rate,1.6,Yes,G
2016,Other chronic respiratory diseases,NHS Grampian,25 to 44,Both sexes,DALY rate,6.8,Yes,G
2016,Other chronic respiratory diseases,NHS Grampian,45 to 64,Both sexes,DALY rate,216.4,No,G
2016,Other chronic respiratory diseases,NHS Grampian,65 to 84,Both sexes,DALY rate,889.6,No,G
2016,Other chronic respiratory diseases,NHS Grampian,85 and over,Both sexes,DALY rate,"1,143.20",No,G
2016,Alcohol use disorders,NHS Grampian,Under 15,Male,DALY rate,0,Yes,A
2016,Alcohol use disorders,NHS Grampian,15 to 24,Male,DALY rate,156.1,Yes,A
2016,Alcohol use disorders,NHS Grampian,25 to 44,Male,DALY rate,447.8,Yes,A
2016,Alcohol use disorders,NHS Grampian,45 to 64,Male,DALY rate,"1,078.70",No,A
2016,Alcohol use disorders,NHS Grampian,65 to 84,Male,DALY rate,"1,201.80",No,A
2016,Alcohol use disorders,NHS Grampian,85 and over,Male,DALY rate,396.3,Yes,A
2016,Alcohol use disorders,NHS Grampian,Under 15,Female,DALY rate,0,Yes,A
2016,Alcohol use disorders,NHS Grampian,15 to 24,Female,DALY rate,57.5,Yes,A
2016,Alcohol use disorders,NHS Grampian,25 to 44,Female,DALY rate,131,Yes,A
2016,Alcohol use disorders,NHS Grampian,45 to 64,Female,DALY rate,553.2,No,A
2016,Alcohol use disorders,NHS Grampian,65 to 84,Female,DALY rate,248.1,Yes,A
2016,Alcohol use disorders,NHS Grampian,85 and over,Female,DALY rate,39.3,Yes,A
2016,Alcohol use disorders,NHS Grampian,Under 15,Both sexes,DALY rate,0,Yes,A
2016,Alcohol use disorders,NHS Grampian,15 to 24,Both sexes,DALY rate,107.4,Yes,A
2016,Alcohol use disorders,NHS Grampian,25 to 44,Both sexes,DALY rate,291.9,Yes,A
2016,Alcohol use disorders,NHS Grampian,45 to 64,Both sexes,DALY rate,814.6,No,A
2016,Alcohol use disorders,NHS Grampian,65 to 84,Both sexes,DALY rate,706.5,No,A
2016,Alcohol use disorders,NHS Grampian,85 and over,Both sexes,DALY rate,168.7,Yes,A
2016,Drug use disorders,NHS Grampian,Under 15,Male,DALY rate,0.2,Yes,A
2016,Drug use disorders,NHS Grampian,15 to 24,Male,DALY rate,"1,622.20",No,A
2016,Drug use disorders,NHS Grampian,25 to 44,Male,DALY rate,"2,064.20",No,A
2016,Drug use disorders,NHS Grampian,45 to 64,Male,DALY rate,"1,016.80",No,A
2016,Drug use disorders,NHS Grampian,65 to 84,Male,DALY rate,19.5,Yes,A
2016,Drug use disorders,NHS Grampian,85 and over,Male,DALY rate,11.7,Yes,A
2016,Drug use disorders,NHS Grampian,Under 15,Female,DALY rate,2.3,Yes,A
2016,Drug use disorders,NHS Grampian,15 to 24,Female,DALY rate,440.6,Yes,A
2016,Drug use disorders,NHS Grampian,25 to 44,Female,DALY rate,"1,096.70",No,A
2016,Drug use disorders,NHS Grampian,45 to 64,Female,DALY rate,757.2,No,A
2016,Drug use disorders,NHS Grampian,65 to 84,Female,DALY rate,59.1,Yes,A
2016,Drug use disorders,NHS Grampian,85 and over,Female,DALY rate,8.2,Yes,A
2016,Drug use disorders,NHS Grampian,Under 15,Both sexes,DALY rate,1.3,Yes,A
2016,Drug use disorders,NHS Grampian,15 to 24,Both sexes,DALY rate,"1,035.80",No,A
2016,Drug use disorders,NHS Grampian,25 to 44,Both sexes,DALY rate,"1,591.20",No,A
2016,Drug use disorders,NHS Grampian,45 to 64,Both sexes,DALY rate,885.9,No,A
2016,Drug use disorders,NHS Grampian,65 to 84,Both sexes,DALY rate,40.4,Yes,A
2016,Drug use disorders,NHS Grampian,85 and over,Both sexes,DALY rate,9.5,Yes,A
2016,Peptic ulcer disease,NHS Grampian,Under 15,Male,DALY rate,0,Yes,G
2016,Peptic ulcer disease,NHS Grampian,15 to 24,Male,DALY rate,0.3,Yes,G
2016,Peptic ulcer disease,NHS Grampian,25 to 44,Male,DALY rate,0.8,Yes,G
2016,Peptic ulcer disease,NHS Grampian,45 to 64,Male,DALY rate,42.1,Yes,G
2016,Peptic ulcer disease,NHS Grampian,65 to 84,Male,DALY rate,537.7,No,G
2016,Peptic ulcer disease,NHS Grampian,85 and over,Male,DALY rate,777.5,Yes,G
2016,Peptic ulcer disease,NHS Grampian,Under 15,Female,DALY rate,0,Yes,G
2016,Peptic ulcer disease,NHS Grampian,15 to 24,Female,DALY rate,0.2,Yes,G
2016,Peptic ulcer disease,NHS Grampian,25 to 44,Female,DALY rate,0.5,Yes,G
2016,Peptic ulcer disease,NHS Grampian,45 to 64,Female,DALY rate,1.5,Yes,G
2016,Peptic ulcer disease,NHS Grampian,65 to 84,Female,DALY rate,150.5,Yes,G
2016,Peptic ulcer disease,NHS Grampian,85 and over,Female,DALY rate,510.2,Yes,G
2016,Peptic ulcer disease,NHS Grampian,Under 15,Both sexes,DALY rate,0,Yes,G
2016,Peptic ulcer disease,NHS Grampian,15 to 24,Both sexes,DALY rate,0.2,Yes,G
2016,Peptic ulcer disease,NHS Grampian,25 to 44,Both sexes,DALY rate,0.7,Yes,G
2016,Peptic ulcer disease,NHS Grampian,45 to 64,Both sexes,DALY rate,21.8,Yes,G
2016,Peptic ulcer disease,NHS Grampian,65 to 84,Both sexes,DALY rate,326.9,No,G
2016,Peptic ulcer disease,NHS Grampian,85 and over,Both sexes,DALY rate,594.6,No,G
2016,Inflammatory bowel disease,NHS Grampian,Under 15,Male,DALY rate,7.5,Yes,A
2016,Inflammatory bowel disease,NHS Grampian,15 to 24,Male,DALY rate,51.7,Yes,A
2016,Inflammatory bowel disease,NHS Grampian,25 to 44,Male,DALY rate,100.1,Yes,A
2016,Inflammatory bowel disease,NHS Grampian,45 to 64,Male,DALY rate,172.9,Yes,A
2016,Inflammatory bowel disease,NHS Grampian,65 to 84,Male,DALY rate,150,Yes,A
2016,Inflammatory bowel disease,NHS Grampian,85 and over,Male,DALY rate,313.9,Yes,A
2016,Inflammatory bowel disease,NHS Grampian,Under 15,Female,DALY rate,7,Yes,A
2016,Inflammatory bowel disease,NHS Grampian,15 to 24,Female,DALY rate,39.9,Yes,A
2016,Inflammatory bowel disease,NHS Grampian,25 to 44,Female,DALY rate,108.4,Yes,A
2016,Inflammatory bowel disease,NHS Grampian,45 to 64,Female,DALY rate,133.4,Yes,A
2016,Inflammatory bowel disease,NHS Grampian,65 to 84,Female,DALY rate,162.9,Yes,A
2016,Inflammatory bowel disease,NHS Grampian,85 and over,Female,DALY rate,301.3,Yes,A
2016,Inflammatory bowel disease,NHS Grampian,Under 15,Both sexes,DALY rate,7.2,Yes,A
2016,Inflammatory bowel disease,NHS Grampian,15 to 24,Both sexes,DALY rate,45.9,Yes,A
2016,Inflammatory bowel disease,NHS Grampian,25 to 44,Both sexes,DALY rate,104.2,Yes,A
2016,Inflammatory bowel disease,NHS Grampian,45 to 64,Both sexes,DALY rate,153.1,Yes,A
2016,Inflammatory bowel disease,NHS Grampian,65 to 84,Both sexes,DALY rate,158.1,Yes,A
2016,Inflammatory bowel disease,NHS Grampian,85 and over,Both sexes,DALY rate,317,Yes,A
2016,Gallbladder and biliary diseases,NHS Grampian,Under 15,Male,DALY rate,0.5,Yes,A
2016,Gallbladder and biliary diseases,NHS Grampian,15 to 24,Male,DALY rate,3.4,Yes,A
2016,Gallbladder and biliary diseases,NHS Grampian,25 to 44,Male,DALY rate,16,Yes,A
2016,Gallbladder and biliary diseases,NHS Grampian,45 to 64,Male,DALY rate,44,Yes,A
2016,Gallbladder and biliary diseases,NHS Grampian,65 to 84,Male,DALY rate,407.6,No,A
2016,Gallbladder and biliary diseases,NHS Grampian,85 and over,Male,DALY rate,999,Yes,A
2016,Gallbladder and biliary diseases,NHS Grampian,Under 15,Female,DALY rate,0.9,Yes,A
2016,Gallbladder and biliary diseases,NHS Grampian,15 to 24,Female,DALY rate,21.1,Yes,A
2016,Gallbladder and biliary diseases,NHS Grampian,25 to 44,Female,DALY rate,69.3,Yes,A
2016,Gallbladder and biliary diseases,NHS Grampian,45 to 64,Female,DALY rate,85.2,Yes,A
2016,Gallbladder and biliary diseases,NHS Grampian,65 to 84,Female,DALY rate,281.5,No,A
2016,Gallbladder and biliary diseases,NHS Grampian,85 and over,Female,DALY rate,939.5,No,A
2016,Gallbladder and biliary diseases,NHS Grampian,Under 15,Both sexes,DALY rate,0.7,Yes,A
2016,Gallbladder and biliary diseases,NHS Grampian,15 to 24,Both sexes,DALY rate,12.2,Yes,A
2016,Gallbladder and biliary diseases,NHS Grampian,25 to 44,Both sexes,DALY rate,42.2,Yes,A
2016,Gallbladder and biliary diseases,NHS Grampian,45 to 64,Both sexes,DALY rate,64.7,Yes,A
2016,Gallbladder and biliary diseases,NHS Grampian,65 to 84,Both sexes,DALY rate,340.9,No,A
2016,Gallbladder and biliary diseases,NHS Grampian,85 and over,Both sexes,DALY rate,970.3,No,A
2016,Pancreatitis,NHS Grampian,Under 15,Male,DALY rate,1,Yes,G
2016,Pancreatitis,NHS Grampian,15 to 24,Male,DALY rate,3.4,Yes,G
2016,Pancreatitis,NHS Grampian,25 to 44,Male,DALY rate,81.8,Yes,G
2016,Pancreatitis,NHS Grampian,45 to 64,Male,DALY rate,186.6,Yes,G
2016,Pancreatitis,NHS Grampian,65 to 84,Male,DALY rate,205.1,Yes,G
2016,Pancreatitis,NHS Grampian,85 and over,Male,DALY rate,280.2,Yes,G
2016,Pancreatitis,NHS Grampian,Under 15,Female,DALY rate,1.9,Yes,G
2016,Pancreatitis,NHS Grampian,15 to 24,Female,DALY rate,2.9,Yes,G
2016,Pancreatitis,NHS Grampian,25 to 44,Female,DALY rate,10.6,Yes,G
2016,Pancreatitis,NHS Grampian,45 to 64,Female,DALY rate,60,Yes,G
2016,Pancreatitis,NHS Grampian,65 to 84,Female,DALY rate,194.6,Yes,G
2016,Pancreatitis,NHS Grampian,85 and over,Female,DALY rate,159.9,Yes,G
2016,Pancreatitis,NHS Grampian,Under 15,Both sexes,DALY rate,1.5,Yes,G
2016,Pancreatitis,NHS Grampian,15 to 24,Both sexes,DALY rate,3.1,Yes,G
2016,Pancreatitis,NHS Grampian,25 to 44,Both sexes,DALY rate,46.6,Yes,G
2016,Pancreatitis,NHS Grampian,45 to 64,Both sexes,DALY rate,123.1,Yes,G
2016,Pancreatitis,NHS Grampian,65 to 84,Both sexes,DALY rate,195,No,G
2016,Pancreatitis,NHS Grampian,85 and over,Both sexes,DALY rate,190.5,Yes,G
2016,Cirrhosis and other chronic liver diseases,NHS Grampian,Under 15,Male,DALY rate,1.8,Yes,G
2016,Cirrhosis and other chronic liver diseases,NHS Grampian,15 to 24,Male,DALY rate,4,Yes,G
2016,Cirrhosis and other chronic liver diseases,NHS Grampian,25 to 44,Male,DALY rate,511,No,G
2016,Cirrhosis and other chronic liver diseases,NHS Grampian,45 to 64,Male,DALY rate,"1,496.10",No,G
2016,Cirrhosis and other chronic liver diseases,NHS Grampian,65 to 84,Male,DALY rate,"1,226.50",No,G
2016,Cirrhosis and other chronic liver diseases,NHS Grampian,85 and over,Male,DALY rate,238.9,Yes,G
2016,Cirrhosis and other chronic liver diseases,NHS Grampian,Under 15,Female,DALY rate,1.1,Yes,G
2016,Cirrhosis and other chronic liver diseases,NHS Grampian,15 to 24,Female,DALY rate,3.9,Yes,G
2016,Cirrhosis and other chronic liver diseases,NHS Grampian,25 to 44,Female,DALY rate,573,No,G
2016,Cirrhosis and other chronic liver diseases,NHS Grampian,45 to 64,Female,DALY rate,828.9,No,G
2016,Cirrhosis and other chronic liver diseases,NHS Grampian,65 to 84,Female,DALY rate,396.6,No,G
2016,Cirrhosis and other chronic liver diseases,NHS Grampian,85 and over,Female,DALY rate,209.1,Yes,G
2016,Cirrhosis and other chronic liver diseases,NHS Grampian,Under 15,Both sexes,DALY rate,1.4,Yes,G
2016,Cirrhosis and other chronic liver diseases,NHS Grampian,15 to 24,Both sexes,DALY rate,3.9,Yes,G
2016,Cirrhosis and other chronic liver diseases,NHS Grampian,25 to 44,Both sexes,DALY rate,542.9,No,G
2016,Cirrhosis and other chronic liver diseases,NHS Grampian,45 to 64,Both sexes,DALY rate,"1,161.60",No,G
2016,Cirrhosis and other chronic liver diseases,NHS Grampian,65 to 84,Both sexes,DALY rate,784,No,G
2016,Cirrhosis and other chronic liver diseases,NHS Grampian,85 and over,Both sexes,DALY rate,220,Yes,G
2016,Other digestive diseases,NHS Grampian,Under 15,Male,DALY rate,200.6,Yes,A
2016,Other digestive diseases,NHS Grampian,15 to 24,Male,DALY rate,13.7,Yes,A
2016,Other digestive diseases,NHS Grampian,25 to 44,Male,DALY rate,32.8,Yes,A
2016,Other digestive diseases,NHS Grampian,45 to 64,Male,DALY rate,336.9,No,A
2016,Other digestive diseases,NHS Grampian,65 to 84,Male,DALY rate,"1,184.50",No,A
2016,Other digestive diseases,NHS Grampian,85 and over,Male,DALY rate,"1,717.80",No,A
2016,Other digestive diseases,NHS Grampian,Under 15,Female,DALY rate,12.3,Yes,A
2016,Other digestive diseases,NHS Grampian,15 to 24,Female,DALY rate,6.1,Yes,A
2016,Other digestive diseases,NHS Grampian,25 to 44,Female,DALY rate,91.1,Yes,A
2016,Other digestive diseases,NHS Grampian,45 to 64,Female,DALY rate,163.9,Yes,A
2016,Other digestive diseases,NHS Grampian,65 to 84,Female,DALY rate,"1,452.50",No,A
2016,Other digestive diseases,NHS Grampian,85 and over,Female,DALY rate,"2,803.20",No,A
2016,Other digestive diseases,NHS Grampian,Under 15,Both sexes,DALY rate,108.6,Yes,A
2016,Other digestive diseases,NHS Grampian,15 to 24,Both sexes,DALY rate,9.9,Yes,A
2016,Other digestive diseases,NHS Grampian,25 to 44,Both sexes,DALY rate,61.6,Yes,A
2016,Other digestive diseases,NHS Grampian,45 to 64,Both sexes,DALY rate,250.1,No,A
2016,Other digestive diseases,NHS Grampian,65 to 84,Both sexes,DALY rate,"1,346.90",No,A
2016,Other digestive diseases,NHS Grampian,85 and over,Both sexes,DALY rate,"2,440.60",No,A
2016,Alzheimer's disease and other dementias,NHS Grampian,Under 15,Male,DALY rate,0,Yes,G
2016,Alzheimer's disease and other dementias,NHS Grampian,15 to 24,Male,DALY rate,0,Yes,G
2016,Alzheimer's disease and other dementias,NHS Grampian,25 to 44,Male,DALY rate,0.5,Yes,G
2016,Alzheimer's disease and other dementias,NHS Grampian,45 to 64,Male,DALY rate,117.4,Yes,G
2016,Alzheimer's disease and other dementias,NHS Grampian,65 to 84,Male,DALY rate,"4,127.90",No,G
2016,Alzheimer's disease and other dementias,NHS Grampian,85 and over,Male,DALY rate,"25,495.90",No,G
2016,Alzheimer's disease and other dementias,NHS Grampian,Under 15,Female,DALY rate,1,Yes,G
2016,Alzheimer's disease and other dementias,NHS Grampian,15 to 24,Female,DALY rate,0,Yes,G
2016,Alzheimer's disease and other dementias,NHS Grampian,25 to 44,Female,DALY rate,2,Yes,G
2016,Alzheimer's disease and other dementias,NHS Grampian,45 to 64,Female,DALY rate,154.2,Yes,G
2016,Alzheimer's disease and other dementias,NHS Grampian,65 to 84,Female,DALY rate,"4,266.60",No,G
2016,Alzheimer's disease and other dementias,NHS Grampian,85 and over,Female,DALY rate,"33,947.20",No,G
2016,Alzheimer's disease and other dementias,NHS Grampian,Under 15,Both sexes,DALY rate,0.5,Yes,G
2016,Alzheimer's disease and other dementias,NHS Grampian,15 to 24,Both sexes,DALY rate,0,Yes,G
2016,Alzheimer's disease and other dementias,NHS Grampian,25 to 44,Both sexes,DALY rate,1.2,Yes,G
2016,Alzheimer's disease and other dementias,NHS Grampian,45 to 64,Both sexes,DALY rate,135.9,No,G
2016,Alzheimer's disease and other dementias,NHS Grampian,65 to 84,Both sexes,DALY rate,"4,217.00",No,G
2016,Alzheimer's disease and other dementias,NHS Grampian,85 and over,Both sexes,DALY rate,"31,314.20",No,G
2016,Parkinson's disease,NHS Grampian,Under 15,Male,DALY rate,1,Yes,G
2016,Parkinson's disease,NHS Grampian,15 to 24,Male,DALY rate,0,Yes,G
2016,Parkinson's disease,NHS Grampian,25 to 44,Male,DALY rate,1.2,Yes,G
2016,Parkinson's disease,NHS Grampian,45 to 64,Male,DALY rate,32.3,Yes,G
2016,Parkinson's disease,NHS Grampian,65 to 84,Male,DALY rate,805.1,No,G
2016,Parkinson's disease,NHS Grampian,85 and over,Male,DALY rate,"1,788.50",No,G
2016,Parkinson's disease,NHS Grampian,Under 15,Female,DALY rate,0,Yes,G
2016,Parkinson's disease,NHS Grampian,15 to 24,Female,DALY rate,0,Yes,G
2016,Parkinson's disease,NHS Grampian,25 to 44,Female,DALY rate,0.7,Yes,G
2016,Parkinson's disease,NHS Grampian,45 to 64,Female,DALY rate,25.4,Yes,G
2016,Parkinson's disease,NHS Grampian,65 to 84,Female,DALY rate,286.2,No,G
2016,Parkinson's disease,NHS Grampian,85 and over,Female,DALY rate,"1,021.60",No,G
2016,Parkinson's disease,NHS Grampian,Under 15,Both sexes,DALY rate,0.5,Yes,G
2016,Parkinson's disease,NHS Grampian,15 to 24,Both sexes,DALY rate,0,Yes,G
2016,Parkinson's disease,NHS Grampian,25 to 44,Both sexes,DALY rate,1,Yes,G
2016,Parkinson's disease,NHS Grampian,45 to 64,Both sexes,DALY rate,28.8,Yes,G
2016,Parkinson's disease,NHS Grampian,65 to 84,Both sexes,DALY rate,518.3,No,G
2016,Parkinson's disease,NHS Grampian,85 and over,Both sexes,DALY rate,"1,286.30",No,G
2016,Epilepsy,NHS Grampian,Under 15,Male,DALY rate,57.2,Yes,A
2016,Epilepsy,NHS Grampian,15 to 24,Male,DALY rate,190.9,Yes,A
2016,Epilepsy,NHS Grampian,25 to 44,Male,DALY rate,218.4,Yes,A
2016,Epilepsy,NHS Grampian,45 to 64,Male,DALY rate,212.6,Yes,A
2016,Epilepsy,NHS Grampian,65 to 84,Male,DALY rate,235.4,Yes,A
2016,Epilepsy,NHS Grampian,85 and over,Male,DALY rate,555.9,Yes,A
2016,Epilepsy,NHS Grampian,Under 15,Female,DALY rate,238,Yes,A
2016,Epilepsy,NHS Grampian,15 to 24,Female,DALY rate,110.8,Yes,A
2016,Epilepsy,NHS Grampian,25 to 44,Female,DALY rate,303.5,Yes,A
2016,Epilepsy,NHS Grampian,45 to 64,Female,DALY rate,186.7,Yes,A
2016,Epilepsy,NHS Grampian,65 to 84,Female,DALY rate,204.3,Yes,A
2016,Epilepsy,NHS Grampian,85 and over,Female,DALY rate,287.2,Yes,A
2016,Epilepsy,NHS Grampian,Under 15,Both sexes,DALY rate,145.4,Yes,A
2016,Epilepsy,NHS Grampian,15 to 24,Both sexes,DALY rate,151.8,Yes,A
2016,Epilepsy,NHS Grampian,25 to 44,Both sexes,DALY rate,259.6,Yes,A
2016,Epilepsy,NHS Grampian,45 to 64,Both sexes,DALY rate,199.7,Yes,A
2016,Epilepsy,NHS Grampian,65 to 84,Both sexes,DALY rate,217.8,Yes,A
2016,Epilepsy,NHS Grampian,85 and over,Both sexes,DALY rate,382.6,Yes,A
2016,Multiple sclerosis,NHS Grampian,Under 15,Male,DALY rate,0.1,Yes,G
2016,Multiple sclerosis,NHS Grampian,15 to 24,Male,DALY rate,1.7,Yes,G
2016,Multiple sclerosis,NHS Grampian,25 to 44,Male,DALY rate,21.1,Yes,G
2016,Multiple sclerosis,NHS Grampian,45 to 64,Male,DALY rate,135.6,Yes,G
2016,Multiple sclerosis,NHS Grampian,65 to 84,Male,DALY rate,388.6,No,G
2016,Multiple sclerosis,NHS Grampian,85 and over,Male,DALY rate,10.1,Yes,G
2016,Multiple sclerosis,NHS Grampian,Under 15,Female,DALY rate,0.1,Yes,G
2016,Multiple sclerosis,NHS Grampian,15 to 24,Female,DALY rate,5.9,Yes,G
2016,Multiple sclerosis,NHS Grampian,25 to 44,Female,DALY rate,128.8,Yes,G
2016,Multiple sclerosis,NHS Grampian,45 to 64,Female,DALY rate,402.1,No,G
2016,Multiple sclerosis,NHS Grampian,65 to 84,Female,DALY rate,267.9,Yes,G
2016,Multiple sclerosis,NHS Grampian,85 and over,Female,DALY rate,178.4,Yes,G
2016,Multiple sclerosis,NHS Grampian,Under 15,Both sexes,DALY rate,0.1,Yes,G
2016,Multiple sclerosis,NHS Grampian,15 to 24,Both sexes,DALY rate,3.8,Yes,G
2016,Multiple sclerosis,NHS Grampian,25 to 44,Both sexes,DALY rate,74.3,Yes,G
2016,Multiple sclerosis,NHS Grampian,45 to 64,Both sexes,DALY rate,269.8,No,G
2016,Multiple sclerosis,NHS Grampian,65 to 84,Both sexes,DALY rate,324.4,No,G
2016,Multiple sclerosis,NHS Grampian,85 and over,Both sexes,DALY rate,116.7,Yes,G
2016,Headache disorders,NHS Grampian,Under 15,Male,DALY rate,284.7,Yes,R
2016,Headache disorders,NHS Grampian,15 to 24,Male,DALY rate,741.9,Yes,R
2016,Headache disorders,NHS Grampian,25 to 44,Male,DALY rate,860.2,Yes,R
2016,Headache disorders,NHS Grampian,45 to 64,Male,DALY rate,714,Yes,R
2016,Headache disorders,NHS Grampian,65 to 84,Male,DALY rate,383.4,Yes,R
2016,Headache disorders,NHS Grampian,85 and over,Male,DALY rate,227.7,Yes,R
2016,Headache disorders,NHS Grampian,Under 15,Female,DALY rate,318.6,Yes,R
2016,Headache disorders,NHS Grampian,15 to 24,Female,DALY rate,"1,500.10",Yes,R
2016,Headache disorders,NHS Grampian,25 to 44,Female,DALY rate,"2,106.80",Yes,R
2016,Headache disorders,NHS Grampian,45 to 64,Female,DALY rate,"1,597.90",Yes,R
2016,Headache disorders,NHS Grampian,65 to 84,Female,DALY rate,678.5,Yes,R
2016,Headache disorders,NHS Grampian,85 and over,Female,DALY rate,268.5,Yes,R
2016,Headache disorders,NHS Grampian,Under 15,Both sexes,DALY rate,301.3,Yes,R
2016,Headache disorders,NHS Grampian,15 to 24,Both sexes,DALY rate,"1,116.90",Yes,R
2016,Headache disorders,NHS Grampian,25 to 44,Both sexes,DALY rate,"1,471.20",Yes,R
2016,Headache disorders,NHS Grampian,45 to 64,Both sexes,DALY rate,"1,159.20",Yes,R
2016,Headache disorders,NHS Grampian,65 to 84,Both sexes,DALY rate,538,Yes,R
2016,Headache disorders,NHS Grampian,85 and over,Both sexes,DALY rate,253.6,Yes,R
2016,Other neurological disorders,NHS Grampian,Under 15,Male,DALY rate,4.6,Yes,G
2016,Other neurological disorders,NHS Grampian,15 to 24,Male,DALY rate,182.9,Yes,G
2016,Other neurological disorders,NHS Grampian,25 to 44,Male,DALY rate,80.3,Yes,G
2016,Other neurological disorders,NHS Grampian,45 to 64,Male,DALY rate,373.3,No,G
2016,Other neurological disorders,NHS Grampian,65 to 84,Male,DALY rate,521.3,No,G
2016,Other neurological disorders,NHS Grampian,85 and over,Male,DALY rate,636,Yes,G
2016,Other neurological disorders,NHS Grampian,Under 15,Female,DALY rate,3.4,Yes,G
2016,Other neurological disorders,NHS Grampian,15 to 24,Female,DALY rate,1.6,Yes,G
2016,Other neurological disorders,NHS Grampian,25 to 44,Female,DALY rate,6,Yes,G
2016,Other neurological disorders,NHS Grampian,45 to 64,Female,DALY rate,242.6,No,G
2016,Other neurological disorders,NHS Grampian,65 to 84,Female,DALY rate,371.4,No,G
2016,Other neurological disorders,NHS Grampian,85 and over,Female,DALY rate,463.5,Yes,G
2016,Other neurological disorders,NHS Grampian,Under 15,Both sexes,DALY rate,4,Yes,G
2016,Other neurological disorders,NHS Grampian,15 to 24,Both sexes,DALY rate,92.7,Yes,G
2016,Other neurological disorders,NHS Grampian,25 to 44,Both sexes,DALY rate,44,Yes,G
2016,Other neurological disorders,NHS Grampian,45 to 64,Both sexes,DALY rate,307.8,No,G
2016,Other neurological disorders,NHS Grampian,65 to 84,Both sexes,DALY rate,444.2,No,G
2016,Other neurological disorders,NHS Grampian,85 and over,Both sexes,DALY rate,539,No,G
2016,Schizophrenia,NHS Grampian,Under 15,Male,DALY rate,0,Yes,G
2016,Schizophrenia,NHS Grampian,15 to 24,Male,DALY rate,131.9,Yes,G
2016,Schizophrenia,NHS Grampian,25 to 44,Male,DALY rate,337.5,Yes,G
2016,Schizophrenia,NHS Grampian,45 to 64,Male,DALY rate,322.8,Yes,G
2016,Schizophrenia,NHS Grampian,65 to 84,Male,DALY rate,128.3,Yes,G
2016,Schizophrenia,NHS Grampian,85 and over,Male,DALY rate,38.7,Yes,G
2016,Schizophrenia,NHS Grampian,Under 15,Female,DALY rate,0,Yes,G
2016,Schizophrenia,NHS Grampian,15 to 24,Female,DALY rate,17.6,Yes,G
2016,Schizophrenia,NHS Grampian,25 to 44,Female,DALY rate,126,Yes,G
2016,Schizophrenia,NHS Grampian,45 to 64,Female,DALY rate,222,Yes,G
2016,Schizophrenia,NHS Grampian,65 to 84,Female,DALY rate,161.1,Yes,G
2016,Schizophrenia,NHS Grampian,85 and over,Female,DALY rate,298.4,Yes,G
2016,Schizophrenia,NHS Grampian,Under 15,Both sexes,DALY rate,0,Yes,G
2016,Schizophrenia,NHS Grampian,15 to 24,Both sexes,DALY rate,75,Yes,G
2016,Schizophrenia,NHS Grampian,25 to 44,Both sexes,DALY rate,233.6,Yes,G
2016,Schizophrenia,NHS Grampian,45 to 64,Both sexes,DALY rate,272,Yes,G
2016,Schizophrenia,NHS Grampian,65 to 84,Both sexes,DALY rate,146.6,Yes,G
2016,Schizophrenia,NHS Grampian,85 and over,Both sexes,DALY rate,202.8,Yes,G
2016,Depression,NHS Grampian,Under 15,Male,DALY rate,0,Yes,G
2016,Depression,NHS Grampian,15 to 24,Male,DALY rate,658.5,Yes,G
2016,Depression,NHS Grampian,25 to 44,Male,DALY rate,"1,388.40",Yes,G
2016,Depression,NHS Grampian,45 to 64,Male,DALY rate,"1,444.00",Yes,G
2016,Depression,NHS Grampian,65 to 84,Male,DALY rate,"1,153.30",Yes,G
2016,Depression,NHS Grampian,85 and over,Male,DALY rate,"1,450.30",Yes,G
2016,Depression,NHS Grampian,Under 15,Female,DALY rate,0,Yes,G
2016,Depression,NHS Grampian,15 to 24,Female,DALY rate,693.4,Yes,G
2016,Depression,NHS Grampian,25 to 44,Female,DALY rate,"1,373.40",Yes,G
2016,Depression,NHS Grampian,45 to 64,Female,DALY rate,"1,441.40",Yes,G
2016,Depression,NHS Grampian,65 to 84,Female,DALY rate,"1,116.90",Yes,G
2016,Depression,NHS Grampian,85 and over,Female,DALY rate,"1,125.30",Yes,G
2016,Depression,NHS Grampian,Under 15,Both sexes,DALY rate,0,Yes,G
2016,Depression,NHS Grampian,15 to 24,Both sexes,DALY rate,675.1,Yes,G
2016,Depression,NHS Grampian,25 to 44,Both sexes,DALY rate,"1,381.50",Yes,G
2016,Depression,NHS Grampian,45 to 64,Both sexes,DALY rate,"1,442.10",Yes,G
2016,Depression,NHS Grampian,65 to 84,Both sexes,DALY rate,"1,132.80",Yes,G
2016,Depression,NHS Grampian,85 and over,Both sexes,DALY rate,"1,227.90",Yes,G
2016,Anxiety disorders,NHS Grampian,Under 15,Male,DALY rate,0,Yes,G
2016,Anxiety disorders,NHS Grampian,15 to 24,Male,DALY rate,315.5,Yes,G
2016,Anxiety disorders,NHS Grampian,25 to 44,Male,DALY rate,663.6,Yes,G
2016,Anxiety disorders,NHS Grampian,45 to 64,Male,DALY rate,747,Yes,G
2016,Anxiety disorders,NHS Grampian,65 to 84,Male,DALY rate,633.3,Yes,G
2016,Anxiety disorders,NHS Grampian,85 and over,Male,DALY rate,737.7,Yes,G
2016,Anxiety disorders,NHS Grampian,Under 15,Female,DALY rate,0,Yes,G
2016,Anxiety disorders,NHS Grampian,15 to 24,Female,DALY rate,570.9,Yes,G
2016,Anxiety disorders,NHS Grampian,25 to 44,Female,DALY rate,"1,141.70",Yes,G
2016,Anxiety disorders,NHS Grampian,45 to 64,Female,DALY rate,"1,254.90",Yes,G
2016,Anxiety disorders,NHS Grampian,65 to 84,Female,DALY rate,"1,019.50",Yes,G
2016,Anxiety disorders,NHS Grampian,85 and over,Female,DALY rate,958.5,Yes,G
2016,Anxiety disorders,NHS Grampian,Under 15,Both sexes,DALY rate,0,Yes,G
2016,Anxiety disorders,NHS Grampian,15 to 24,Both sexes,DALY rate,441.5,Yes,G
2016,Anxiety disorders,NHS Grampian,25 to 44,Both sexes,DALY rate,898.6,Yes,G
2016,Anxiety disorders,NHS Grampian,45 to 64,Both sexes,DALY rate,"1,002.20",Yes,G
2016,Anxiety disorders,NHS Grampian,65 to 84,Both sexes,DALY rate,838.4,Yes,G
2016,Anxiety disorders,NHS Grampian,85 and over,Both sexes,DALY rate,874.4,Yes,G
2016,Other mental health disorders,NHS Grampian,Under 15,Male,DALY rate,239.9,Yes,R
2016,Other mental health disorders,NHS Grampian,15 to 24,Male,DALY rate,188.6,Yes,R
2016,Other mental health disorders,NHS Grampian,25 to 44,Male,DALY rate,151.1,Yes,R
2016,Other mental health disorders,NHS Grampian,45 to 64,Male,DALY rate,136.2,Yes,R
2016,Other mental health disorders,NHS Grampian,65 to 84,Male,DALY rate,119.2,Yes,R
2016,Other mental health disorders,NHS Grampian,85 and over,Male,DALY rate,441.6,Yes,R
2016,Other mental health disorders,NHS Grampian,Under 15,Female,DALY rate,82.5,Yes,R
2016,Other mental health disorders,NHS Grampian,15 to 24,Female,DALY rate,185.1,Yes,R
2016,Other mental health disorders,NHS Grampian,25 to 44,Female,DALY rate,275.1,Yes,R
2016,Other mental health disorders,NHS Grampian,45 to 64,Female,DALY rate,147.7,Yes,R
2016,Other mental health disorders,NHS Grampian,65 to 84,Female,DALY rate,125.2,Yes,R
2016,Other mental health disorders,NHS Grampian,85 and over,Female,DALY rate,412.4,Yes,R
2016,Other mental health disorders,NHS Grampian,Under 15,Both sexes,DALY rate,163.1,Yes,R
2016,Other mental health disorders,NHS Grampian,15 to 24,Both sexes,DALY rate,187.1,Yes,R
2016,Other mental health disorders,NHS Grampian,25 to 44,Both sexes,DALY rate,211.7,Yes,R
2016,Other mental health disorders,NHS Grampian,45 to 64,Both sexes,DALY rate,142,Yes,R
2016,Other mental health disorders,NHS Grampian,65 to 84,Both sexes,DALY rate,122.2,Yes,R
2016,Other mental health disorders,NHS Grampian,85 and over,Both sexes,DALY rate,422.8,Yes,R
2016,Diabetes mellitus,NHS Grampian,Under 15,Male,DALY rate,18.2,Yes,G
2016,Diabetes mellitus,NHS Grampian,15 to 24,Male,DALY rate,59.5,Yes,G
2016,Diabetes mellitus,NHS Grampian,25 to 44,Male,DALY rate,143,Yes,G
2016,Diabetes mellitus,NHS Grampian,45 to 64,Male,DALY rate,"1,105.50",No,G
2016,Diabetes mellitus,NHS Grampian,65 to 84,Male,DALY rate,"2,314.00",No,G
2016,Diabetes mellitus,NHS Grampian,85 and over,Male,DALY rate,"3,290.10",No,G
2016,Diabetes mellitus,NHS Grampian,Under 15,Female,DALY rate,19.6,Yes,G
2016,Diabetes mellitus,NHS Grampian,15 to 24,Female,DALY rate,53.6,Yes,G
2016,Diabetes mellitus,NHS Grampian,25 to 44,Female,DALY rate,133.1,Yes,G
2016,Diabetes mellitus,NHS Grampian,45 to 64,Female,DALY rate,640.9,No,G
2016,Diabetes mellitus,NHS Grampian,65 to 84,Female,DALY rate,"1,682.70",No,G
2016,Diabetes mellitus,NHS Grampian,85 and over,Female,DALY rate,"2,197.00",No,G
2016,Diabetes mellitus,NHS Grampian,Under 15,Both sexes,DALY rate,18.9,Yes,G
2016,Diabetes mellitus,NHS Grampian,15 to 24,Both sexes,DALY rate,56.6,Yes,G
2016,Diabetes mellitus,NHS Grampian,25 to 44,Both sexes,DALY rate,138.2,Yes,G
2016,Diabetes mellitus,NHS Grampian,45 to 64,Both sexes,DALY rate,871.7,No,G
2016,Diabetes mellitus,NHS Grampian,65 to 84,Both sexes,DALY rate,"1,985.10",No,G
2016,Diabetes mellitus,NHS Grampian,85 and over,Both sexes,DALY rate,"2,572.30",No,G
2016,Chronic kidney disease,NHS Grampian,Under 15,Male,DALY rate,0,Yes,A
2016,Chronic kidney disease,NHS Grampian,15 to 24,Male,DALY rate,1.1,Yes,A
2016,Chronic kidney disease,NHS Grampian,25 to 44,Male,DALY rate,7.2,Yes,A
2016,Chronic kidney disease,NHS Grampian,45 to 64,Male,DALY rate,228.1,Yes,A
2016,Chronic kidney disease,NHS Grampian,65 to 84,Male,DALY rate,"1,121.80",No,A
2016,Chronic kidney disease,NHS Grampian,85 and over,Male,DALY rate,"5,625.80",No,A
2016,Chronic kidney disease,NHS Grampian,Under 15,Female,DALY rate,1,Yes,A
2016,Chronic kidney disease,NHS Grampian,15 to 24,Female,DALY rate,1.4,Yes,A
2016,Chronic kidney disease,NHS Grampian,25 to 44,Female,DALY rate,7.8,Yes,A
2016,Chronic kidney disease,NHS Grampian,45 to 64,Female,DALY rate,238.2,Yes,A
2016,Chronic kidney disease,NHS Grampian,65 to 84,Female,DALY rate,"1,224.40",No,A
2016,Chronic kidney disease,NHS Grampian,85 and over,Female,DALY rate,"4,097.80",No,A
2016,Chronic kidney disease,NHS Grampian,Under 15,Both sexes,DALY rate,0.5,Yes,A
2016,Chronic kidney disease,NHS Grampian,15 to 24,Both sexes,DALY rate,1.3,Yes,A
2016,Chronic kidney disease,NHS Grampian,25 to 44,Both sexes,DALY rate,7.5,Yes,A
2016,Chronic kidney disease,NHS Grampian,45 to 64,Both sexes,DALY rate,233.7,No,A
2016,Chronic kidney disease,NHS Grampian,65 to 84,Both sexes,DALY rate,"1,189.20",No,A
2016,Chronic kidney disease,NHS Grampian,85 and over,Both sexes,DALY rate,"4,564.50",No,A
2016,Other diabetes and chronic kidney disorders,NHS Grampian,Under 15,Male,DALY rate,0,Yes,R
2016,Other diabetes and chronic kidney disorders,NHS Grampian,15 to 24,Male,DALY rate,0,Yes,R
2016,Other diabetes and chronic kidney disorders,NHS Grampian,25 to 44,Male,DALY rate,0,Yes,R
2016,Other diabetes and chronic kidney disorders,NHS Grampian,45 to 64,Male,DALY rate,0,Yes,R
2016,Other diabetes and chronic kidney disorders,NHS Grampian,65 to 84,Male,DALY rate,55.2,Yes,R
2016,Other diabetes and chronic kidney disorders,NHS Grampian,85 and over,Male,DALY rate,0,Yes,R
2016,Other diabetes and chronic kidney disorders,NHS Grampian,Under 15,Female,DALY rate,0,Yes,R
2016,Other diabetes and chronic kidney disorders,NHS Grampian,15 to 24,Female,DALY rate,0,Yes,R
2016,Other diabetes and chronic kidney disorders,NHS Grampian,25 to 44,Female,DALY rate,0,Yes,R
2016,Other diabetes and chronic kidney disorders,NHS Grampian,45 to 64,Female,DALY rate,0,Yes,R
2016,Other diabetes and chronic kidney disorders,NHS Grampian,65 to 84,Female,DALY rate,0,Yes,R
2016,Other diabetes and chronic kidney disorders,NHS Grampian,85 and over,Female,DALY rate,0,Yes,R
2016,Other diabetes and chronic kidney disorders,NHS Grampian,Under 15,Both sexes,DALY rate,0,Yes,R
2016,Other diabetes and chronic kidney disorders,NHS Grampian,15 to 24,Both sexes,DALY rate,0,Yes,R
2016,Other diabetes and chronic kidney disorders,NHS Grampian,25 to 44,Both sexes,DALY rate,0,Yes,R
2016,Other diabetes and chronic kidney disorders,NHS Grampian,45 to 64,Both sexes,DALY rate,0,Yes,R
2016,Other diabetes and chronic kidney disorders,NHS Grampian,65 to 84,Both sexes,DALY rate,26.1,Yes,R
2016,Other diabetes and chronic kidney disorders,NHS Grampian,85 and over,Both sexes,DALY rate,0,Yes,R
2016,Rheumatoid arthritis,NHS Grampian,Under 15,Male,DALY rate,0.4,Yes,A
2016,Rheumatoid arthritis,NHS Grampian,15 to 24,Male,DALY rate,15,Yes,A
2016,Rheumatoid arthritis,NHS Grampian,25 to 44,Male,DALY rate,52.7,Yes,A
2016,Rheumatoid arthritis,NHS Grampian,45 to 64,Male,DALY rate,150.1,Yes,A
2016,Rheumatoid arthritis,NHS Grampian,65 to 84,Male,DALY rate,310.8,Yes,A
2016,Rheumatoid arthritis,NHS Grampian,85 and over,Male,DALY rate,904.8,Yes,A
2016,Rheumatoid arthritis,NHS Grampian,Under 15,Female,DALY rate,6.8,Yes,A
2016,Rheumatoid arthritis,NHS Grampian,15 to 24,Female,DALY rate,47.1,Yes,A
2016,Rheumatoid arthritis,NHS Grampian,25 to 44,Female,DALY rate,128.1,Yes,A
2016,Rheumatoid arthritis,NHS Grampian,45 to 64,Female,DALY rate,386.9,Yes,A
2016,Rheumatoid arthritis,NHS Grampian,65 to 84,Female,DALY rate,578.7,No,A
2016,Rheumatoid arthritis,NHS Grampian,85 and over,Female,DALY rate,502.1,Yes,A
2016,Rheumatoid arthritis,NHS Grampian,Under 15,Both sexes,DALY rate,3.5,Yes,A
2016,Rheumatoid arthritis,NHS Grampian,15 to 24,Both sexes,DALY rate,30.9,Yes,A
2016,Rheumatoid arthritis,NHS Grampian,25 to 44,Both sexes,DALY rate,89.9,Yes,A
2016,Rheumatoid arthritis,NHS Grampian,45 to 64,Both sexes,DALY rate,269,Yes,A
2016,Rheumatoid arthritis,NHS Grampian,65 to 84,Both sexes,DALY rate,457.2,No,A
2016,Rheumatoid arthritis,NHS Grampian,85 and over,Both sexes,DALY rate,644.4,No,A
2016,Osteoarthritis,NHS Grampian,Under 15,Male,DALY rate,0.8,Yes,A
2016,Osteoarthritis,NHS Grampian,15 to 24,Male,DALY rate,1.2,Yes,A
2016,Osteoarthritis,NHS Grampian,25 to 44,Male,DALY rate,56.4,Yes,A
2016,Osteoarthritis,NHS Grampian,45 to 64,Male,DALY rate,485.4,Yes,A
2016,Osteoarthritis,NHS Grampian,65 to 84,Male,DALY rate,879.6,Yes,A
2016,Osteoarthritis,NHS Grampian,85 and over,Male,DALY rate,546.6,Yes,A
2016,Osteoarthritis,NHS Grampian,Under 15,Female,DALY rate,0,Yes,A
2016,Osteoarthritis,NHS Grampian,15 to 24,Female,DALY rate,2.4,Yes,A
2016,Osteoarthritis,NHS Grampian,25 to 44,Female,DALY rate,70.4,Yes,A
2016,Osteoarthritis,NHS Grampian,45 to 64,Female,DALY rate,713.8,Yes,A
2016,Osteoarthritis,NHS Grampian,65 to 84,Female,DALY rate,"1,240.30",Yes,A
2016,Osteoarthritis,NHS Grampian,85 and over,Female,DALY rate,761.4,Yes,A
2016,Osteoarthritis,NHS Grampian,Under 15,Both sexes,DALY rate,0.4,Yes,A
2016,Osteoarthritis,NHS Grampian,15 to 24,Both sexes,DALY rate,1.8,Yes,A
2016,Osteoarthritis,NHS Grampian,25 to 44,Both sexes,DALY rate,63.3,Yes,A
2016,Osteoarthritis,NHS Grampian,45 to 64,Both sexes,DALY rate,600.2,Yes,A
2016,Osteoarthritis,NHS Grampian,65 to 84,Both sexes,DALY rate,"1,072.70",Yes,A
2016,Osteoarthritis,NHS Grampian,85 and over,Both sexes,DALY rate,686.3,Yes,A
2016,Low back and neck pain,NHS Grampian,Under 15,Male,DALY rate,155.2,Yes,A
2016,Low back and neck pain,NHS Grampian,15 to 24,Male,DALY rate,623.9,Yes,A
2016,Low back and neck pain,NHS Grampian,25 to 44,Male,DALY rate,"1,125.50",Yes,A
2016,Low back and neck pain,NHS Grampian,45 to 64,Male,DALY rate,"1,355.60",Yes,A
2016,Low back and neck pain,NHS Grampian,65 to 84,Male,DALY rate,"1,399.70",Yes,A
2016,Low back and neck pain,NHS Grampian,85 and over,Male,DALY rate,"1,461.60",Yes,A
2016,Low back and neck pain,NHS Grampian,Under 15,Female,DALY rate,188.9,Yes,A
2016,Low back and neck pain,NHS Grampian,15 to 24,Female,DALY rate,955.9,Yes,A
2016,Low back and neck pain,NHS Grampian,25 to 44,Female,DALY rate,"1,633.80",Yes,A
2016,Low back and neck pain,NHS Grampian,45 to 64,Female,DALY rate,"1,732.80",Yes,A
2016,Low back and neck pain,NHS Grampian,65 to 84,Female,DALY rate,"1,741.20",Yes,A
2016,Low back and neck pain,NHS Grampian,85 and over,Female,DALY rate,"1,664.80",Yes,A
2016,Low back and neck pain,NHS Grampian,Under 15,Both sexes,DALY rate,171.6,Yes,A
2016,Low back and neck pain,NHS Grampian,15 to 24,Both sexes,DALY rate,787.8,Yes,A
2016,Low back and neck pain,NHS Grampian,25 to 44,Both sexes,DALY rate,"1,374.80",Yes,A
2016,Low back and neck pain,NHS Grampian,45 to 64,Both sexes,DALY rate,"1,545.60",Yes,A
2016,Low back and neck pain,NHS Grampian,65 to 84,Both sexes,DALY rate,"1,582.30",Yes,A
2016,Low back and neck pain,NHS Grampian,85 and over,Both sexes,DALY rate,"1,591.50",Yes,A
2016,Other musculoskeletal disorders,NHS Grampian,Under 15,Male,DALY rate,91.8,Yes,R
2016,Other musculoskeletal disorders,NHS Grampian,15 to 24,Male,DALY rate,303.5,Yes,R
2016,Other musculoskeletal disorders,NHS Grampian,25 to 44,Male,DALY rate,312.4,Yes,R
2016,Other musculoskeletal disorders,NHS Grampian,45 to 64,Male,DALY rate,534.3,Yes,R
2016,Other musculoskeletal disorders,NHS Grampian,65 to 84,Male,DALY rate,493.9,Yes,R
2016,Other musculoskeletal disorders,NHS Grampian,85 and over,Male,DALY rate,635.4,Yes,R
2016,Other musculoskeletal disorders,NHS Grampian,Under 15,Female,DALY rate,86.5,Yes,R
2016,Other musculoskeletal disorders,NHS Grampian,15 to 24,Female,DALY rate,269,Yes,R
2016,Other musculoskeletal disorders,NHS Grampian,25 to 44,Female,DALY rate,387.7,Yes,R
2016,Other musculoskeletal disorders,NHS Grampian,45 to 64,Female,DALY rate,586.5,Yes,R
2016,Other musculoskeletal disorders,NHS Grampian,65 to 84,Female,DALY rate,706.6,No,R
2016,Other musculoskeletal disorders,NHS Grampian,85 and over,Female,DALY rate,"1,739.10",No,R
2016,Other musculoskeletal disorders,NHS Grampian,Under 15,Both sexes,DALY rate,89.2,Yes,R
2016,Other musculoskeletal disorders,NHS Grampian,15 to 24,Both sexes,DALY rate,286.9,Yes,R
2016,Other musculoskeletal disorders,NHS Grampian,25 to 44,Both sexes,DALY rate,349.3,Yes,R
2016,Other musculoskeletal disorders,NHS Grampian,45 to 64,Both sexes,DALY rate,560.9,Yes,R
2016,Other musculoskeletal disorders,NHS Grampian,65 to 84,Both sexes,DALY rate,613.5,No,R
2016,Other musculoskeletal disorders,NHS Grampian,85 and over,Both sexes,DALY rate,"1,359.40",No,R
2016,Congenital birth defects,NHS Grampian,Under 15,Male,DALY rate,815,Yes,A
2016,Congenital birth defects,NHS Grampian,15 to 24,Male,DALY rate,560.4,Yes,A
2016,Congenital birth defects,NHS Grampian,25 to 44,Male,DALY rate,200.6,Yes,A
2016,Congenital birth defects,NHS Grampian,45 to 64,Male,DALY rate,119.1,Yes,A
2016,Congenital birth defects,NHS Grampian,65 to 84,Male,DALY rate,75.8,Yes,A
2016,Congenital birth defects,NHS Grampian,85 and over,Male,DALY rate,80.6,Yes,A
2016,Congenital birth defects,NHS Grampian,Under 15,Female,DALY rate,686.5,Yes,A
2016,Congenital birth defects,NHS Grampian,15 to 24,Female,DALY rate,191.3,Yes,A
2016,Congenital birth defects,NHS Grampian,25 to 44,Female,DALY rate,82.5,Yes,A
2016,Congenital birth defects,NHS Grampian,45 to 64,Female,DALY rate,105.9,Yes,A
2016,Congenital birth defects,NHS Grampian,65 to 84,Female,DALY rate,93.6,Yes,A
2016,Congenital birth defects,NHS Grampian,85 and over,Female,DALY rate,37.8,Yes,A
2016,Congenital birth defects,NHS Grampian,Under 15,Both sexes,DALY rate,752.4,No,A
2016,Congenital birth defects,NHS Grampian,15 to 24,Both sexes,DALY rate,380.3,Yes,A
2016,Congenital birth defects,NHS Grampian,25 to 44,Both sexes,DALY rate,143.7,Yes,A
2016,Congenital birth defects,NHS Grampian,45 to 64,Both sexes,DALY rate,112.5,Yes,A
2016,Congenital birth defects,NHS Grampian,65 to 84,Both sexes,DALY rate,84,Yes,A
2016,Congenital birth defects,NHS Grampian,85 and over,Both sexes,DALY rate,51.2,Yes,A
2016,Urinary diseases and male infertility,NHS Grampian,Under 15,Male,DALY rate,0.2,Yes,A
2016,Urinary diseases and male infertility,NHS Grampian,15 to 24,Male,DALY rate,1.6,Yes,A
2016,Urinary diseases and male infertility,NHS Grampian,25 to 44,Male,DALY rate,17,Yes,A
2016,Urinary diseases and male infertility,NHS Grampian,45 to 64,Male,DALY rate,214,Yes,A
2016,Urinary diseases and male infertility,NHS Grampian,65 to 84,Male,DALY rate,999.3,No,A
2016,Urinary diseases and male infertility,NHS Grampian,85 and over,Male,DALY rate,"2,423.60",No,A
2016,Urinary diseases and male infertility,NHS Grampian,Under 15,Female,DALY rate,0.8,Yes,A
2016,Urinary diseases and male infertility,NHS Grampian,15 to 24,Female,DALY rate,2.3,Yes,A
2016,Urinary diseases and male infertility,NHS Grampian,25 to 44,Female,DALY rate,71.6,Yes,A
2016,Urinary diseases and male infertility,NHS Grampian,45 to 64,Female,DALY rate,42.1,Yes,A
2016,Urinary diseases and male infertility,NHS Grampian,65 to 84,Female,DALY rate,404,No,A
2016,Urinary diseases and male infertility,NHS Grampian,85 and over,Female,DALY rate,"1,485.40",No,A
2016,Urinary diseases and male infertility,NHS Grampian,Under 15,Both sexes,DALY rate,0.5,Yes,A
2016,Urinary diseases and male infertility,NHS Grampian,15 to 24,Both sexes,DALY rate,1.9,Yes,A
2016,Urinary diseases and male infertility,NHS Grampian,25 to 44,Both sexes,DALY rate,44.3,Yes,A
2016,Urinary diseases and male infertility,NHS Grampian,45 to 64,Both sexes,DALY rate,127.6,Yes,A
2016,Urinary diseases and male infertility,NHS Grampian,65 to 84,Both sexes,DALY rate,677.9,No,A
2016,Urinary diseases and male infertility,NHS Grampian,85 and over,Both sexes,DALY rate,"1,786.80",No,A
2016,Oral disorders,NHS Grampian,Under 15,Male,DALY rate,16,Yes,A
2016,Oral disorders,NHS Grampian,15 to 24,Male,DALY rate,38.5,Yes,A
2016,Oral disorders,NHS Grampian,25 to 44,Male,DALY rate,59.4,Yes,A
2016,Oral disorders,NHS Grampian,45 to 64,Male,DALY rate,167.2,Yes,A
2016,Oral disorders,NHS Grampian,65 to 84,Male,DALY rate,500.8,Yes,A
2016,Oral disorders,NHS Grampian,85 and over,Male,DALY rate,746.4,Yes,A
2016,Oral disorders,NHS Grampian,Under 15,Female,DALY rate,16.2,Yes,A
2016,Oral disorders,NHS Grampian,15 to 24,Female,DALY rate,53.6,Yes,A
2016,Oral disorders,NHS Grampian,25 to 44,Female,DALY rate,79.6,Yes,A
2016,Oral disorders,NHS Grampian,45 to 64,Female,DALY rate,191.8,Yes,A
2016,Oral disorders,NHS Grampian,65 to 84,Female,DALY rate,580,Yes,A
2016,Oral disorders,NHS Grampian,85 and over,Female,DALY rate,"1,157.70",Yes,A
2016,Oral disorders,NHS Grampian,Under 15,Both sexes,DALY rate,16.1,Yes,A
2016,Oral disorders,NHS Grampian,15 to 24,Both sexes,DALY rate,45.9,Yes,A
2016,Oral disorders,NHS Grampian,25 to 44,Both sexes,DALY rate,69.2,Yes,A
2016,Oral disorders,NHS Grampian,45 to 64,Both sexes,DALY rate,179.5,Yes,A
2016,Oral disorders,NHS Grampian,65 to 84,Both sexes,DALY rate,544.5,Yes,A
2016,Oral disorders,NHS Grampian,85 and over,Both sexes,DALY rate,"1,015.90",Yes,A
2016,Sudden infant death syndrome,NHS Grampian,Under 15,Male,DALY rate,0,Yes,G
2016,Sudden infant death syndrome,NHS Grampian,15 to 24,Male,DALY rate,0,Yes,G
2016,Sudden infant death syndrome,NHS Grampian,25 to 44,Male,DALY rate,0,Yes,G
2016,Sudden infant death syndrome,NHS Grampian,45 to 64,Male,DALY rate,0,Yes,G
2016,Sudden infant death syndrome,NHS Grampian,65 to 84,Male,DALY rate,0,Yes,G
2016,Sudden infant death syndrome,NHS Grampian,85 and over,Male,DALY rate,0,Yes,G
2016,Sudden infant death syndrome,NHS Grampian,Under 15,Female,DALY rate,0,Yes,G
2016,Sudden infant death syndrome,NHS Grampian,15 to 24,Female,DALY rate,0,Yes,G
2016,Sudden infant death syndrome,NHS Grampian,25 to 44,Female,DALY rate,0,Yes,G
2016,Sudden infant death syndrome,NHS Grampian,45 to 64,Female,DALY rate,0,Yes,G
2016,Sudden infant death syndrome,NHS Grampian,65 to 84,Female,DALY rate,0,Yes,G
2016,Sudden infant death syndrome,NHS Grampian,85 and over,Female,DALY rate,0,Yes,G
2016,Sudden infant death syndrome,NHS Grampian,Under 15,Both sexes,DALY rate,0,Yes,G
2016,Sudden infant death syndrome,NHS Grampian,15 to 24,Both sexes,DALY rate,0,Yes,G
2016,Sudden infant death syndrome,NHS Grampian,25 to 44,Both sexes,DALY rate,0,Yes,G
2016,Sudden infant death syndrome,NHS Grampian,45 to 64,Both sexes,DALY rate,0,Yes,G
2016,Sudden infant death syndrome,NHS Grampian,65 to 84,Both sexes,DALY rate,0,Yes,G
2016,Sudden infant death syndrome,NHS Grampian,85 and over,Both sexes,DALY rate,0,Yes,G
2016,Gynecological diseases,NHS Grampian,Under 15,Male,DALY rate,1,Yes,R
2016,Gynecological diseases,NHS Grampian,15 to 24,Male,DALY rate,1.1,Yes,R
2016,Gynecological diseases,NHS Grampian,25 to 44,Male,DALY rate,0.9,Yes,R
2016,Gynecological diseases,NHS Grampian,45 to 64,Male,DALY rate,0.8,Yes,R
2016,Gynecological diseases,NHS Grampian,65 to 84,Male,DALY rate,1.1,Yes,R
2016,Gynecological diseases,NHS Grampian,85 and over,Male,DALY rate,0.8,Yes,R
2016,Gynecological diseases,NHS Grampian,Under 15,Female,DALY rate,17.8,Yes,R
2016,Gynecological diseases,NHS Grampian,15 to 24,Female,DALY rate,424.5,Yes,R
2016,Gynecological diseases,NHS Grampian,25 to 44,Female,DALY rate,674.8,Yes,R
2016,Gynecological diseases,NHS Grampian,45 to 64,Female,DALY rate,448.2,Yes,R
2016,Gynecological diseases,NHS Grampian,65 to 84,Female,DALY rate,81.4,Yes,R
2016,Gynecological diseases,NHS Grampian,85 and over,Female,DALY rate,162.6,Yes,R
2016,Gynecological diseases,NHS Grampian,Under 15,Both sexes,DALY rate,9.2,Yes,R
2016,Gynecological diseases,NHS Grampian,15 to 24,Both sexes,DALY rate,210.7,Yes,R
2016,Gynecological diseases,NHS Grampian,25 to 44,Both sexes,DALY rate,331.2,Yes,R
2016,Gynecological diseases,NHS Grampian,45 to 64,Both sexes,DALY rate,226.5,Yes,R
2016,Gynecological diseases,NHS Grampian,65 to 84,Both sexes,DALY rate,43.6,Yes,R
2016,Gynecological diseases,NHS Grampian,85 and over,Both sexes,DALY rate,103.9,Yes,R
2016,"Endocrine, metabolic, blood, and immune disorders",NHS Grampian,Under 15,Male,DALY rate,200.6,Yes,R
2016,"Endocrine, metabolic, blood, and immune disorders",NHS Grampian,15 to 24,Male,DALY rate,18.7,Yes,R
2016,"Endocrine, metabolic, blood, and immune disorders",NHS Grampian,25 to 44,Male,DALY rate,166.7,Yes,R
2016,"Endocrine, metabolic, blood, and immune disorders",NHS Grampian,45 to 64,Male,DALY rate,385.8,No,R
2016,"Endocrine, metabolic, blood, and immune disorders",NHS Grampian,65 to 84,Male,DALY rate,663.2,No,R
2016,"Endocrine, metabolic, blood, and immune disorders",NHS Grampian,85 and over,Male,DALY rate,832.4,Yes,R
2016,"Endocrine, metabolic, blood, and immune disorders",NHS Grampian,Under 15,Female,DALY rate,39.1,Yes,R
2016,"Endocrine, metabolic, blood, and immune disorders",NHS Grampian,15 to 24,Female,DALY rate,29.9,Yes,R
2016,"Endocrine, metabolic, blood, and immune disorders",NHS Grampian,25 to 44,Female,DALY rate,84.7,Yes,R
2016,"Endocrine, metabolic, blood, and immune disorders",NHS Grampian,45 to 64,Female,DALY rate,183.5,Yes,R
2016,"Endocrine, metabolic, blood, and immune disorders",NHS Grampian,65 to 84,Female,DALY rate,719.9,No,R
2016,"Endocrine, metabolic, blood, and immune disorders",NHS Grampian,85 and over,Female,DALY rate,"1,755.30",No,R
2016,"Endocrine, metabolic, blood, and immune disorders",NHS Grampian,Under 15,Both sexes,DALY rate,121.8,Yes,R
2016,"Endocrine, metabolic, blood, and immune disorders",NHS Grampian,15 to 24,Both sexes,DALY rate,24.2,Yes,R
2016,"Endocrine, metabolic, blood, and immune disorders",NHS Grampian,25 to 44,Both sexes,DALY rate,126.4,Yes,R
2016,"Endocrine, metabolic, blood, and immune disorders",NHS Grampian,45 to 64,Both sexes,DALY rate,284.3,No,R
2016,"Endocrine, metabolic, blood, and immune disorders",NHS Grampian,65 to 84,Both sexes,DALY rate,695.3,No,R
2016,"Endocrine, metabolic, blood, and immune disorders",NHS Grampian,85 and over,Both sexes,DALY rate,"1,410.30",No,R
2016,Transport injuries,NHS Grampian,Under 15,Male,DALY rate,9.5,Yes,G
2016,Transport injuries,NHS Grampian,15 to 24,Male,DALY rate,"1,422.50",No,G
2016,Transport injuries,NHS Grampian,25 to 44,Male,DALY rate,388.6,No,G
2016,Transport injuries,NHS Grampian,45 to 64,Male,DALY rate,441.4,No,G
2016,Transport injuries,NHS Grampian,65 to 84,Male,DALY rate,116.2,Yes,G
2016,Transport injuries,NHS Grampian,85 and over,Male,DALY rate,242.1,Yes,G
2016,Transport injuries,NHS Grampian,Under 15,Female,DALY rate,404.8,Yes,G
2016,Transport injuries,NHS Grampian,15 to 24,Female,DALY rate,24.5,Yes,G
2016,Transport injuries,NHS Grampian,25 to 44,Female,DALY rate,49.2,Yes,G
2016,Transport injuries,NHS Grampian,45 to 64,Female,DALY rate,112.2,Yes,G
2016,Transport injuries,NHS Grampian,65 to 84,Female,DALY rate,21.3,Yes,G
2016,Transport injuries,NHS Grampian,85 and over,Female,DALY rate,153.1,Yes,G
2016,Transport injuries,NHS Grampian,Under 15,Both sexes,DALY rate,202.7,Yes,G
2016,Transport injuries,NHS Grampian,15 to 24,Both sexes,DALY rate,733.5,No,G
2016,Transport injuries,NHS Grampian,25 to 44,Both sexes,DALY rate,222.6,No,G
2016,Transport injuries,NHS Grampian,45 to 64,Both sexes,DALY rate,276.5,No,G
2016,Transport injuries,NHS Grampian,65 to 84,Both sexes,DALY rate,63.4,Yes,G
2016,Transport injuries,NHS Grampian,85 and over,Both sexes,DALY rate,185.6,Yes,G
2016,Falls,NHS Grampian,Under 15,Male,DALY rate,258,Yes,G
2016,Falls,NHS Grampian,15 to 24,Male,DALY rate,120.6,Yes,G
2016,Falls,NHS Grampian,25 to 44,Male,DALY rate,224.8,Yes,G
2016,Falls,NHS Grampian,45 to 64,Male,DALY rate,209.2,Yes,G
2016,Falls,NHS Grampian,65 to 84,Male,DALY rate,999.9,No,G
2016,Falls,NHS Grampian,85 and over,Male,DALY rate,"4,586.60",No,G
2016,Falls,NHS Grampian,Under 15,Female,DALY rate,60,Yes,G
2016,Falls,NHS Grampian,15 to 24,Female,DALY rate,70,Yes,G
2016,Falls,NHS Grampian,25 to 44,Female,DALY rate,45.3,Yes,G
2016,Falls,NHS Grampian,45 to 64,Female,DALY rate,77.5,Yes,G
2016,Falls,NHS Grampian,65 to 84,Female,DALY rate,672.8,No,G
2016,Falls,NHS Grampian,85 and over,Female,DALY rate,"4,513.80",No,G
2016,Falls,NHS Grampian,Under 15,Both sexes,DALY rate,161.3,Yes,G
2016,Falls,NHS Grampian,15 to 24,Both sexes,DALY rate,95.6,Yes,G
2016,Falls,NHS Grampian,25 to 44,Both sexes,DALY rate,136.2,Yes,G
2016,Falls,NHS Grampian,45 to 64,Both sexes,DALY rate,142.8,Yes,G
2016,Falls,NHS Grampian,65 to 84,Both sexes,DALY rate,819.1,No,G
2016,Falls,NHS Grampian,85 and over,Both sexes,DALY rate,"4,528.20",No,G
2016,Other unintentional injuries,NHS Grampian,Under 15,Male,DALY rate,211.4,Yes,A
2016,Other unintentional injuries,NHS Grampian,15 to 24,Male,DALY rate,98.4,Yes,A
2016,Other unintentional injuries,NHS Grampian,25 to 44,Male,DALY rate,402.2,Yes,A
2016,Other unintentional injuries,NHS Grampian,45 to 64,Male,DALY rate,302.3,Yes,A
2016,Other unintentional injuries,NHS Grampian,65 to 84,Male,DALY rate,350.9,No,A
2016,Other unintentional injuries,NHS Grampian,85 and over,Male,DALY rate,872.4,Yes,A
2016,Other unintentional injuries,NHS Grampian,Under 15,Female,DALY rate,218.2,Yes,A
2016,Other unintentional injuries,NHS Grampian,15 to 24,Female,DALY rate,45.9,Yes,A
2016,Other unintentional injuries,NHS Grampian,25 to 44,Female,DALY rate,119.2,Yes,A
2016,Other unintentional injuries,NHS Grampian,45 to 64,Female,DALY rate,171.6,Yes,A
2016,Other unintentional injuries,NHS Grampian,65 to 84,Female,DALY rate,191.5,Yes,A
2016,Other unintentional injuries,NHS Grampian,85 and over,Female,DALY rate,360.8,Yes,A
2016,Other unintentional injuries,NHS Grampian,Under 15,Both sexes,DALY rate,214.7,Yes,A
2016,Other unintentional injuries,NHS Grampian,15 to 24,Both sexes,DALY rate,72.5,Yes,A
2016,Other unintentional injuries,NHS Grampian,25 to 44,Both sexes,DALY rate,261.8,No,A
2016,Other unintentional injuries,NHS Grampian,45 to 64,Both sexes,DALY rate,236.7,No,A
2016,Other unintentional injuries,NHS Grampian,65 to 84,Both sexes,DALY rate,267.7,No,A
2016,Other unintentional injuries,NHS Grampian,85 and over,Both sexes,DALY rate,527,No,A
2016,Self-harm and interpersonal violence,NHS Grampian,Under 15,Male,DALY rate,1.4,Yes,G
2016,Self-harm and interpersonal violence,NHS Grampian,15 to 24,Male,DALY rate,602,Yes,G
2016,Self-harm and interpersonal violence,NHS Grampian,25 to 44,Male,DALY rate,"1,919.10",No,G
2016,Self-harm and interpersonal violence,NHS Grampian,45 to 64,Male,DALY rate,"1,012.40",No,G
2016,Self-harm and interpersonal violence,NHS Grampian,65 to 84,Male,DALY rate,454.1,No,G
2016,Self-harm and interpersonal violence,NHS Grampian,85 and over,Male,DALY rate,237.9,Yes,G
2016,Self-harm and interpersonal violence,NHS Grampian,Under 15,Female,DALY rate,19.5,Yes,G
2016,Self-harm and interpersonal violence,NHS Grampian,15 to 24,Female,DALY rate,241.3,Yes,G
2016,Self-harm and interpersonal violence,NHS Grampian,25 to 44,Female,DALY rate,583.5,No,G
2016,Self-harm and interpersonal violence,NHS Grampian,45 to 64,Female,DALY rate,243.9,No,G
2016,Self-harm and interpersonal violence,NHS Grampian,65 to 84,Female,DALY rate,182.5,Yes,G
2016,Self-harm and interpersonal violence,NHS Grampian,85 and over,Female,DALY rate,296.9,Yes,G
2016,Self-harm and interpersonal violence,NHS Grampian,Under 15,Both sexes,DALY rate,10.2,Yes,G
2016,Self-harm and interpersonal violence,NHS Grampian,15 to 24,Both sexes,DALY rate,422.5,Yes,G
2016,Self-harm and interpersonal violence,NHS Grampian,25 to 44,Both sexes,DALY rate,"1,269.90",No,G
2016,Self-harm and interpersonal violence,NHS Grampian,45 to 64,Both sexes,DALY rate,624.9,No,G
2016,Self-harm and interpersonal violence,NHS Grampian,65 to 84,Both sexes,DALY rate,311.1,No,G
2016,Self-harm and interpersonal violence,NHS Grampian,85 and over,Both sexes,DALY rate,261.4,Yes,G
2016,Unknown cause of injury,NHS Grampian,Under 15,Male,DALY rate,34.6,Yes,A
2016,Unknown cause of injury,NHS Grampian,15 to 24,Male,DALY rate,43.4,Yes,A
2016,Unknown cause of injury,NHS Grampian,25 to 44,Male,DALY rate,64.7,Yes,A
2016,Unknown cause of injury,NHS Grampian,45 to 64,Male,DALY rate,60.9,Yes,A
2016,Unknown cause of injury,NHS Grampian,65 to 84,Male,DALY rate,57.9,Yes,A
2016,Unknown cause of injury,NHS Grampian,85 and over,Male,DALY rate,83,Yes,A
2016,Unknown cause of injury,NHS Grampian,Under 15,Female,DALY rate,26.1,Yes,A
2016,Unknown cause of injury,NHS Grampian,15 to 24,Female,DALY rate,23.4,Yes,A
2016,Unknown cause of injury,NHS Grampian,25 to 44,Female,DALY rate,26.7,Yes,A
2016,Unknown cause of injury,NHS Grampian,45 to 64,Female,DALY rate,33.4,Yes,A
2016,Unknown cause of injury,NHS Grampian,65 to 84,Female,DALY rate,49.9,Yes,A
2016,Unknown cause of injury,NHS Grampian,85 and over,Female,DALY rate,107.5,Yes,A
2016,Unknown cause of injury,NHS Grampian,Under 15,Both sexes,DALY rate,30.4,Yes,A
2016,Unknown cause of injury,NHS Grampian,15 to 24,Both sexes,DALY rate,33.5,Yes,A
2016,Unknown cause of injury,NHS Grampian,25 to 44,Both sexes,DALY rate,46,Yes,A
2016,Unknown cause of injury,NHS Grampian,45 to 64,Both sexes,DALY rate,47,Yes,A
2016,Unknown cause of injury,NHS Grampian,65 to 84,Both sexes,DALY rate,53.8,Yes,A
2016,Unknown cause of injury,NHS Grampian,85 and over,Both sexes,DALY rate,99.2,Yes,A
2016,Blindness and vision loss,NHS Grampian,Under 15,Male,DALY rate,180.5,Yes,A
2016,Blindness and vision loss,NHS Grampian,15 to 24,Male,DALY rate,144.9,Yes,A
2016,Blindness and vision loss,NHS Grampian,25 to 44,Male,DALY rate,88.2,Yes,A
2016,Blindness and vision loss,NHS Grampian,45 to 64,Male,DALY rate,146.8,Yes,A
2016,Blindness and vision loss,NHS Grampian,65 to 84,Male,DALY rate,516.9,Yes,A
2016,Blindness and vision loss,NHS Grampian,85 and over,Male,DALY rate,"1,059.10",Yes,A
2016,Blindness and vision loss,NHS Grampian,Under 15,Female,DALY rate,191.5,Yes,A
2016,Blindness and vision loss,NHS Grampian,15 to 24,Female,DALY rate,169.2,Yes,A
2016,Blindness and vision loss,NHS Grampian,25 to 44,Female,DALY rate,133.9,Yes,A
2016,Blindness and vision loss,NHS Grampian,45 to 64,Female,DALY rate,174.8,Yes,A
2016,Blindness and vision loss,NHS Grampian,65 to 84,Female,DALY rate,585.2,Yes,A
2016,Blindness and vision loss,NHS Grampian,85 and over,Female,DALY rate,"1,113.00",Yes,A
2016,Blindness and vision loss,NHS Grampian,Under 15,Both sexes,DALY rate,185.9,Yes,A
2016,Blindness and vision loss,NHS Grampian,15 to 24,Both sexes,DALY rate,156.9,Yes,A
2016,Blindness and vision loss,NHS Grampian,25 to 44,Both sexes,DALY rate,110.6,Yes,A
2016,Blindness and vision loss,NHS Grampian,45 to 64,Both sexes,DALY rate,160.9,Yes,A
2016,Blindness and vision loss,NHS Grampian,65 to 84,Both sexes,DALY rate,554.6,Yes,A
2016,Blindness and vision loss,NHS Grampian,85 and over,Both sexes,DALY rate,"1,094.70",Yes,A
2016,Age-related and other hearing loss,NHS Grampian,Under 15,Male,DALY rate,218.6,Yes,A
2016,Age-related and other hearing loss,NHS Grampian,15 to 24,Male,DALY rate,143,Yes,A
2016,Age-related and other hearing loss,NHS Grampian,25 to 44,Male,DALY rate,208.8,Yes,A
2016,Age-related and other hearing loss,NHS Grampian,45 to 64,Male,DALY rate,380.7,Yes,A
2016,Age-related and other hearing loss,NHS Grampian,65 to 84,Male,DALY rate,698.6,Yes,A
2016,Age-related and other hearing loss,NHS Grampian,85 and over,Male,DALY rate,658.6,Yes,A
2016,Age-related and other hearing loss,NHS Grampian,Under 15,Female,DALY rate,186.5,Yes,A
2016,Age-related and other hearing loss,NHS Grampian,15 to 24,Female,DALY rate,171.2,Yes,A
2016,Age-related and other hearing loss,NHS Grampian,25 to 44,Female,DALY rate,216.8,Yes,A
2016,Age-related and other hearing loss,NHS Grampian,45 to 64,Female,DALY rate,341.8,Yes,A
2016,Age-related and other hearing loss,NHS Grampian,65 to 84,Female,DALY rate,644.8,Yes,A
2016,Age-related and other hearing loss,NHS Grampian,85 and over,Female,DALY rate,776.2,Yes,A
2016,Age-related and other hearing loss,NHS Grampian,Under 15,Both sexes,DALY rate,202.9,Yes,A
2016,Age-related and other hearing loss,NHS Grampian,15 to 24,Both sexes,DALY rate,156.9,Yes,A
2016,Age-related and other hearing loss,NHS Grampian,25 to 44,Both sexes,DALY rate,212.9,Yes,A
2016,Age-related and other hearing loss,NHS Grampian,45 to 64,Both sexes,DALY rate,361.2,Yes,A
2016,Age-related and other hearing loss,NHS Grampian,65 to 84,Both sexes,DALY rate,671.4,Yes,A
2016,Age-related and other hearing loss,NHS Grampian,85 and over,Both sexes,DALY rate,734.8,Yes,A
2016,Other sensory conditions,NHS Grampian,Under 15,Male,DALY rate,75.6,Yes,A
2016,Other sensory conditions,NHS Grampian,15 to 24,Male,DALY rate,110,Yes,A
2016,Other sensory conditions,NHS Grampian,25 to 44,Male,DALY rate,211.1,Yes,A
2016,Other sensory conditions,NHS Grampian,45 to 64,Male,DALY rate,283.4,Yes,A
2016,Other sensory conditions,NHS Grampian,65 to 84,Male,DALY rate,276.7,Yes,A
2016,Other sensory conditions,NHS Grampian,85 and over,Male,DALY rate,177.2,Yes,A
2016,Other sensory conditions,NHS Grampian,Under 15,Female,DALY rate,104.9,Yes,A
2016,Other sensory conditions,NHS Grampian,15 to 24,Female,DALY rate,219.7,Yes,A
2016,Other sensory conditions,NHS Grampian,25 to 44,Female,DALY rate,356.1,Yes,A
2016,Other sensory conditions,NHS Grampian,45 to 64,Female,DALY rate,434,Yes,A
2016,Other sensory conditions,NHS Grampian,65 to 84,Female,DALY rate,355.5,Yes,A
2016,Other sensory conditions,NHS Grampian,85 and over,Female,DALY rate,178.8,Yes,A
2016,Other sensory conditions,NHS Grampian,Under 15,Both sexes,DALY rate,89.9,Yes,A
2016,Other sensory conditions,NHS Grampian,15 to 24,Both sexes,DALY rate,163.9,Yes,A
2016,Other sensory conditions,NHS Grampian,25 to 44,Both sexes,DALY rate,282.3,Yes,A
2016,Other sensory conditions,NHS Grampian,45 to 64,Both sexes,DALY rate,359.2,Yes,A
2016,Other sensory conditions,NHS Grampian,65 to 84,Both sexes,DALY rate,318.4,Yes,A
2016,Other sensory conditions,NHS Grampian,85 and over,Both sexes,DALY rate,177.9,Yes,A
2016,Skin and subcutaneous diseases,NHS Grampian,Under 15,Male,DALY rate,407.4,Yes,A
2016,Skin and subcutaneous diseases,NHS Grampian,15 to 24,Male,DALY rate,352.8,Yes,A
2016,Skin and subcutaneous diseases,NHS Grampian,25 to 44,Male,DALY rate,213.6,Yes,A
2016,Skin and subcutaneous diseases,NHS Grampian,45 to 64,Male,DALY rate,339,Yes,A
2016,Skin and subcutaneous diseases,NHS Grampian,65 to 84,Male,DALY rate,377.3,Yes,A
2016,Skin and subcutaneous diseases,NHS Grampian,85 and over,Male,DALY rate,244.2,Yes,A
2016,Skin and subcutaneous diseases,NHS Grampian,Under 15,Female,DALY rate,438.4,Yes,A
2016,Skin and subcutaneous diseases,NHS Grampian,15 to 24,Female,DALY rate,542.4,Yes,A
2016,Skin and subcutaneous diseases,NHS Grampian,25 to 44,Female,DALY rate,349.8,Yes,A
2016,Skin and subcutaneous diseases,NHS Grampian,45 to 64,Female,DALY rate,242.3,Yes,A
2016,Skin and subcutaneous diseases,NHS Grampian,65 to 84,Female,DALY rate,348.7,Yes,A
2016,Skin and subcutaneous diseases,NHS Grampian,85 and over,Female,DALY rate,591.1,Yes,A
2016,Skin and subcutaneous diseases,NHS Grampian,Under 15,Both sexes,DALY rate,422.5,Yes,A
2016,Skin and subcutaneous diseases,NHS Grampian,15 to 24,Both sexes,DALY rate,446.3,Yes,A
2016,Skin and subcutaneous diseases,NHS Grampian,25 to 44,Both sexes,DALY rate,280.3,Yes,A
2016,Skin and subcutaneous diseases,NHS Grampian,45 to 64,Both sexes,DALY rate,289.9,Yes,A
2016,Skin and subcutaneous diseases,NHS Grampian,65 to 84,Both sexes,DALY rate,363.3,No,A
2016,Skin and subcutaneous diseases,NHS Grampian,85 and over,Both sexes,DALY rate,470.8,Yes,A
2016,All causes of disease and injury,Moray,Under 15,Male,DALY rate,"5,138.90",Yes,na
2016,All causes of disease and injury,Moray,15 to 24,Male,DALY rate,"12,836.30",No,na
2016,All causes of disease and injury,Moray,25 to 44,Male,DALY rate,"16,376.00",No,na
2016,All causes of disease and injury,Moray,45 to 64,Male,DALY rate,"25,444.40",No,na
2016,All causes of disease and injury,Moray,65 to 84,Male,DALY rate,"81,036.90",No,na
2016,All causes of disease and injury,Moray,85 and over,Male,DALY rate,"170,054.50",No,na
2016,All causes of disease and injury,Moray,Under 15,Female,DALY rate,"3,816.20",Yes,na
2016,All causes of disease and injury,Moray,15 to 24,Female,DALY rate,"8,883.20",Yes,na
2016,All causes of disease and injury,Moray,25 to 44,Female,DALY rate,"13,057.10",Yes,na
2016,All causes of disease and injury,Moray,45 to 64,Female,DALY rate,"25,894.40",No,na
2016,All causes of disease and injury,Moray,65 to 84,Female,DALY rate,"59,565.40",No,na
2016,All causes of disease and injury,Moray,85 and over,Female,DALY rate,"143,625.80",No,na
2016,All causes of disease and injury,Moray,Under 15,Both sexes,DALY rate,"4,501.50",Yes,na
2016,All causes of disease and injury,Moray,15 to 24,Both sexes,DALY rate,"11,033.50",No,na
2016,All causes of disease and injury,Moray,25 to 44,Both sexes,DALY rate,"14,746.70",No,na
2016,All causes of disease and injury,Moray,45 to 64,Both sexes,DALY rate,"25,687.40",No,na
2016,All causes of disease and injury,Moray,65 to 84,Both sexes,DALY rate,"69,264.30",No,na
2016,All causes of disease and injury,Moray,85 and over,Both sexes,DALY rate,"152,623.30",No,na
2016,HIV/AIDS and tuberculosis,Moray,Under 15,Male,DALY rate,0.8,Yes,G
2016,HIV/AIDS and tuberculosis,Moray,15 to 24,Male,DALY rate,3.6,Yes,G
2016,HIV/AIDS and tuberculosis,Moray,25 to 44,Male,DALY rate,27.8,Yes,G
2016,HIV/AIDS and tuberculosis,Moray,45 to 64,Male,DALY rate,26,Yes,G
2016,HIV/AIDS and tuberculosis,Moray,65 to 84,Male,DALY rate,5.7,Yes,G
2016,HIV/AIDS and tuberculosis,Moray,85 and over,Male,DALY rate,20.9,Yes,G
2016,HIV/AIDS and tuberculosis,Moray,Under 15,Female,DALY rate,1.2,Yes,G
2016,HIV/AIDS and tuberculosis,Moray,15 to 24,Female,DALY rate,2.8,Yes,G
2016,HIV/AIDS and tuberculosis,Moray,25 to 44,Female,DALY rate,12.7,Yes,G
2016,HIV/AIDS and tuberculosis,Moray,45 to 64,Female,DALY rate,9.4,Yes,G
2016,HIV/AIDS and tuberculosis,Moray,65 to 84,Female,DALY rate,2.3,Yes,G
2016,HIV/AIDS and tuberculosis,Moray,85 and over,Female,DALY rate,3.6,Yes,G
2016,HIV/AIDS and tuberculosis,Moray,Under 15,Both sexes,DALY rate,1,Yes,G
2016,HIV/AIDS and tuberculosis,Moray,15 to 24,Both sexes,DALY rate,3.2,Yes,G
2016,HIV/AIDS and tuberculosis,Moray,25 to 44,Both sexes,DALY rate,20.2,Yes,G
2016,HIV/AIDS and tuberculosis,Moray,45 to 64,Both sexes,DALY rate,17.6,Yes,G
2016,HIV/AIDS and tuberculosis,Moray,65 to 84,Both sexes,DALY rate,3.8,Yes,G
2016,HIV/AIDS and tuberculosis,Moray,85 and over,Both sexes,DALY rate,9.6,Yes,G
2016,Lower respiratory infections,Moray,Under 15,Male,DALY rate,30.2,Yes,G
2016,Lower respiratory infections,Moray,15 to 24,Male,DALY rate,11.8,Yes,G
2016,Lower respiratory infections,Moray,25 to 44,Male,DALY rate,14.9,Yes,G
2016,Lower respiratory infections,Moray,45 to 64,Male,DALY rate,310.3,Yes,G
2016,Lower respiratory infections,Moray,65 to 84,Male,DALY rate,"1,519.60",No,G
2016,Lower respiratory infections,Moray,85 and over,Male,DALY rate,"10,809.20",No,G
2016,Lower respiratory infections,Moray,Under 15,Female,DALY rate,24.9,Yes,G
2016,Lower respiratory infections,Moray,15 to 24,Female,DALY rate,17,Yes,G
2016,Lower respiratory infections,Moray,25 to 44,Female,DALY rate,24.8,Yes,G
2016,Lower respiratory infections,Moray,45 to 64,Female,DALY rate,534.2,Yes,G
2016,Lower respiratory infections,Moray,65 to 84,Female,DALY rate,"1,445.20",No,G
2016,Lower respiratory infections,Moray,85 and over,Female,DALY rate,"10,594.10",No,G
2016,Lower respiratory infections,Moray,Under 15,Both sexes,DALY rate,27.6,Yes,G
2016,Lower respiratory infections,Moray,15 to 24,Both sexes,DALY rate,14.2,Yes,G
2016,Lower respiratory infections,Moray,25 to 44,Both sexes,DALY rate,19.8,Yes,G
2016,Lower respiratory infections,Moray,45 to 64,Both sexes,DALY rate,424.6,Yes,G
2016,Lower respiratory infections,Moray,65 to 84,Both sexes,DALY rate,"1,508.60",No,G
2016,Lower respiratory infections,Moray,85 and over,Both sexes,DALY rate,"10,694.70",No,G
2016,Diarrhoea and other common infections,Moray,Under 15,Male,DALY rate,121,Yes,A
2016,Diarrhoea and other common infections,Moray,15 to 24,Male,DALY rate,70,Yes,A
2016,Diarrhoea and other common infections,Moray,25 to 44,Male,DALY rate,60.9,Yes,A
2016,Diarrhoea and other common infections,Moray,45 to 64,Male,DALY rate,281.4,Yes,A
2016,Diarrhoea and other common infections,Moray,65 to 84,Male,DALY rate,44.2,Yes,A
2016,Diarrhoea and other common infections,Moray,85 and over,Male,DALY rate,37.6,Yes,A
2016,Diarrhoea and other common infections,Moray,Under 15,Female,DALY rate,113,Yes,A
2016,Diarrhoea and other common infections,Moray,15 to 24,Female,DALY rate,82.9,Yes,A
2016,Diarrhoea and other common infections,Moray,25 to 44,Female,DALY rate,102.8,Yes,A
2016,Diarrhoea and other common infections,Moray,45 to 64,Female,DALY rate,62.4,Yes,A
2016,Diarrhoea and other common infections,Moray,65 to 84,Female,DALY rate,121.4,Yes,A
2016,Diarrhoea and other common infections,Moray,85 and over,Female,DALY rate,690.5,Yes,A
2016,Diarrhoea and other common infections,Moray,Under 15,Both sexes,DALY rate,117.2,Yes,A
2016,Diarrhoea and other common infections,Moray,15 to 24,Both sexes,DALY rate,75.9,Yes,A
2016,Diarrhoea and other common infections,Moray,25 to 44,Both sexes,DALY rate,82.2,Yes,A
2016,Diarrhoea and other common infections,Moray,45 to 64,Both sexes,DALY rate,169.4,Yes,A
2016,Diarrhoea and other common infections,Moray,65 to 84,Both sexes,DALY rate,85.2,Yes,A
2016,Diarrhoea and other common infections,Moray,85 and over,Both sexes,DALY rate,440.1,Yes,A
2016,Neonatal disorders,Moray,Under 15,Male,DALY rate,"1,137.00",Yes,G
2016,Neonatal disorders,Moray,15 to 24,Male,DALY rate,8.6,Yes,G
2016,Neonatal disorders,Moray,25 to 44,Male,DALY rate,0.1,Yes,G
2016,Neonatal disorders,Moray,45 to 64,Male,DALY rate,0,Yes,G
2016,Neonatal disorders,Moray,65 to 84,Male,DALY rate,0,Yes,G
2016,Neonatal disorders,Moray,85 and over,Male,DALY rate,0,Yes,G
2016,Neonatal disorders,Moray,Under 15,Female,DALY rate,13.2,Yes,G
2016,Neonatal disorders,Moray,15 to 24,Female,DALY rate,7.2,Yes,G
2016,Neonatal disorders,Moray,25 to 44,Female,DALY rate,0,Yes,G
2016,Neonatal disorders,Moray,45 to 64,Female,DALY rate,0,Yes,G
2016,Neonatal disorders,Moray,65 to 84,Female,DALY rate,0,Yes,G
2016,Neonatal disorders,Moray,85 and over,Female,DALY rate,0,Yes,G
2016,Neonatal disorders,Moray,Under 15,Both sexes,DALY rate,595.7,Yes,G
2016,Neonatal disorders,Moray,15 to 24,Both sexes,DALY rate,8,Yes,G
2016,Neonatal disorders,Moray,25 to 44,Both sexes,DALY rate,0,Yes,G
2016,Neonatal disorders,Moray,45 to 64,Both sexes,DALY rate,0,Yes,G
2016,Neonatal disorders,Moray,65 to 84,Both sexes,DALY rate,0,Yes,G
2016,Neonatal disorders,Moray,85 and over,Both sexes,DALY rate,0,Yes,G
2016,Maternal disorders,Moray,Under 15,Male,DALY rate,0,Yes,A
2016,Maternal disorders,Moray,15 to 24,Male,DALY rate,0,Yes,A
2016,Maternal disorders,Moray,25 to 44,Male,DALY rate,0,Yes,A
2016,Maternal disorders,Moray,45 to 64,Male,DALY rate,0,Yes,A
2016,Maternal disorders,Moray,65 to 84,Male,DALY rate,0,Yes,A
2016,Maternal disorders,Moray,85 and over,Male,DALY rate,0,Yes,A
2016,Maternal disorders,Moray,Under 15,Female,DALY rate,0,Yes,A
2016,Maternal disorders,Moray,15 to 24,Female,DALY rate,37.9,Yes,A
2016,Maternal disorders,Moray,25 to 44,Female,DALY rate,53.5,Yes,A
2016,Maternal disorders,Moray,45 to 64,Female,DALY rate,0.3,Yes,A
2016,Maternal disorders,Moray,65 to 84,Female,DALY rate,0,Yes,A
2016,Maternal disorders,Moray,85 and over,Female,DALY rate,0,Yes,A
2016,Maternal disorders,Moray,Under 15,Both sexes,DALY rate,0,Yes,A
2016,Maternal disorders,Moray,15 to 24,Both sexes,DALY rate,17.3,Yes,A
2016,Maternal disorders,Moray,25 to 44,Both sexes,DALY rate,26.6,Yes,A
2016,Maternal disorders,Moray,45 to 64,Both sexes,DALY rate,0.1,Yes,A
2016,Maternal disorders,Moray,65 to 84,Both sexes,DALY rate,0,Yes,A
2016,Maternal disorders,Moray,85 and over,Both sexes,DALY rate,0,Yes,A
2016,Nutritional deficiencies,Moray,Under 15,Male,DALY rate,20.1,Yes,R
2016,Nutritional deficiencies,Moray,15 to 24,Male,DALY rate,8.1,Yes,R
2016,Nutritional deficiencies,Moray,25 to 44,Male,DALY rate,6.9,Yes,R
2016,Nutritional deficiencies,Moray,45 to 64,Male,DALY rate,20.3,Yes,R
2016,Nutritional deficiencies,Moray,65 to 84,Male,DALY rate,79.9,Yes,R
2016,Nutritional deficiencies,Moray,85 and over,Male,DALY rate,175.4,Yes,R
2016,Nutritional deficiencies,Moray,Under 15,Female,DALY rate,20.3,Yes,R
2016,Nutritional deficiencies,Moray,15 to 24,Female,DALY rate,93.5,Yes,R
2016,Nutritional deficiencies,Moray,25 to 44,Female,DALY rate,106.4,Yes,R
2016,Nutritional deficiencies,Moray,45 to 64,Female,DALY rate,65.9,Yes,R
2016,Nutritional deficiencies,Moray,65 to 84,Female,DALY rate,130.2,Yes,R
2016,Nutritional deficiencies,Moray,85 and over,Female,DALY rate,643.9,Yes,R
2016,Nutritional deficiencies,Moray,Under 15,Both sexes,DALY rate,20.3,Yes,R
2016,Nutritional deficiencies,Moray,15 to 24,Both sexes,DALY rate,47.4,Yes,R
2016,Nutritional deficiencies,Moray,25 to 44,Both sexes,DALY rate,56.7,Yes,R
2016,Nutritional deficiencies,Moray,45 to 64,Both sexes,DALY rate,43.2,Yes,R
2016,Nutritional deficiencies,Moray,65 to 84,Both sexes,DALY rate,107.7,Yes,R
2016,Nutritional deficiencies,Moray,85 and over,Both sexes,DALY rate,469.8,Yes,R
2016,"Other communicable, maternal, neonatal and nutritional diseases",Moray,Under 15,Male,DALY rate,0.1,Yes,G
2016,"Other communicable, maternal, neonatal and nutritional diseases",Moray,15 to 24,Male,DALY rate,0.4,Yes,G
2016,"Other communicable, maternal, neonatal and nutritional diseases",Moray,25 to 44,Male,DALY rate,1.4,Yes,G
2016,"Other communicable, maternal, neonatal and nutritional diseases",Moray,45 to 64,Male,DALY rate,2.9,Yes,G
2016,"Other communicable, maternal, neonatal and nutritional diseases",Moray,65 to 84,Male,DALY rate,285.4,Yes,G
2016,"Other communicable, maternal, neonatal and nutritional diseases",Moray,85 and over,Male,DALY rate,6.4,Yes,G
2016,"Other communicable, maternal, neonatal and nutritional diseases",Moray,Under 15,Female,DALY rate,3.7,Yes,G
2016,"Other communicable, maternal, neonatal and nutritional diseases",Moray,15 to 24,Female,DALY rate,1.1,Yes,G
2016,"Other communicable, maternal, neonatal and nutritional diseases",Moray,25 to 44,Female,DALY rate,12.5,Yes,G
2016,"Other communicable, maternal, neonatal and nutritional diseases",Moray,45 to 64,Female,DALY rate,3.7,Yes,G
2016,"Other communicable, maternal, neonatal and nutritional diseases",Moray,65 to 84,Female,DALY rate,3.5,Yes,G
2016,"Other communicable, maternal, neonatal and nutritional diseases",Moray,85 and over,Female,DALY rate,1.2,Yes,G
2016,"Other communicable, maternal, neonatal and nutritional diseases",Moray,Under 15,Both sexes,DALY rate,1.8,Yes,G
2016,"Other communicable, maternal, neonatal and nutritional diseases",Moray,15 to 24,Both sexes,DALY rate,0.7,Yes,G
2016,"Other communicable, maternal, neonatal and nutritional diseases",Moray,25 to 44,Both sexes,DALY rate,7,Yes,G
2016,"Other communicable, maternal, neonatal and nutritional diseases",Moray,45 to 64,Both sexes,DALY rate,3.3,Yes,G
2016,"Other communicable, maternal, neonatal and nutritional diseases",Moray,65 to 84,Both sexes,DALY rate,135.3,Yes,G
2016,"Other communicable, maternal, neonatal and nutritional diseases",Moray,85 and over,Both sexes,DALY rate,3.1,Yes,G
2016,Oesophageal cancer,Moray,Under 15,Male,DALY rate,0,Yes,G
2016,Oesophageal cancer,Moray,15 to 24,Male,DALY rate,0,Yes,G
2016,Oesophageal cancer,Moray,25 to 44,Male,DALY rate,141.1,Yes,G
2016,Oesophageal cancer,Moray,45 to 64,Male,DALY rate,266,Yes,G
2016,Oesophageal cancer,Moray,65 to 84,Male,DALY rate,"1,695.20",No,G
2016,Oesophageal cancer,Moray,85 and over,Male,DALY rate,"3,217.60",Yes,G
2016,Oesophageal cancer,Moray,Under 15,Female,DALY rate,0,Yes,G
2016,Oesophageal cancer,Moray,15 to 24,Female,DALY rate,0,Yes,G
2016,Oesophageal cancer,Moray,25 to 44,Female,DALY rate,0,Yes,G
2016,Oesophageal cancer,Moray,45 to 64,Female,DALY rate,222.4,Yes,G
2016,Oesophageal cancer,Moray,65 to 84,Female,DALY rate,880.6,No,G
2016,Oesophageal cancer,Moray,85 and over,Female,DALY rate,159.7,Yes,G
2016,Oesophageal cancer,Moray,Under 15,Both sexes,DALY rate,0,Yes,G
2016,Oesophageal cancer,Moray,15 to 24,Both sexes,DALY rate,0,Yes,G
2016,Oesophageal cancer,Moray,25 to 44,Both sexes,DALY rate,68.9,Yes,G
2016,Oesophageal cancer,Moray,45 to 64,Both sexes,DALY rate,245.1,Yes,G
2016,Oesophageal cancer,Moray,65 to 84,Both sexes,DALY rate,"1,253.00",No,G
2016,Oesophageal cancer,Moray,85 and over,Both sexes,DALY rate,"1,199.00",Yes,G
2016,Stomach cancer,Moray,Under 15,Male,DALY rate,0,Yes,G
2016,Stomach cancer,Moray,15 to 24,Male,DALY rate,0,Yes,G
2016,Stomach cancer,Moray,25 to 44,Male,DALY rate,72.9,Yes,G
2016,Stomach cancer,Moray,45 to 64,Male,DALY rate,1.7,Yes,G
2016,Stomach cancer,Moray,65 to 84,Male,DALY rate,642.1,Yes,G
2016,Stomach cancer,Moray,85 and over,Male,DALY rate,51.5,Yes,G
2016,Stomach cancer,Moray,Under 15,Female,DALY rate,0,Yes,G
2016,Stomach cancer,Moray,15 to 24,Female,DALY rate,0,Yes,G
2016,Stomach cancer,Moray,25 to 44,Female,DALY rate,0.1,Yes,G
2016,Stomach cancer,Moray,45 to 64,Female,DALY rate,1,Yes,G
2016,Stomach cancer,Moray,65 to 84,Female,DALY rate,259.1,Yes,G
2016,Stomach cancer,Moray,85 and over,Female,DALY rate,676.7,Yes,G
2016,Stomach cancer,Moray,Under 15,Both sexes,DALY rate,0,Yes,G
2016,Stomach cancer,Moray,15 to 24,Both sexes,DALY rate,0,Yes,G
2016,Stomach cancer,Moray,25 to 44,Both sexes,DALY rate,35.6,Yes,G
2016,Stomach cancer,Moray,45 to 64,Both sexes,DALY rate,1.3,Yes,G
2016,Stomach cancer,Moray,65 to 84,Both sexes,DALY rate,418.4,Yes,G
2016,Stomach cancer,Moray,85 and over,Both sexes,DALY rate,473.9,Yes,G
2016,Colorectal cancer,Moray,Under 15,Male,DALY rate,6.7,Yes,G
2016,Colorectal cancer,Moray,15 to 24,Male,DALY rate,11.2,Yes,G
2016,Colorectal cancer,Moray,25 to 44,Male,DALY rate,799.6,Yes,G
2016,Colorectal cancer,Moray,45 to 64,Male,DALY rate,593.1,Yes,G
2016,Colorectal cancer,Moray,65 to 84,Male,DALY rate,"2,650.10",No,G
2016,Colorectal cancer,Moray,85 and over,Male,DALY rate,"3,452.50",Yes,G
2016,Colorectal cancer,Moray,Under 15,Female,DALY rate,5,Yes,G
2016,Colorectal cancer,Moray,15 to 24,Female,DALY rate,7.4,Yes,G
2016,Colorectal cancer,Moray,25 to 44,Female,DALY rate,24.1,Yes,G
2016,Colorectal cancer,Moray,45 to 64,Female,DALY rate,567.5,Yes,G
2016,Colorectal cancer,Moray,65 to 84,Female,DALY rate,"1,908.80",No,G
2016,Colorectal cancer,Moray,85 and over,Female,DALY rate,"5,494.00",No,G
2016,Colorectal cancer,Moray,Under 15,Both sexes,DALY rate,5.8,Yes,G
2016,Colorectal cancer,Moray,15 to 24,Both sexes,DALY rate,9.5,Yes,G
2016,Colorectal cancer,Moray,25 to 44,Both sexes,DALY rate,413.1,Yes,G
2016,Colorectal cancer,Moray,45 to 64,Both sexes,DALY rate,581.2,Yes,G
2016,Colorectal cancer,Moray,65 to 84,Both sexes,DALY rate,"2,226.70",No,G
2016,Colorectal cancer,Moray,85 and over,Both sexes,DALY rate,"4,737.60",No,G
2016,Liver cancer,Moray,Under 15,Male,DALY rate,0,Yes,G
2016,Liver cancer,Moray,15 to 24,Male,DALY rate,0,Yes,G
2016,Liver cancer,Moray,25 to 44,Male,DALY rate,55.1,Yes,G
2016,Liver cancer,Moray,45 to 64,Male,DALY rate,264.3,Yes,G
2016,Liver cancer,Moray,65 to 84,Male,DALY rate,52.9,Yes,G
2016,Liver cancer,Moray,85 and over,Male,DALY rate,"1,247.80",Yes,G
2016,Liver cancer,Moray,Under 15,Female,DALY rate,0,Yes,G
2016,Liver cancer,Moray,15 to 24,Female,DALY rate,0,Yes,G
2016,Liver cancer,Moray,25 to 44,Female,DALY rate,0.1,Yes,G
2016,Liver cancer,Moray,45 to 64,Female,DALY rate,0.6,Yes,G
2016,Liver cancer,Moray,65 to 84,Female,DALY rate,257.9,Yes,G
2016,Liver cancer,Moray,85 and over,Female,DALY rate,94.3,Yes,G
2016,Liver cancer,Moray,Under 15,Both sexes,DALY rate,0,Yes,G
2016,Liver cancer,Moray,15 to 24,Both sexes,DALY rate,0,Yes,G
2016,Liver cancer,Moray,25 to 44,Both sexes,DALY rate,27,Yes,G
2016,Liver cancer,Moray,45 to 64,Both sexes,DALY rate,130.9,Yes,G
2016,Liver cancer,Moray,65 to 84,Both sexes,DALY rate,162,Yes,G
2016,Liver cancer,Moray,85 and over,Both sexes,DALY rate,460.5,Yes,G
2016,Pancreatic cancer,Moray,Under 15,Male,DALY rate,0,Yes,G
2016,Pancreatic cancer,Moray,15 to 24,Male,DALY rate,0,Yes,G
2016,Pancreatic cancer,Moray,25 to 44,Male,DALY rate,81.6,Yes,G
2016,Pancreatic cancer,Moray,45 to 64,Male,DALY rate,0.9,Yes,G
2016,Pancreatic cancer,Moray,65 to 84,Male,DALY rate,565.1,Yes,G
2016,Pancreatic cancer,Moray,85 and over,Male,DALY rate,41.2,Yes,G
2016,Pancreatic cancer,Moray,Under 15,Female,DALY rate,0,Yes,G
2016,Pancreatic cancer,Moray,15 to 24,Female,DALY rate,0,Yes,G
2016,Pancreatic cancer,Moray,25 to 44,Female,DALY rate,0.2,Yes,G
2016,Pancreatic cancer,Moray,45 to 64,Female,DALY rate,699.5,Yes,G
2016,Pancreatic cancer,Moray,65 to 84,Female,DALY rate,"1,234.50",No,G
2016,Pancreatic cancer,Moray,85 and over,Female,DALY rate,177.8,Yes,G
2016,Pancreatic cancer,Moray,Under 15,Both sexes,DALY rate,0,Yes,G
2016,Pancreatic cancer,Moray,15 to 24,Both sexes,DALY rate,0,Yes,G
2016,Pancreatic cancer,Moray,25 to 44,Both sexes,DALY rate,39.9,Yes,G
2016,Pancreatic cancer,Moray,45 to 64,Both sexes,DALY rate,356.6,Yes,G
2016,Pancreatic cancer,Moray,65 to 84,Both sexes,DALY rate,916.4,No,G
2016,Pancreatic cancer,Moray,85 and over,Both sexes,DALY rate,127,Yes,G
2016,Lung cancer,Moray,Under 15,Male,DALY rate,0,Yes,G
2016,Lung cancer,Moray,15 to 24,Male,DALY rate,0,Yes,G
2016,Lung cancer,Moray,25 to 44,Male,DALY rate,83.1,Yes,G
2016,Lung cancer,Moray,45 to 64,Male,DALY rate,"1,049.40",Yes,G
2016,Lung cancer,Moray,65 to 84,Male,DALY rate,"8,479.60",No,G
2016,Lung cancer,Moray,85 and over,Male,DALY rate,"6,103.80",No,G
2016,Lung cancer,Moray,Under 15,Female,DALY rate,0,Yes,G
2016,Lung cancer,Moray,15 to 24,Female,DALY rate,0,Yes,G
2016,Lung cancer,Moray,25 to 44,Female,DALY rate,0.4,Yes,G
2016,Lung cancer,Moray,45 to 64,Female,DALY rate,"1,209.20",No,G
2016,Lung cancer,Moray,65 to 84,Female,DALY rate,"3,539.10",No,G
2016,Lung cancer,Moray,85 and over,Female,DALY rate,"2,192.30",Yes,G
2016,Lung cancer,Moray,Under 15,Both sexes,DALY rate,0,Yes,G
2016,Lung cancer,Moray,15 to 24,Both sexes,DALY rate,0,Yes,G
2016,Lung cancer,Moray,25 to 44,Both sexes,DALY rate,40.9,Yes,G
2016,Lung cancer,Moray,45 to 64,Both sexes,DALY rate,"1,134.70",No,G
2016,Lung cancer,Moray,65 to 84,Both sexes,DALY rate,"5,831.10",No,G
2016,Lung cancer,Moray,85 and over,Both sexes,DALY rate,"3,630.40",No,G
2016,Breast cancer,Moray,Under 15,Male,DALY rate,0.1,Yes,G
2016,Breast cancer,Moray,15 to 24,Male,DALY rate,5,Yes,G
2016,Breast cancer,Moray,25 to 44,Male,DALY rate,15.8,Yes,G
2016,Breast cancer,Moray,45 to 64,Male,DALY rate,6.8,Yes,G
2016,Breast cancer,Moray,65 to 84,Male,DALY rate,9.6,Yes,G
2016,Breast cancer,Moray,85 and over,Male,DALY rate,10.3,Yes,G
2016,Breast cancer,Moray,Under 15,Female,DALY rate,0.2,Yes,G
2016,Breast cancer,Moray,15 to 24,Female,DALY rate,17.9,Yes,G
2016,Breast cancer,Moray,25 to 44,Female,DALY rate,91.7,Yes,G
2016,Breast cancer,Moray,45 to 64,Female,DALY rate,"1,540.50",No,G
2016,Breast cancer,Moray,65 to 84,Female,DALY rate,"2,443.20",No,G
2016,Breast cancer,Moray,85 and over,Female,DALY rate,"2,959.80",Yes,G
2016,Breast cancer,Moray,Under 15,Both sexes,DALY rate,0.1,Yes,G
2016,Breast cancer,Moray,15 to 24,Both sexes,DALY rate,10.9,Yes,G
2016,Breast cancer,Moray,25 to 44,Both sexes,DALY rate,54,Yes,G
2016,Breast cancer,Moray,45 to 64,Both sexes,DALY rate,784.8,No,G
2016,Breast cancer,Moray,65 to 84,Both sexes,DALY rate,"1,339.10",No,G
2016,Breast cancer,Moray,85 and over,Both sexes,DALY rate,"1,932.70",Yes,G
2016,Ovarian cancer,Moray,Under 15,Male,DALY rate,0,Yes,G
2016,Ovarian cancer,Moray,15 to 24,Male,DALY rate,0,Yes,G
2016,Ovarian cancer,Moray,25 to 44,Male,DALY rate,0,Yes,G
2016,Ovarian cancer,Moray,45 to 64,Male,DALY rate,0,Yes,G
2016,Ovarian cancer,Moray,65 to 84,Male,DALY rate,0,Yes,G
2016,Ovarian cancer,Moray,85 and over,Male,DALY rate,0,Yes,G
2016,Ovarian cancer,Moray,Under 15,Female,DALY rate,0,Yes,G
2016,Ovarian cancer,Moray,15 to 24,Female,DALY rate,0.5,Yes,G
2016,Ovarian cancer,Moray,25 to 44,Female,DALY rate,2.8,Yes,G
2016,Ovarian cancer,Moray,45 to 64,Female,DALY rate,551,Yes,G
2016,Ovarian cancer,Moray,65 to 84,Female,DALY rate,"1,077.60",No,G
2016,Ovarian cancer,Moray,85 and over,Female,DALY rate,694.2,Yes,G
2016,Ovarian cancer,Moray,Under 15,Both sexes,DALY rate,0,Yes,G
2016,Ovarian cancer,Moray,15 to 24,Both sexes,DALY rate,0.2,Yes,G
2016,Ovarian cancer,Moray,25 to 44,Both sexes,DALY rate,1.4,Yes,G
2016,Ovarian cancer,Moray,45 to 64,Both sexes,DALY rate,278.7,Yes,G
2016,Ovarian cancer,Moray,65 to 84,Both sexes,DALY rate,577.5,No,G
2016,Ovarian cancer,Moray,85 and over,Both sexes,DALY rate,428.4,Yes,G
2016,Prostate cancer,Moray,Under 15,Male,DALY rate,0.1,Yes,G
2016,Prostate cancer,Moray,15 to 24,Male,DALY rate,0,Yes,G
2016,Prostate cancer,Moray,25 to 44,Male,DALY rate,1.8,Yes,G
2016,Prostate cancer,Moray,45 to 64,Male,DALY rate,270.9,Yes,G
2016,Prostate cancer,Moray,65 to 84,Male,DALY rate,"2,494.30",No,G
2016,Prostate cancer,Moray,85 and over,Male,DALY rate,"8,346.40",No,G
2016,Prostate cancer,Moray,Under 15,Female,DALY rate,0,Yes,G
2016,Prostate cancer,Moray,15 to 24,Female,DALY rate,0,Yes,G
2016,Prostate cancer,Moray,25 to 44,Female,DALY rate,0,Yes,G
2016,Prostate cancer,Moray,45 to 64,Female,DALY rate,0,Yes,G
2016,Prostate cancer,Moray,65 to 84,Female,DALY rate,0,Yes,G
2016,Prostate cancer,Moray,85 and over,Female,DALY rate,0,Yes,G
2016,Prostate cancer,Moray,Under 15,Both sexes,DALY rate,0,Yes,G
2016,Prostate cancer,Moray,15 to 24,Both sexes,DALY rate,0,Yes,G
2016,Prostate cancer,Moray,25 to 44,Both sexes,DALY rate,0.9,Yes,G
2016,Prostate cancer,Moray,45 to 64,Both sexes,DALY rate,132.6,Yes,G
2016,Prostate cancer,Moray,65 to 84,Both sexes,DALY rate,"1,114.10",No,G
2016,Prostate cancer,Moray,85 and over,Both sexes,DALY rate,"2,964.30",No,G
2016,Kidney cancer,Moray,Under 15,Male,DALY rate,0.4,Yes,G
2016,Kidney cancer,Moray,15 to 24,Male,DALY rate,0.1,Yes,G
2016,Kidney cancer,Moray,25 to 44,Male,DALY rate,24,Yes,G
2016,Kidney cancer,Moray,45 to 64,Male,DALY rate,852.4,Yes,G
2016,Kidney cancer,Moray,65 to 84,Male,DALY rate,443.4,Yes,G
2016,Kidney cancer,Moray,85 and over,Male,DALY rate,47.6,Yes,G
2016,Kidney cancer,Moray,Under 15,Female,DALY rate,0.2,Yes,G
2016,Kidney cancer,Moray,15 to 24,Female,DALY rate,0.1,Yes,G
2016,Kidney cancer,Moray,25 to 44,Female,DALY rate,0.6,Yes,G
2016,Kidney cancer,Moray,45 to 64,Female,DALY rate,4.9,Yes,G
2016,Kidney cancer,Moray,65 to 84,Female,DALY rate,782,Yes,G
2016,Kidney cancer,Moray,85 and over,Female,DALY rate,36.5,Yes,G
2016,Kidney cancer,Moray,Under 15,Both sexes,DALY rate,0.3,Yes,G
2016,Kidney cancer,Moray,15 to 24,Both sexes,DALY rate,0.1,Yes,G
2016,Kidney cancer,Moray,25 to 44,Both sexes,DALY rate,12.1,Yes,G
2016,Kidney cancer,Moray,45 to 64,Both sexes,DALY rate,427.1,Yes,G
2016,Kidney cancer,Moray,65 to 84,Both sexes,DALY rate,608.8,No,G
2016,Kidney cancer,Moray,85 and over,Both sexes,DALY rate,41.2,Yes,G
2016,Bladder cancer,Moray,Under 15,Male,DALY rate,1,Yes,G
2016,Bladder cancer,Moray,15 to 24,Male,DALY rate,1.6,Yes,G
2016,Bladder cancer,Moray,25 to 44,Male,DALY rate,8.2,Yes,G
2016,Bladder cancer,Moray,45 to 64,Male,DALY rate,7.3,Yes,G
2016,Bladder cancer,Moray,65 to 84,Male,DALY rate,"2,184.80",No,G
2016,Bladder cancer,Moray,85 and over,Male,DALY rate,"2,543.50",Yes,G
2016,Bladder cancer,Moray,Under 15,Female,DALY rate,0,Yes,G
2016,Bladder cancer,Moray,15 to 24,Female,DALY rate,0.4,Yes,G
2016,Bladder cancer,Moray,25 to 44,Female,DALY rate,2.8,Yes,G
2016,Bladder cancer,Moray,45 to 64,Female,DALY rate,261.2,Yes,G
2016,Bladder cancer,Moray,65 to 84,Female,DALY rate,283.6,Yes,G
2016,Bladder cancer,Moray,85 and over,Female,DALY rate,64.5,Yes,G
2016,Bladder cancer,Moray,Under 15,Both sexes,DALY rate,0.5,Yes,G
2016,Bladder cancer,Moray,15 to 24,Both sexes,DALY rate,1,Yes,G
2016,Bladder cancer,Moray,25 to 44,Both sexes,DALY rate,5.4,Yes,G
2016,Bladder cancer,Moray,45 to 64,Both sexes,DALY rate,135.7,Yes,G
2016,Bladder cancer,Moray,65 to 84,Both sexes,DALY rate,"1,148.30",No,G
2016,Bladder cancer,Moray,85 and over,Both sexes,DALY rate,861.7,Yes,G
2016,Non-Hodgkin's lymphoma,Moray,Under 15,Male,DALY rate,0.4,Yes,G
2016,Non-Hodgkin's lymphoma,Moray,15 to 24,Male,DALY rate,0.8,Yes,G
2016,Non-Hodgkin's lymphoma,Moray,25 to 44,Male,DALY rate,29.2,Yes,G
2016,Non-Hodgkin's lymphoma,Moray,45 to 64,Male,DALY rate,8.2,Yes,G
2016,Non-Hodgkin's lymphoma,Moray,65 to 84,Male,DALY rate,785,Yes,G
2016,Non-Hodgkin's lymphoma,Moray,85 and over,Male,DALY rate,67.6,Yes,G
2016,Non-Hodgkin's lymphoma,Moray,Under 15,Female,DALY rate,0.1,Yes,G
2016,Non-Hodgkin's lymphoma,Moray,15 to 24,Female,DALY rate,0.4,Yes,G
2016,Non-Hodgkin's lymphoma,Moray,25 to 44,Female,DALY rate,1.3,Yes,G
2016,Non-Hodgkin's lymphoma,Moray,45 to 64,Female,DALY rate,5.9,Yes,G
2016,Non-Hodgkin's lymphoma,Moray,65 to 84,Female,DALY rate,35.6,Yes,G
2016,Non-Hodgkin's lymphoma,Moray,85 and over,Female,DALY rate,71.4,Yes,G
2016,Non-Hodgkin's lymphoma,Moray,Under 15,Both sexes,DALY rate,0.2,Yes,G
2016,Non-Hodgkin's lymphoma,Moray,15 to 24,Both sexes,DALY rate,0.6,Yes,G
2016,Non-Hodgkin's lymphoma,Moray,25 to 44,Both sexes,DALY rate,14.9,Yes,G
2016,Non-Hodgkin's lymphoma,Moray,45 to 64,Both sexes,DALY rate,7,Yes,G
2016,Non-Hodgkin's lymphoma,Moray,65 to 84,Both sexes,DALY rate,389.4,Yes,G
2016,Non-Hodgkin's lymphoma,Moray,85 and over,Both sexes,DALY rate,71.4,Yes,G
2016,Multiple myeloma,Moray,Under 15,Male,DALY rate,0,Yes,G
2016,Multiple myeloma,Moray,15 to 24,Male,DALY rate,0,Yes,G
2016,Multiple myeloma,Moray,25 to 44,Male,DALY rate,6,Yes,G
2016,Multiple myeloma,Moray,45 to 64,Male,DALY rate,364.9,Yes,G
2016,Multiple myeloma,Moray,65 to 84,Male,DALY rate,720.2,Yes,G
2016,Multiple myeloma,Moray,85 and over,Male,DALY rate,57.1,Yes,G
2016,Multiple myeloma,Moray,Under 15,Female,DALY rate,0,Yes,G
2016,Multiple myeloma,Moray,15 to 24,Female,DALY rate,0,Yes,G
2016,Multiple myeloma,Moray,25 to 44,Female,DALY rate,0.2,Yes,G
2016,Multiple myeloma,Moray,45 to 64,Female,DALY rate,224.3,Yes,G
2016,Multiple myeloma,Moray,65 to 84,Female,DALY rate,387.2,Yes,G
2016,Multiple myeloma,Moray,85 and over,Female,DALY rate,48.4,Yes,G
2016,Multiple myeloma,Moray,Under 15,Both sexes,DALY rate,0,Yes,G
2016,Multiple myeloma,Moray,15 to 24,Both sexes,DALY rate,0,Yes,G
2016,Multiple myeloma,Moray,25 to 44,Both sexes,DALY rate,3,Yes,G
2016,Multiple myeloma,Moray,45 to 64,Both sexes,DALY rate,294.5,Yes,G
2016,Multiple myeloma,Moray,65 to 84,Both sexes,DALY rate,542.9,No,G
2016,Multiple myeloma,Moray,85 and over,Both sexes,DALY rate,52.8,Yes,G
2016,Leukaemia,Moray,Under 15,Male,DALY rate,2.6,Yes,G
2016,Leukaemia,Moray,15 to 24,Male,DALY rate,1.4,Yes,G
2016,Leukaemia,Moray,25 to 44,Male,DALY rate,24.7,Yes,G
2016,Leukaemia,Moray,45 to 64,Male,DALY rate,5.7,Yes,G
2016,Leukaemia,Moray,65 to 84,Male,DALY rate,"1,388.90",No,G
2016,Leukaemia,Moray,85 and over,Male,DALY rate,"1,282.50",Yes,G
2016,Leukaemia,Moray,Under 15,Female,DALY rate,2.3,Yes,G
2016,Leukaemia,Moray,15 to 24,Female,DALY rate,1.1,Yes,G
2016,Leukaemia,Moray,25 to 44,Female,DALY rate,0.9,Yes,G
2016,Leukaemia,Moray,45 to 64,Female,DALY rate,2.8,Yes,G
2016,Leukaemia,Moray,65 to 84,Female,DALY rate,264.9,Yes,G
2016,Leukaemia,Moray,85 and over,Female,DALY rate,57.6,Yes,G
2016,Leukaemia,Moray,Under 15,Both sexes,DALY rate,2.5,Yes,G
2016,Leukaemia,Moray,15 to 24,Both sexes,DALY rate,1.2,Yes,G
2016,Leukaemia,Moray,25 to 44,Both sexes,DALY rate,12.6,Yes,G
2016,Leukaemia,Moray,45 to 64,Both sexes,DALY rate,4.3,Yes,G
2016,Leukaemia,Moray,65 to 84,Both sexes,DALY rate,796.2,No,G
2016,Leukaemia,Moray,85 and over,Both sexes,DALY rate,451,Yes,G
2016,Other cancers,Moray,Under 15,Male,DALY rate,2,Yes,G
2016,Other cancers,Moray,15 to 24,Male,DALY rate,4.2,Yes,G
2016,Other cancers,Moray,25 to 44,Male,DALY rate,216.7,Yes,G
2016,Other cancers,Moray,45 to 64,Male,DALY rate,878,Yes,G
2016,Other cancers,Moray,65 to 84,Male,DALY rate,"4,851.20",No,G
2016,Other cancers,Moray,85 and over,Male,DALY rate,"3,590.90",Yes,G
2016,Other cancers,Moray,Under 15,Female,DALY rate,2,Yes,G
2016,Other cancers,Moray,15 to 24,Female,DALY rate,4.4,Yes,G
2016,Other cancers,Moray,25 to 44,Female,DALY rate,25.2,Yes,G
2016,Other cancers,Moray,45 to 64,Female,DALY rate,779.3,Yes,G
2016,Other cancers,Moray,65 to 84,Female,DALY rate,"1,935.00",No,G
2016,Other cancers,Moray,85 and over,Female,DALY rate,"3,311.20",No,G
2016,Other cancers,Moray,Under 15,Both sexes,DALY rate,2,Yes,G
2016,Other cancers,Moray,15 to 24,Both sexes,DALY rate,4.3,Yes,G
2016,Other cancers,Moray,25 to 44,Both sexes,DALY rate,118.9,Yes,G
2016,Other cancers,Moray,45 to 64,Both sexes,DALY rate,832.5,No,G
2016,Other cancers,Moray,65 to 84,Both sexes,DALY rate,"3,281.50",No,G
2016,Other cancers,Moray,85 and over,Both sexes,DALY rate,"3,371.20",No,G
2016,Ischaemic heart disease,Moray,Under 15,Male,DALY rate,0.7,Yes,G
2016,Ischaemic heart disease,Moray,15 to 24,Male,DALY rate,0.7,Yes,G
2016,Ischaemic heart disease,Moray,25 to 44,Male,DALY rate,18.4,Yes,G
2016,Ischaemic heart disease,Moray,45 to 64,Male,DALY rate,"3,825.30",No,G
2016,Ischaemic heart disease,Moray,65 to 84,Male,DALY rate,"8,182.00",No,G
2016,Ischaemic heart disease,Moray,85 and over,Male,DALY rate,"26,989.90",No,G
2016,Ischaemic heart disease,Moray,Under 15,Female,DALY rate,0.6,Yes,G
2016,Ischaemic heart disease,Moray,15 to 24,Female,DALY rate,0.8,Yes,G
2016,Ischaemic heart disease,Moray,25 to 44,Female,DALY rate,8.5,Yes,G
2016,Ischaemic heart disease,Moray,45 to 64,Female,DALY rate,338.7,Yes,G
2016,Ischaemic heart disease,Moray,65 to 84,Female,DALY rate,"6,047.20",No,G
2016,Ischaemic heart disease,Moray,85 and over,Female,DALY rate,"14,094.30",No,G
2016,Ischaemic heart disease,Moray,Under 15,Both sexes,DALY rate,0.6,Yes,G
2016,Ischaemic heart disease,Moray,15 to 24,Both sexes,DALY rate,0.8,Yes,G
2016,Ischaemic heart disease,Moray,25 to 44,Both sexes,DALY rate,13.4,Yes,G
2016,Ischaemic heart disease,Moray,45 to 64,Both sexes,DALY rate,"2,064.30",No,G
2016,Ischaemic heart disease,Moray,65 to 84,Both sexes,DALY rate,"6,951.60",No,G
2016,Ischaemic heart disease,Moray,85 and over,Both sexes,DALY rate,"18,405.10",No,G
2016,Cerebrovascular disease,Moray,Under 15,Male,DALY rate,10.7,Yes,G
2016,Cerebrovascular disease,Moray,15 to 24,Male,DALY rate,14.2,Yes,G
2016,Cerebrovascular disease,Moray,25 to 44,Male,DALY rate,42.4,Yes,G
2016,Cerebrovascular disease,Moray,45 to 64,Male,DALY rate,548.5,Yes,G
2016,Cerebrovascular disease,Moray,65 to 84,Male,DALY rate,"6,225.20",No,G
2016,Cerebrovascular disease,Moray,85 and over,Male,DALY rate,"19,305.30",No,G
2016,Cerebrovascular disease,Moray,Under 15,Female,DALY rate,5.7,Yes,G
2016,Cerebrovascular disease,Moray,15 to 24,Female,DALY rate,8.9,Yes,G
2016,Cerebrovascular disease,Moray,25 to 44,Female,DALY rate,39.7,Yes,G
2016,Cerebrovascular disease,Moray,45 to 64,Female,DALY rate,"1,495.20",No,G
2016,Cerebrovascular disease,Moray,65 to 84,Female,DALY rate,"6,414.20",No,G
2016,Cerebrovascular disease,Moray,85 and over,Female,DALY rate,"16,994.50",No,G
2016,Cerebrovascular disease,Moray,Under 15,Both sexes,DALY rate,8.2,Yes,G
2016,Cerebrovascular disease,Moray,15 to 24,Both sexes,DALY rate,11.8,Yes,G
2016,Cerebrovascular disease,Moray,25 to 44,Both sexes,DALY rate,41,Yes,G
2016,Cerebrovascular disease,Moray,45 to 64,Both sexes,DALY rate,"1,026.00",No,G
2016,Cerebrovascular disease,Moray,65 to 84,Both sexes,DALY rate,"6,365.70",No,G
2016,Cerebrovascular disease,Moray,85 and over,Both sexes,DALY rate,"18,051.10",No,G
2016,Atrial fibrillation and flutter,Moray,Under 15,Male,DALY rate,0.2,Yes,G
2016,Atrial fibrillation and flutter,Moray,15 to 24,Male,DALY rate,2.8,Yes,G
2016,Atrial fibrillation and flutter,Moray,25 to 44,Male,DALY rate,20.1,Yes,G
2016,Atrial fibrillation and flutter,Moray,45 to 64,Male,DALY rate,129.3,Yes,G
2016,Atrial fibrillation and flutter,Moray,65 to 84,Male,DALY rate,"1,268.40",Yes,G
2016,Atrial fibrillation and flutter,Moray,85 and over,Male,DALY rate,"4,816.00",Yes,G
2016,Atrial fibrillation and flutter,Moray,Under 15,Female,DALY rate,0.2,Yes,G
2016,Atrial fibrillation and flutter,Moray,15 to 24,Female,DALY rate,0.7,Yes,G
2016,Atrial fibrillation and flutter,Moray,25 to 44,Female,DALY rate,6,Yes,G
2016,Atrial fibrillation and flutter,Moray,45 to 64,Female,DALY rate,47.8,Yes,G
2016,Atrial fibrillation and flutter,Moray,65 to 84,Female,DALY rate,"1,126.00",Yes,G
2016,Atrial fibrillation and flutter,Moray,85 and over,Female,DALY rate,"5,373.40",No,G
2016,Atrial fibrillation and flutter,Moray,Under 15,Both sexes,DALY rate,0.2,Yes,G
2016,Atrial fibrillation and flutter,Moray,15 to 24,Both sexes,DALY rate,1.8,Yes,G
2016,Atrial fibrillation and flutter,Moray,25 to 44,Both sexes,DALY rate,13,Yes,G
2016,Atrial fibrillation and flutter,Moray,45 to 64,Both sexes,DALY rate,88,Yes,G
2016,Atrial fibrillation and flutter,Moray,65 to 84,Both sexes,DALY rate,"1,200.20",No,G
2016,Atrial fibrillation and flutter,Moray,85 and over,Both sexes,DALY rate,"5,205.50",No,G
2016,Peripheral vascular disease,Moray,Under 15,Male,DALY rate,0,Yes,G
2016,Peripheral vascular disease,Moray,15 to 24,Male,DALY rate,0,Yes,G
2016,Peripheral vascular disease,Moray,25 to 44,Male,DALY rate,2.1,Yes,G
2016,Peripheral vascular disease,Moray,45 to 64,Male,DALY rate,10.8,Yes,G
2016,Peripheral vascular disease,Moray,65 to 84,Male,DALY rate,23.6,Yes,G
2016,Peripheral vascular disease,Moray,85 and over,Male,DALY rate,12.7,Yes,G
2016,Peripheral vascular disease,Moray,Under 15,Female,DALY rate,0,Yes,G
2016,Peripheral vascular disease,Moray,15 to 24,Female,DALY rate,0,Yes,G
2016,Peripheral vascular disease,Moray,25 to 44,Female,DALY rate,4.9,Yes,G
2016,Peripheral vascular disease,Moray,45 to 64,Female,DALY rate,8.2,Yes,G
2016,Peripheral vascular disease,Moray,65 to 84,Female,DALY rate,260.4,Yes,G
2016,Peripheral vascular disease,Moray,85 and over,Female,DALY rate,"2,473.80",Yes,G
2016,Peripheral vascular disease,Moray,Under 15,Both sexes,DALY rate,0,Yes,G
2016,Peripheral vascular disease,Moray,15 to 24,Both sexes,DALY rate,0,Yes,G
2016,Peripheral vascular disease,Moray,25 to 44,Both sexes,DALY rate,3.5,Yes,G
2016,Peripheral vascular disease,Moray,45 to 64,Both sexes,DALY rate,9.5,Yes,G
2016,Peripheral vascular disease,Moray,65 to 84,Both sexes,DALY rate,149.7,Yes,G
2016,Peripheral vascular disease,Moray,85 and over,Both sexes,DALY rate,"1,595.60",Yes,G
2016,Other cardiovascular and circulatory diseases,Moray,Under 15,Male,DALY rate,31.2,Yes,G
2016,Other cardiovascular and circulatory diseases,Moray,15 to 24,Male,DALY rate,43.6,Yes,G
2016,Other cardiovascular and circulatory diseases,Moray,25 to 44,Male,DALY rate,514,Yes,G
2016,Other cardiovascular and circulatory diseases,Moray,45 to 64,Male,DALY rate,205.8,Yes,G
2016,Other cardiovascular and circulatory diseases,Moray,65 to 84,Male,DALY rate,"3,401.70",No,G
2016,Other cardiovascular and circulatory diseases,Moray,85 and over,Male,DALY rate,"6,728.50",No,G
2016,Other cardiovascular and circulatory diseases,Moray,Under 15,Female,DALY rate,26.5,Yes,G
2016,Other cardiovascular and circulatory diseases,Moray,15 to 24,Female,DALY rate,36.9,Yes,G
2016,Other cardiovascular and circulatory diseases,Moray,25 to 44,Female,DALY rate,100.9,Yes,G
2016,Other cardiovascular and circulatory diseases,Moray,45 to 64,Female,DALY rate,381.8,Yes,G
2016,Other cardiovascular and circulatory diseases,Moray,65 to 84,Female,DALY rate,"2,134.00",No,G
2016,Other cardiovascular and circulatory diseases,Moray,85 and over,Female,DALY rate,"3,976.20",No,G
2016,Other cardiovascular and circulatory diseases,Moray,Under 15,Both sexes,DALY rate,28.9,Yes,G
2016,Other cardiovascular and circulatory diseases,Moray,15 to 24,Both sexes,DALY rate,40.5,Yes,G
2016,Other cardiovascular and circulatory diseases,Moray,25 to 44,Both sexes,DALY rate,302.4,Yes,G
2016,Other cardiovascular and circulatory diseases,Moray,45 to 64,Both sexes,DALY rate,295.7,Yes,G
2016,Other cardiovascular and circulatory diseases,Moray,65 to 84,Both sexes,DALY rate,"2,700.70",No,G
2016,Other cardiovascular and circulatory diseases,Moray,85 and over,Both sexes,DALY rate,"4,857.90",No,G
2016,Asthma,Moray,Under 15,Male,DALY rate,445.3,Yes,A
2016,Asthma,Moray,15 to 24,Male,DALY rate,270.4,Yes,A
2016,Asthma,Moray,25 to 44,Male,DALY rate,245.7,Yes,A
2016,Asthma,Moray,45 to 64,Male,DALY rate,166.4,Yes,A
2016,Asthma,Moray,65 to 84,Male,DALY rate,133.6,Yes,A
2016,Asthma,Moray,85 and over,Male,DALY rate,47.9,Yes,A
2016,Asthma,Moray,Under 15,Female,DALY rate,317.4,Yes,A
2016,Asthma,Moray,15 to 24,Female,DALY rate,386.9,Yes,A
2016,Asthma,Moray,25 to 44,Female,DALY rate,367.2,Yes,A
2016,Asthma,Moray,45 to 64,Female,DALY rate,262.2,Yes,A
2016,Asthma,Moray,65 to 84,Female,DALY rate,210.7,Yes,A
2016,Asthma,Moray,85 and over,Female,DALY rate,78.7,Yes,A
2016,Asthma,Moray,Under 15,Both sexes,DALY rate,383.2,Yes,A
2016,Asthma,Moray,15 to 24,Both sexes,DALY rate,324,Yes,A
2016,Asthma,Moray,25 to 44,Both sexes,DALY rate,306,Yes,A
2016,Asthma,Moray,45 to 64,Both sexes,DALY rate,214.7,Yes,A
2016,Asthma,Moray,65 to 84,Both sexes,DALY rate,174.5,Yes,A
2016,Asthma,Moray,85 and over,Both sexes,DALY rate,67.5,Yes,A
2016,Chronic obstructive pulmonary disease,Moray,Under 15,Male,DALY rate,0.3,Yes,G
2016,Chronic obstructive pulmonary disease,Moray,15 to 24,Male,DALY rate,11.1,Yes,G
2016,Chronic obstructive pulmonary disease,Moray,25 to 44,Male,DALY rate,40.3,Yes,G
2016,Chronic obstructive pulmonary disease,Moray,45 to 64,Male,DALY rate,157.4,Yes,G
2016,Chronic obstructive pulmonary disease,Moray,65 to 84,Male,DALY rate,"4,890.60",No,G
2016,Chronic obstructive pulmonary disease,Moray,85 and over,Male,DALY rate,"7,558.10",No,G
2016,Chronic obstructive pulmonary disease,Moray,Under 15,Female,DALY rate,0.2,Yes,G
2016,Chronic obstructive pulmonary disease,Moray,15 to 24,Female,DALY rate,15,Yes,G
2016,Chronic obstructive pulmonary disease,Moray,25 to 44,Female,DALY rate,66.3,Yes,G
2016,Chronic obstructive pulmonary disease,Moray,45 to 64,Female,DALY rate,"1,100.30",Yes,G
2016,Chronic obstructive pulmonary disease,Moray,65 to 84,Female,DALY rate,"3,499.40",No,G
2016,Chronic obstructive pulmonary disease,Moray,85 and over,Female,DALY rate,"5,378.60",No,G
2016,Chronic obstructive pulmonary disease,Moray,Under 15,Both sexes,DALY rate,0.3,Yes,G
2016,Chronic obstructive pulmonary disease,Moray,15 to 24,Both sexes,DALY rate,12.9,Yes,G
2016,Chronic obstructive pulmonary disease,Moray,25 to 44,Both sexes,DALY rate,53.3,Yes,G
2016,Chronic obstructive pulmonary disease,Moray,45 to 64,Both sexes,DALY rate,637.7,Yes,G
2016,Chronic obstructive pulmonary disease,Moray,65 to 84,Both sexes,DALY rate,"4,125.50",No,G
2016,Chronic obstructive pulmonary disease,Moray,85 and over,Both sexes,DALY rate,"6,089.00",No,G
2016,Other chronic respiratory diseases,Moray,Under 15,Male,DALY rate,1.1,Yes,G
2016,Other chronic respiratory diseases,Moray,15 to 24,Male,DALY rate,2.8,Yes,G
2016,Other chronic respiratory diseases,Moray,25 to 44,Male,DALY rate,8.3,Yes,G
2016,Other chronic respiratory diseases,Moray,45 to 64,Male,DALY rate,294.5,Yes,G
2016,Other chronic respiratory diseases,Moray,65 to 84,Male,DALY rate,"1,910.80",No,G
2016,Other chronic respiratory diseases,Moray,85 and over,Male,DALY rate,"2,198.00",Yes,G
2016,Other chronic respiratory diseases,Moray,Under 15,Female,DALY rate,0.6,Yes,G
2016,Other chronic respiratory diseases,Moray,15 to 24,Female,DALY rate,0.9,Yes,G
2016,Other chronic respiratory diseases,Moray,25 to 44,Female,DALY rate,8,Yes,G
2016,Other chronic respiratory diseases,Moray,45 to 64,Female,DALY rate,278.5,Yes,G
2016,Other chronic respiratory diseases,Moray,65 to 84,Female,DALY rate,"1,600.70",No,G
2016,Other chronic respiratory diseases,Moray,85 and over,Female,DALY rate,87,Yes,G
2016,Other chronic respiratory diseases,Moray,Under 15,Both sexes,DALY rate,0.9,Yes,G
2016,Other chronic respiratory diseases,Moray,15 to 24,Both sexes,DALY rate,1.9,Yes,G
2016,Other chronic respiratory diseases,Moray,25 to 44,Both sexes,DALY rate,8.2,Yes,G
2016,Other chronic respiratory diseases,Moray,45 to 64,Both sexes,DALY rate,286.4,Yes,G
2016,Other chronic respiratory diseases,Moray,65 to 84,Both sexes,DALY rate,"1,728.60",No,G
2016,Other chronic respiratory diseases,Moray,85 and over,Both sexes,DALY rate,898.6,Yes,G
2016,Alcohol use disorders,Moray,Under 15,Male,DALY rate,0,Yes,A
2016,Alcohol use disorders,Moray,15 to 24,Male,DALY rate,155.3,Yes,A
2016,Alcohol use disorders,Moray,25 to 44,Male,DALY rate,392.1,Yes,A
2016,Alcohol use disorders,Moray,45 to 64,Male,DALY rate,"1,179.30",Yes,A
2016,Alcohol use disorders,Moray,65 to 84,Male,DALY rate,"1,444.70",Yes,A
2016,Alcohol use disorders,Moray,85 and over,Male,DALY rate,194.5,Yes,A
2016,Alcohol use disorders,Moray,Under 15,Female,DALY rate,0,Yes,A
2016,Alcohol use disorders,Moray,15 to 24,Female,DALY rate,60.3,Yes,A
2016,Alcohol use disorders,Moray,25 to 44,Female,DALY rate,139.1,Yes,A
2016,Alcohol use disorders,Moray,45 to 64,Female,DALY rate,693.6,Yes,A
2016,Alcohol use disorders,Moray,65 to 84,Female,DALY rate,420.3,Yes,A
2016,Alcohol use disorders,Moray,85 and over,Female,DALY rate,39.5,Yes,A
2016,Alcohol use disorders,Moray,Under 15,Both sexes,DALY rate,0,Yes,A
2016,Alcohol use disorders,Moray,15 to 24,Both sexes,DALY rate,111.6,Yes,A
2016,Alcohol use disorders,Moray,25 to 44,Both sexes,DALY rate,265.3,Yes,A
2016,Alcohol use disorders,Moray,45 to 64,Both sexes,DALY rate,937.3,Yes,A
2016,Alcohol use disorders,Moray,65 to 84,Both sexes,DALY rate,893.5,No,A
2016,Alcohol use disorders,Moray,85 and over,Both sexes,DALY rate,96.9,Yes,A
2016,Drug use disorders,Moray,Under 15,Male,DALY rate,0.3,Yes,A
2016,Drug use disorders,Moray,15 to 24,Male,DALY rate,"2,988.30",Yes,A
2016,Drug use disorders,Moray,25 to 44,Male,DALY rate,"1,620.50",Yes,A
2016,Drug use disorders,Moray,45 to 64,Male,DALY rate,480.2,Yes,A
2016,Drug use disorders,Moray,65 to 84,Male,DALY rate,20.7,Yes,A
2016,Drug use disorders,Moray,85 and over,Male,DALY rate,10.5,Yes,A
2016,Drug use disorders,Moray,Under 15,Female,DALY rate,0.4,Yes,A
2016,Drug use disorders,Moray,15 to 24,Female,DALY rate,"1,600.80",Yes,A
2016,Drug use disorders,Moray,25 to 44,Female,DALY rate,755.1,Yes,A
2016,Drug use disorders,Moray,45 to 64,Female,DALY rate,70.1,Yes,A
2016,Drug use disorders,Moray,65 to 84,Female,DALY rate,10.1,Yes,A
2016,Drug use disorders,Moray,85 and over,Female,DALY rate,7.7,Yes,A
2016,Drug use disorders,Moray,Under 15,Both sexes,DALY rate,0.4,Yes,A
2016,Drug use disorders,Moray,15 to 24,Both sexes,DALY rate,"2,371.20",Yes,A
2016,Drug use disorders,Moray,25 to 44,Both sexes,DALY rate,"1,200.90",Yes,A
2016,Drug use disorders,Moray,45 to 64,Both sexes,DALY rate,273.5,Yes,A
2016,Drug use disorders,Moray,65 to 84,Both sexes,DALY rate,15.1,Yes,A
2016,Drug use disorders,Moray,85 and over,Both sexes,DALY rate,8.7,Yes,A
2016,Peptic ulcer disease,Moray,Under 15,Male,DALY rate,0,Yes,G
2016,Peptic ulcer disease,Moray,15 to 24,Male,DALY rate,0.3,Yes,G
2016,Peptic ulcer disease,Moray,25 to 44,Male,DALY rate,0.9,Yes,G
2016,Peptic ulcer disease,Moray,45 to 64,Male,DALY rate,2.4,Yes,G
2016,Peptic ulcer disease,Moray,65 to 84,Male,DALY rate,614.3,Yes,G
2016,Peptic ulcer disease,Moray,85 and over,Male,DALY rate,12.2,Yes,G
2016,Peptic ulcer disease,Moray,Under 15,Female,DALY rate,0,Yes,G
2016,Peptic ulcer disease,Moray,15 to 24,Female,DALY rate,0.2,Yes,G
2016,Peptic ulcer disease,Moray,25 to 44,Female,DALY rate,0.6,Yes,G
2016,Peptic ulcer disease,Moray,45 to 64,Female,DALY rate,1.6,Yes,G
2016,Peptic ulcer disease,Moray,65 to 84,Female,DALY rate,4.6,Yes,G
2016,Peptic ulcer disease,Moray,85 and over,Female,DALY rate,17.5,Yes,G
2016,Peptic ulcer disease,Moray,Under 15,Both sexes,DALY rate,0,Yes,G
2016,Peptic ulcer disease,Moray,15 to 24,Both sexes,DALY rate,0.3,Yes,G
2016,Peptic ulcer disease,Moray,25 to 44,Both sexes,DALY rate,0.7,Yes,G
2016,Peptic ulcer disease,Moray,45 to 64,Both sexes,DALY rate,2,Yes,G
2016,Peptic ulcer disease,Moray,65 to 84,Both sexes,DALY rate,293.7,Yes,G
2016,Peptic ulcer disease,Moray,85 and over,Both sexes,DALY rate,16,Yes,G
2016,Inflammatory bowel disease,Moray,Under 15,Male,DALY rate,7.9,Yes,A
2016,Inflammatory bowel disease,Moray,15 to 24,Male,DALY rate,53.6,Yes,A
2016,Inflammatory bowel disease,Moray,25 to 44,Male,DALY rate,101.3,Yes,A
2016,Inflammatory bowel disease,Moray,45 to 64,Male,DALY rate,128.1,Yes,A
2016,Inflammatory bowel disease,Moray,65 to 84,Male,DALY rate,148.6,Yes,A
2016,Inflammatory bowel disease,Moray,85 and over,Male,DALY rate,"1,115.30",Yes,A
2016,Inflammatory bowel disease,Moray,Under 15,Female,DALY rate,5.9,Yes,A
2016,Inflammatory bowel disease,Moray,15 to 24,Female,DALY rate,41,Yes,A
2016,Inflammatory bowel disease,Moray,25 to 44,Female,DALY rate,110.4,Yes,A
2016,Inflammatory bowel disease,Moray,45 to 64,Female,DALY rate,137,Yes,A
2016,Inflammatory bowel disease,Moray,65 to 84,Female,DALY rate,142.4,Yes,A
2016,Inflammatory bowel disease,Moray,85 and over,Female,DALY rate,689.6,Yes,A
2016,Inflammatory bowel disease,Moray,Under 15,Both sexes,DALY rate,6.9,Yes,A
2016,Inflammatory bowel disease,Moray,15 to 24,Both sexes,DALY rate,47.8,Yes,A
2016,Inflammatory bowel disease,Moray,25 to 44,Both sexes,DALY rate,105.9,Yes,A
2016,Inflammatory bowel disease,Moray,45 to 64,Both sexes,DALY rate,132.6,Yes,A
2016,Inflammatory bowel disease,Moray,65 to 84,Both sexes,DALY rate,145.4,Yes,A
2016,Inflammatory bowel disease,Moray,85 and over,Both sexes,DALY rate,891.8,Yes,A
2016,Gallbladder and biliary diseases,Moray,Under 15,Male,DALY rate,0.5,Yes,A
2016,Gallbladder and biliary diseases,Moray,15 to 24,Male,DALY rate,3.4,Yes,A
2016,Gallbladder and biliary diseases,Moray,25 to 44,Male,DALY rate,16.1,Yes,A
2016,Gallbladder and biliary diseases,Moray,45 to 64,Male,DALY rate,42.1,Yes,A
2016,Gallbladder and biliary diseases,Moray,65 to 84,Male,DALY rate,265,Yes,A
2016,Gallbladder and biliary diseases,Moray,85 and over,Male,DALY rate,"2,344.50",Yes,A
2016,Gallbladder and biliary diseases,Moray,Under 15,Female,DALY rate,0.9,Yes,A
2016,Gallbladder and biliary diseases,Moray,15 to 24,Female,DALY rate,22.6,Yes,A
2016,Gallbladder and biliary diseases,Moray,25 to 44,Female,DALY rate,72.6,Yes,A
2016,Gallbladder and biliary diseases,Moray,45 to 64,Female,DALY rate,88.7,Yes,A
2016,Gallbladder and biliary diseases,Moray,65 to 84,Female,DALY rate,344.5,Yes,A
2016,Gallbladder and biliary diseases,Moray,85 and over,Female,DALY rate,922.1,Yes,A
2016,Gallbladder and biliary diseases,Moray,Under 15,Both sexes,DALY rate,0.7,Yes,A
2016,Gallbladder and biliary diseases,Moray,15 to 24,Both sexes,DALY rate,12.2,Yes,A
2016,Gallbladder and biliary diseases,Moray,25 to 44,Both sexes,DALY rate,44.3,Yes,A
2016,Gallbladder and biliary diseases,Moray,45 to 64,Both sexes,DALY rate,65.6,Yes,A
2016,Gallbladder and biliary diseases,Moray,65 to 84,Both sexes,DALY rate,311.1,Yes,A
2016,Gallbladder and biliary diseases,Moray,85 and over,Both sexes,DALY rate,"1,393.70",Yes,A
2016,Pancreatitis,Moray,Under 15,Male,DALY rate,1.1,Yes,G
2016,Pancreatitis,Moray,15 to 24,Male,DALY rate,3.5,Yes,G
2016,Pancreatitis,Moray,25 to 44,Male,DALY rate,14.1,Yes,G
2016,Pancreatitis,Moray,45 to 64,Male,DALY rate,111.2,Yes,G
2016,Pancreatitis,Moray,65 to 84,Male,DALY rate,325.3,Yes,G
2016,Pancreatitis,Moray,85 and over,Male,DALY rate,45.2,Yes,G
2016,Pancreatitis,Moray,Under 15,Female,DALY rate,1.2,Yes,G
2016,Pancreatitis,Moray,15 to 24,Female,DALY rate,3,Yes,G
2016,Pancreatitis,Moray,25 to 44,Female,DALY rate,10.9,Yes,G
2016,Pancreatitis,Moray,45 to 64,Female,DALY rate,21.6,Yes,G
2016,Pancreatitis,Moray,65 to 84,Female,DALY rate,293.9,Yes,G
2016,Pancreatitis,Moray,85 and over,Female,DALY rate,45.8,Yes,G
2016,Pancreatitis,Moray,Under 15,Both sexes,DALY rate,1.2,Yes,G
2016,Pancreatitis,Moray,15 to 24,Both sexes,DALY rate,3.3,Yes,G
2016,Pancreatitis,Moray,25 to 44,Both sexes,DALY rate,12.4,Yes,G
2016,Pancreatitis,Moray,45 to 64,Both sexes,DALY rate,65.5,Yes,G
2016,Pancreatitis,Moray,65 to 84,Both sexes,DALY rate,306,Yes,G
2016,Pancreatitis,Moray,85 and over,Both sexes,DALY rate,45.7,Yes,G
2016,Cirrhosis and other chronic liver diseases,Moray,Under 15,Male,DALY rate,1.8,Yes,G
2016,Cirrhosis and other chronic liver diseases,Moray,15 to 24,Male,DALY rate,4.1,Yes,G
2016,Cirrhosis and other chronic liver diseases,Moray,25 to 44,Male,DALY rate,"1,514.60",Yes,G
2016,Cirrhosis and other chronic liver diseases,Moray,45 to 64,Male,DALY rate,885.4,Yes,G
2016,Cirrhosis and other chronic liver diseases,Moray,65 to 84,Male,DALY rate,"2,469.30",No,G
2016,Cirrhosis and other chronic liver diseases,Moray,85 and over,Male,DALY rate,38.7,Yes,G
2016,Cirrhosis and other chronic liver diseases,Moray,Under 15,Female,DALY rate,1.1,Yes,G
2016,Cirrhosis and other chronic liver diseases,Moray,15 to 24,Female,DALY rate,4.2,Yes,G
2016,Cirrhosis and other chronic liver diseases,Moray,25 to 44,Female,DALY rate,15.6,Yes,G
2016,Cirrhosis and other chronic liver diseases,Moray,45 to 64,Female,DALY rate,609.3,Yes,G
2016,Cirrhosis and other chronic liver diseases,Moray,65 to 84,Female,DALY rate,318.2,Yes,G
2016,Cirrhosis and other chronic liver diseases,Moray,85 and over,Female,DALY rate,40.3,Yes,G
2016,Cirrhosis and other chronic liver diseases,Moray,Under 15,Both sexes,DALY rate,1.5,Yes,G
2016,Cirrhosis and other chronic liver diseases,Moray,15 to 24,Both sexes,DALY rate,4.2,Yes,G
2016,Cirrhosis and other chronic liver diseases,Moray,25 to 44,Both sexes,DALY rate,758.3,Yes,G
2016,Cirrhosis and other chronic liver diseases,Moray,45 to 64,Both sexes,DALY rate,743.1,No,G
2016,Cirrhosis and other chronic liver diseases,Moray,65 to 84,Both sexes,DALY rate,"1,308.50",No,G
2016,Cirrhosis and other chronic liver diseases,Moray,85 and over,Both sexes,DALY rate,40,Yes,G
2016,Other digestive diseases,Moray,Under 15,Male,DALY rate,"1,053.90",Yes,A
2016,Other digestive diseases,Moray,15 to 24,Male,DALY rate,13.9,Yes,A
2016,Other digestive diseases,Moray,25 to 44,Male,DALY rate,33.7,Yes,A
2016,Other digestive diseases,Moray,45 to 64,Male,DALY rate,120.7,Yes,A
2016,Other digestive diseases,Moray,65 to 84,Male,DALY rate,579.3,Yes,A
2016,Other digestive diseases,Moray,85 and over,Male,DALY rate,"2,583.50",Yes,A
2016,Other digestive diseases,Moray,Under 15,Female,DALY rate,9.4,Yes,A
2016,Other digestive diseases,Moray,15 to 24,Female,DALY rate,6.2,Yes,A
2016,Other digestive diseases,Moray,25 to 44,Female,DALY rate,24.5,Yes,A
2016,Other digestive diseases,Moray,45 to 64,Female,DALY rate,79.9,Yes,A
2016,Other digestive diseases,Moray,65 to 84,Female,DALY rate,588.4,Yes,A
2016,Other digestive diseases,Moray,85 and over,Female,DALY rate,"3,178.60",Yes,A
2016,Other digestive diseases,Moray,Under 15,Both sexes,DALY rate,543.8,Yes,A
2016,Other digestive diseases,Moray,15 to 24,Both sexes,DALY rate,10.4,Yes,A
2016,Other digestive diseases,Moray,25 to 44,Both sexes,DALY rate,29,Yes,A
2016,Other digestive diseases,Moray,45 to 64,Both sexes,DALY rate,99.9,Yes,A
2016,Other digestive diseases,Moray,65 to 84,Both sexes,DALY rate,584.5,Yes,A
2016,Other digestive diseases,Moray,85 and over,Both sexes,DALY rate,"2,957.60",No,A
2016,Alzheimer's disease and other dementias,Moray,Under 15,Male,DALY rate,0,Yes,G
2016,Alzheimer's disease and other dementias,Moray,15 to 24,Male,DALY rate,0,Yes,G
2016,Alzheimer's disease and other dementias,Moray,25 to 44,Male,DALY rate,0.4,Yes,G
2016,Alzheimer's disease and other dementias,Moray,45 to 64,Male,DALY rate,162.9,Yes,G
2016,Alzheimer's disease and other dementias,Moray,65 to 84,Male,DALY rate,"3,700.80",No,G
2016,Alzheimer's disease and other dementias,Moray,85 and over,Male,DALY rate,"23,762.80",No,G
2016,Alzheimer's disease and other dementias,Moray,Under 15,Female,DALY rate,0,Yes,G
2016,Alzheimer's disease and other dementias,Moray,15 to 24,Female,DALY rate,0,Yes,G
2016,Alzheimer's disease and other dementias,Moray,25 to 44,Female,DALY rate,2,Yes,G
2016,Alzheimer's disease and other dementias,Moray,45 to 64,Female,DALY rate,251.4,Yes,G
2016,Alzheimer's disease and other dementias,Moray,65 to 84,Female,DALY rate,"2,767.20",No,G
2016,Alzheimer's disease and other dementias,Moray,85 and over,Female,DALY rate,"27,897.80",No,G
2016,Alzheimer's disease and other dementias,Moray,Under 15,Both sexes,DALY rate,0,Yes,G
2016,Alzheimer's disease and other dementias,Moray,15 to 24,Both sexes,DALY rate,0,Yes,G
2016,Alzheimer's disease and other dementias,Moray,25 to 44,Both sexes,DALY rate,1.2,Yes,G
2016,Alzheimer's disease and other dementias,Moray,45 to 64,Both sexes,DALY rate,208.7,Yes,G
2016,Alzheimer's disease and other dementias,Moray,65 to 84,Both sexes,DALY rate,"3,146.80",No,G
2016,Alzheimer's disease and other dementias,Moray,85 and over,Both sexes,DALY rate,"26,674.60",No,G
2016,Parkinson's disease,Moray,Under 15,Male,DALY rate,0.8,Yes,G
2016,Parkinson's disease,Moray,15 to 24,Male,DALY rate,0,Yes,G
2016,Parkinson's disease,Moray,25 to 44,Male,DALY rate,2.3,Yes,G
2016,Parkinson's disease,Moray,45 to 64,Male,DALY rate,33.7,Yes,G
2016,Parkinson's disease,Moray,65 to 84,Male,DALY rate,884.7,Yes,G
2016,Parkinson's disease,Moray,85 and over,Male,DALY rate,"2,134.20",Yes,G
2016,Parkinson's disease,Moray,Under 15,Female,DALY rate,0,Yes,G
2016,Parkinson's disease,Moray,15 to 24,Female,DALY rate,0,Yes,G
2016,Parkinson's disease,Moray,25 to 44,Female,DALY rate,0.4,Yes,G
2016,Parkinson's disease,Moray,45 to 64,Female,DALY rate,23.1,Yes,G
2016,Parkinson's disease,Moray,65 to 84,Female,DALY rate,218.5,Yes,G
2016,Parkinson's disease,Moray,85 and over,Female,DALY rate,"1,784.90",Yes,G
2016,Parkinson's disease,Moray,Under 15,Both sexes,DALY rate,0.4,Yes,G
2016,Parkinson's disease,Moray,15 to 24,Both sexes,DALY rate,0,Yes,G
2016,Parkinson's disease,Moray,25 to 44,Both sexes,DALY rate,1.3,Yes,G
2016,Parkinson's disease,Moray,45 to 64,Both sexes,DALY rate,28.3,Yes,G
2016,Parkinson's disease,Moray,65 to 84,Both sexes,DALY rate,519.5,Yes,G
2016,Parkinson's disease,Moray,85 and over,Both sexes,DALY rate,"1,947.40",No,G
2016,Epilepsy,Moray,Under 15,Male,DALY rate,60.9,Yes,A
2016,Epilepsy,Moray,15 to 24,Male,DALY rate,522,Yes,A
2016,Epilepsy,Moray,25 to 44,Male,DALY rate,156.7,Yes,A
2016,Epilepsy,Moray,45 to 64,Male,DALY rate,170.5,Yes,A
2016,Epilepsy,Moray,65 to 84,Male,DALY rate,194.5,Yes,A
2016,Epilepsy,Moray,85 and over,Male,DALY rate,"1,199.00",Yes,A
2016,Epilepsy,Moray,Under 15,Female,DALY rate,52.4,Yes,A
2016,Epilepsy,Moray,15 to 24,Female,DALY rate,116.9,Yes,A
2016,Epilepsy,Moray,25 to 44,Female,DALY rate,171.1,Yes,A
2016,Epilepsy,Moray,45 to 64,Female,DALY rate,156.3,Yes,A
2016,Epilepsy,Moray,65 to 84,Female,DALY rate,159,Yes,A
2016,Epilepsy,Moray,85 and over,Female,DALY rate,172.1,Yes,A
2016,Epilepsy,Moray,Under 15,Both sexes,DALY rate,56.8,Yes,A
2016,Epilepsy,Moray,15 to 24,Both sexes,DALY rate,332.9,Yes,A
2016,Epilepsy,Moray,25 to 44,Both sexes,DALY rate,164.1,Yes,A
2016,Epilepsy,Moray,45 to 64,Both sexes,DALY rate,163.4,Yes,A
2016,Epilepsy,Moray,65 to 84,Both sexes,DALY rate,175.4,Yes,A
2016,Epilepsy,Moray,85 and over,Both sexes,DALY rate,567.9,Yes,A
2016,Multiple sclerosis,Moray,Under 15,Male,DALY rate,0.2,Yes,G
2016,Multiple sclerosis,Moray,15 to 24,Male,DALY rate,1.5,Yes,G
2016,Multiple sclerosis,Moray,25 to 44,Male,DALY rate,21.6,Yes,G
2016,Multiple sclerosis,Moray,45 to 64,Male,DALY rate,51.9,Yes,G
2016,Multiple sclerosis,Moray,65 to 84,Male,DALY rate,833.4,Yes,G
2016,Multiple sclerosis,Moray,85 and over,Male,DALY rate,11.5,Yes,G
2016,Multiple sclerosis,Moray,Under 15,Female,DALY rate,0.1,Yes,G
2016,Multiple sclerosis,Moray,15 to 24,Female,DALY rate,5.6,Yes,G
2016,Multiple sclerosis,Moray,25 to 44,Female,DALY rate,62.3,Yes,G
2016,Multiple sclerosis,Moray,45 to 64,Female,DALY rate,390.4,Yes,G
2016,Multiple sclerosis,Moray,65 to 84,Female,DALY rate,193.9,Yes,G
2016,Multiple sclerosis,Moray,85 and over,Female,DALY rate,233.6,Yes,G
2016,Multiple sclerosis,Moray,Under 15,Both sexes,DALY rate,0.1,Yes,G
2016,Multiple sclerosis,Moray,15 to 24,Both sexes,DALY rate,3.4,Yes,G
2016,Multiple sclerosis,Moray,25 to 44,Both sexes,DALY rate,42,Yes,G
2016,Multiple sclerosis,Moray,45 to 64,Both sexes,DALY rate,223,Yes,G
2016,Multiple sclerosis,Moray,65 to 84,Both sexes,DALY rate,495.9,Yes,G
2016,Multiple sclerosis,Moray,85 and over,Both sexes,DALY rate,148.3,Yes,G
2016,Headache disorders,Moray,Under 15,Male,DALY rate,291.6,Yes,R
2016,Headache disorders,Moray,15 to 24,Male,DALY rate,750.5,Yes,R
2016,Headache disorders,Moray,25 to 44,Male,DALY rate,884.6,Yes,R
2016,Headache disorders,Moray,45 to 64,Male,DALY rate,728.6,Yes,R
2016,Headache disorders,Moray,65 to 84,Male,DALY rate,389.3,Yes,R
2016,Headache disorders,Moray,85 and over,Male,DALY rate,238.1,Yes,R
2016,Headache disorders,Moray,Under 15,Female,DALY rate,330.6,Yes,R
2016,Headache disorders,Moray,15 to 24,Female,DALY rate,"1,547.00",Yes,R
2016,Headache disorders,Moray,25 to 44,Female,DALY rate,"2,234.30",Yes,R
2016,Headache disorders,Moray,45 to 64,Female,DALY rate,"1,613.10",Yes,R
2016,Headache disorders,Moray,65 to 84,Female,DALY rate,681.7,Yes,R
2016,Headache disorders,Moray,85 and over,Female,DALY rate,261.7,Yes,R
2016,Headache disorders,Moray,Under 15,Both sexes,DALY rate,310.6,Yes,R
2016,Headache disorders,Moray,15 to 24,Both sexes,DALY rate,"1,116.00",Yes,R
2016,Headache disorders,Moray,25 to 44,Both sexes,DALY rate,"1,557.20",Yes,R
2016,Headache disorders,Moray,45 to 64,Both sexes,DALY rate,"1,173.30",Yes,R
2016,Headache disorders,Moray,65 to 84,Both sexes,DALY rate,544.5,Yes,R
2016,Headache disorders,Moray,85 and over,Both sexes,DALY rate,252.1,Yes,R
2016,Other neurological disorders,Moray,Under 15,Male,DALY rate,6.3,Yes,G
2016,Other neurological disorders,Moray,15 to 24,Male,DALY rate,4.5,Yes,G
2016,Other neurological disorders,Moray,25 to 44,Male,DALY rate,8.3,Yes,G
2016,Other neurological disorders,Moray,45 to 64,Male,DALY rate,570.3,Yes,G
2016,Other neurological disorders,Moray,65 to 84,Male,DALY rate,554.9,Yes,G
2016,Other neurological disorders,Moray,85 and over,Male,DALY rate,35.1,Yes,G
2016,Other neurological disorders,Moray,Under 15,Female,DALY rate,1.2,Yes,G
2016,Other neurological disorders,Moray,15 to 24,Female,DALY rate,1.6,Yes,G
2016,Other neurological disorders,Moray,25 to 44,Female,DALY rate,8.6,Yes,G
2016,Other neurological disorders,Moray,45 to 64,Female,DALY rate,15.9,Yes,G
2016,Other neurological disorders,Moray,65 to 84,Female,DALY rate,741.1,Yes,G
2016,Other neurological disorders,Moray,85 and over,Female,DALY rate,651.9,Yes,G
2016,Other neurological disorders,Moray,Under 15,Both sexes,DALY rate,3.8,Yes,G
2016,Other neurological disorders,Moray,15 to 24,Both sexes,DALY rate,3.1,Yes,G
2016,Other neurological disorders,Moray,25 to 44,Both sexes,DALY rate,8.5,Yes,G
2016,Other neurological disorders,Moray,45 to 64,Both sexes,DALY rate,292.2,Yes,G
2016,Other neurological disorders,Moray,65 to 84,Both sexes,DALY rate,668.3,No,G
2016,Other neurological disorders,Moray,85 and over,Both sexes,DALY rate,413.9,Yes,G
2016,Schizophrenia,Moray,Under 15,Male,DALY rate,0,Yes,G
2016,Schizophrenia,Moray,15 to 24,Male,DALY rate,43,Yes,G
2016,Schizophrenia,Moray,25 to 44,Male,DALY rate,355.8,Yes,G
2016,Schizophrenia,Moray,45 to 64,Male,DALY rate,311.4,Yes,G
2016,Schizophrenia,Moray,65 to 84,Male,DALY rate,137.6,Yes,G
2016,Schizophrenia,Moray,85 and over,Male,DALY rate,40.6,Yes,G
2016,Schizophrenia,Moray,Under 15,Female,DALY rate,0,Yes,G
2016,Schizophrenia,Moray,15 to 24,Female,DALY rate,19.4,Yes,G
2016,Schizophrenia,Moray,25 to 44,Female,DALY rate,135.7,Yes,G
2016,Schizophrenia,Moray,45 to 64,Female,DALY rate,415.4,Yes,G
2016,Schizophrenia,Moray,65 to 84,Female,DALY rate,157.6,Yes,G
2016,Schizophrenia,Moray,85 and over,Female,DALY rate,69,Yes,G
2016,Schizophrenia,Moray,Under 15,Both sexes,DALY rate,0,Yes,G
2016,Schizophrenia,Moray,15 to 24,Both sexes,DALY rate,32.3,Yes,G
2016,Schizophrenia,Moray,25 to 44,Both sexes,DALY rate,245.6,Yes,G
2016,Schizophrenia,Moray,45 to 64,Both sexes,DALY rate,365.6,Yes,G
2016,Schizophrenia,Moray,65 to 84,Both sexes,DALY rate,148.5,Yes,G
2016,Schizophrenia,Moray,85 and over,Both sexes,DALY rate,58.4,Yes,G
2016,Depression,Moray,Under 15,Male,DALY rate,0,Yes,G
2016,Depression,Moray,15 to 24,Male,DALY rate,656,Yes,G
2016,Depression,Moray,25 to 44,Male,DALY rate,"1,416.10",Yes,G
2016,Depression,Moray,45 to 64,Male,DALY rate,"1,486.60",Yes,G
2016,Depression,Moray,65 to 84,Male,DALY rate,"1,177.90",Yes,G
2016,Depression,Moray,85 and over,Male,DALY rate,"1,449.30",Yes,G
2016,Depression,Moray,Under 15,Female,DALY rate,0,Yes,G
2016,Depression,Moray,15 to 24,Female,DALY rate,672.5,Yes,G
2016,Depression,Moray,25 to 44,Female,DALY rate,"1,418.90",Yes,G
2016,Depression,Moray,45 to 64,Female,DALY rate,"1,583.70",Yes,G
2016,Depression,Moray,65 to 84,Female,DALY rate,"1,180.20",Yes,G
2016,Depression,Moray,85 and over,Female,DALY rate,"1,183.00",Yes,G
2016,Depression,Moray,Under 15,Both sexes,DALY rate,0,Yes,G
2016,Depression,Moray,15 to 24,Both sexes,DALY rate,664.4,Yes,G
2016,Depression,Moray,25 to 44,Both sexes,DALY rate,"1,419.40",Yes,G
2016,Depression,Moray,45 to 64,Both sexes,DALY rate,"1,534.40",Yes,G
2016,Depression,Moray,65 to 84,Both sexes,DALY rate,"1,179.60",Yes,G
2016,Depression,Moray,85 and over,Both sexes,DALY rate,"1,270.50",Yes,G
2016,Anxiety disorders,Moray,Under 15,Male,DALY rate,0,Yes,G
2016,Anxiety disorders,Moray,15 to 24,Male,DALY rate,314.3,Yes,G
2016,Anxiety disorders,Moray,25 to 44,Male,DALY rate,676.8,Yes,G
2016,Anxiety disorders,Moray,45 to 64,Male,DALY rate,769,Yes,G
2016,Anxiety disorders,Moray,65 to 84,Male,DALY rate,646.9,Yes,G
2016,Anxiety disorders,Moray,85 and over,Male,DALY rate,736.8,Yes,G
2016,Anxiety disorders,Moray,Under 15,Female,DALY rate,0,Yes,G
2016,Anxiety disorders,Moray,15 to 24,Female,DALY rate,553.3,Yes,G
2016,Anxiety disorders,Moray,25 to 44,Female,DALY rate,"1,179.40",Yes,G
2016,Anxiety disorders,Moray,45 to 64,Female,DALY rate,"1,377.00",Yes,G
2016,Anxiety disorders,Moray,65 to 84,Female,DALY rate,"1,077.30",Yes,G
2016,Anxiety disorders,Moray,85 and over,Female,DALY rate,"1,005.20",Yes,G
2016,Anxiety disorders,Moray,Under 15,Both sexes,DALY rate,0,Yes,G
2016,Anxiety disorders,Moray,15 to 24,Both sexes,DALY rate,424.4,Yes,G
2016,Anxiety disorders,Moray,25 to 44,Both sexes,DALY rate,929.4,Yes,G
2016,Anxiety disorders,Moray,45 to 64,Both sexes,DALY rate,"1,074.20",Yes,G
2016,Anxiety disorders,Moray,65 to 84,Both sexes,DALY rate,879,Yes,G
2016,Anxiety disorders,Moray,85 and over,Both sexes,DALY rate,901.9,Yes,G
2016,Other mental health disorders,Moray,Under 15,Male,DALY rate,251.4,Yes,R
2016,Other mental health disorders,Moray,15 to 24,Male,DALY rate,190.4,Yes,R
2016,Other mental health disorders,Moray,25 to 44,Male,DALY rate,155.8,Yes,R
2016,Other mental health disorders,Moray,45 to 64,Male,DALY rate,135.3,Yes,R
2016,Other mental health disorders,Moray,65 to 84,Male,DALY rate,117.3,Yes,R
2016,Other mental health disorders,Moray,85 and over,Male,DALY rate,299.4,Yes,R
2016,Other mental health disorders,Moray,Under 15,Female,DALY rate,92.3,Yes,R
2016,Other mental health disorders,Moray,15 to 24,Female,DALY rate,186.5,Yes,R
2016,Other mental health disorders,Moray,25 to 44,Female,DALY rate,225.7,Yes,R
2016,Other mental health disorders,Moray,45 to 64,Female,DALY rate,151.4,Yes,R
2016,Other mental health disorders,Moray,65 to 84,Female,DALY rate,120.3,Yes,R
2016,Other mental health disorders,Moray,85 and over,Female,DALY rate,349,Yes,R
2016,Other mental health disorders,Moray,Under 15,Both sexes,DALY rate,174,Yes,R
2016,Other mental health disorders,Moray,15 to 24,Both sexes,DALY rate,188.4,Yes,R
2016,Other mental health disorders,Moray,25 to 44,Both sexes,DALY rate,190.7,Yes,R
2016,Other mental health disorders,Moray,45 to 64,Both sexes,DALY rate,143.3,Yes,R
2016,Other mental health disorders,Moray,65 to 84,Both sexes,DALY rate,118.7,Yes,R
2016,Other mental health disorders,Moray,85 and over,Both sexes,DALY rate,332.3,Yes,R
2016,Diabetes mellitus,Moray,Under 15,Male,DALY rate,19.3,Yes,G
2016,Diabetes mellitus,Moray,15 to 24,Male,DALY rate,60.2,Yes,G
2016,Diabetes mellitus,Moray,25 to 44,Male,DALY rate,147.7,Yes,G
2016,Diabetes mellitus,Moray,45 to 64,Male,DALY rate,"1,096.60",Yes,G
2016,Diabetes mellitus,Moray,65 to 84,Male,DALY rate,"1,788.00",Yes,G
2016,Diabetes mellitus,Moray,85 and over,Male,DALY rate,"1,521.40",Yes,G
2016,Diabetes mellitus,Moray,Under 15,Female,DALY rate,19.2,Yes,G
2016,Diabetes mellitus,Moray,15 to 24,Female,DALY rate,54.5,Yes,G
2016,Diabetes mellitus,Moray,25 to 44,Female,DALY rate,295.8,Yes,G
2016,Diabetes mellitus,Moray,45 to 64,Female,DALY rate,623,Yes,G
2016,Diabetes mellitus,Moray,65 to 84,Female,DALY rate,"1,777.90",Yes,G
2016,Diabetes mellitus,Moray,85 and over,Female,DALY rate,"2,846.30",Yes,G
2016,Diabetes mellitus,Moray,Under 15,Both sexes,DALY rate,19.2,Yes,G
2016,Diabetes mellitus,Moray,15 to 24,Both sexes,DALY rate,57.6,Yes,G
2016,Diabetes mellitus,Moray,25 to 44,Both sexes,DALY rate,223.8,Yes,G
2016,Diabetes mellitus,Moray,45 to 64,Both sexes,DALY rate,855.8,Yes,G
2016,Diabetes mellitus,Moray,65 to 84,Both sexes,DALY rate,"1,782.40",No,G
2016,Diabetes mellitus,Moray,85 and over,Both sexes,DALY rate,"2,361.40",Yes,G
2016,Chronic kidney disease,Moray,Under 15,Male,DALY rate,0,Yes,A
2016,Chronic kidney disease,Moray,15 to 24,Male,DALY rate,1.4,Yes,A
2016,Chronic kidney disease,Moray,25 to 44,Male,DALY rate,6.4,Yes,A
2016,Chronic kidney disease,Moray,45 to 64,Male,DALY rate,78.4,Yes,A
2016,Chronic kidney disease,Moray,65 to 84,Male,DALY rate,"1,064.90",Yes,A
2016,Chronic kidney disease,Moray,85 and over,Male,DALY rate,"4,832.60",Yes,A
2016,Chronic kidney disease,Moray,Under 15,Female,DALY rate,0,Yes,A
2016,Chronic kidney disease,Moray,15 to 24,Female,DALY rate,2.1,Yes,A
2016,Chronic kidney disease,Moray,25 to 44,Female,DALY rate,9.8,Yes,A
2016,Chronic kidney disease,Moray,45 to 64,Female,DALY rate,367.7,Yes,A
2016,Chronic kidney disease,Moray,65 to 84,Female,DALY rate,"1,042.70",Yes,A
2016,Chronic kidney disease,Moray,85 and over,Female,DALY rate,"4,678.30",No,A
2016,Chronic kidney disease,Moray,Under 15,Both sexes,DALY rate,0,Yes,A
2016,Chronic kidney disease,Moray,15 to 24,Both sexes,DALY rate,1.7,Yes,A
2016,Chronic kidney disease,Moray,25 to 44,Both sexes,DALY rate,8.1,Yes,A
2016,Chronic kidney disease,Moray,45 to 64,Both sexes,DALY rate,224.7,Yes,A
2016,Chronic kidney disease,Moray,65 to 84,Both sexes,DALY rate,"1,039.80",No,A
2016,Chronic kidney disease,Moray,85 and over,Both sexes,DALY rate,"4,582.30",No,A
2016,Other diabetes and chronic kidney disorders,Moray,Under 15,Male,DALY rate,0,Yes,R
2016,Other diabetes and chronic kidney disorders,Moray,15 to 24,Male,DALY rate,0,Yes,R
2016,Other diabetes and chronic kidney disorders,Moray,25 to 44,Male,DALY rate,0,Yes,R
2016,Other diabetes and chronic kidney disorders,Moray,45 to 64,Male,DALY rate,0,Yes,R
2016,Other diabetes and chronic kidney disorders,Moray,65 to 84,Male,DALY rate,0,Yes,R
2016,Other diabetes and chronic kidney disorders,Moray,85 and over,Male,DALY rate,0,Yes,R
2016,Other diabetes and chronic kidney disorders,Moray,Under 15,Female,DALY rate,0,Yes,R
2016,Other diabetes and chronic kidney disorders,Moray,15 to 24,Female,DALY rate,0,Yes,R
2016,Other diabetes and chronic kidney disorders,Moray,25 to 44,Female,DALY rate,0,Yes,R
2016,Other diabetes and chronic kidney disorders,Moray,45 to 64,Female,DALY rate,0,Yes,R
2016,Other diabetes and chronic kidney disorders,Moray,65 to 84,Female,DALY rate,0,Yes,R
2016,Other diabetes and chronic kidney disorders,Moray,85 and over,Female,DALY rate,0,Yes,R
2016,Other diabetes and chronic kidney disorders,Moray,Under 15,Both sexes,DALY rate,0,Yes,R
2016,Other diabetes and chronic kidney disorders,Moray,15 to 24,Both sexes,DALY rate,0,Yes,R
2016,Other diabetes and chronic kidney disorders,Moray,25 to 44,Both sexes,DALY rate,0,Yes,R
2016,Other diabetes and chronic kidney disorders,Moray,45 to 64,Both sexes,DALY rate,0,Yes,R
2016,Other diabetes and chronic kidney disorders,Moray,65 to 84,Both sexes,DALY rate,0,Yes,R
2016,Other diabetes and chronic kidney disorders,Moray,85 and over,Both sexes,DALY rate,0,Yes,R
2016,Rheumatoid arthritis,Moray,Under 15,Male,DALY rate,0.4,Yes,A
2016,Rheumatoid arthritis,Moray,15 to 24,Male,DALY rate,15,Yes,A
2016,Rheumatoid arthritis,Moray,25 to 44,Male,DALY rate,55.5,Yes,A
2016,Rheumatoid arthritis,Moray,45 to 64,Male,DALY rate,154.3,Yes,A
2016,Rheumatoid arthritis,Moray,65 to 84,Male,DALY rate,205.4,Yes,A
2016,Rheumatoid arthritis,Moray,85 and over,Male,DALY rate,"2,263.90",Yes,A
2016,Rheumatoid arthritis,Moray,Under 15,Female,DALY rate,4.6,Yes,A
2016,Rheumatoid arthritis,Moray,15 to 24,Female,DALY rate,42.9,Yes,A
2016,Rheumatoid arthritis,Moray,25 to 44,Female,DALY rate,140.5,Yes,A
2016,Rheumatoid arthritis,Moray,45 to 64,Female,DALY rate,590.3,Yes,A
2016,Rheumatoid arthritis,Moray,65 to 84,Female,DALY rate,613.7,Yes,A
2016,Rheumatoid arthritis,Moray,85 and over,Female,DALY rate,742.8,Yes,A
2016,Rheumatoid arthritis,Moray,Under 15,Both sexes,DALY rate,2.4,Yes,A
2016,Rheumatoid arthritis,Moray,15 to 24,Both sexes,DALY rate,27.7,Yes,A
2016,Rheumatoid arthritis,Moray,25 to 44,Both sexes,DALY rate,98.4,Yes,A
2016,Rheumatoid arthritis,Moray,45 to 64,Both sexes,DALY rate,374.8,Yes,A
2016,Rheumatoid arthritis,Moray,65 to 84,Both sexes,DALY rate,423.1,Yes,A
2016,Rheumatoid arthritis,Moray,85 and over,Both sexes,DALY rate,"1,290.30",Yes,A
2016,Osteoarthritis,Moray,Under 15,Male,DALY rate,0.8,Yes,A
2016,Osteoarthritis,Moray,15 to 24,Male,DALY rate,1.1,Yes,A
2016,Osteoarthritis,Moray,25 to 44,Male,DALY rate,61.9,Yes,A
2016,Osteoarthritis,Moray,45 to 64,Male,DALY rate,515.1,Yes,A
2016,Osteoarthritis,Moray,65 to 84,Male,DALY rate,879.7,Yes,A
2016,Osteoarthritis,Moray,85 and over,Male,DALY rate,538,Yes,A
2016,Osteoarthritis,Moray,Under 15,Female,DALY rate,0,Yes,A
2016,Osteoarthritis,Moray,15 to 24,Female,DALY rate,2.5,Yes,A
2016,Osteoarthritis,Moray,25 to 44,Female,DALY rate,77.2,Yes,A
2016,Osteoarthritis,Moray,45 to 64,Female,DALY rate,740.6,Yes,A
2016,Osteoarthritis,Moray,65 to 84,Female,DALY rate,"1,232.20",Yes,A
2016,Osteoarthritis,Moray,85 and over,Female,DALY rate,774.9,Yes,A
2016,Osteoarthritis,Moray,Under 15,Both sexes,DALY rate,0.4,Yes,A
2016,Osteoarthritis,Moray,15 to 24,Both sexes,DALY rate,1.8,Yes,A
2016,Osteoarthritis,Moray,25 to 44,Both sexes,DALY rate,69.6,Yes,A
2016,Osteoarthritis,Moray,45 to 64,Both sexes,DALY rate,629.2,Yes,A
2016,Osteoarthritis,Moray,65 to 84,Both sexes,DALY rate,"1,070.00",Yes,A
2016,Osteoarthritis,Moray,85 and over,Both sexes,DALY rate,689.1,Yes,A
2016,Low back and neck pain,Moray,Under 15,Male,DALY rate,156.6,Yes,A
2016,Low back and neck pain,Moray,15 to 24,Male,DALY rate,624.3,Yes,A
2016,Low back and neck pain,Moray,25 to 44,Male,DALY rate,"1,152.90",Yes,A
2016,Low back and neck pain,Moray,45 to 64,Male,DALY rate,"1,402.00",Yes,A
2016,Low back and neck pain,Moray,65 to 84,Male,DALY rate,"1,410.40",Yes,A
2016,Low back and neck pain,Moray,85 and over,Male,DALY rate,"1,492.80",Yes,A
2016,Low back and neck pain,Moray,Under 15,Female,DALY rate,197.6,Yes,A
2016,Low back and neck pain,Moray,15 to 24,Female,DALY rate,979.9,Yes,A
2016,Low back and neck pain,Moray,25 to 44,Female,DALY rate,"1,704.40",Yes,A
2016,Low back and neck pain,Moray,45 to 64,Female,DALY rate,"1,788.20",Yes,A
2016,Low back and neck pain,Moray,65 to 84,Female,DALY rate,"1,750.30",Yes,A
2016,Low back and neck pain,Moray,85 and over,Female,DALY rate,"1,688.40",Yes,A
2016,Low back and neck pain,Moray,Under 15,Both sexes,DALY rate,176.6,Yes,A
2016,Low back and neck pain,Moray,15 to 24,Both sexes,DALY rate,787.8,Yes,A
2016,Low back and neck pain,Moray,25 to 44,Both sexes,DALY rate,"1,427.90",Yes,A
2016,Low back and neck pain,Moray,45 to 64,Both sexes,DALY rate,"1,596.20",Yes,A
2016,Low back and neck pain,Moray,65 to 84,Both sexes,DALY rate,"1,593.70",Yes,A
2016,Low back and neck pain,Moray,85 and over,Both sexes,DALY rate,"1,614.40",Yes,A
2016,Other musculoskeletal disorders,Moray,Under 15,Male,DALY rate,90.1,Yes,R
2016,Other musculoskeletal disorders,Moray,15 to 24,Male,DALY rate,629.9,Yes,R
2016,Other musculoskeletal disorders,Moray,25 to 44,Male,DALY rate,316.5,Yes,R
2016,Other musculoskeletal disorders,Moray,45 to 64,Male,DALY rate,439.6,Yes,R
2016,Other musculoskeletal disorders,Moray,65 to 84,Male,DALY rate,424.3,Yes,R
2016,Other musculoskeletal disorders,Moray,85 and over,Male,DALY rate,"1,397.30",Yes,R
2016,Other musculoskeletal disorders,Moray,Under 15,Female,DALY rate,86.2,Yes,R
2016,Other musculoskeletal disorders,Moray,15 to 24,Female,DALY rate,269.5,Yes,R
2016,Other musculoskeletal disorders,Moray,25 to 44,Female,DALY rate,393.3,Yes,R
2016,Other musculoskeletal disorders,Moray,45 to 64,Female,DALY rate,524.9,Yes,R
2016,Other musculoskeletal disorders,Moray,65 to 84,Female,DALY rate,595.9,Yes,R
2016,Other musculoskeletal disorders,Moray,85 and over,Female,DALY rate,"2,861.10",Yes,R
2016,Other musculoskeletal disorders,Moray,Under 15,Both sexes,DALY rate,88.2,Yes,R
2016,Other musculoskeletal disorders,Moray,15 to 24,Both sexes,DALY rate,461.4,Yes,R
2016,Other musculoskeletal disorders,Moray,25 to 44,Both sexes,DALY rate,354.9,Yes,R
2016,Other musculoskeletal disorders,Moray,45 to 64,Both sexes,DALY rate,482.4,Yes,R
2016,Other musculoskeletal disorders,Moray,65 to 84,Both sexes,DALY rate,523.4,Yes,R
2016,Other musculoskeletal disorders,Moray,85 and over,Both sexes,DALY rate,"2,294.60",Yes,R
2016,Congenital birth defects,Moray,Under 15,Male,DALY rate,305.1,Yes,A
2016,Congenital birth defects,Moray,15 to 24,Male,DALY rate,595.8,Yes,A
2016,Congenital birth defects,Moray,25 to 44,Male,DALY rate,65.9,Yes,A
2016,Congenital birth defects,Moray,45 to 64,Male,DALY rate,182.6,Yes,A
2016,Congenital birth defects,Moray,65 to 84,Male,DALY rate,47.6,Yes,A
2016,Congenital birth defects,Moray,85 and over,Male,DALY rate,44.5,Yes,A
2016,Congenital birth defects,Moray,Under 15,Female,DALY rate,296.4,Yes,A
2016,Congenital birth defects,Moray,15 to 24,Female,DALY rate,194,Yes,A
2016,Congenital birth defects,Moray,25 to 44,Female,DALY rate,85.1,Yes,A
2016,Congenital birth defects,Moray,45 to 64,Female,DALY rate,65.5,Yes,A
2016,Congenital birth defects,Moray,65 to 84,Female,DALY rate,44.9,Yes,A
2016,Congenital birth defects,Moray,85 and over,Female,DALY rate,37.1,Yes,A
2016,Congenital birth defects,Moray,Under 15,Both sexes,DALY rate,300.9,Yes,A
2016,Congenital birth defects,Moray,15 to 24,Both sexes,DALY rate,408.1,Yes,A
2016,Congenital birth defects,Moray,25 to 44,Both sexes,DALY rate,75.5,Yes,A
2016,Congenital birth defects,Moray,45 to 64,Both sexes,DALY rate,123.3,Yes,A
2016,Congenital birth defects,Moray,65 to 84,Both sexes,DALY rate,46.2,Yes,A
2016,Congenital birth defects,Moray,85 and over,Both sexes,DALY rate,39.7,Yes,A
2016,Urinary diseases and male infertility,Moray,Under 15,Male,DALY rate,0.2,Yes,A
2016,Urinary diseases and male infertility,Moray,15 to 24,Male,DALY rate,1.7,Yes,A
2016,Urinary diseases and male infertility,Moray,25 to 44,Male,DALY rate,17.9,Yes,A
2016,Urinary diseases and male infertility,Moray,45 to 64,Male,DALY rate,215.3,Yes,A
2016,Urinary diseases and male infertility,Moray,65 to 84,Male,DALY rate,729.3,Yes,A
2016,Urinary diseases and male infertility,Moray,85 and over,Male,DALY rate,"3,287.80",Yes,A
2016,Urinary diseases and male infertility,Moray,Under 15,Female,DALY rate,0.8,Yes,A
2016,Urinary diseases and male infertility,Moray,15 to 24,Female,DALY rate,2.4,Yes,A
2016,Urinary diseases and male infertility,Moray,25 to 44,Female,DALY rate,497.1,Yes,A
2016,Urinary diseases and male infertility,Moray,45 to 64,Female,DALY rate,2.6,Yes,A
2016,Urinary diseases and male infertility,Moray,65 to 84,Female,DALY rate,207.2,Yes,A
2016,Urinary diseases and male infertility,Moray,85 and over,Female,DALY rate,"1,859.70",Yes,A
2016,Urinary diseases and male infertility,Moray,Under 15,Both sexes,DALY rate,0.5,Yes,A
2016,Urinary diseases and male infertility,Moray,15 to 24,Both sexes,DALY rate,2,Yes,A
2016,Urinary diseases and male infertility,Moray,25 to 44,Both sexes,DALY rate,262.6,Yes,A
2016,Urinary diseases and male infertility,Moray,45 to 64,Both sexes,DALY rate,107.4,Yes,A
2016,Urinary diseases and male infertility,Moray,65 to 84,Both sexes,DALY rate,443.4,Yes,A
2016,Urinary diseases and male infertility,Moray,85 and over,Both sexes,DALY rate,"2,364.90",No,A
2016,Oral disorders,Moray,Under 15,Male,DALY rate,16.3,Yes,A
2016,Oral disorders,Moray,15 to 24,Male,DALY rate,39.1,Yes,A
2016,Oral disorders,Moray,25 to 44,Male,DALY rate,58.8,Yes,A
2016,Oral disorders,Moray,45 to 64,Male,DALY rate,167.5,Yes,A
2016,Oral disorders,Moray,65 to 84,Male,DALY rate,506.7,Yes,A
2016,Oral disorders,Moray,85 and over,Male,DALY rate,766.9,Yes,A
2016,Oral disorders,Moray,Under 15,Female,DALY rate,16.5,Yes,A
2016,Oral disorders,Moray,15 to 24,Female,DALY rate,54.9,Yes,A
2016,Oral disorders,Moray,25 to 44,Female,DALY rate,79.4,Yes,A
2016,Oral disorders,Moray,45 to 64,Female,DALY rate,189.7,Yes,A
2016,Oral disorders,Moray,65 to 84,Female,DALY rate,576.1,Yes,A
2016,Oral disorders,Moray,85 and over,Female,DALY rate,"1,156.00",Yes,A
2016,Oral disorders,Moray,Under 15,Both sexes,DALY rate,16.4,Yes,A
2016,Oral disorders,Moray,15 to 24,Both sexes,DALY rate,46.4,Yes,A
2016,Oral disorders,Moray,25 to 44,Both sexes,DALY rate,69,Yes,A
2016,Oral disorders,Moray,45 to 64,Both sexes,DALY rate,178.8,Yes,A
2016,Oral disorders,Moray,65 to 84,Both sexes,DALY rate,544.9,Yes,A
2016,Oral disorders,Moray,85 and over,Both sexes,DALY rate,"1,016.00",Yes,A
2016,Sudden infant death syndrome,Moray,Under 15,Male,DALY rate,0,Yes,G
2016,Sudden infant death syndrome,Moray,15 to 24,Male,DALY rate,0,Yes,G
2016,Sudden infant death syndrome,Moray,25 to 44,Male,DALY rate,0,Yes,G
2016,Sudden infant death syndrome,Moray,45 to 64,Male,DALY rate,0,Yes,G
2016,Sudden infant death syndrome,Moray,65 to 84,Male,DALY rate,0,Yes,G
2016,Sudden infant death syndrome,Moray,85 and over,Male,DALY rate,0,Yes,G
2016,Sudden infant death syndrome,Moray,Under 15,Female,DALY rate,0,Yes,G
2016,Sudden infant death syndrome,Moray,15 to 24,Female,DALY rate,0,Yes,G
2016,Sudden infant death syndrome,Moray,25 to 44,Female,DALY rate,0,Yes,G
2016,Sudden infant death syndrome,Moray,45 to 64,Female,DALY rate,0,Yes,G
2016,Sudden infant death syndrome,Moray,65 to 84,Female,DALY rate,0,Yes,G
2016,Sudden infant death syndrome,Moray,85 and over,Female,DALY rate,0,Yes,G
2016,Sudden infant death syndrome,Moray,Under 15,Both sexes,DALY rate,0,Yes,G
2016,Sudden infant death syndrome,Moray,15 to 24,Both sexes,DALY rate,0,Yes,G
2016,Sudden infant death syndrome,Moray,25 to 44,Both sexes,DALY rate,0,Yes,G
2016,Sudden infant death syndrome,Moray,45 to 64,Both sexes,DALY rate,0,Yes,G
2016,Sudden infant death syndrome,Moray,65 to 84,Both sexes,DALY rate,0,Yes,G
2016,Sudden infant death syndrome,Moray,85 and over,Both sexes,DALY rate,0,Yes,G
2016,Gynecological diseases,Moray,Under 15,Male,DALY rate,1,Yes,R
2016,Gynecological diseases,Moray,15 to 24,Male,DALY rate,1.1,Yes,R
2016,Gynecological diseases,Moray,25 to 44,Male,DALY rate,0.8,Yes,R
2016,Gynecological diseases,Moray,45 to 64,Male,DALY rate,0.8,Yes,R
2016,Gynecological diseases,Moray,65 to 84,Male,DALY rate,1.1,Yes,R
2016,Gynecological diseases,Moray,85 and over,Male,DALY rate,1.3,Yes,R
2016,Gynecological diseases,Moray,Under 15,Female,DALY rate,18,Yes,R
2016,Gynecological diseases,Moray,15 to 24,Female,DALY rate,426.1,Yes,R
2016,Gynecological diseases,Moray,25 to 44,Female,DALY rate,683.5,Yes,R
2016,Gynecological diseases,Moray,45 to 64,Female,DALY rate,433.9,Yes,R
2016,Gynecological diseases,Moray,65 to 84,Female,DALY rate,81.9,Yes,R
2016,Gynecological diseases,Moray,85 and over,Female,DALY rate,46.8,Yes,R
2016,Gynecological diseases,Moray,Under 15,Both sexes,DALY rate,9.3,Yes,R
2016,Gynecological diseases,Moray,15 to 24,Both sexes,DALY rate,195.8,Yes,R
2016,Gynecological diseases,Moray,25 to 44,Both sexes,DALY rate,340.7,Yes,R
2016,Gynecological diseases,Moray,45 to 64,Both sexes,DALY rate,218,Yes,R
2016,Gynecological diseases,Moray,65 to 84,Both sexes,DALY rate,44.3,Yes,R
2016,Gynecological diseases,Moray,85 and over,Both sexes,DALY rate,30.2,Yes,R
2016,"Endocrine, metabolic, blood, and immune disorders",Moray,Under 15,Male,DALY rate,29.5,Yes,R
2016,"Endocrine, metabolic, blood, and immune disorders",Moray,15 to 24,Male,DALY rate,19.3,Yes,R
2016,"Endocrine, metabolic, blood, and immune disorders",Moray,25 to 44,Male,DALY rate,28.1,Yes,R
2016,"Endocrine, metabolic, blood, and immune disorders",Moray,45 to 64,Male,DALY rate,612.3,Yes,R
2016,"Endocrine, metabolic, blood, and immune disorders",Moray,65 to 84,Male,DALY rate,774.2,Yes,R
2016,"Endocrine, metabolic, blood, and immune disorders",Moray,85 and over,Male,DALY rate,927.2,Yes,R
2016,"Endocrine, metabolic, blood, and immune disorders",Moray,Under 15,Female,DALY rate,27.6,Yes,R
2016,"Endocrine, metabolic, blood, and immune disorders",Moray,15 to 24,Female,DALY rate,26.8,Yes,R
2016,"Endocrine, metabolic, blood, and immune disorders",Moray,25 to 44,Female,DALY rate,206.5,Yes,R
2016,"Endocrine, metabolic, blood, and immune disorders",Moray,45 to 64,Female,DALY rate,144.2,Yes,R
2016,"Endocrine, metabolic, blood, and immune disorders",Moray,65 to 84,Female,DALY rate,850.4,Yes,R
2016,"Endocrine, metabolic, blood, and immune disorders",Moray,85 and over,Female,DALY rate,"2,460.80",Yes,R
2016,"Endocrine, metabolic, blood, and immune disorders",Moray,Under 15,Both sexes,DALY rate,28.6,Yes,R
2016,"Endocrine, metabolic, blood, and immune disorders",Moray,15 to 24,Both sexes,DALY rate,22.7,Yes,R
2016,"Endocrine, metabolic, blood, and immune disorders",Moray,25 to 44,Both sexes,DALY rate,119,Yes,R
2016,"Endocrine, metabolic, blood, and immune disorders",Moray,45 to 64,Both sexes,DALY rate,374.4,Yes,R
2016,"Endocrine, metabolic, blood, and immune disorders",Moray,65 to 84,Both sexes,DALY rate,806.8,Yes,R
2016,"Endocrine, metabolic, blood, and immune disorders",Moray,85 and over,Both sexes,DALY rate,"1,870.80",Yes,R
2016,Transport injuries,Moray,Under 15,Male,DALY rate,10.2,Yes,G
2016,Transport injuries,Moray,15 to 24,Male,DALY rate,"3,646.60",Yes,G
2016,Transport injuries,Moray,25 to 44,Male,DALY rate,60.6,Yes,G
2016,Transport injuries,Moray,45 to 64,Male,DALY rate,310.5,Yes,G
2016,Transport injuries,Moray,65 to 84,Male,DALY rate,264.7,Yes,G
2016,Transport injuries,Moray,85 and over,Male,DALY rate,41.6,Yes,G
2016,Transport injuries,Moray,Under 15,Female,DALY rate,"1,093.20",Yes,G
2016,Transport injuries,Moray,15 to 24,Female,DALY rate,25.9,Yes,G
2016,Transport injuries,Moray,25 to 44,Female,DALY rate,24.2,Yes,G
2016,Transport injuries,Moray,45 to 64,Female,DALY rate,277.2,Yes,G
2016,Transport injuries,Moray,65 to 84,Female,DALY rate,21.1,Yes,G
2016,Transport injuries,Moray,85 and over,Female,DALY rate,35.2,Yes,G
2016,Transport injuries,Moray,Under 15,Both sexes,DALY rate,539.2,Yes,G
2016,Transport injuries,Moray,15 to 24,Both sexes,DALY rate,"1,984.70",Yes,G
2016,Transport injuries,Moray,25 to 44,Both sexes,DALY rate,42.5,Yes,G
2016,Transport injuries,Moray,45 to 64,Both sexes,DALY rate,293.8,Yes,G
2016,Transport injuries,Moray,65 to 84,Both sexes,DALY rate,135.4,Yes,G
2016,Transport injuries,Moray,85 and over,Both sexes,DALY rate,37.3,Yes,G
2016,Falls,Moray,Under 15,Male,DALY rate,73.2,Yes,G
2016,Falls,Moray,15 to 24,Male,DALY rate,119.8,Yes,G
2016,Falls,Moray,25 to 44,Male,DALY rate,93.3,Yes,G
2016,Falls,Moray,45 to 64,Male,DALY rate,108.5,Yes,G
2016,Falls,Moray,65 to 84,Male,DALY rate,398.6,Yes,G
2016,Falls,Moray,85 and over,Male,DALY rate,"4,808.00",Yes,G
2016,Falls,Moray,Under 15,Female,DALY rate,56.4,Yes,G
2016,Falls,Moray,15 to 24,Female,DALY rate,70,Yes,G
2016,Falls,Moray,25 to 44,Female,DALY rate,40.2,Yes,G
2016,Falls,Moray,45 to 64,Female,DALY rate,80.9,Yes,G
2016,Falls,Moray,65 to 84,Female,DALY rate,864.3,Yes,G
2016,Falls,Moray,85 and over,Female,DALY rate,"5,013.20",No,G
2016,Falls,Moray,Under 15,Both sexes,DALY rate,65,Yes,G
2016,Falls,Moray,15 to 24,Both sexes,DALY rate,96.9,Yes,G
2016,Falls,Moray,25 to 44,Both sexes,DALY rate,66.9,Yes,G
2016,Falls,Moray,45 to 64,Both sexes,DALY rate,94.7,Yes,G
2016,Falls,Moray,65 to 84,Both sexes,DALY rate,647.9,Yes,G
2016,Falls,Moray,85 and over,Both sexes,DALY rate,"4,878.70",No,G
2016,Other unintentional injuries,Moray,Under 15,Male,DALY rate,41.5,Yes,A
2016,Other unintentional injuries,Moray,15 to 24,Male,DALY rate,98.6,Yes,A
2016,Other unintentional injuries,Moray,25 to 44,Male,DALY rate,572,Yes,A
2016,Other unintentional injuries,Moray,45 to 64,Male,DALY rate,116.5,Yes,A
2016,Other unintentional injuries,Moray,65 to 84,Male,DALY rate,645.8,Yes,A
2016,Other unintentional injuries,Moray,85 and over,Male,DALY rate,951.8,Yes,A
2016,Other unintentional injuries,Moray,Under 15,Female,DALY rate,29.9,Yes,A
2016,Other unintentional injuries,Moray,15 to 24,Female,DALY rate,46.1,Yes,A
2016,Other unintentional injuries,Moray,25 to 44,Female,DALY rate,55,Yes,A
2016,Other unintentional injuries,Moray,45 to 64,Female,DALY rate,40.7,Yes,A
2016,Other unintentional injuries,Moray,65 to 84,Female,DALY rate,173.9,Yes,A
2016,Other unintentional injuries,Moray,85 and over,Female,DALY rate,139.9,Yes,A
2016,Other unintentional injuries,Moray,Under 15,Both sexes,DALY rate,35.9,Yes,A
2016,Other unintentional injuries,Moray,15 to 24,Both sexes,DALY rate,74.5,Yes,A
2016,Other unintentional injuries,Moray,25 to 44,Both sexes,DALY rate,308.6,Yes,A
2016,Other unintentional injuries,Moray,45 to 64,Both sexes,DALY rate,78.3,Yes,A
2016,Other unintentional injuries,Moray,65 to 84,Both sexes,DALY rate,394.3,Yes,A
2016,Other unintentional injuries,Moray,85 and over,Both sexes,DALY rate,416.3,Yes,A
2016,Self-harm and interpersonal violence,Moray,Under 15,Male,DALY rate,1.5,Yes,G
2016,Self-harm and interpersonal violence,Moray,15 to 24,Male,DALY rate,24.5,Yes,G
2016,Self-harm and interpersonal violence,Moray,25 to 44,Male,DALY rate,"3,023.70",No,G
2016,Self-harm and interpersonal violence,Moray,45 to 64,Male,DALY rate,"1,064.70",Yes,G
2016,Self-harm and interpersonal violence,Moray,65 to 84,Male,DALY rate,541.9,Yes,G
2016,Self-harm and interpersonal violence,Moray,85 and over,Male,DALY rate,5.3,Yes,G
2016,Self-harm and interpersonal violence,Moray,Under 15,Female,DALY rate,1,Yes,G
2016,Self-harm and interpersonal violence,Moray,15 to 24,Female,DALY rate,9.9,Yes,G
2016,Self-harm and interpersonal violence,Moray,25 to 44,Female,DALY rate,18.9,Yes,G
2016,Self-harm and interpersonal violence,Moray,45 to 64,Female,DALY rate,489.9,Yes,G
2016,Self-harm and interpersonal violence,Moray,65 to 84,Female,DALY rate,209.1,Yes,G
2016,Self-harm and interpersonal violence,Moray,85 and over,Female,DALY rate,634.2,Yes,G
2016,Self-harm and interpersonal violence,Moray,Under 15,Both sexes,DALY rate,1.3,Yes,G
2016,Self-harm and interpersonal violence,Moray,15 to 24,Both sexes,DALY rate,17.9,Yes,G
2016,Self-harm and interpersonal violence,Moray,25 to 44,Both sexes,DALY rate,"1,553.40",No,G
2016,Self-harm and interpersonal violence,Moray,45 to 64,Both sexes,DALY rate,772.9,No,G
2016,Self-harm and interpersonal violence,Moray,65 to 84,Both sexes,DALY rate,334.1,Yes,G
2016,Self-harm and interpersonal violence,Moray,85 and over,Both sexes,DALY rate,391.7,Yes,G
2016,Unknown cause of injury,Moray,Under 15,Male,DALY rate,33.8,Yes,A
2016,Unknown cause of injury,Moray,15 to 24,Male,DALY rate,43.3,Yes,A
2016,Unknown cause of injury,Moray,25 to 44,Male,DALY rate,64.6,Yes,A
2016,Unknown cause of injury,Moray,45 to 64,Male,DALY rate,61.9,Yes,A
2016,Unknown cause of injury,Moray,65 to 84,Male,DALY rate,57.5,Yes,A
2016,Unknown cause of injury,Moray,85 and over,Male,DALY rate,83,Yes,A
2016,Unknown cause of injury,Moray,Under 15,Female,DALY rate,25.6,Yes,A
2016,Unknown cause of injury,Moray,15 to 24,Female,DALY rate,23.8,Yes,A
2016,Unknown cause of injury,Moray,25 to 44,Female,DALY rate,27.3,Yes,A
2016,Unknown cause of injury,Moray,45 to 64,Female,DALY rate,33.8,Yes,A
2016,Unknown cause of injury,Moray,65 to 84,Female,DALY rate,49,Yes,A
2016,Unknown cause of injury,Moray,85 and over,Female,DALY rate,108,Yes,A
2016,Unknown cause of injury,Moray,Under 15,Both sexes,DALY rate,29.8,Yes,A
2016,Unknown cause of injury,Moray,15 to 24,Both sexes,DALY rate,34.3,Yes,A
2016,Unknown cause of injury,Moray,25 to 44,Both sexes,DALY rate,46,Yes,A
2016,Unknown cause of injury,Moray,45 to 64,Both sexes,DALY rate,47.8,Yes,A
2016,Unknown cause of injury,Moray,65 to 84,Both sexes,DALY rate,53.1,Yes,A
2016,Unknown cause of injury,Moray,85 and over,Both sexes,DALY rate,99,Yes,A
2016,Blindness and vision loss,Moray,Under 15,Male,DALY rate,167.6,Yes,A
2016,Blindness and vision loss,Moray,15 to 24,Male,DALY rate,140.9,Yes,A
2016,Blindness and vision loss,Moray,25 to 44,Male,DALY rate,84.5,Yes,A
2016,Blindness and vision loss,Moray,45 to 64,Male,DALY rate,144.4,Yes,A
2016,Blindness and vision loss,Moray,65 to 84,Male,DALY rate,498.2,Yes,A
2016,Blindness and vision loss,Moray,85 and over,Male,DALY rate,"1,010.10",Yes,A
2016,Blindness and vision loss,Moray,Under 15,Female,DALY rate,179.1,Yes,A
2016,Blindness and vision loss,Moray,15 to 24,Female,DALY rate,165.8,Yes,A
2016,Blindness and vision loss,Moray,25 to 44,Female,DALY rate,133.9,Yes,A
2016,Blindness and vision loss,Moray,45 to 64,Female,DALY rate,163.8,Yes,A
2016,Blindness and vision loss,Moray,65 to 84,Female,DALY rate,569,Yes,A
2016,Blindness and vision loss,Moray,85 and over,Female,DALY rate,"1,075.40",Yes,A
2016,Blindness and vision loss,Moray,Under 15,Both sexes,DALY rate,173.2,Yes,A
2016,Blindness and vision loss,Moray,15 to 24,Both sexes,DALY rate,152.2,Yes,A
2016,Blindness and vision loss,Moray,25 to 44,Both sexes,DALY rate,109.1,Yes,A
2016,Blindness and vision loss,Moray,45 to 64,Both sexes,DALY rate,154.2,Yes,A
2016,Blindness and vision loss,Moray,65 to 84,Both sexes,DALY rate,537.1,Yes,A
2016,Blindness and vision loss,Moray,85 and over,Both sexes,DALY rate,"1,053.30",Yes,A
2016,Age-related and other hearing loss,Moray,Under 15,Male,DALY rate,228.9,Yes,A
2016,Age-related and other hearing loss,Moray,15 to 24,Male,DALY rate,142.7,Yes,A
2016,Age-related and other hearing loss,Moray,25 to 44,Male,DALY rate,214.6,Yes,A
2016,Age-related and other hearing loss,Moray,45 to 64,Male,DALY rate,378.2,Yes,A
2016,Age-related and other hearing loss,Moray,65 to 84,Male,DALY rate,685.8,Yes,A
2016,Age-related and other hearing loss,Moray,85 and over,Male,DALY rate,651.7,Yes,A
2016,Age-related and other hearing loss,Moray,Under 15,Female,DALY rate,191,Yes,A
2016,Age-related and other hearing loss,Moray,15 to 24,Female,DALY rate,173.3,Yes,A
2016,Age-related and other hearing loss,Moray,25 to 44,Female,DALY rate,229.2,Yes,A
2016,Age-related and other hearing loss,Moray,45 to 64,Female,DALY rate,340,Yes,A
2016,Age-related and other hearing loss,Moray,65 to 84,Female,DALY rate,627.9,Yes,A
2016,Age-related and other hearing loss,Moray,85 and over,Female,DALY rate,801.9,Yes,A
2016,Age-related and other hearing loss,Moray,Under 15,Both sexes,DALY rate,210.5,Yes,A
2016,Age-related and other hearing loss,Moray,15 to 24,Both sexes,DALY rate,156.8,Yes,A
2016,Age-related and other hearing loss,Moray,25 to 44,Both sexes,DALY rate,222.1,Yes,A
2016,Age-related and other hearing loss,Moray,45 to 64,Both sexes,DALY rate,358.6,Yes,A
2016,Age-related and other hearing loss,Moray,65 to 84,Both sexes,DALY rate,656.3,Yes,A
2016,Age-related and other hearing loss,Moray,85 and over,Both sexes,DALY rate,745.2,Yes,A
2016,Other sensory conditions,Moray,Under 15,Male,DALY rate,71.9,Yes,A
2016,Other sensory conditions,Moray,15 to 24,Male,DALY rate,109.8,Yes,A
2016,Other sensory conditions,Moray,25 to 44,Male,DALY rate,206.2,Yes,A
2016,Other sensory conditions,Moray,45 to 64,Male,DALY rate,281,Yes,A
2016,Other sensory conditions,Moray,65 to 84,Male,DALY rate,276.2,Yes,A
2016,Other sensory conditions,Moray,85 and over,Male,DALY rate,172.1,Yes,A
2016,Other sensory conditions,Moray,Under 15,Female,DALY rate,108.8,Yes,A
2016,Other sensory conditions,Moray,15 to 24,Female,DALY rate,221.5,Yes,A
2016,Other sensory conditions,Moray,25 to 44,Female,DALY rate,352.8,Yes,A
2016,Other sensory conditions,Moray,45 to 64,Female,DALY rate,419.4,Yes,A
2016,Other sensory conditions,Moray,65 to 84,Female,DALY rate,352.4,Yes,A
2016,Other sensory conditions,Moray,85 and over,Female,DALY rate,191.4,Yes,A
2016,Other sensory conditions,Moray,Under 15,Both sexes,DALY rate,89.8,Yes,A
2016,Other sensory conditions,Moray,15 to 24,Both sexes,DALY rate,161.4,Yes,A
2016,Other sensory conditions,Moray,25 to 44,Both sexes,DALY rate,279.5,Yes,A
2016,Other sensory conditions,Moray,45 to 64,Both sexes,DALY rate,350.8,Yes,A
2016,Other sensory conditions,Moray,65 to 84,Both sexes,DALY rate,317.2,Yes,A
2016,Other sensory conditions,Moray,85 and over,Both sexes,DALY rate,184.9,Yes,A
2016,Skin and subcutaneous diseases,Moray,Under 15,Male,DALY rate,402.3,Yes,A
2016,Skin and subcutaneous diseases,Moray,15 to 24,Male,DALY rate,343.9,Yes,A
2016,Skin and subcutaneous diseases,Moray,25 to 44,Male,DALY rate,209.6,Yes,A
2016,Skin and subcutaneous diseases,Moray,45 to 64,Male,DALY rate,196.2,Yes,A
2016,Skin and subcutaneous diseases,Moray,65 to 84,Male,DALY rate,399.1,Yes,A
2016,Skin and subcutaneous diseases,Moray,85 and over,Male,DALY rate,240.1,Yes,A
2016,Skin and subcutaneous diseases,Moray,Under 15,Female,DALY rate,431.2,Yes,A
2016,Skin and subcutaneous diseases,Moray,15 to 24,Female,DALY rate,525.4,Yes,A
2016,Skin and subcutaneous diseases,Moray,25 to 44,Female,DALY rate,371.4,Yes,A
2016,Skin and subcutaneous diseases,Moray,45 to 64,Female,DALY rate,239.8,Yes,A
2016,Skin and subcutaneous diseases,Moray,65 to 84,Female,DALY rate,222,Yes,A
2016,Skin and subcutaneous diseases,Moray,85 and over,Female,DALY rate,"1,497.10",Yes,A
2016,Skin and subcutaneous diseases,Moray,Under 15,Both sexes,DALY rate,416.6,Yes,A
2016,Skin and subcutaneous diseases,Moray,15 to 24,Both sexes,DALY rate,427.5,Yes,A
2016,Skin and subcutaneous diseases,Moray,25 to 44,Both sexes,DALY rate,290.3,Yes,A
2016,Skin and subcutaneous diseases,Moray,45 to 64,Both sexes,DALY rate,218.1,Yes,A
2016,Skin and subcutaneous diseases,Moray,65 to 84,Both sexes,DALY rate,294.6,Yes,A
2016,Skin and subcutaneous diseases,Moray,85 and over,Both sexes,DALY rate,"1,054.40",Yes,A
2016,All causes of disease and injury,Aberdeen City,Under 15,Male,DALY rate,"6,394.40",No,na
2016,All causes of disease and injury,Aberdeen City,15 to 24,Male,DALY rate,"9,785.70",No,na
2016,All causes of disease and injury,Aberdeen City,25 to 44,Male,DALY rate,"17,522.40",No,na
2016,All causes of disease and injury,Aberdeen City,45 to 64,Male,DALY rate,"38,359.30",No,na
2016,All causes of disease and injury,Aberdeen City,65 to 84,Male,DALY rate,"85,736.40",No,na
2016,All causes of disease and injury,Aberdeen City,85 and over,Male,DALY rate,"170,076.10",No,na
2016,All causes of disease and injury,Aberdeen City,Under 15,Female,DALY rate,"4,543.00",Yes,na
2016,All causes of disease and injury,Aberdeen City,15 to 24,Female,DALY rate,"7,888.10",Yes,na
2016,All causes of disease and injury,Aberdeen City,25 to 44,Female,DALY rate,"18,235.60",No,na
2016,All causes of disease and injury,Aberdeen City,45 to 64,Female,DALY rate,"30,310.50",No,na
2016,All causes of disease and injury,Aberdeen City,65 to 84,Female,DALY rate,"63,483.90",No,na
2016,All causes of disease and injury,Aberdeen City,85 and over,Female,DALY rate,"157,779.10",No,na
2016,All causes of disease and injury,Aberdeen City,Under 15,Both sexes,DALY rate,"5,480.80",No,na
2016,All causes of disease and injury,Aberdeen City,15 to 24,Both sexes,DALY rate,"8,795.50",No,na
2016,All causes of disease and injury,Aberdeen City,25 to 44,Both sexes,DALY rate,"17,870.90",No,na
2016,All causes of disease and injury,Aberdeen City,45 to 64,Both sexes,DALY rate,"34,362.10",No,na
2016,All causes of disease and injury,Aberdeen City,65 to 84,Both sexes,DALY rate,"73,628.00",No,na
2016,All causes of disease and injury,Aberdeen City,85 and over,Both sexes,DALY rate,"162,359.80",No,na
2016,HIV/AIDS and tuberculosis,Aberdeen City,Under 15,Male,DALY rate,0.7,Yes,G
2016,HIV/AIDS and tuberculosis,Aberdeen City,15 to 24,Male,DALY rate,3.4,Yes,G
2016,HIV/AIDS and tuberculosis,Aberdeen City,25 to 44,Male,DALY rate,25.4,Yes,G
2016,HIV/AIDS and tuberculosis,Aberdeen City,45 to 64,Male,DALY rate,149.8,Yes,G
2016,HIV/AIDS and tuberculosis,Aberdeen City,65 to 84,Male,DALY rate,5.2,Yes,G
2016,HIV/AIDS and tuberculosis,Aberdeen City,85 and over,Male,DALY rate,18,Yes,G
2016,HIV/AIDS and tuberculosis,Aberdeen City,Under 15,Female,DALY rate,1,Yes,G
2016,HIV/AIDS and tuberculosis,Aberdeen City,15 to 24,Female,DALY rate,2.5,Yes,G
2016,HIV/AIDS and tuberculosis,Aberdeen City,25 to 44,Female,DALY rate,11.2,Yes,G
2016,HIV/AIDS and tuberculosis,Aberdeen City,45 to 64,Female,DALY rate,133.6,Yes,G
2016,HIV/AIDS and tuberculosis,Aberdeen City,65 to 84,Female,DALY rate,2.1,Yes,G
2016,HIV/AIDS and tuberculosis,Aberdeen City,85 and over,Female,DALY rate,2.9,Yes,G
2016,HIV/AIDS and tuberculosis,Aberdeen City,Under 15,Both sexes,DALY rate,0.9,Yes,G
2016,HIV/AIDS and tuberculosis,Aberdeen City,15 to 24,Both sexes,DALY rate,2.9,Yes,G
2016,HIV/AIDS and tuberculosis,Aberdeen City,25 to 44,Both sexes,DALY rate,18.7,Yes,G
2016,HIV/AIDS and tuberculosis,Aberdeen City,45 to 64,Both sexes,DALY rate,141.7,Yes,G
2016,HIV/AIDS and tuberculosis,Aberdeen City,65 to 84,Both sexes,DALY rate,3.5,Yes,G
2016,HIV/AIDS and tuberculosis,Aberdeen City,85 and over,Both sexes,DALY rate,7.5,Yes,G
2016,Lower respiratory infections,Aberdeen City,Under 15,Male,DALY rate,28.1,Yes,G
2016,Lower respiratory infections,Aberdeen City,15 to 24,Male,DALY rate,11.7,Yes,G
2016,Lower respiratory infections,Aberdeen City,25 to 44,Male,DALY rate,192.4,Yes,G
2016,Lower respiratory infections,Aberdeen City,45 to 64,Male,DALY rate,276.3,Yes,G
2016,Lower respiratory infections,Aberdeen City,65 to 84,Male,DALY rate,"2,203.00",No,G
2016,Lower respiratory infections,Aberdeen City,85 and over,Male,DALY rate,"10,111.30",No,G
2016,Lower respiratory infections,Aberdeen City,Under 15,Female,DALY rate,22.9,Yes,G
2016,Lower respiratory infections,Aberdeen City,15 to 24,Female,DALY rate,15.9,Yes,G
2016,Lower respiratory infections,Aberdeen City,25 to 44,Female,DALY rate,23.1,Yes,G
2016,Lower respiratory infections,Aberdeen City,45 to 64,Female,DALY rate,527.6,Yes,G
2016,Lower respiratory infections,Aberdeen City,65 to 84,Female,DALY rate,"1,230.80",No,G
2016,Lower respiratory infections,Aberdeen City,85 and over,Female,DALY rate,"11,332.00",No,G
2016,Lower respiratory infections,Aberdeen City,Under 15,Both sexes,DALY rate,25.5,Yes,G
2016,Lower respiratory infections,Aberdeen City,15 to 24,Both sexes,DALY rate,13.9,Yes,G
2016,Lower respiratory infections,Aberdeen City,25 to 44,Both sexes,DALY rate,110.6,Yes,G
2016,Lower respiratory infections,Aberdeen City,45 to 64,Both sexes,DALY rate,401,No,G
2016,Lower respiratory infections,Aberdeen City,65 to 84,Both sexes,DALY rate,"1,653.10",No,G
2016,Lower respiratory infections,Aberdeen City,85 and over,Both sexes,DALY rate,"10,960.00",No,G
2016,Diarrhoea and other common infections,Aberdeen City,Under 15,Male,DALY rate,119.6,Yes,A
2016,Diarrhoea and other common infections,Aberdeen City,15 to 24,Male,DALY rate,70.1,Yes,A
2016,Diarrhoea and other common infections,Aberdeen City,25 to 44,Male,DALY rate,60.5,Yes,A
2016,Diarrhoea and other common infections,Aberdeen City,45 to 64,Male,DALY rate,50.9,Yes,A
2016,Diarrhoea and other common infections,Aberdeen City,65 to 84,Male,DALY rate,344.7,Yes,A
2016,Diarrhoea and other common infections,Aberdeen City,85 and over,Male,DALY rate,36,Yes,A
2016,Diarrhoea and other common infections,Aberdeen City,Under 15,Female,DALY rate,111.2,Yes,A
2016,Diarrhoea and other common infections,Aberdeen City,15 to 24,Female,DALY rate,82,Yes,A
2016,Diarrhoea and other common infections,Aberdeen City,25 to 44,Female,DALY rate,74.1,Yes,A
2016,Diarrhoea and other common infections,Aberdeen City,45 to 64,Female,DALY rate,63.2,Yes,A
2016,Diarrhoea and other common infections,Aberdeen City,65 to 84,Female,DALY rate,551.3,Yes,A
2016,Diarrhoea and other common infections,Aberdeen City,85 and over,Female,DALY rate,"1,147.50",Yes,A
2016,Diarrhoea and other common infections,Aberdeen City,Under 15,Both sexes,DALY rate,115.5,Yes,A
2016,Diarrhoea and other common infections,Aberdeen City,15 to 24,Both sexes,DALY rate,76.3,Yes,A
2016,Diarrhoea and other common infections,Aberdeen City,25 to 44,Both sexes,DALY rate,67,Yes,A
2016,Diarrhoea and other common infections,Aberdeen City,45 to 64,Both sexes,DALY rate,57,Yes,A
2016,Diarrhoea and other common infections,Aberdeen City,65 to 84,Both sexes,DALY rate,441,No,A
2016,Diarrhoea and other common infections,Aberdeen City,85 and over,Both sexes,DALY rate,780,Yes,A
2016,Neonatal disorders,Aberdeen City,Under 15,Male,DALY rate,15.9,Yes,G
2016,Neonatal disorders,Aberdeen City,15 to 24,Male,DALY rate,8.3,Yes,G
2016,Neonatal disorders,Aberdeen City,25 to 44,Male,DALY rate,0,Yes,G
2016,Neonatal disorders,Aberdeen City,45 to 64,Male,DALY rate,0,Yes,G
2016,Neonatal disorders,Aberdeen City,65 to 84,Male,DALY rate,0,Yes,G
2016,Neonatal disorders,Aberdeen City,85 and over,Male,DALY rate,0,Yes,G
2016,Neonatal disorders,Aberdeen City,Under 15,Female,DALY rate,"1,406.40",Yes,G
2016,Neonatal disorders,Aberdeen City,15 to 24,Female,DALY rate,8,Yes,G
2016,Neonatal disorders,Aberdeen City,25 to 44,Female,DALY rate,0.1,Yes,G
2016,Neonatal disorders,Aberdeen City,45 to 64,Female,DALY rate,0,Yes,G
2016,Neonatal disorders,Aberdeen City,65 to 84,Female,DALY rate,0,Yes,G
2016,Neonatal disorders,Aberdeen City,85 and over,Female,DALY rate,0.1,Yes,G
2016,Neonatal disorders,Aberdeen City,Under 15,Both sexes,DALY rate,697.1,Yes,G
2016,Neonatal disorders,Aberdeen City,15 to 24,Both sexes,DALY rate,8.1,Yes,G
2016,Neonatal disorders,Aberdeen City,25 to 44,Both sexes,DALY rate,0,Yes,G
2016,Neonatal disorders,Aberdeen City,45 to 64,Both sexes,DALY rate,0,Yes,G
2016,Neonatal disorders,Aberdeen City,65 to 84,Both sexes,DALY rate,0,Yes,G
2016,Neonatal disorders,Aberdeen City,85 and over,Both sexes,DALY rate,0.1,Yes,G
2016,Maternal disorders,Aberdeen City,Under 15,Male,DALY rate,0,Yes,A
2016,Maternal disorders,Aberdeen City,15 to 24,Male,DALY rate,0,Yes,A
2016,Maternal disorders,Aberdeen City,25 to 44,Male,DALY rate,0,Yes,A
2016,Maternal disorders,Aberdeen City,45 to 64,Male,DALY rate,0,Yes,A
2016,Maternal disorders,Aberdeen City,65 to 84,Male,DALY rate,0,Yes,A
2016,Maternal disorders,Aberdeen City,85 and over,Male,DALY rate,0,Yes,A
2016,Maternal disorders,Aberdeen City,Under 15,Female,DALY rate,0,Yes,A
2016,Maternal disorders,Aberdeen City,15 to 24,Female,DALY rate,69.4,Yes,A
2016,Maternal disorders,Aberdeen City,25 to 44,Female,DALY rate,69.6,Yes,A
2016,Maternal disorders,Aberdeen City,45 to 64,Female,DALY rate,0.3,Yes,A
2016,Maternal disorders,Aberdeen City,65 to 84,Female,DALY rate,0,Yes,A
2016,Maternal disorders,Aberdeen City,85 and over,Female,DALY rate,0,Yes,A
2016,Maternal disorders,Aberdeen City,Under 15,Both sexes,DALY rate,0,Yes,A
2016,Maternal disorders,Aberdeen City,15 to 24,Both sexes,DALY rate,36.4,Yes,A
2016,Maternal disorders,Aberdeen City,25 to 44,Both sexes,DALY rate,33.2,Yes,A
[truncated: 2,401,276 more chars]
